# Supplementary material for: Pd-catalyzed dehydrogenative annulation approach for the efficient synthesis of phenanthridinones
Source: PubMed Central journal article supplement — Chem Sci. 2016 Apr 26;7(8):5384–9. doi: 10.1039/c6sc01148a (PMC6020758; doi:10.1039/c6sc01148a), 2016-04-26

# **Pd-catalyzed dehydrogenative annulation approach for the efficient synthesis of phenanthridinones**

## **(Electronic Supplementary Information)**

Xinyao Li<sup>†</sup>, Jun Pan<sup>†</sup>, Song Song<sup>†</sup>, and Ning Jiao<sup>\*,†,‡</sup>

<sup>†</sup>State Key Laboratory of Natural and Biomimetic Drugs, Peking University, Xue Yuan Rd. 38, Beijing  
100191, China

<sup>‡</sup>State Key Laboratory of Elemento-organic Chemistry, Nankai University, Weijin Rd. 94,  
Tianjin 300071, China

### **Table of Contents**

|                                                  |          |
|--------------------------------------------------|----------|
| General remarks                                  | S2       |
| Optimization of reaction conditions              | S2       |
| Preliminary mechanistic studies                  | S3-S4    |
| Experimental procedure and characterization data | S4-S22   |
| Details of calculation                           | S22      |
| DFT-computed energies of all stationary points   | S23-S24  |
| The coordinates of all stationary points (Å)     | S24-S39  |
| References                                       | S40      |
| NMR spectra                                      | S41-S122 |

## General remarks

All manipulations were conducted with schlenk tubes. <sup>1</sup>H-NMR spectra were recorded on Bruker AVANCE III-400 spectrometers. Chemical shifts (in ppm) were calibrated with CDCl<sub>3</sub> or DMSO-d<sub>6</sub> (tetramethylsilane, δ = 0 ppm). <sup>13</sup>C-NMR spectra were obtained by using the same NMR spectrometers and were calibrated with CDCl<sub>3</sub> (δ = 77.00 ppm) or DMSO-d<sub>6</sub> (δ = 39.50 ppm). NMR yields were determined using standard curves with 1,1,2,2-tetrachloroethane as internal standard. EI-MS data was obtained from Agilent 7890A-5975C GCMS system. High Resolution Mass spectra were recorded using a Fourier Transform Ion Cyclotron Resonance Mass spectrometer (APEX IV, Bruker). Unless otherwise noted, materials obtained from commercial suppliers were used without further purification.

## Optimization of reaction conditions

**Table S1:** Control experiments for acylation and annulation.<sup>[a]</sup>

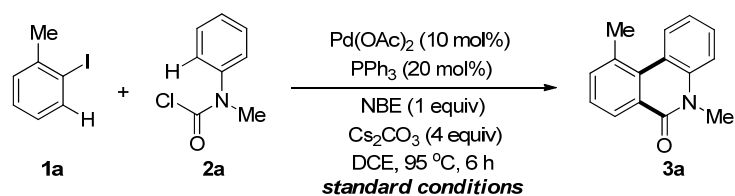

| Entry | Change from the standard conditions                                       | Yield [%] <sup>[b]</sup> |
|-------|---------------------------------------------------------------------------|--------------------------|
| 1     | none                                                                      | 99 (98) <sup>c</sup>     |
| 2     | no Pd(OAc) <sub>2</sub>                                                   | 0                        |
| 3     | no PPh <sub>3</sub>                                                       | 0                        |
| 4     | no NBE                                                                    | 0                        |
| 5     | no Cs <sub>2</sub> CO <sub>3</sub>                                        | 0                        |
| 6     | PdCl <sub>2</sub> instead of Pd(OAc) <sub>2</sub>                         | 54                       |
| 7     | TFP instead of PPh <sub>3</sub>                                           | 83                       |
| 8     | K <sub>2</sub> CO <sub>3</sub> instead of Cs <sub>2</sub> CO <sub>3</sub> | 31                       |
| 9     | dioxane instead of DCE                                                    | 5                        |
| 10    | MeCN instead of DCE                                                       | 12                       |
| 11    | toluene instead of DCE                                                    | 96                       |
| 12    | 80°C                                                                      | 45                       |

[a] Reaction conditions: **1a** (0.2 mmol), **2a** (0.4 mmol), Pd catalyst (0.02 mmol), ligand (0.04 mmol), NBE (0.2 mmol), and base (0.8 mmol) in solvent (2 mL) at 95 °C for 6 h. [b] Determined by <sup>1</sup>H NMR of crude product using internal standard. [c] Isolated yield.

Initially, we endeavoured to realize Pd-catalyzed dehydrogenative acylation and annulation reaction using iodobenzenes and anilines with norbornene under CO, however, only the ipso position of iodobenzenes was carbonylated, providing linear amides without cyclization. We hypothesized that properly pre-functionalized carbonyl anilines may inhibit the carbonylation at ipso position in order to preclude the byproducts. As our expected, when 1-iodo-2-methylbenzene (**1a**) was reacted with methyl(phenyl)carbamic chloride (**2a**), the intermolecular acylation and

annulation was carried out, successfully affording phenanthridinone **3a** (Table S1). The desired product **3a** could be obtained up to 99% yield when using Pd(OAc)<sub>2</sub>/PPh<sub>3</sub> as the metal/ligand combination, NBE, and Cs<sub>2</sub>CO<sub>3</sub> as the base in DCE at 95 °C (entry 1). A series of control experiments indicated that the palladium, phosphine ligand, NBE, and base were all essential for this transformation (entries 2–5). PdCl<sub>2</sub> catalyst diminished the yield indicating that acetate anion is more helpful to the C–H activation (entry 6). In contrast, when more-electron-deficient tri(2-furyl)phosphine ligand was tested, the yield was inferior slightly (entry 7). When using potassium carbonate as a base, the yield was dramatically decreased (entry 8). Among the solvents tested, the polar solvents such as dioxane and MeCN suppressed this reaction (entries 9–10), while non-polar solvents such as DCE and toluene showed the optimal conditions (entries 1 and 11). Finally, the reaction could still proceed even at 80 °C albeit giving lower yield (entry 12).

### Preliminary mechanistic studies

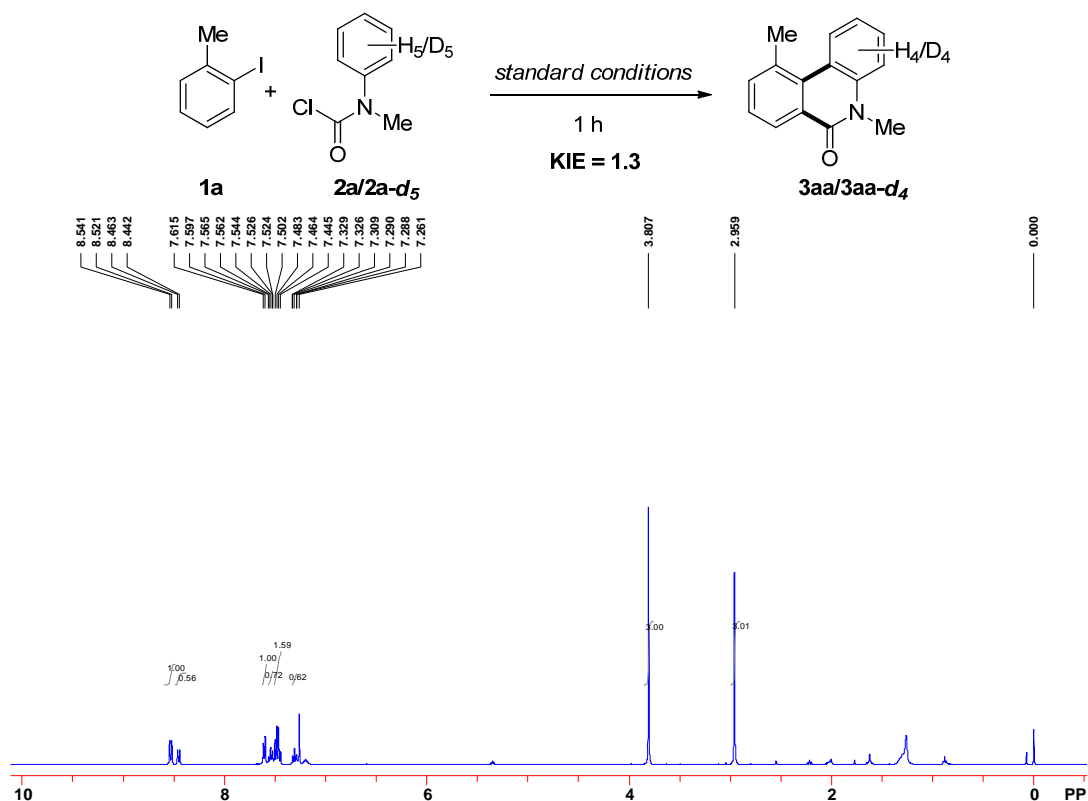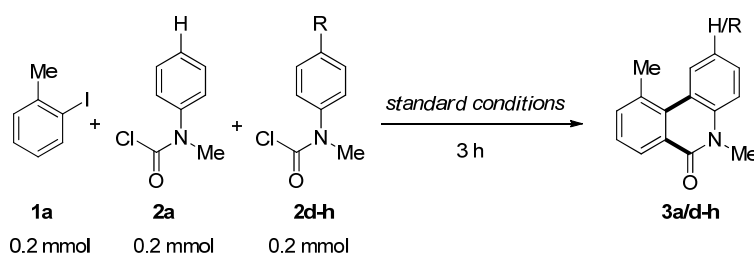

**3a(H) : 3d-h(Me, F, Cl, OCF<sub>3</sub>, CN)**

| <b>3a:3d</b> | <b>3a:3e</b> | <b>3a:3f</b> | <b>3a:3g</b> | <b>3a:3h</b> |
|--------------|--------------|--------------|--------------|--------------|
| 1:1.12       | 1:0.90       | 1:0.78       | 1:0.68       | 1:0.47       |

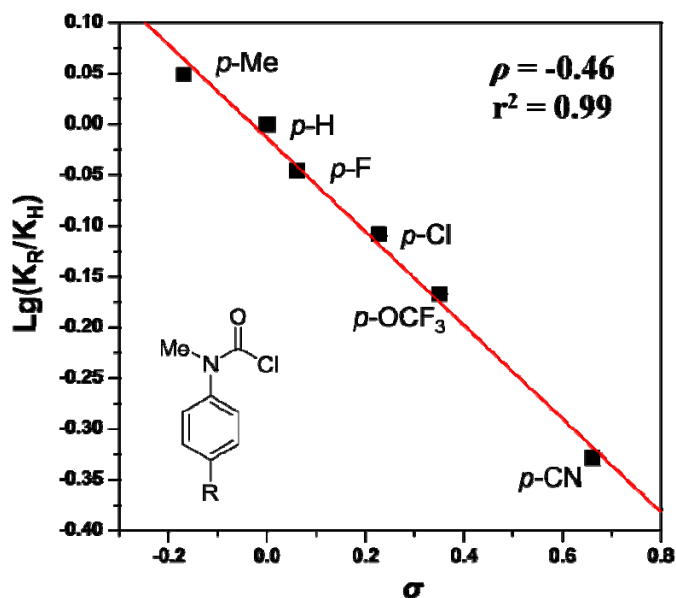

Fig. S1. Hammett plot of the acylation and annulation of substituted aryl carbamic chlorides **2**

## Experimental procedure and characterization data

### Preparation of aryl iodides **1** and aryl carbamic chlorides **2**

Aryl iodides **1a-g** and **1i-l** were purchased from commercial sources. **1h** was prepared according to literature methods.<sup>1</sup> For the preparation of **1m**, see the reference.<sup>2</sup> Aryl carbamic chlorides **2** were prepared following the known procedures.<sup>3</sup>

### Typical procedure for Pd-catalyzed acylation and annulation of aryl iodides and aryl carbamic chlorides:

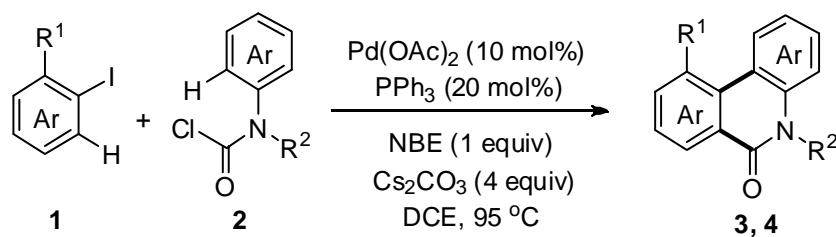

Aryl iodides **1** (0.2 mmol), aryl carbamic chlorides **2** (0.4 mmol), Pd(OAc)<sub>2</sub> (0.02 mmol), PPh<sub>3</sub> (0.04 mmol), NBE (0.2 mmol), Cs<sub>2</sub>CO<sub>3</sub> (0.8 mmol), and DCE (2 mL) were added to a 20 mL Schlenk flask with a magnetic stir bar and the mixture was heated at 95 °C. Monitor the reaction by TLC to confirm whether the aryl iodides disappeared. After cooling to room temperature, the reaction mixture was diluted with AcOEt (5.0 mL) and the solution was concentrated under vacuum. Finally, the mixture was purified through column chromatography to afford the pure product.

### Phenanthridinones

5,10-dimethylphenanthridin-6(5H)-one (**3a**)<sup>4</sup>

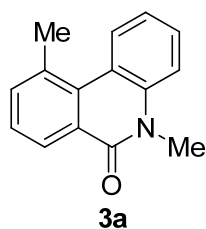

The reaction of 1-iodo-2-methylbenzene (**1a**) (43.6 mg, 0.2 mmol), methyl(phenyl)carbamic chloride (**2a**) (67.9 mg, 0.4 mmol), Pd(OAc)<sub>2</sub> (4.5 mg, 0.02 mmol), PPh<sub>3</sub> (10.5 mg, 0.04 mmol), NBE (18.8 mg, 0.2 mmol), and Cs<sub>2</sub>CO<sub>3</sub> (260.6 mg, 0.8 mmol) in DCE (2 mL) at 95 °C for 6 h, isolated by column chromatography (silica gel, petroleum ether/AcOEt = 12/1), affords 43.8 mg (98%) of **3a** as white solid, along with 16.7 mg (0.07 mmol) of byproduct **9a** as white solid.

**<sup>1</sup>H NMR (400 MHz, CDCl<sub>3</sub>):** δ 8.49 (d, *J* = 7.6 Hz, 1H), 8.36 (d, *J* = 8.4 Hz, 1H), 7.54 (d, *J* = 7.2 Hz, 1H), 7.48 (t, *J* = 8.0 Hz, 1H), 7.43 (t, *J* = 8.0 Hz, 1H), 7.37 (d, *J* = 8.4 Hz, 1H), 7.24 (d, *J* = 7.6 Hz, 1H), 3.75 (s, 3H), 2.88 (s, 3H).

**<sup>13</sup>C NMR (100 MHz, CDCl<sub>3</sub>):** δ 161.8, 138.1, 136.7(2C), 134.3, 132.8, 128.5, 127.7, 127.2, 127.1, 121.4, 120.6, 114.6, 30.2, 25.9.

**EI-MS:** *m/z* 223.1.

1,3-dimethyl-1,3-diphenylurea (**9a**)<sup>5</sup>

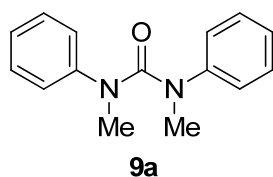

**<sup>1</sup>H NMR (400 MHz, CDCl<sub>3</sub>):** δ 7.04 (t, *J* = 7.6 Hz, 4H), 6.92 (t, *J* = 7.2 Hz, 2H), 6.77-6.80 (m, 4H), 3.19 (s, 6H).

**<sup>13</sup>C NMR (100 MHz, CDCl<sub>3</sub>):** δ 161.2, 145.5, 128.5, 125.6, 124.7, 39.2.

**EI-MS:** *m/z* 240.1.

4,5,10-trimethylphenanthridin-6(5*H*)-one (**3b**)

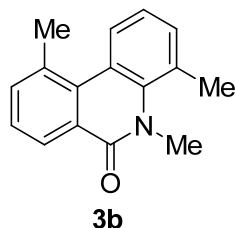

The reaction of 1-iodo-2-methylbenzene (**1a**) (43.6 mg, 0.2 mmol), methyl(*o*-tolyl)carbamic chloride (**2b**) (73.5 mg, 0.4 mmol), Pd(OAc)<sub>2</sub> (4.5 mg, 0.02 mmol), PPh<sub>3</sub> (10.5 mg, 0.04 mmol), NBE (18.8 mg, 0.2 mmol), and Cs<sub>2</sub>CO<sub>3</sub> (260.6 mg, 0.8 mmol) in DCE (2 mL) at 95 °C for 6 h, isolated by column chromatography (silica gel, petroleum ether/AcOEt = 12/1), affords 45.6 mg (96%) of **3b** as white solid.

**<sup>1</sup>H NMR (400 MHz, CDCl<sub>3</sub>):** δ 8.41 (dd, *J* = 7.6, 0.8 Hz, 1H), 8.19 (d, *J* = 7.6 Hz, 1H), 7.57 (dd, *J* = 7.6, 0.8 Hz, 1H), 7.43 (t, *J* = 8.0 Hz, 1H), 7.29 (dd, *J* = 7.6, 0.8 Hz, 1H), 7.19 (t, *J* = 8.0 Hz, 1H), 3.74 (s, 3H), 2.91 (s, 3H), 2.64 (s, 3H).

**<sup>13</sup>C NMR (100 MHz, CDCl<sub>3</sub>):** δ 164.7, 139.3, 136.7, 134.1, 133.8, 132.9, 127.6, 127.1, 126.7, 126.4, 125.3, 123.2, 122.2, 38.9, 25.5, 23.4.

**HRMS *m/z* (ESI)** calcd for C<sub>16</sub>H<sub>16</sub>NO [M+H]<sup>+</sup> 238.1226, found: 238.1230; calcd for C<sub>16</sub>H<sub>15</sub>NNaO [M+Na]<sup>+</sup> 260.1046, found: 260.1049.

3,5,10-trimethylphenanthridin-6(5*H*)-one (**3c**) and 1,5,10-trimethylphenanthridin-6(5*H*)-one (**3c'**)

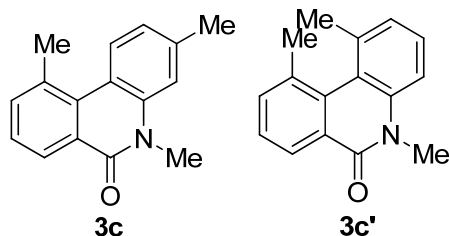

The reaction of 1-iodo-2-methylbenzene (**1a**) (43.6 mg, 0.2 mmol), methyl(*m*-tolyl)carbamic chloride (**2c**) (73.5 mg, 0.4 mmol), Pd(OAc)<sub>2</sub> (4.5 mg, 0.02 mmol), PPh<sub>3</sub> (10.5 mg, 0.04 mmol), NBE (18.8 mg, 0.2 mmol), and Cs<sub>2</sub>CO<sub>3</sub> (260.6 mg, 0.8 mmol) in DCE (2 mL) at 95 °C for 6 h, isolated by column chromatography (silica gel, petroleum ether/AcOEt = 10/1), affords 43.2 mg (91%) of **3c** and 3.6 mg (8%) of **3c'** as white solids.

**3c:**

**<sup>1</sup>H NMR (400 MHz, CDCl<sub>3</sub>):** δ 8.48 (dd, *J* = 8.0, 1.2 Hz, 1H), 8.24 (d, *J* = 8.4 Hz, 1H), 7.52 (dd, *J* = 7.2, 0.4 Hz, 1H), 7.40 (t, *J* = 7.6 Hz, 1H), 7.17 (s, 1H), 7.05 (dd, *J* = 8.0, 1.2 Hz, 1H), 3.74 (s, 3H), 2.87 (s, 3H), 2.47 (s, 3H).

**<sup>13</sup>C NMR (100 MHz, CDCl<sub>3</sub>):** δ 162.0, 138.8, 138.2, 136.6, 134.0, 132.9, 127.5, 127.1, 126.8, 126.6, 122.5, 118.2, 115.1, 30.2, 25.9, 21.6.

**HRMS *m/z* (ESI)** calcd for C<sub>16</sub>H<sub>16</sub>NO [M+H]<sup>+</sup> 238.1226, found: 238.1230.

**3c':**

**<sup>1</sup>H NMR (400 MHz, CDCl<sub>3</sub>):** δ 8.31 (d, *J* = 7.6 Hz, 1H), 7.56 (d, *J* = 6.8 Hz, 1H), 7.49 (t, *J* = 7.6 Hz, 1H), 7.41 (t, *J* = 7.6 Hz, 1H), 7.18 (d, *J* = 8.4 Hz, 1H), 7.14 (d, *J* = 7.2 Hz, 1H), 3.67 (s, 3H), 2.45 (s, 6H).

**<sup>13</sup>C NMR (100 MHz, CDCl<sub>3</sub>):** δ 162.4, 138.5, 136.5, 135.2, 134.1, 133.6, 128.7, 128.0, 127.0, 125.3, 124.9, 119.7, 110.9, 30.4, 22.1, 21.7.

**HRMS *m/z* (ESI)** calcd for C<sub>16</sub>H<sub>16</sub>NO [M+H]<sup>+</sup> 238.1226, found: 238.1229.

2,5,10-trimethylphenanthridin-6(5*H*)-one (**3d**)

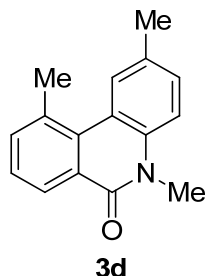

The reaction of 1-iodo-2-methylbenzene (**1a**) (43.6 mg, 0.2 mmol), methyl(*p*-tolyl)carbamic chloride (**2d**) (73.5 mg, 0.4 mmol), Pd(OAc)<sub>2</sub> (4.5 mg, 0.02 mmol), PPh<sub>3</sub> (10.5 mg, 0.04 mmol), NBE (18.8 mg, 0.2 mmol), and Cs<sub>2</sub>CO<sub>3</sub> (260.6 mg, 0.8 mmol) in DCE (2 mL) at 95 °C for 6 h, isolated by column chromatography (silica gel, petroleum ether/AcOEt = 15/1), affords 46.5 mg

(98%) of **3d** as white solid.

**<sup>1</sup>H NMR (400 MHz, CDCl<sub>3</sub>):** δ 8.52 (d, *J* = 8.0 Hz, 1H), 8.25 (s, 1H), 7.59 (d, *J* = 7.6 Hz, 1H), 7.47 (d, *J* = 7.6 Hz, 1H), 7.35 (s, 2H), 3.78 (s, 3H), 2.96 (s, 3H), 2.49 (s, 3H).

**<sup>13</sup>C NMR (100 MHz, CDCl<sub>3</sub>):** δ 161.8, 136.6, 136.0, 134.3, 132.9, 130.7, 129.4, 128.0, 127.3, 127.2, 127.0, 120.6, 114.5, 30.3, 26.0, 21.2.

**HRMS *m/z* (ESI)** calcd for C<sub>16</sub>H<sub>16</sub>NO [M+H]<sup>+</sup> 238.1226, found: 238.1230; calcd for C<sub>16</sub>H<sub>15</sub>NNaO [M+Na]<sup>+</sup> 260.1046, found: 260.1049.

2-fluoro-5,10-dimethylphenanthridin-6(5*H*)-one (**3e**)

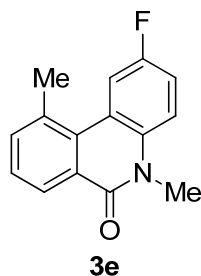

The reaction of 1-iodo-2-methylbenzene (**1a**) (43.6 mg, 0.2 mmol), (4-fluorophenyl)(methyl)carbamic chloride (**2e**) (75.0 mg, 0.4 mmol), Pd(OAc)<sub>2</sub> (4.5 mg, 0.02 mmol), PPh<sub>3</sub> (10.5 mg, 0.04 mmol), NBE (18.8 mg, 0.2 mmol), and Cs<sub>2</sub>CO<sub>3</sub> (260.6 mg, 0.8 mmol) in DCE (2 mL) at 95 °C for 6 h, isolated by column chromatography (silica gel, petroleum ether/AcOEt = 7/1), affords 44.8 mg (93%) of **3e** as white solid.

**<sup>1</sup>H NMR (400 MHz, CDCl<sub>3</sub>):** δ 8.48 (d, *J* = 7.6 Hz, 1H), 8.08 (d, *J* = 7.2 Hz, 1H), 7.56 (d, *J* = 7.2 Hz, 1H), 7.46 (t, *J* = 7.6 Hz, 1H), 7.33 (dd, *J* = 8.8, 5.2 Hz, 1H), 7.21 (t, *J* = 7.8 Hz, 1H), 3.74 (s, 3H), 2.88 (s, 3H).

**<sup>13</sup>C NMR (100 MHz, CDCl<sub>3</sub>):** δ 161.4, 157.5 (d, *J* = 237.1 Hz), 136.9, 134.8, 134.5, 131.9, 127.8, 127.5, 121.9 (d, *J* = 8.2 Hz), 115.8 (d, *J* = 8.9 Hz), 115.5 (d, *J* = 23.0 Hz), 114.1, 113.8, 30.5, 25.7.

**HRMS *m/z* (ESI)** calcd for C<sub>15</sub>H<sub>13</sub>FNO [M+H]<sup>+</sup> 242.0976, found: 242.0973.

2-chloro-5,10-dimethylphenanthridin-6(5*H*)-one (**3f**)

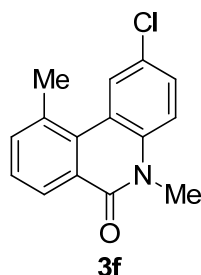

The reaction of 1-iodo-2-methylbenzene (**1a**) (43.6 mg, 0.2 mmol), (4-chlorophenyl)(methyl)carbamic chloride (**2f**) (81.6 mg, 0.4 mmol), Pd(OAc)<sub>2</sub> (4.5 mg, 0.02 mmol), PPh<sub>3</sub> (10.5 mg, 0.04 mmol), NBE (18.8 mg, 0.2 mmol), and Cs<sub>2</sub>CO<sub>3</sub> (260.6 mg, 0.8 mmol) in DCE (2 mL) at 95 °C for 6 h, isolated by column chromatography (silica gel, petroleum ether/AcOEt = 10/1), affords 47.9 mg (93%) of **3f** as white solid.

**<sup>1</sup>H NMR (400 MHz, CDCl<sub>3</sub>):** δ 8.46 (d, *J* = 7.6 Hz, 1H), 8.31 (s, 1H), 7.57 (d, *J* = 7.2 Hz, 1H), 7.47 (t, *J* = 7.6 Hz, 1H), 7.43 (dd, *J* = 9.2, 1.6 Hz, 1H), 7.30 (d, *J* = 8.8 Hz, 1H), 3.73 (s, 3H), 2.87 (s, 3H).

**<sup>13</sup>C NMR (100 MHz, CDCl<sub>3</sub>):** δ 161.5, 137.0, 136.7, 134.5, 131.7, 128.3, 127.8, 127.4, 127.33, 127.26, 127.0, 121.9, 115.9, 30.4, 25.8.

**HRMS *m/z* (ESI)** calcd for C<sub>15</sub>H<sub>13</sub>ClNO [M+H]<sup>+</sup> 258.0680, found: 258.0683.

5,10-dimethyl-2-(trifluoromethoxy)phenanthridin-6(5*H*)-one (**3g**)

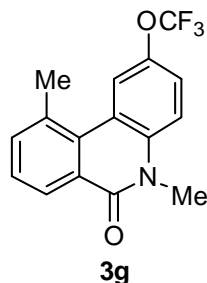

The reaction of 1-iodo-2-methylbenzene (**1a**) (43.6 mg, 0.2 mmol), methyl(4-(trifluoromethoxy)phenyl)carbamic chloride (**2g**) (101.5 mg, 0.4 mmol), Pd(OAc)<sub>2</sub> (4.5 mg, 0.02 mmol), PPh<sub>3</sub> (10.5 mg, 0.04 mmol), NBE (18.8 mg, 0.2 mmol), and Cs<sub>2</sub>CO<sub>3</sub> (260.6 mg, 0.8 mmol) in DCE (2 mL) at 95 °C for 6 h, isolated by column chromatography (silica gel, petroleum ether/AcOEt = 10/1), affords 51.6 mg (84%) of **3g** as white solid.

**<sup>1</sup>H NMR (400 MHz, CDCl<sub>3</sub>):** δ 8.48 (dd, *J* = 7.6, 0.8 Hz, 1H), 8.28 (s, 1H), 7.59 (d, *J* = 7.2 Hz, 1H), 7.49 (t, *J* = 7.6 Hz, 1H), 7.41 (d, *J* = 8.8 Hz, 1H), 7.37 (dd, *J* = 9.2, 1.6 Hz, 1H), 3.76 (s, 3H), 2.89 (s, 3H).

**<sup>13</sup>C NMR (100 MHz, CDCl<sub>3</sub>):** δ 161.6, 143.3 (d, *J* = 2.6 Hz), 137.1, 136.8, 134.5, 131.8, 128.0, 127.5, 127.4, 121.6, 121.2, 120.7 (q, *J* = 255.4 Hz), 120.4, 115.7, 30.5, 25.6.

**HRMS *m/z* (ESI)** calcd for C<sub>16</sub>H<sub>13</sub>F<sub>3</sub>NO<sub>2</sub> [M+H]<sup>+</sup> 308.0893, found: 308.0895.

5,10-dimethyl-6-oxo-5,6-dihydrophenanthridine-2-carbonitrile (**3h**)

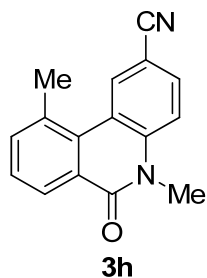

The reaction of 1-iodo-2-methylbenzene (**1a**) (43.6 mg, 0.2 mmol), (4-cyanophenyl)(methyl)carbamic chloride (**2h**) (77.9 mg, 0.4 mmol), Pd(OAc)<sub>2</sub> (4.5 mg, 0.02 mmol), PPh<sub>3</sub> (10.5 mg, 0.04 mmol), NBE (18.8 mg, 0.2 mmol), and Cs<sub>2</sub>CO<sub>3</sub> (260.6 mg, 0.8 mmol) in DCE (2 mL) at 95 °C for 12 h, isolated by column chromatography (silica gel, petroleum ether/AcOEt = 4/1), affords 14.8 mg (30%) of **3h** as white solid.

**<sup>1</sup>H NMR (400 MHz, CDCl<sub>3</sub>):** δ 8.65 (s, 1H), 8.47 (d, *J* = 7.6 Hz, 1H), 7.77 (dd, *J* = 8.4, 1.2 Hz, 1H), 7.65 (d, *J* = 7.2 Hz, 1H), 7.54 (t, *J* = 7.6 Hz, 1H), 7.48 (d, *J* = 8.4 Hz, 1H), 3.78 (s, 3H), 2.92 (s, 3H).

**<sup>13</sup>C NMR (100 MHz, CDCl<sub>3</sub>):** δ 161.7, 141.2, 137.5, 134.6, 131.8, 131.6, 131.2, 128.5, 127.5, 127.3, 121.2, 119.0, 115.5, 105.0, 30.6, 25.7.

**HRMS *m/z* (ESI)** calcd for C<sub>16</sub>H<sub>13</sub>N<sub>2</sub>O [M+H]<sup>+</sup> 249.1022, found: 249.1020.



5-ethyl-10-methylphenanthridin-6(5H)-one (**3i**)

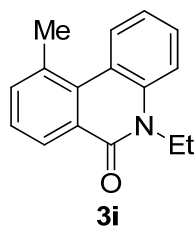

The reaction of 1-iodo-2-methylbenzene (**1a**) (43.6 mg, 0.2 mmol), ethyl(phenyl)carbamic chloride (**2i**) (73.5 mg, 0.4 mmol), Pd(OAc)<sub>2</sub> (4.5 mg, 0.02 mmol), PPh<sub>3</sub> (10.5 mg, 0.04 mmol), NBE (18.8 mg, 0.2 mmol), and Cs<sub>2</sub>CO<sub>3</sub> (260.6 mg, 0.8 mmol) in DCE (2 mL) at 95 °C for 6 h, isolated by column chromatography (silica gel, petroleum ether/AcOEt = 20/1), affords 46.6 mg (98%) of **3i** as white solid.

**<sup>1</sup>H NMR (400 MHz, CDCl<sub>3</sub>):** δ 8.52 (d, *J* = 7.6 Hz, 1H), 8.43 (d, *J* = 8.4 Hz, 1H), 7.58 (d, *J* = 7.2 Hz, 1H), 7.52 (td, *J* = 7.8, 1.2 Hz, 1H), 7.44-7.48 (m, 2H), 7.27 (td, *J* = 7.6, 1.2 Hz, 1H), 4.45 (q, *J* = 7.2 Hz, 2H), 2.92 (s, 3H), 1.43 (t, *J* = 7.2 Hz, 3H).

**<sup>13</sup>C NMR (100 MHz, CDCl<sub>3</sub>):** δ 161.4, 137.1, 136.8, 134.3, 133.0, 128.6, 128.0, 127.3, 127.1, 121.3, 121.0, 114.6, 38.0, 26.0, 12.6.

**HRMS *m/z* (ESI)** calcd for C<sub>16</sub>H<sub>16</sub>NO [M+H]<sup>+</sup> 238.1226, found: 238.1229.

5-butyl-10-methylphenanthridin-6(5H)-one (**3j**)

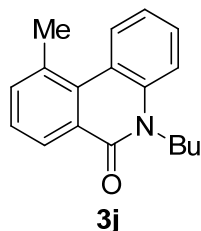

The reaction of 1-iodo-2-methylbenzene (**1a**) (43.6 mg, 0.2 mmol), butyl(phenyl)carbamic chloride (**2j**) (84.7 mg, 0.4 mmol), Pd(OAc)<sub>2</sub> (4.5 mg, 0.02 mmol), PPh<sub>3</sub> (10.5 mg, 0.04 mmol), NBE (18.8 mg, 0.2 mmol), and Cs<sub>2</sub>CO<sub>3</sub> (260.6 mg, 0.8 mmol) in DCE (2 mL) at 95 °C for 6 h, isolated by column chromatography (silica gel, petroleum ether/AcOEt = 40/1), affords 49.4 mg (93%) of **3j** as white solid.

**<sup>1</sup>H NMR (400 MHz, CDCl<sub>3</sub>):** δ 8.53 (dd, *J* = 7.8, 1.0 Hz, 1H), 8.45 (d, *J* = 8.0 Hz, 1H), 7.59 (dd, *J* = 7.6, 0.8 Hz, 1H), 7.53 (ddd, *J* = 8.4, 7.6, 1.2 Hz, 1H), 7.47 (t, *J* = 7.6 Hz, 1H), 7.44 (dd, *J* = 8.4, 1.2 Hz, 1H), 7.28 (ddd, *J* = 8.4, 7.2, 1.2 Hz, 1H), 4.38 (t, *J* = 8.0 Hz, 2H), 2.94 (s, 3H), 1.81 (tt, *J* = 7.6, 7.6 Hz, 2H), 1.52 (tq, *J* = 7.6, 7.6 Hz, 2H), 1.02 (t, *J* = 7.2 Hz, 3H).

**<sup>13</sup>C NMR (100 MHz, CDCl<sub>3</sub>):** δ 161.7, 137.4, 136.9, 134.4, 133.1, 128.7, 128.1, 127.4, 127.32, 127.26, 121.4, 121.1, 114.9, 42.9, 29.4, 26.1, 20.4, 13.9.

**HRMS *m/z* (ESI)** calcd for C<sub>18</sub>H<sub>20</sub>NO [M+H]<sup>+</sup> 266.1539, found: 266.1542.

5-isopentyl-10-methylphenanthridin-6(5H)-one (**3k**)

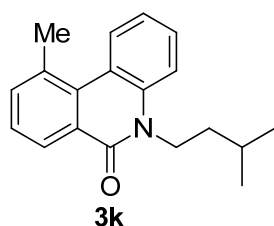

The reaction of 1-iodo-2-methylbenzene (**1a**) (43.6 mg, 0.2 mmol), isopentyl(phenyl)carbamic chloride (**2k**) (90.3 mg, 0.4 mmol), Pd(OAc)<sub>2</sub> (4.5 mg, 0.02 mmol), PPh<sub>3</sub> (10.5 mg, 0.04 mmol), NBE (18.8 mg, 0.2 mmol), and Cs<sub>2</sub>CO<sub>3</sub> (260.6 mg, 0.8 mmol) in DCE (2 mL) at 95 °C for 6 h, isolated by column chromatography (silica gel, petroleum ether/AcOEt = 40/1), affords 54.2 mg (97%) of **3k** as white solid.

**<sup>1</sup>H NMR (400 MHz, CDCl<sub>3</sub>):** δ 8.52 (dd, *J* = 7.8, 1.0 Hz, 1H), 8.45 (d, *J* = 7.6 Hz, 1H), 7.59 (dd, *J* = 7.4, 0.6 Hz, 1H), 7.53 (ddd, *J* = 8.4, 7.6, 1.2 Hz, 1H), 7.47 (t, *J* = 7.6 Hz, 1H), 7.44 (dd, *J* = 8.4, 0.8 Hz, 1H), 7.28 (ddd, *J* = 8.4, 7.2, 1.2 Hz, 1H), 4.40 (t, *J* = 8.0 Hz, 2H), 2.95 (s, 3H), 1.83 (heptet, *J* = 6.6 Hz, 1H), 1.71 (dt, *J* = 9.2, 7.2 Hz, 2H), 1.06 (d, *J* = 6.4 Hz, 6H).

**<sup>13</sup>C NMR (100 MHz, CDCl<sub>3</sub>):** δ 161.5, 137.3, 136.7, 134.2, 133.0, 128.6, 128.0, 127.3, 127.1 (2C), 121.2, 121.0, 114.7, 41.6, 35.8, 26.6, 26.0, 22.5 (2C).

**HRMS *m/z* (ESI)** calcd for C<sub>19</sub>H<sub>22</sub>NO [M+H]<sup>+</sup> 280.1696, found: 280.1702; calcd for C<sub>19</sub>H<sub>21</sub>NNaO [M+Na]<sup>+</sup> 302.1515, found: 302.1522.

#### 10-methyl-5-phenylphenanthridin-6(5H)-one (**3l**)

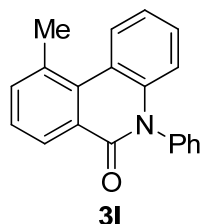

The reaction of 1-iodo-2-methylbenzene (**1a**) (43.6 mg, 0.2 mmol), diphenylcarbonyl chloride (**2l**) (92.7 mg, 0.4 mmol), Pd(OAc)<sub>2</sub> (4.5 mg, 0.02 mmol), PPh<sub>3</sub> (10.5 mg, 0.04 mmol), NBE (18.8 mg, 0.2 mmol), and Cs<sub>2</sub>CO<sub>3</sub> (260.6 mg, 0.8 mmol) in DCE (2 mL) at 95 °C for 6 h, isolated by column chromatography (silica gel, petroleum ether/AcOEt = 10/1), affords 54.2 mg (95%) of **3l** as white solid.

**<sup>1</sup>H NMR (400 MHz, CDCl<sub>3</sub>):** δ 8.53 (d, *J* = 8.0 Hz, 1H), 8.45 (dd, *J* = 7.8, 0.8 Hz, 1H), 7.58-7.64 (m, 3H), 7.52 (t, *J* = 7.6 Hz, 1H), 7.49 (t, *J* = 7.6 Hz, 1H), 7.32 (d, *J* = 7.6 Hz, 2H), 7.26 (tt, *J* = 5.2, 5.2 Hz, 2H), 6.73 (dd, *J* = 7.2, 1.6 Hz, 1H), 2.98 (s, 3H).

**<sup>13</sup>C NMR (100 MHz, CDCl<sub>3</sub>):** δ 161.8, 139.3, 138.4, 137.2, 134.5, 133.3, 130.1, 129.0, 128.6, 128.1, 127.54, 127.46, 127.36, 127.35, 121.7, 120.5, 116.8, 26.0.

**HRMS *m/z* (ESI)** calcd for C<sub>20</sub>H<sub>16</sub>NO [M+H]<sup>+</sup> 286.1226, found: 286.1232.

#### 5,10-dimethylbenzo[*c*]phenanthridin-6(5H)-one (**3m**)

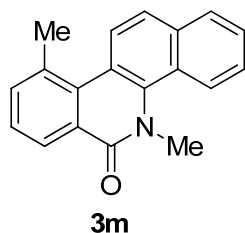

The reaction of 1-iodo-2-methylbenzene (**1a**) (43.6 mg, 0.2 mmol), methyl(naphthalen-1-yl)carbamic chloride (**2m**) (87.9 mg, 0.4 mmol), Pd(OAc)<sub>2</sub> (4.5 mg, 0.02 mmol), PPh<sub>3</sub> (10.5 mg, 0.04 mmol), NBE (18.8 mg, 0.2 mmol), and Cs<sub>2</sub>CO<sub>3</sub> (260.6 mg, 0.8 mmol) in DCE (2 mL) at 95 °C for 6 h, isolated by column chromatography (silica gel, petroleum ether/AcOEt = 20/1), affords 36.0 mg (66%) of **3m** as white solid. The reaction in toluene (2 mL) affords 39.2 mg (72%) of **3m**.

**<sup>1</sup>H NMR (400 MHz, CDCl<sub>3</sub>):** δ 8.50 (d, *J* = 7.6 Hz, 1H), 8.38 (d, *J* = 8.8 Hz, 1H), 8.26 (d, *J* = 8.4 Hz, 1H), 7.86 (dd, *J* = 7.2, 1.2 Hz, 1H), 7.64 (d, *J* = 8.8 Hz, 1H), 7.58 (d, *J* = 7.2 Hz, 1H), 7.45-7.53 (m, 3H), 3.98 (s, 3H), 2.94 (s, 3H).

**<sup>13</sup>C NMR (100 MHz, CDCl<sub>3</sub>):** δ 164.7, 137.0, 136.8, 134.2, 133.8, 133.5, 127.9, 127.3, 127.0, 126.9, 126.4, 125.5, 124.5, 124.3, 124.0, 122.2, 118.8, 41.2, 25.8.

**HRMS *m/z* (ESI)** calcd for C<sub>19</sub>H<sub>16</sub>NO [M+H]<sup>+</sup> 274.1226, found: 274.1229.

12-methyl-5,6-dihydro-4H-phenanthridin-8(4H)-one (**3n**)

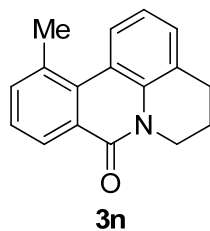

The reaction of 1-iodo-2-methylbenzene (**1a**) (43.6 mg, 0.2 mmol), 3,4-dihydroquinoline-1(2H)-carbonyl chloride (**2n**) (78.3 mg, 0.4 mmol), Pd(OAc)<sub>2</sub> (4.5 mg, 0.02 mmol), PPh<sub>3</sub> (10.5 mg, 0.04 mmol), NBE (18.8 mg, 0.2 mmol), and Cs<sub>2</sub>CO<sub>3</sub> (260.6 mg, 0.8 mmol) in toluene (2 mL) at 95 °C for 6 h, isolated by column chromatography (silica gel, petroleum ether/AcOEt = 10/1), affords 15.9 mg (32%) of **3n** as white solid.

**<sup>1</sup>H NMR (400 MHz, CDCl<sub>3</sub>):** δ 8.51 (dd, *J* = 8.0, 1.2 Hz, 1H), 8.27 (d, *J* = 8.0 Hz, 1H), 7.60 (d, *J* = 6.8 Hz, 1H), 7.48 (t, *J* = 8.0 Hz, 1H), 7.30 (dd, *J* = 7.2, 1.2 Hz, 1H), 7.19 (t, *J* = 8.0 Hz, 1H), 4.29 (t, *J* = 7.2 Hz, 2H), 3.05 (t, *J* = 6.2 Hz, 2H), 2.94 (s, 3H), 2.14 (tt, *J* = 7.2, 6.0 Hz, 2H).

**<sup>13</sup>C NMR (100 MHz, CDCl<sub>3</sub>):** δ 161.5, 136.7, 134.8, 134.4, 133.3, 128.8, 127.2, 127.1, 126.9, 126.1, 125.2, 120.9, 120.7, 43.3, 28.6, 26.0, 20.7.

**HRMS *m/z* (ESI)** calcd for C<sub>17</sub>H<sub>16</sub>NO [M+H]<sup>+</sup> 250.1226, found: 250.1230.

13-methyl-6,7-dihydro-4H-azepino[3,2,1-*de*]phenanthridin-9(5H)-one (**3o**)

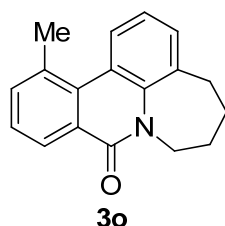

The reaction of 1-iodo-2-methylbenzene (**1a**) (43.6 mg, 0.2 mmol), 2,3,4,5-tetrahydro-1*H*-benzo[*b*]azepine-1-carbonyl chloride (**2o**) (83.9 mg, 0.4 mmol), Pd(OAc)<sub>2</sub> (4.5 mg, 0.02 mmol), PPh<sub>3</sub> (10.5 mg, 0.04 mmol), NBE (18.8 mg, 0.2 mmol), and Cs<sub>2</sub>CO<sub>3</sub> (260.6 mg, 0.8 mmol) in toluene (2 mL) at 95 °C for 6 h, isolated by column chromatography (silica gel, petroleum ether/AcOEt = 10/1), affords 48.9 mg (93%) of **3o** as white solid.

**<sup>1</sup>H NMR (400 MHz, CDCl<sub>3</sub>):** δ 8.44 (d, *J* = 7.6 Hz, 1H), 8.16 (d, *J* = 8.4 Hz, 1H), 7.55 (d, *J* = 7.2 Hz, 1H), 7.43 (t, *J* = 7.6 Hz, 1H), 7.23 (d, *J* = 7.2 Hz, 1H), 7.13 (t, *J* = 7.8 Hz, 1H), 4.38 (t, *J* = 5.6 Hz, 2H), 3.16 (t, *J* = 5.6 Hz, 2H), 2.89 (s, 3H), 2.15 (tt, *J* = 6.8, 6.4 Hz, 2H), 2.00 (tt, *J* = 6.8, 6.4 Hz, 2H).

**<sup>13</sup>C NMR (100 MHz, CDCl<sub>3</sub>):** δ 163.1, 138.9, 136.6, 134.1, 133.8, 131.6, 130.7, 127.5, 126.9, 126.6, 125.4, 122.4, 121.6, 46.2, 33.5, 25.7, 25.6, 23.7.

**HRMS *m/z* (ESI)** calcd for C<sub>18</sub>H<sub>18</sub>NO [M+H]<sup>+</sup> 264.1383, found: 264.1387.

15-methyl-11*H*-benzo[6,7]azepino[3,2,1-*de*]phenanthridin-11-one (**3p**)

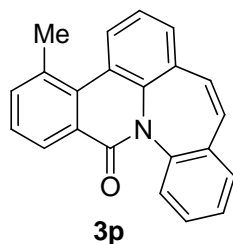

The reaction of 1-iodo-2-methylbenzene (**1a**) (43.6 mg, 0.2 mmol), 5*H*-dibenzo[*b,f*]azepine-5-carbonyl chloride (**2p**) (102.3 mg, 0.4 mmol), Pd(OAc)<sub>2</sub> (4.5 mg, 0.02 mmol), PPh<sub>3</sub> (10.5 mg, 0.04 mmol), NBE (18.8 mg, 0.2 mmol), and Cs<sub>2</sub>CO<sub>3</sub> (260.6 mg, 0.8 mmol) in toluene (2 mL) at 95 °C for 6 h, isolated by column chromatography (silica gel, petroleum ether/AcOEt = 10/1), affords 25.4 mg (41%) of **3p** as white solid.

**<sup>1</sup>H NMR (400 MHz, CDCl<sub>3</sub>):** δ 8.37 (d, *J* = 7.6 Hz, 1H), 8.02 (d, *J* = 8.0 Hz, 1H), 7.61 (d, *J* = 7.6 Hz, 1H), 7.45 (t, *J* = 7.6 Hz, 1H), 7.20-7.26 (m, 4H), 7.15 (d, *J* = 7.6 Hz, 1H), 6.80 (d, *J* = 11.6 Hz, 1H), 6.75 (d, *J* = 6.8 Hz, 1H), 6.62 (d, *J* = 11.2 Hz, 1H), 2.90 (s, 3H).

**<sup>13</sup>C NMR (100 MHz, CDCl<sub>3</sub>):** δ 167.5, 142.9, 142.8, 137.1, 134.8, 134.4, 134.2, 132.7, 131.3, 131.1, 130.7, 130.0, 129.9, 129.4, 129.0, 127.4, 127.2 (2C), 126.0, 124.9, 124.3, 24.1.

**HRMS *m/z* (ESI)** calcd for C<sub>22</sub>H<sub>16</sub>NO [M+H]<sup>+</sup> 310.1226, found: 310.1230.

4-methylbenzo[6,7][1,4]oxazepino[2,3,4-*de*]phenanthridin-8(10*H*)-one (**3q**)

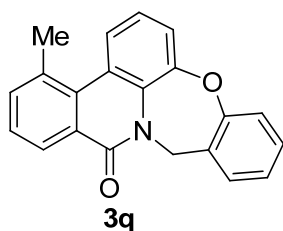

The reaction of 1-iodo-2-methylbenzene (**1a**) (43.6 mg, 0.2 mmol), dibenzo[*b,f*][1,4]oxazepine-10(11*H*)-carbonyl chloride (**2q**) (103.9 mg, 0.4 mmol), Pd(OAc)<sub>2</sub> (4.5 mg, 0.02 mmol), PPh<sub>3</sub> (10.5 mg, 0.04 mmol), NBE (18.8 mg, 0.2 mmol), and Cs<sub>2</sub>CO<sub>3</sub> (260.6 mg, 0.8 mmol) in toluene (2 mL) at 95 °C for 6 h, isolated by column chromatography (silica gel, petroleum ether/AcOEt = 20/1), affords 39.5 mg (69%) of **3q** as white solid.

**<sup>1</sup>H NMR (400 MHz, CDCl<sub>3</sub>):** δ 8.43 (dd, *J* = 8.0, 1.2 Hz, 1H), 8.03 (dd, *J* = 8.0, 1.2 Hz, 1H), 7.57 (dd, *J* = 7.6, 0.8 Hz, 1H), 7.53 (dd, *J* = 7.6, 1.2 Hz, 1H), 7.46 (t, *J* = 7.6 Hz, 1H), 7.43 (dd, *J* = 7.6, 1.6 Hz, 1H), 7.32 (td, *J* = 8.0, 1.6 Hz, 1H), 7.24 (dd, *J* = 8.0, 0.8 Hz, 1H), 7.18 (t, *J* = 8.0 Hz, 1H), 7.17 (td, *J* = 7.2, 1.2 Hz, 1H), 5.76 (s, 2H), 2.84 (s, 3H).

**<sup>13</sup>C NMR (100 MHz, CDCl<sub>3</sub>):** δ 158.9, 145.6, 136.8, 134.3, 133.5, 130.1, 129.9, 129.8, 129.1, 127.4, 127.1, 126.9, 125.4, 124.1, 123.3, 122.00, 121.95, 119.3, 44.0, 25.4.

**HRMS *m/z* (ESI)** calcd for C<sub>21</sub>H<sub>16</sub>NO<sub>2</sub> [M+H]<sup>+</sup> 314.1176, found: 314.1178.

10-methoxy-5-methylphenanthridin-6(5*H*)-one (**4b**)<sup>6</sup>

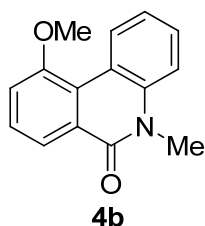

The reaction of 1-iodo-2-methoxybenzene (**1b**) (46.8 mg, 0.2 mmol), methyl(phenyl)carbamic chloride (**2a**) (67.9 mg, 0.4 mmol), Pd(OAc)<sub>2</sub> (4.5 mg, 0.02 mmol), PPh<sub>3</sub> (10.5 mg, 0.04 mmol), NBE (18.8 mg, 0.2 mmol), and Cs<sub>2</sub>CO<sub>3</sub> (260.6 mg, 0.8 mmol) in DCE (2 mL) at 95 °C for 6 h, isolated by column chromatography (silica gel, petroleum ether/AcOEt = 20/1), affords 27.9 mg (58%) of **4b** as white solid. The reaction in toluene (2 mL) affords 40.2 mg (84%) of **4b**.

**<sup>1</sup>H NMR (400 MHz, CDCl<sub>3</sub>):** δ 9.27 (d, *J* = 8.4 Hz, 1H), 8.26 (d, *J* = 8.0 Hz, 1H), 7.49-7.54 (m, 2H), 7.39 (d, *J* = 8.4 Hz, 1H), 7.28 (t, *J* = 8.4 Hz, 2H), 4.06 (s, 3H), 3.80 (s, 3H).

**<sup>13</sup>C NMR (100 MHz, CDCl<sub>3</sub>):** δ 161.4, 157.4, 137.6, 128.9, 128.6, 128.0, 127.7, 123.2, 122.2, 121.1, 119.2, 114.4, 114.3, 55.9, 30.3.

5-methyl-10-phenylphenanthridin-6(5*H*)-one (**4c**)

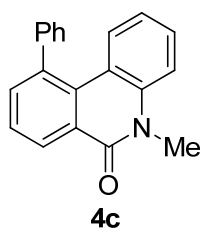

The reaction of 2-iodo-1,1'-biphenyl (**1c**) (56.0 mg, 0.2 mmol), methyl(phenyl)carbamic chloride

(**2a**) (67.9 mg, 0.4 mmol), Pd(OAc)<sub>2</sub> (4.5 mg, 0.02 mmol), PPh<sub>3</sub> (10.5 mg, 0.04 mmol), NBE (18.8 mg, 0.2 mmol), and Cs<sub>2</sub>CO<sub>3</sub> (260.6 mg, 0.8 mmol) in DCE (2 mL) at 95 °C for 6 h, isolated by column chromatography (silica gel, petroleum ether/AcOEt = 10/1), affords 46.2 mg (81%) of **4c** as white solid.

**<sup>1</sup>H NMR (400 MHz, CDCl<sub>3</sub>):** δ 8.62 (t, *J* = 7.6 Hz, 1H), 7.57 (d, *J* = 4.8 Hz, 2H), 7.42-7.47 (m, 3H), 7.34-7.38 (m, 5H), 6.77 (dt, *J* = 8.4, 4.0 Hz, 1H), 3.80 (s, 3H).

**<sup>13</sup>C NMR (100 MHz, CDCl<sub>3</sub>):** δ 161.7, 143.4, 139.4, 138.3, 136.2, 131.6, 129.1, 128.9, 128.8, 128.3, 127.4, 127.2, 127.1, 121.0, 119.4, 114.6, 30.3.

**HRMS *m/z* (ESI)** calcd for C<sub>20</sub>H<sub>16</sub>NO [M+H]<sup>+</sup> 286.1226, found: 286.1229.

#### 10-fluoro-5-methylphenanthridin-6(5*H*)-one (**4d**)

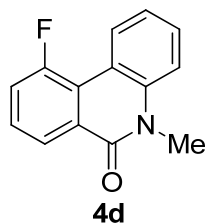

The reaction of 1-fluoro-2-iodobenzene (**1d**) (44.4 mg, 0.2 mmol), methyl(phenyl)carbamic chloride (**2a**) (67.9 mg, 0.4 mmol), Pd(OAc)<sub>2</sub> (4.5 mg, 0.02 mmol), PPh<sub>3</sub> (10.5 mg, 0.04 mmol), NBE (18.8 mg, 0.2 mmol), and Cs<sub>2</sub>CO<sub>3</sub> (260.6 mg, 0.8 mmol) in DCE (2 mL) at 95 °C for 6 h, isolated by column chromatography (silica gel, petroleum ether/AcOEt = 10/1), affords 27.2 mg (60%) of **4d** as white solid. The reaction in toluene (2 mL) affords 39.5 mg (87%) of **4d**.

**<sup>1</sup>H NMR (400 MHz, CDCl<sub>3</sub>):** δ 8.71 (ddd, *J* = 8.4, 3.6, 1.2 Hz, 1H), 8.41 (dd, *J* = 8.0, 1.2 Hz, 1H), 7.44-7.58 (m, 3H), 7.42 (d, *J* = 8.0 Hz, 1H), 7.32 (tt, *J* = 7.6, 0.8 Hz, 1H), 3.80 (s, 3H).

**<sup>13</sup>C NMR (100 MHz, CDCl<sub>3</sub>):** δ 160.6 (d, *J* = 3.4 Hz), 159.9 (d, *J* = 252.4 Hz), 137.8, 129.7 (d, *J* = 2.1 Hz), 128.2, 128.0 (d, *J* = 15.4 Hz), 127.9 (d, *J* = 3.1 Hz), 124.9 (d, *J* = 2.7 Hz), 122.8 (d, *J* = 1.8 Hz), 122.4 (d, *J* = 9.0 Hz), 119.8 (d, *J* = 24.8 Hz), 117.0 (d, *J* = 5.2 Hz), 114.7, 30.3.

**HRMS *m/z* (ESI)** calcd for C<sub>14</sub>H<sub>11</sub>FN O [M+H]<sup>+</sup> 228.0819, found: 228.0820.

#### 10-chloro-5-methylphenanthridin-6(5*H*)-one (**4e**)

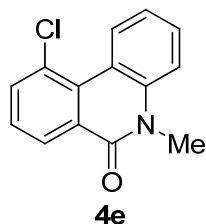

The reaction of 1-chloro-2-iodobenzene (**1e**) (47.7 mg, 0.2 mmol), methyl(phenyl)carbamic chloride (**2a**) (67.9 mg, 0.4 mmol), Pd(OAc)<sub>2</sub> (4.5 mg, 0.02 mmol), PPh<sub>3</sub> (10.5 mg, 0.04 mmol), NBE (18.8 mg, 0.2 mmol), and Cs<sub>2</sub>CO<sub>3</sub> (260.6 mg, 0.8 mmol) in DCE (2 mL) at 95 °C for 6 h, isolated by column chromatography (silica gel, petroleum ether/AcOEt = 10/1), affords 42.5 mg (87%) of **4e** as white solid.

**<sup>1</sup>H NMR (400 MHz, CDCl<sub>3</sub>):** δ 9.43 (d, *J* = 8.4 Hz, 1H), 8.58 (d, *J* = 7.6 Hz, 1H), 7.80 (d, *J* = 7.6 Hz, 1H), 7.57 (t, *J* = 7.6 Hz, 1H), 7.46 (t, *J* = 7.8 Hz, 1H), 7.42 (d, *J* = 8.4 Hz, 1H), 7.31 (t, *J* = 7.8 Hz, 1H), 3.78 (s, 3H).

$^{13}\text{C}$  NMR (100 MHz,  $\text{CDCl}_3$ ):  $\delta$  160.8, 138.2, 136.3, 130.8, 130.3, 129.9, 128.7, 128.3, 127.7 (2C), 121.8, 118.5, 114.7, 30.5.

HRMS  $m/z$  (ESI) calcd for  $\text{C}_{14}\text{H}_{11}\text{ClNO}$   $[\text{M}+\text{H}]^+$  244.0524, found: 244.0524.

5-methyl-10-(trifluoromethoxy)phenanthridin-6(5H)-one (**4f**)

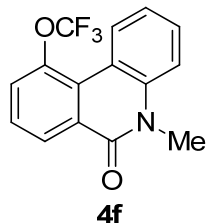

The reaction of 1-iodo-2-(trifluoromethoxy)benzene (**1f**) (57.6 mg, 0.2 mmol), methyl(phenyl)carbamic chloride (**2a**) (67.9 mg, 0.4 mmol),  $\text{Pd}(\text{OAc})_2$  (4.5 mg, 0.02 mmol),  $\text{PPh}_3$  (10.5 mg, 0.04 mmol), NBE (18.8 mg, 0.2 mmol), and  $\text{Cs}_2\text{CO}_3$  (260.6 mg, 0.8 mmol) in DCE (2 mL) at 95 °C for 6 h, isolated by column chromatography (silica gel, petroleum ether/AcOEt = 15/1), affords 50.3 mg (86%) of **4f** as white solid.

$^1\text{H}$  NMR (400 MHz,  $\text{CDCl}_3$ ):  $\delta$  8.87 (d,  $J = 8.4$  Hz, 1H), 8.60 (d,  $J = 8.0$  Hz, 1H), 7.67 (d,  $J = 8.0$  Hz, 2H), 7.57 (t,  $J = 7.6$  Hz, 1H), 7.43 (d,  $J = 8.4$  Hz, 1H), 7.32 (t,  $J = 7.6$  Hz, 1H), 3.80 (s, 3H).

$^{13}\text{C}$  NMR (100 MHz,  $\text{CDCl}_3$ ):  $\delta$  160.4, 145.6 (d,  $J = 1.9$  Hz), 138.2, 130.1, 128.3, 128.1, 127.82, 127.78, 126.9, 126.0, 122.8, 120.6 (q,  $J = 257.3$  Hz), 117.1, 114.9, 30.4.

HRMS  $m/z$  (ESI) calcd for  $\text{C}_{15}\text{H}_{11}\text{F}_3\text{NO}_2$   $[\text{M}+\text{H}]^+$  294.0736, found: 294.0737.

5-methyl-10-(trifluoromethyl)phenanthridin-6(5H)-one (**4g**)

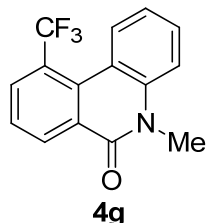

The reaction of 1-iodo-2-(trifluoromethyl)benzene (**1g**) (54.4 mg, 0.2 mmol), methyl(phenyl)carbamic chloride (**2a**) (67.9 mg, 0.4 mmol),  $\text{Pd}(\text{OAc})_2$  (4.5 mg, 0.02 mmol),  $\text{PPh}_3$  (10.5 mg, 0.04 mmol), NBE (18.8 mg, 0.2 mmol), and  $\text{Cs}_2\text{CO}_3$  (260.6 mg, 0.8 mmol) in DCE (2 mL) at 95 °C for 6 h, isolated by column chromatography (silica gel, petroleum ether/AcOEt = 12/1), affords 39.8 mg (72%) of **4g** as white solid.

$^1\text{H}$  NMR (400 MHz,  $\text{CDCl}_3$ ):  $\delta$  8.82 (d,  $J = 8.0$  Hz, 1H), 8.36 (d,  $J = 8.4$  Hz, 1H), 8.16 (d,  $J = 7.6$  Hz, 1H), 7.67 (t,  $J = 7.6$  Hz, 1H), 7.59 (t,  $J = 7.6$  Hz, 1H), 7.43 (d,  $J = 8.4$  Hz, 1H), 7.31 (t,  $J = 7.6$  Hz, 1H), 3.79 (s, 3H).

$^{13}\text{C}$  NMR (100 MHz,  $\text{CDCl}_3$ ):  $\delta$  160.8, 138.3, 133.2, 132.9, 132.5 (q,  $J = 6.7$  Hz), 130.4, 129.0 (q,  $J = 7.5$  Hz), 128.4, 127.0, 125.4 (q,  $J = 28.4$  Hz), 124.8 (q,  $J = 271.5$  Hz), 122.1, 117.6, 114.6, 30.5.

HRMS  $m/z$  (ESI) calcd for  $\text{C}_{15}\text{H}_{11}\text{F}_3\text{NO}$   $[\text{M}+\text{H}]^+$  278.0787, found: 278.0785.

7,8-dimethoxy-5,10-dimethylphenanthridin-6(5H)-one (**4h**)

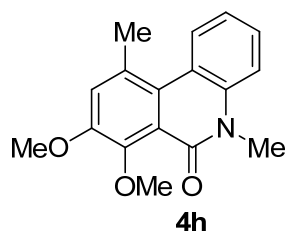

The reaction of 1-iodo-4,5-dimethoxy-2-methylbenzene (**1h**) (55.6 mg, 0.2 mmol), methyl(phenyl)carbamic chloride (**2a**) (67.9 mg, 0.4 mmol), Pd(OAc)<sub>2</sub> (4.5 mg, 0.02 mmol), PPh<sub>3</sub> (10.5 mg, 0.04 mmol), NBE (18.8 mg, 0.2 mmol), and Cs<sub>2</sub>CO<sub>3</sub> (260.6 mg, 0.8 mmol) in DCE (2 mL) at 95 °C for 6 h, isolated by column chromatography (silica gel, petroleum ether/AcOEt = 3/1), affords 27.3 mg (48%) of **4h** as white solid. The reaction in toluene (2 mL) affords 43.6 mg (77%) of **4h**.

**<sup>1</sup>H NMR (400 MHz, CDCl<sub>3</sub>):** δ 8.13 (d, *J* = 8.4 Hz, 1H), 7.43 (td, *J* = 7.8, 1.2 Hz, 1H), 7.32 (d, *J* = 8.4 Hz, 1H), 7.20 (td, *J* = 7.6, 0.8 Hz, 1H), 7.19 (s, 1H), 4.01 (s, 3H), 3.96 (s, 3H), 3.69 (s, 3H), 2.84 (s, 3H).

**<sup>13</sup>C NMR (100 MHz, CDCl<sub>3</sub>):** δ 160.3, 151.7, 148.4, 137.5, 130.2, 127.8, 127.6, 127.3, 121.4, 121.2, 121.0, 120.2, 114.0, 61.5, 56.3, 30.1, 25.6.

**HRMS *m/z* (ESI)** calcd for C<sub>17</sub>H<sub>18</sub>NO<sub>3</sub> [M+H]<sup>+</sup> 284.1281, found: 284.1280.

8-fluoro-5,10-dimethylphenanthridin-6(5*H*)-one (**4i**)

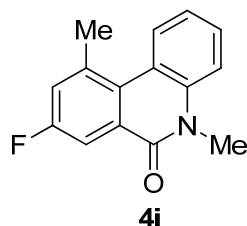

The reaction of 4-fluoro-1-iodo-2-methylbenzene (**1i**) (47.2 mg, 0.2 mmol), methyl(phenyl)carbamic chloride (**2a**) (67.9 mg, 0.4 mmol), Pd(OAc)<sub>2</sub> (4.5 mg, 0.02 mmol), PPh<sub>3</sub> (10.5 mg, 0.04 mmol), NBE (18.8 mg, 0.2 mmol), and Cs<sub>2</sub>CO<sub>3</sub> (260.6 mg, 0.8 mmol) in DCE (2 mL) at 95 °C for 6 h, isolated by column chromatography (silica gel, petroleum ether/AcOEt = 20/1), affords 46.5 mg (96%) of **4i** as white solid.

**<sup>1</sup>H NMR (400 MHz, CDCl<sub>3</sub>):** δ 8.29 (d, *J* = 8.4 Hz, 1H), 8.10 (dd, *J* = 8.8, 2.8 Hz, 1H), 7.49 (t, *J* = 7.6 Hz, 1H), 7.37 (d, *J* = 8.4 Hz, 1H), 7.24-7.28 (m, 2H), 3.73 (s, 3H), 2.87 (s, 3H).

**<sup>13</sup>C NMR (100 MHz, CDCl<sub>3</sub>):** δ 160.9 (d, *J* = 3.4 Hz), 160.8 (d, *J* = 246.8 Hz), 137.7 (d, *J* = 6.9 Hz), 137.5, 129.4 (d, *J* = 2.0 Hz), 129.1 (d, *J* = 8.3 Hz), 128.4, 127.1, 124.1 (d, *J* = 22.1 Hz), 121.7, 120.0, 114.8, 112.5 (d, *J* = 22.0 Hz), 30.4, 26.0.

**HRMS *m/z* (ESI)** calcd for C<sub>15</sub>H<sub>13</sub>FNO [M+H]<sup>+</sup> 242.0976, found: 242.0977.

methyl 5,10-dimethyl-6-oxo-5,6-dihydrophenanthridine-8-carboxylate (**4j**)



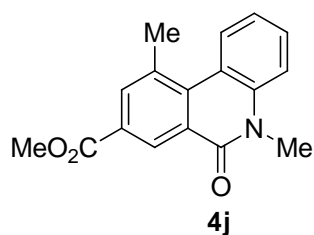

The reaction of methyl 4-iodo-3-methylbenzoate (**1j**) (55.2 mg, 0.2 mmol), methyl(phenyl)carbamoyl chloride (**2a**) (67.9 mg, 0.4 mmol), Pd(OAc)<sub>2</sub> (4.5 mg, 0.02 mmol), PPh<sub>3</sub> (10.5 mg, 0.04 mmol), NBE (18.8 mg, 0.2 mmol), and Cs<sub>2</sub>CO<sub>3</sub> (260.6 mg, 0.8 mmol) in DCE (2 mL) at 95 °C for 6 h, isolated by column chromatography (silica gel, petroleum ether/AcOEt = 5/1), affords 54.1 mg (96%) of **4j** as white solid.

**<sup>1</sup>H NMR (400 MHz, CDCl<sub>3</sub>):** δ 9.00 (s, 1H), 8.35 (*J* = 8.0 Hz, 1H), 8.11 (s, 1H), 7.53 (t, *J* = 7.6 Hz, 1H), 7.36 (d, *J* = 8.0 Hz, 1H), 7.26 (t, *J* = 7.6 Hz, 1H), 3.95 (s, 3H), 3.72 (s, 3H), 2.90 (s, 3H).

**<sup>13</sup>C NMR (100 MHz, CDCl<sub>3</sub>):** δ 166.2, 161.2, 138.8, 136.5, 136.4, 134.8, 129.6, 128.7, 128.1 (2C), 127.1, 121.7, 119.8, 114.8, 52.1, 30.3, 25.9.

**HRMS *m/z* (ESI)** calcd for C<sub>17</sub>H<sub>16</sub>NO<sub>3</sub> [M+H]<sup>+</sup> 282.1125, found: 282.1122.

5-methylbenzo[*k*]phenanthridin-6(5*H*)-one (**4k**)<sup>4,7</sup>

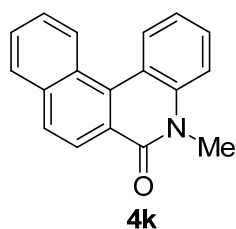

The reaction of 1-iodonaphthalene (**1k**) (50.8 mg, 0.2 mmol), methyl(phenyl)carbamoyl chloride (**2a**) (67.9 mg, 0.4 mmol), Pd(OAc)<sub>2</sub> (4.5 mg, 0.02 mmol), PPh<sub>3</sub> (10.5 mg, 0.04 mmol), NBE (18.8 mg, 0.2 mmol), and Cs<sub>2</sub>CO<sub>3</sub> (260.6 mg, 0.8 mmol) in DCE (2 mL) at 95 °C for 6 h, isolated by column chromatography (silica gel, petroleum ether/AcOEt = 10/1), affords 46.7 mg (90%) of **4k** as white solid.

**<sup>1</sup>H NMR (400 MHz, CDCl<sub>3</sub>):** δ 8.79 (d, *J* = 8.0 Hz, 1H), 8.55 (d, *J* = 8.0 Hz, 1H), 8.46 (d, *J* = 8.4 Hz, 1H), 7.95 (dd, *J* = 8.0, 2.0 Hz, 1H), 7.89 (d, *J* = 8.8 Hz, 1H), 7.62 (ttd, *J* = 6.8, 6.8, 1.2 Hz, 2H), 7.54 (t, *J* = 7.6 Hz, 1H), 7.45 (d, *J* = 8.4 Hz, 1H), 7.30 (t, *J* = 7.6 Hz, 1H), 3.80 (s, 3H).

**<sup>13</sup>C NMR (100 MHz, CDCl<sub>3</sub>):** δ 161.7, 138.3, 136.1, 132.5, 129.0, 128.74, 128.72, 128.45, 128.41, 127.7, 127.6, 126.6, 124.4, 123.8, 121.8, 119.4, 114.7, 30.3.

1-methoxy-6-methylbenzo[*c*][2,6]naphthyridin-5(6*H*)-one (**4l**)

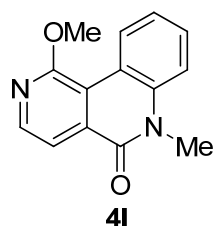

The reaction of 3-iodo-2-methoxypyridine (**1l**) (47.0 mg, 0.2 mmol), methyl(phenyl)carbamoyl chloride (**2a**) (67.9 mg, 0.4 mmol), Pd(OAc)<sub>2</sub> (4.5 mg, 0.02 mmol), PPh<sub>3</sub> (10.5 mg, 0.04 mmol),

NBE (18.8 mg, 0.2 mmol), and Cs<sub>2</sub>CO<sub>3</sub> (260.6 mg, 0.8 mmol) in DCE (2 mL) at 95 °C for 6 h, isolated by column chromatography (silica gel, petroleum ether/AcOEt = 15/1), affords 38.0 mg (79%) of **4l** as white solid.

**<sup>1</sup>H NMR (400 MHz, CDCl<sub>3</sub>):** δ 9.17 (dd, *J* = 8.4, 1.2 Hz, 1H), 8.29 (d, *J* = 5.2 Hz, 1H), 7.98 (d, *J* = 5.2 Hz, 1H), 7.56 (ddd, *J* = 8.4, 7.2, 1.6 Hz, 1H), 7.43 (d, *J* = 7.6 Hz, 1H), 7.34 (ddd, *J* = 8.4, 7.2, 1.2 Hz, 1H), 4.22 (s, 3H), 3.82 (s, 3H).

**<sup>13</sup>C NMR (100 MHz, CDCl<sub>3</sub>):** δ 161.0, 144.0, 138.0, 134.1, 129.4, 128.6, 122.8, 117.9, 117.5, 114.7, 114.4, 54.2, 30.4.

**HRMS *m/z* (ESI)** calcd for C<sub>14</sub>H<sub>13</sub>N<sub>2</sub>O<sub>2</sub> [M+H]<sup>+</sup> 241.0972, found: 241.0974.

5-methylbenzo[4,5]thieno[2,3-*c*]quinolin-6(5*H*)-one (**4m**)

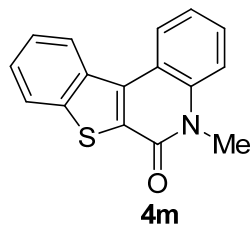

The reaction of 3-iodobenzo[*b*]thiophene (**1m**) (52.0 mg, 0.2 mmol), methyl(phenyl)carbamic chloride (**2a**) (67.9 mg, 0.4 mmol), Pd(OAc)<sub>2</sub> (4.5 mg, 0.02 mmol), PPh<sub>3</sub> (10.5 mg, 0.04 mmol), NBE (18.8 mg, 0.2 mmol), and Cs<sub>2</sub>CO<sub>3</sub> (260.6 mg, 0.8 mmol) in toluene (2 mL) at 110 °C for 12 h, isolated by column chromatography (silica gel, petroleum ether/AcOEt = 6/1), further purified by recrystallization, affords 29.6 mg (56%) of **4m** as white solid.

**<sup>1</sup>H NMR (400 MHz, CDCl<sub>3</sub>):** δ 8.57-8.60 (m, 2H), 7.96-7.98 (m, 1H), 7.50-7.57 (m, 3H), 7.48 (d, *J* = 8.4 Hz, 1H), 7.36 (td, *J* = 7.6, 1.0 Hz, 1H), 3.84 (s, 3H).

**<sup>13</sup>C NMR (100 MHz, CDCl<sub>3</sub>):** δ 158.4, 142.6, 138.5, 135.8, 135.0, 132.8, 128.5, 126.9, 125.4, 125.2, 123.9, 123.7, 122.4, 119.4, 115.3, 29.9.

**HRMS *m/z* (ESI)** calcd for C<sub>16</sub>H<sub>12</sub>NOS [M+H]<sup>+</sup> 266.0634, found: 266.0637.

5-(4-methoxybenzyl)-10-methylphenanthridin-6(5*H*)-one (**3r**)

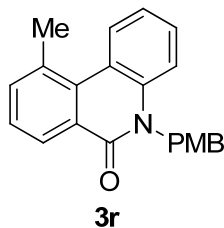

The reaction of 1-iodo-2-methylbenzene (**1a**) (43.6 mg, 0.2 mmol), (4-methoxybenzyl)(phenyl)carbamic chloride (**2r**) (110.3 mg, 0.4 mmol), Pd(OAc)<sub>2</sub> (4.5 mg, 0.02 mmol), PPh<sub>3</sub> (10.5 mg, 0.04 mmol), NBE (18.8 mg, 0.2 mmol), and Cs<sub>2</sub>CO<sub>3</sub> (260.6 mg, 0.8 mmol) in toluene (2 mL) at 95 °C for 6 h, isolated by column chromatography (silica gel, petroleum ether/AcOEt = 8/1), affords 60.4 mg (92%) of **3r** as white solid.

**<sup>1</sup>H NMR (400 MHz, CDCl<sub>3</sub>):** δ 8.59 (d, *J* = 7.6 Hz, 1H), 8.39 (d, *J* = 8.0 Hz, 1H), 7.59 (d, *J* = 7.2 Hz, 1H), 7.47 (t, *J* = 7.6 Hz, 1H), 7.346-7.354 (m, 2H), 7.18-7.23 (m, 3H), 6.80 (d, *J* = 8.4 Hz, 2H), 5.56 (s, 2H), 3.71 (s, 3H), 2.91 (s, 3H).

**<sup>13</sup>C NMR (100 MHz, CDCl<sub>3</sub>):** δ 162.1, 158.6, 137.4, 137.0, 134.4, 133.2, 128.6, 128.5, 127.8,

127.5, 127.2, 127.1, 121.5, 120.9, 115.7, 114.1, 55.1, 46.1, 26.0.

**HRMS *m/z* (ESI)** calcd for C<sub>22</sub>H<sub>20</sub>NO<sub>2</sub> [M+H]<sup>+</sup> 330.1489, found: 330.1496.

5-benzyl-10-methylphenanthridin-6(5*H*)-one (**3s**)

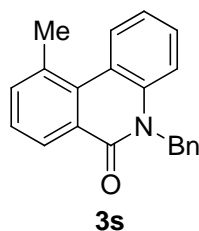

The reaction of 1-iodo-2-methylbenzene (**1a**) (43.6 mg, 0.2 mmol), benzyl(phenyl)carbamic chloride (**2s**) (98.3 mg, 0.4 mmol), Pd(OAc)<sub>2</sub> (4.5 mg, 0.02 mmol), PPh<sub>3</sub> (10.5 mg, 0.04 mmol), NBE (18.8 mg, 0.2 mmol), and Cs<sub>2</sub>CO<sub>3</sub> (260.6 mg, 0.8 mmol) in toluene (2 mL) at 95 °C for 6 h, isolated by column chromatography (silica gel, petroleum ether/AcOEt = 10/1), affords 59.4 mg (99%) of **3s** as white solid.

**<sup>1</sup>H NMR (400 MHz, CDCl<sub>3</sub>):** δ 8.60 (d, *J* = 8.0 Hz, 1H), 8.42 (d, *J* = 8.0 Hz, 1H), 7.61 (d, *J* = 7.2 Hz, 1H), 7.49 (t, *J* = 7.6 Hz, 1H), 7.21-7.37 (m, 8H), 5.64 (s, 2H), 2.93 (s, 3H).

**<sup>13</sup>C NMR (100 MHz, CDCl<sub>3</sub>):** δ 164.7, 137.4, 137.1, 136.5, 134.4, 133.2, 128.7, 128.5, 127.8, 127.5, 127.2, 127.0, 126.4, 121.6, 120.9, 115.7, 46.7, 26.0.

**HRMS *m/z* (ESI)** calcd for C<sub>21</sub>H<sub>18</sub>NO [M+H]<sup>+</sup> 300.1383, found: 300.1388.

10-methylphenanthridin-6(5*H*)-one (**5**)<sup>8</sup>

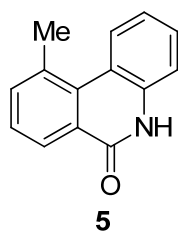

**3r** (65.9 mg, 0.2 mmol) and trifluoroacetic acid (2.0 mL) were added to a 5 mL screw vial with a magnetic stir bar. The vial was capped and the mixture was stirred at 90 °C for 20 h. After cooling to room temperature, the mixture was evaporated and isolated by column chromatography (silica gel, petroleum ether/AcOEt = 2/1), affords 38.2 mg (91%) of **5** as white solid.

**<sup>1</sup>H NMR (400 MHz, DMSO-*d*<sub>6</sub>):** δ 11.74 (br s, 1H), 8.45 (d, *J* = 5.6 Hz, 1H), 8.33 (d, *J* = 4.8 Hz, 1H), 7.71 (s, 1H), 7.44-7.55 (m, 3H), 7.27 (s, 1H), 2.93 (s, 3H).

**<sup>13</sup>C NMR (100 MHz, DMSO-*d*<sub>6</sub>):** δ 160.9, 137.0 (2C), 135.2, 133.3, 128.8, 127.4, 127.3, 127.2, 126.0, 121.7, 118.8, 116.2, 25.6.

5-methyl-4-methylene-2-phenyl-3,4-dihydroisoquinolin-1(2*H*)-one (**6a**) and 4,5-dimethyl-2-phenylisoquinolin-1(2*H*)-one (**6b**)

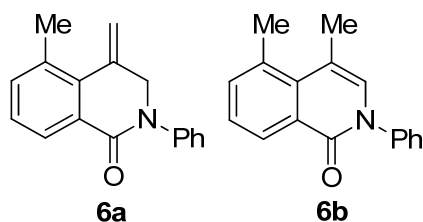

The reaction of 1-iodo-2-methylbenzene (**1a**) (43.6 mg, 0.2 mmol), allyl(phenyl)carbamic chloride (**2t**) (78.3 mg, 0.4 mmol), Pd(OAc)<sub>2</sub> (4.5 mg, 0.02 mmol), PPh<sub>3</sub> (10.5 mg, 0.04 mmol), NBE (18.8 mg, 0.2 mmol), and Cs<sub>2</sub>CO<sub>3</sub> (260.6 mg, 0.8 mmol) in DCE (2 mL) at 95 °C for 6 h, isolated by column chromatography (silica gel, petroleum ether/AcOEt = 12/1), affords 39.8 mg (80%) of **6a** as white solid and 7.4 mg (15%) of **6b** as white solid.

**6a:**

<sup>1</sup>H NMR (400 MHz, CDCl<sub>3</sub>): δ 8.09 (d, *J* = 7.6 Hz, 1H), 7.40-7.43 (m, 5H), 7.33 (t, *J* = 7.6 Hz, 1H), 7.23-7.27 (m, 1H), 5.60 (s, 1H), 5.43 (s, 1H), 4.45 (s, 2H), 2.53 (s, 3H).

<sup>13</sup>C NMR (100 MHz, CDCl<sub>3</sub>): δ 163.6, 142.4, 136.4, 135.3, 135.1, 134.0, 129.9, 128.9, 127.9, 127.0, 126.3, 125.2, 118.1, 57.5, 21.3.

HRMS *m/z* (ESI) calcd for C<sub>17</sub>H<sub>16</sub>NO [M+H]<sup>+</sup> 250.1226, found: 250.1228; calcd for C<sub>17</sub>H<sub>15</sub>NNaO [M+Na]<sup>+</sup> 272.1046, found: 272.1047.

**6b:**

<sup>1</sup>H NMR (400 MHz, CDCl<sub>3</sub>): δ 8.47 (d, *J* = 7.6 Hz, 1H), 7.37-7.51 (m, 7H), 6.94 (s, 1H), 2.81 (s, 3H), 2.53 (s, 3H).

<sup>13</sup>C NMR (100 MHz, CDCl<sub>3</sub>): δ 161.8, 141.2, 136.6, 136.3, 134.6, 130.6, 129.2, 127.9, 127.4, 126.8, 113.1, 24.1, 21.7.

HRMS *m/z* (ESI) calcd for C<sub>17</sub>H<sub>16</sub>NO [M+H]<sup>+</sup> 250.1226, found: 250.1228.

2-butyl-7-methyl-2'*H*-spiro[isindoline-1,1'-naphthalen]-3-one (**7a**) and  
2-butyl-7-methyl-4'*H*-spiro[isindoline-1,1'-naphthalen]-3-one (**7b**)

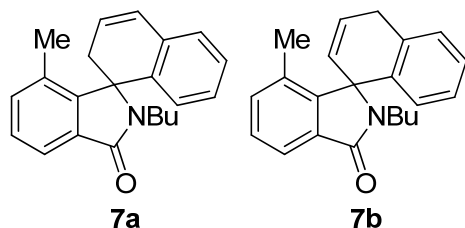

The reaction of 1-iodo-2-methylbenzene (**1a**) (43.6 mg, 0.2 mmol), butyl(3,4-dihydronaphthalen-1-yl)carbamic chloride (**2u**) (105.5 mg, 0.4 mmol), Pd(OAc)<sub>2</sub> (4.5 mg, 0.02 mmol), PPh<sub>3</sub> (10.5 mg, 0.04 mmol), NBE (18.8 mg, 0.2 mmol), and Cs<sub>2</sub>CO<sub>3</sub> (260.6 mg, 0.8 mmol) in toluene (2 mL) at 110 °C for 12 h, isolated by column chromatography (silica gel, petroleum ether/AcOEt = 6/1), affords 47.6 mg (75%) of **7a** as white solid and 3.8 mg (6%) of **7b** as white solid.

**7a:**

<sup>1</sup>H NMR (400 MHz, CDCl<sub>3</sub>): δ 7.76 (d, *J* = 7.6 Hz, 1H), 7.36 (d, *J* = 7.6 Hz, 1H), 7.18-7.24 (m, 3H), 7.03 (t, *J* = 7.2 Hz, 1H), 6.64 (d, *J* = 7.6 Hz, 1H), 6.38 (dt, *J* = 10.0, 3.6 Hz, 1H), 5.38 (d, *J* = 10.4 Hz, 1H), 3.70 (d, *J* = 22.8 Hz, 1H), 3.68 (d, *J* = 22.8 Hz, 1H), 3.26 (ddd, *J* = 14.4, 9.6, 5.6 Hz, 1H), 3.08 (ddd, *J* = 14.4, 9.6, 5.6 Hz, 1H), 1.84 (s, 3H), 1.26-1.42 (m, 2H), 1.19 (tq, *J* = 7.6, 7.2 Hz, 2H), 0.77 (t, *J* = 7.2 Hz, 3H).

<sup>13</sup>C NMR (100 MHz, CDCl<sub>3</sub>): δ 168.4, 148.2, 134.7, 133.7, 133.2, 132.1, 131.7, 128.9, 128.5, 128.1, 127.6, 127.1, 126.8, 125.7, 120.8, 65.7, 40.1, 30.8, 29.2, 20.3, 16.7, 13.5.

HRMS *m/z* (ESI) calcd for C<sub>22</sub>H<sub>24</sub>NO [M+H]<sup>+</sup> 318.1852, found: 318.1856.

**7b:**

<sup>1</sup>H NMR (400 MHz, CDCl<sub>3</sub>): δ 7.74 (d, *J* = 7.6 Hz, 1H), 7.41 (t, *J* = 7.6 Hz, 1H), 7.32 (d, *J* = 7.6

Hz, 1H), 7.27 (td,  $J = 7.6, 1.2$  Hz, 1H), 7.18 (d,  $J = 6.8$  Hz, 1H), 7.02 (td,  $J = 7.4, 1.2$  Hz, 1H), 6.64 (dd,  $J = 5.8, 3.0$  Hz, 1H), 6.53 (d,  $J = 8.0$  Hz, 1H), 6.16 (ddd,  $J = 9.8, 5.4, 2.6$  Hz, 1H), 3.25-3.35 (m, 2H), 3.16 (ddd,  $J = 13.6, 9.6, 6.0$  Hz, 1H), 2.46 (dd,  $J = 19.8, 5.4$  Hz, 1H), 2.02 (s, 3H), 1.09-1.33 (m, 4H), 0.75 (t,  $J = 7.2$  Hz, 3H).

$^{13}\text{C}$  NMR (100 MHz,  $\text{CDCl}_3$ ):  $\delta$  166.9, 149.3, 134.3, 134.0, 132.53, 132.45, 131.6, 128.7, 128.6, 128.3, 127.1, 126.9, 126.8, 125.6, 120.9, 64.2, 40.7, 34.6, 30.7, 20.4, 18.7, 13.5.

HRMS  $m/z$  (ESI) calcd for  $\text{C}_{22}\text{H}_{24}\text{NO}$   $[\text{M}+\text{H}]^+$  318.1852, found: 318.1850.

## Details of Calculation

All of the DFT calculations were performed with the Gaussian 09 program package.<sup>11</sup> The geometry optimization of all the minima involved were performed at the M06 level of theory<sup>12</sup> with the LACVP(d) basis set<sup>13</sup>. It consists of the standard 6-31G(d) basis set for lighter atoms (H, C, N, O, and P) and the LANL2DZ basis set, which includes the relativistic effective core potential (ECP) of Hay and Wadt and employs a split-valence (double- $\zeta$ ) basis set for Pd, Cs and I. The structures of the reactants, intermediates, transition states, and products were fully optimized without any restriction. The vibrational frequencies were computed at the same level to check whether each optimized structure is an energy minimum or a transition state and to evaluate its zero-point vibrational energy (ZPVE) and thermal corrections at 298 K. IRC calculations<sup>14</sup> were used to confirm that the transition states found from the optimization calculations connect the related reactants and products. Single-point solvent calculations (with LACVP(d) basis set) were performed at the optimized gas-phase geometries for all the intermediates and transition states, using the CPCM<sup>15</sup> approach as implemented in Gaussian 09, employing DCE as a solvent. Through the same approach full optimization, without any restriction, was carried out for the model reactions. The reported energies are Gibbs free energies in gas-phase ( $\Delta G$ ). Gibbs free energies in DCE solution ( $\Delta G_{\text{DCE}}$ ) are also given in parenthesis.

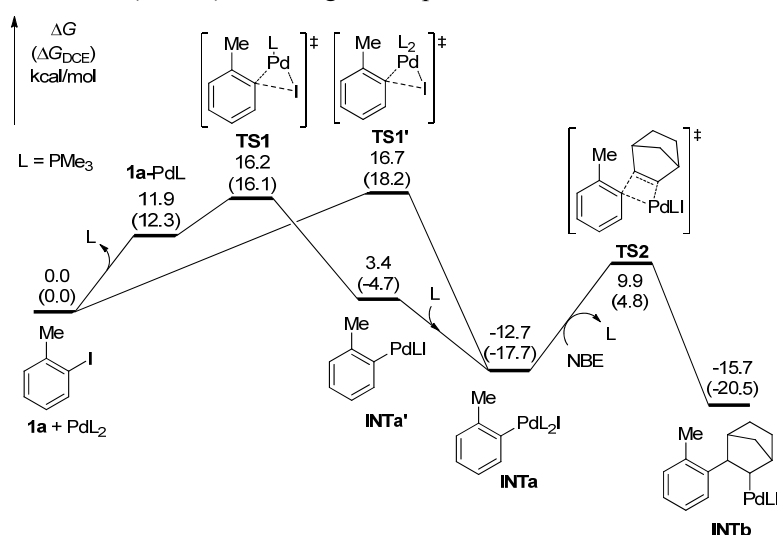

**Fig. S2** DFT-computed energy profiles for the oxidative addition of **1a** with  $\text{Pd}^0$  through the bisphosphine and monophosphine pathways

## DFT-Computed Energies of All Stationary Points

**Table S2.** Sum of electronic and thermal enthalpies ( $H$ , in Hartree), sum of electronic and thermal

free energies ( $G$ , in Hartree), thermal correction to Gibbs free energy ( $CGFE$ , in Hartree), electronic energy in DCE ( $E_{\text{DCE}}$ , in Hartree), and free energies in DCE ( $G_{\text{DCE}}$ , in Hartree). For transition state structures, one imaginary frequency (IFreq) was observed and given below. For all minimum structures, no imaginary frequency was observed.

| Structure                           | $H$          | $G$          | $CGFE$    | $E_{\text{MeCN}}$ | $G_{\text{MeCN}}$ | IFreq      |
|-------------------------------------|--------------|--------------|-----------|-------------------|-------------------|------------|
| <b>1a</b>                           | -281.963388  | -282.006774  | 0.082493  | -282.092242       | -282.009749       | -          |
| <b>PdL<sub>2</sub></b>              | -1048.483740 | -1048.549714 | 0.179943  | -1048.736656      | -1048.556713      | -          |
| <b>1a-PdL</b>                       | -869.601413  | -869.671531  | 0.180636  | -869.859125       | -869.678489       | -          |
| <b>TS1</b>                          | -869.598387  | -869.664693  | 0.183711  | -869.856094       | -869.672383       | -85.1224   |
| <b>INTa'</b>                        | -869.618510  | -869.685100  | 0.184735  | -869.890292       | -869.705557       | -          |
| <b>TS1'</b>                         | -1330.447548 | -1330.529885 | 0.289678  | -1330.827086      | -1330.537408      | -109.4131  |
| <b>INTa</b>                         | -1330.495152 | -1330.576655 | 0.292714  | -1330.887321      | -1330.594607      | -          |
| <b>NBE</b>                          | -272.341258  | -272.375916  | 0.124557  | -272.501380       | -272.376823       | -          |
| <b>L</b>                            | -460.829190  | -460.865964  | 0.083528  | -460.951951       | -460.868423       | -          |
| <b>TS2</b>                          | -1141.973407 | -1142.050654 | 0.334487  | -1142.401658      | -1142.067171      | -253.5108  |
| <b>INTb</b>                         | -1142.014451 | -1142.091482 | 0.337502  | -1142.445034      | -1142.107532      | -          |
| <b>CsI</b>                          | -31.265187   | -31.296705   | -0.027250 | -31.326147        | -31.353397        | -          |
| <b>Cs<sub>2</sub>CO<sub>3</sub></b> | -303.394684  | -303.439990  | -0.020908 | -303.496145       | -303.517053       | -          |
| <b>CsHCO<sub>3</sub></b>            | -284.140976  | -284.178831  | -0.003043 | -284.218001       | -284.221044       | -          |
| <b>INTb'</b>                        | -1414.150573 | -1414.238043 | 0.347055  | -1414.632437      | -1414.285382      | -          |
| <b>TS3</b>                          | -1414.106464 | -1414.192730 | 0.342595  | -1414.582533      | -1414.239938      | -1889.5607 |
| <b>INTc</b>                         | -1590.861420 | -1590.947343 | 0.435836  | -1591.394382      | -1590.958546      | -          |
| <b>2a</b>                           | -899.343758  | -899.391958  | 0.108779  | -899.507991       | -899.399212       | -          |
| <b>INTc'</b>                        | -2029.367003 | -2029.462178 | 0.463283  | -2029.936917      | -2029.473634      | -          |
| <b>TS4</b>                          | -2029.332682 | -2029.426074 | 0.463133  | -2029.904171      | -2029.441038      | -169.0784  |
| <b>INTd</b>                         | -2029.372481 | -2029.466753 | 0.463977  | -2029.950676      | -2029.486699      | -          |

|              |              |              |           |              |              |            |
|--------------|--------------|--------------|-----------|--------------|--------------|------------|
| <b>TS5</b>   | -2029.356370 | -2029.452089 | 0.460536  | -2029.930853 | -2029.470317 | -217.9500  |
| <b>INTe</b>  | -2029.411750 | -2029.506199 | 0.465381  | -2029.994227 | -2029.528846 | -          |
| <b>TS6</b>   | -2029.374964 | -2029.470699 | 0.461267  | -2029.954083 | -2029.492816 | -230.5861  |
| <b>INTf</b>  | -1757.012482 | -1757.096620 | 0.311612  | -1757.429557 | -1757.117945 | -          |
| <b>INTf'</b> | -1580.401996 | -1580.490356 | 0.329877  | -1580.860748 | -1580.530871 | -          |
| <b>TS7</b>   | -1580.392132 | -1580.480551 | 0.324101  | -1580.844100 | -1580.519999 | -1747.2775 |
| <b>CsCl</b>  | -480.062325  | -480.091514  | -0.024862 | -480.123943  | -480.148805  | -          |
| <b>INTg</b>  | -1757.099292 | -1757.192406 | 0.410410  | -1757.617263 | -1757.206853 | -          |
| <b>TS8</b>   | -1757.092150 | -1757.183709 | 0.410445  | -1757.607199 | 0.410445     | -223.8556  |
| <b>3a</b>    | -708.651013  | -708.704197  | 0.205400  | -708.916949  | -708.711549  | -          |
| <b>TS9</b>   | -1947.826674 | -1947.912590 | 0.317778  | -1948.242706 | -1947.924928 | -103.8205  |
| <b>INTh</b>  | -1947.873113 | -1947.959606 | 0.318347  | -1948.299754 | -1947.981407 | -          |

### The coordinates of all stationary points (Å)

|                        |             |             |             |               |             |             |             |
|------------------------|-------------|-------------|-------------|---------------|-------------|-------------|-------------|
| <b>1a</b>              |             |             |             | P             | -2.31959200 | 0.00036100  | 0.00221000  |
| C                      | -2.66578800 | 0.85072500  | 0.00007600  | C             | -3.16761800 | 0.08988400  | 1.63616600  |
| C                      | -1.27255000 | 0.97586800  | -0.00041900 | H             | -2.87151400 | -0.76834900 | 2.25092700  |
| C                      | -0.53303700 | -0.21045500 | -0.00039500 | H             | -2.85760100 | 1.00130400  | 2.16101100  |
| C                      | -1.14025200 | -1.46170000 | -0.00027300 | H             | -4.26195000 | 0.09332700  | 1.52532700  |
| C                      | -2.52808000 | -1.54975600 | 0.00003800  | C             | -3.17620800 | 1.37336800  | -0.88095200 |
| C                      | -3.29199600 | -0.38892000 | 0.00028300  | H             | -2.88198500 | 1.36948000  | -1.93716100 |
| H                      | -3.26655700 | 1.76059100  | 0.00023700  | H             | -4.26995600 | 1.27981900  | -0.81104000 |
| H                      | -0.53116400 | -2.36318200 | -0.00050900 | H             | -2.86930000 | 2.33401000  | -0.45068700 |
| H                      | -3.00547500 | -2.52802700 | 0.00013400  | C             | -3.18926200 | -1.44883500 | -0.73388800 |
| H                      | -4.37884800 | -0.44771200 | 0.00079600  | H             | -4.28204900 | -1.33981700 | -0.67370400 |
| C                      | -0.64148000 | 2.33282200  | -0.00006900 | H             | -2.89689000 | -1.55772700 | -1.78502100 |
| H                      | 0.00026700  | 2.47859200  | -0.87948800 |               |             |             |             |
| H                      | -1.40446200 | 3.11968400  | -0.00188600 | <b>1a-PdL</b> |             |             |             |
| H                      | -0.00326300 | 2.47969500  | 0.88177000  | Pd            | -0.67413700 | 0.18829400  | -0.05806100 |
| I                      | 1.60431300  | -0.14700300 | 0.00006600  | P             | -2.93731900 | -0.19165200 | 0.08634900  |
|                        |             |             |             | I             | 1.93923200  | -1.57210800 | -0.17169700 |
| <b>PdL<sub>2</sub></b> |             |             |             | C             | 1.19684600  | 1.14100300  | -1.44821500 |
| Pd                     | -0.00016400 | -0.00624300 | -0.01258800 | C             | 1.18462800  | 2.53411400  | -1.56208700 |
| P                      | 2.31939800  | 0.00026100  | -0.00065400 | C             | 1.43531600  | 3.32074000  | -0.44785200 |

|            |             |             |             |              |             |             |             |
|------------|-------------|-------------|-------------|--------------|-------------|-------------|-------------|
| C          | 1.66998700  | 2.72496200  | 0.79037700  | H            | -3.35453400 | 1.57097300  | -0.93321800 |
| C          | 1.69024200  | 1.33939900  | 0.95807000  | H            | -4.72773900 | 0.97741100  | 0.05511000  |
| C          | 1.45288900  | 0.54533100  | -0.19366600 | C            | -3.58368300 | -1.33263600 | 1.53551200  |
| H          | 0.99691600  | 2.98890900  | -2.53321800 | H            | -4.68008100 | -1.25843000 | 1.50975800  |
| H          | 1.44137600  | 4.40574500  | -0.53380000 | H            | -3.29888200 | -2.38813600 | 1.61796400  |
| H          | 1.85485600  | 3.35009800  | 1.66458600  | H            | -3.21145000 | -0.81092300 | 2.42506400  |
| H          | 1.08851400  | 0.51400000  | -2.33055400 | C            | 1.93704800  | -0.30161900 | 2.36829600  |
| C          | -4.05595100 | 0.74141900  | -1.04137100 | H            | 2.41524600  | -0.90929700 | 3.14598100  |
| H          | -5.11063300 | 0.47779500  | -0.87422800 | H            | 2.31690400  | 0.72638500  | 2.45993900  |
| H          | -3.92364400 | 1.81759800  | -0.87946100 | H            | 0.86131000  | -0.25903100 | 2.57637300  |
| H          | -3.79231700 | 0.52347800  | -2.08307100 |              |             |             |             |
| C          | -3.75880100 | 0.13614500  | 1.70337700  | <b>INTa'</b> |             |             |             |
| H          | -3.63112600 | 1.19168200  | 1.97097100  | Pd           | -0.14740800 | -0.78468300 | 0.00662000  |
| H          | -4.83254100 | -0.09931500 | 1.66787000  | P            | 2.12271400  | -1.32883000 | 0.01060500  |
| H          | -3.28550800 | -0.46877600 | 2.48584400  | C            | 2.86401300  | -1.33625000 | -1.66408000 |
| C          | -3.51066700 | -1.91282200 | -0.23381600 | H            | 2.78976200  | -0.32883800 | -2.09162200 |
| H          | -3.21768700 | -2.21285000 | -1.24694200 | H            | 3.92125100  | -1.63236900 | -1.62644200 |
| H          | -3.02691700 | -2.59907200 | 0.47130900  | H            | 2.31571900  | -2.02852400 | -2.31327200 |
| H          | -4.60209600 | -2.00275900 | -0.13337900 | C            | 2.53481900  | -3.00034600 | 0.64550300  |
| C          | 2.02425100  | 0.74460800  | 2.29160200  | H            | 1.97696800  | -3.75913100 | 0.08440800  |
| H          | 1.32335300  | -0.04936400 | 2.57515500  | H            | 3.61036600  | -3.20382900 | 0.55007400  |
| H          | 3.02871000  | 0.29581900  | 2.28221200  | H            | 2.24789700  | -3.07665300 | 1.70062500  |
| H          | 2.00706600  | 1.51257500  | 3.07371600  | C            | 3.27882900  | -0.24523100 | 0.92785000  |
|            |             |             |             | H            | 3.00817700  | -0.21188600 | 1.98970900  |
|            |             |             |             | H            | 4.30864900  | -0.61408600 | 0.82953100  |
| <b>TS1</b> |             |             |             | H            | 3.21636400  | 0.77405600  | 0.52649100  |
| Pd         | -0.47137200 | -0.44209500 | -0.07682600 | I            | -2.72304900 | -0.25955000 | -0.12146500 |
| P          | -2.82531500 | -0.59771200 | 0.02748100  | C            | 0.56422000  | 1.90934200  | 0.97045200  |
| I          | 0.78870700  | 1.96703400  | -0.14296500 | C            | 1.07703700  | 3.19962600  | 0.79322600  |
| C          | 1.93746700  | -0.87111200 | -1.43157200 | C            | 1.44375000  | 3.67908100  | -0.46017600 |
| C          | 1.58009200  | -0.41022200 | -0.16035100 | C            | 1.28760600  | 2.87394200  | -1.58234900 |
| H          | 1.45879700  | -0.44967400 | -2.31407100 | C            | 0.78240400  | 1.58070400  | -1.44063700 |
| C          | 2.23098500  | -0.85336400 | 1.00553000  | C            | 0.45509000  | 1.11576000  | -0.17366800 |
| C          | 2.91738100  | -1.85390900 | -1.55380400 | H            | 1.18036000  | 3.83976000  | 1.67078200  |
| H          | 3.18884700  | -2.22845000 | -2.53955200 | H            | 1.84115600  | 4.68768200  | -0.55999800 |
| C          | 3.55415500  | -2.33170700 | -0.41497000 | H            | 1.54916600  | 3.24509000  | -2.57222100 |
| H          | 4.32993900  | -3.09074300 | -0.50076400 | H            | 0.63923700  | 0.94575700  | -2.31441200 |
| C          | 3.21073700  | -1.83476800 | 0.83960500  | C            | 0.14336300  | 1.43182900  | 2.32658200  |
| H          | 3.71851000  | -2.21355900 | 1.72791000  | H            | 0.45211800  | 2.13524100  | 3.11001200  |
| C          | -3.76127000 | -1.47794500 | -1.29054800 | H            | -0.94883700 | 1.31711100  | 2.37546800  |
| H          | -3.47361100 | -2.53570300 | -1.30864700 | H            | 0.56648300  | 0.44392600  | 2.55873900  |
| H          | -4.84580400 | -1.40399500 | -1.12753000 |              |             |             |             |
| H          | -3.51679300 | -1.04382000 | -2.26707900 | <b>TS1'</b>  |             |             |             |
| C          | -3.63280800 | 1.05265500  | -0.00751600 | Pd           | -0.44340400 | 0.20527100  | -0.22342700 |
| H          | -3.25992000 | 1.65397300  | 0.83059500  |              |             |             |             |



|   |             |             |             |   |             |             |             |
|---|-------------|-------------|-------------|---|-------------|-------------|-------------|
| P | -2.67514500 | -0.33728300 | 0.50508500  | P | 2.61800900  | 0.54658200  | 0.01594900  |
| P | -0.02938500 | 2.53786600  | -0.60989100 | P | -0.55414200 | 2.39765200  | -0.02630300 |
| I | 0.76191300  | -2.19545100 | -1.05485400 | C | -0.24332500 | 3.13926100  | -1.67584100 |
| C | 2.63632500  | 0.24597600  | -0.37450700 | H | -0.80326700 | 2.57093200  | -2.42884200 |
| C | 3.58972300  | 0.92017200  | 0.37062300  | H | -0.56131000 | 4.19057900  | -1.71019400 |
| C | 3.57202600  | 0.82792500  | 1.76383100  | H | 0.82264000  | 3.07446900  | -1.92667900 |
| C | 2.60350100  | 0.05050400  | 2.38090600  | C | 0.21675200  | 3.60578600  | 1.12283500  |
| C | 1.61908500  | -0.64453500 | 1.66188300  | H | 1.29903100  | 3.65423300  | 0.96283000  |
| C | 1.62638700  | -0.49392000 | 0.26177100  | H | -0.20966800 | 4.60850700  | 0.98095900  |
| H | 4.35239600  | 1.51059700  | -0.13672300 | H | 0.03598800  | 3.28518900  | 2.15635400  |
| H | 4.32537200  | 1.33861900  | 2.36096800  | C | -2.32867800 | 2.78398200  | 0.21755300  |
| H | 2.60506100  | -0.04863500 | 3.46782600  | H | -2.63865100 | 2.50801100  | 1.23206900  |
| H | 2.64881400  | 0.29396400  | -1.46273800 | H | -2.49504000 | 3.86008100  | 0.07084600  |
| C | 1.15475900  | 3.21365900  | -1.85606800 | H | -2.94270100 | 2.21309900  | -0.48815700 |
| H | 1.24658800  | 4.30697100  | -1.77973600 | C | 3.29879100  | -0.00078000 | -1.59750100 |
| H | 2.14230900  | 2.76339900  | -1.69457500 | H | 4.39341200  | 0.09109000  | -1.62322700 |
| H | 0.82169200  | 2.95192800  | -2.86766600 | H | 3.01041400  | -1.04478900 | -1.76716000 |
| C | 0.63214100  | 3.32658300  | 0.91976300  | H | 2.86488900  | 0.60707100  | -2.40194700 |
| H | 1.58829500  | 2.85436400  | 1.18275400  | C | 3.41951800  | 2.20297200  | 0.17399500  |
| H | 0.78170500  | 4.40967900  | 0.79797000  | H | 4.50256400  | 2.12689500  | 0.00399500  |
| H | -0.06860700 | 3.14907300  | 1.74601100  | H | 3.00478500  | 2.91011200  | -0.55642600 |
| C | -1.48587300 | 3.62548200  | -0.93284200 | H | 3.25799800  | 2.60577900  | 1.18177100  |
| H | -1.94258900 | 3.35971800  | -1.89457100 | C | 3.61810200  | -0.40768000 | 1.22090600  |
| H | -2.23546000 | 3.45997700  | -0.14720700 | H | 3.34767000  | -1.46752900 | 1.15010300  |
| H | -1.21583100 | 4.69171100  | -0.94804500 | H | 4.69181700  | -0.28331900 | 1.02348700  |
| C | -4.06068100 | 0.08545300  | -0.63674100 | H | 3.39549600  | -0.06546600 | 2.23864800  |
| H | -5.04273500 | -0.14851700 | -0.19992200 | I | 0.64007100  | -2.48180800 | -0.06720200 |
| H | -4.01916300 | 1.15577000  | -0.87641400 | C | -2.60497900 | -0.45130000 | 0.98062700  |
| H | -3.94360200 | -0.47094800 | -1.57445300 | C | -3.96769200 | -0.69066700 | 0.77928400  |
| C | -3.12099400 | -2.07511600 | 0.93516700  | C | -4.51295500 | -0.75906600 | -0.49933400 |
| H | -4.17245600 | -2.16704000 | 1.24418800  | C | -3.68801100 | -0.60280600 | -1.60750000 |
| H | -2.93996700 | -2.72360800 | 0.06893000  | C | -2.32577200 | -0.36160100 | -1.42476100 |
| H | -2.47636600 | -2.42489200 | 1.75192800  | C | -1.78825300 | -0.27260400 | -0.14276900 |
| C | -3.24729500 | 0.52660300  | 2.03303400  | H | -4.61091500 | -0.83126600 | 1.65025100  |
| H | -4.28164900 | 0.26147100  | 2.29750100  | H | -5.57820200 | -0.94646400 | -0.62781700 |
| H | -2.58886000 | 0.26877000  | 2.87235800  | H | -4.09857800 | -0.67521600 | -2.61447600 |
| H | -3.18318000 | 1.61192000  | 1.88086200  | H | -1.67572800 | -0.25918300 | -2.29593900 |
| C | 0.64792900  | -1.49715600 | 2.43071700  | C | -2.03771000 | -0.39718600 | 2.36835200  |
| H | -0.24761900 | -0.93370800 | 2.72859300  | H | -2.81825100 | -0.51849200 | 3.13097500  |
| H | 0.30951200  | -2.36011100 | 1.84410200  | H | -1.28863800 | -1.18879100 | 2.51404700  |
| H | 1.11728000  | -1.87258200 | 3.34984600  | H | -1.52027700 | 0.55725700  | 2.56128300  |

**INTa**

Pd 0.20430400 0.19694900 0.03924300

**NBE**

C 1.17571200 0.77449600 -0.51943000

|   |             |             |             |   |             |             |             |
|---|-------------|-------------|-------------|---|-------------|-------------|-------------|
| C | -0.08459300 | 1.12040500  | 0.32377300  | C | 0.82432000  | 1.64245100  | -0.43759900 |
| C | -0.08448100 | -1.12044900 | 0.32364300  | C | -3.22600300 | 3.09390000  | 0.11796300  |
| C | 1.17581900  | -0.77433100 | -0.51946300 | C | -4.09807700 | 1.81472300  | 0.05044900  |
| H | 1.12198900  | 1.20314100  | -1.52756200 | P | -1.19180300 | -2.39312100 | -0.29161800 |
| H | 2.07992000  | 1.17252900  | -0.03877800 | C | -2.86186100 | -2.61889100 | -1.02936700 |
| H | 1.12221600  | -1.20290500 | -1.52764200 | C | 1.09043700  | 1.98640500  | 2.08849400  |
| H | 2.08006800  | -1.17230200 | -0.03883000 | C | -0.27521700 | -3.72959200 | -1.14358800 |
| C | -0.03116300 | -0.00008000 | 1.37129600  | C | -1.42321100 | -3.05472500 | 1.40069600  |
| H | -0.89879500 | -0.00015500 | 2.04261200  | H | 4.00039700  | 3.78479700  | -1.05091300 |
| H | 0.89712700  | -0.00009300 | 1.96196400  | H | 3.14307900  | 3.44668700  | 1.23910800  |
| C | -1.27197800 | 0.66877500  | -0.49808000 | H | -1.08236500 | 2.37930100  | -1.53335200 |
| H | -1.91195600 | 1.32799600  | -1.08024200 | H | -2.45155200 | 0.26116500  | -1.69183700 |
| C | -1.27193700 | -0.66884400 | -0.49813000 | H | -3.56196900 | -0.24276900 | 0.74037500  |
| H | -1.91194500 | -1.32796200 | -1.08036300 | H | -1.17718400 | 3.33771700  | 0.97190600  |
| H | -0.11158300 | 2.15086300  | 0.69370300  | H | -1.43307500 | 0.82147400  | 1.88541300  |
| H | -0.11131100 | -2.15094400 | 0.69348400  | H | -2.87639700 | 1.77855700  | 2.34944300  |

**L = PMes**

|   |             |             |             |   |             |             |             |
|---|-------------|-------------|-------------|---|-------------|-------------|-------------|
| C | -1.50528100 | -0.59596200 | 0.28648600  | H | -3.16952000 | 3.62601700  | -0.84057000 |
| P | 0.00004300  | -0.00009400 | -0.62302900 | H | -3.61233000 | 3.80442600  | 0.86005700  |
| C | 0.23634600  | 1.60132300  | 0.28647900  | H | 1.88103300  | 2.33235700  | 2.76518700  |
| C | 1.26883700  | -1.00529000 | 0.28657100  | H | 0.16660600  | 2.50511800  | 2.37816300  |
| H | 1.15796200  | -0.91894400 | 1.37756400  | H | 0.94458400  | 0.91297600  | 2.27252700  |
| H | 1.17863400  | -2.06259700 | 0.00841300  | H | 2.83308100  | 2.70984500  | -2.98041000 |
| H | 2.27732400  | -0.67364700 | 0.01019200  | H | -0.82209100 | -4.67915700 | -1.06268900 |
| H | -1.37458500 | -0.54435300 | 1.37745200  | H | -0.14835400 | -3.47143200 | -2.20164200 |
| H | -2.37505600 | 0.01243700  | 0.00943600  | H | 0.72020600  | -3.82803300 | -0.69708500 |
| H | -1.72400300 | -1.63456700 | 0.00924300  | H | -1.88797700 | -4.05019100 | 1.37869400  |
| H | 0.21561100  | 1.46234800  | 1.37746300  | H | -0.44435100 | -3.11664600 | 1.89098000  |
| H | 1.19802300  | 2.05061700  | 0.00950400  | H | -2.05611200 | -2.37175300 | 1.98184300  |
| H | -0.55396800 | 2.30968500  | 0.00896100  | H | -3.19154000 | -3.66057900 | -0.91708200 |

**TS2**

|    |             |             |             |   |            |             |             |
|----|-------------|-------------|-------------|---|------------|-------------|-------------|
| Pd | -0.22034200 | -0.24368300 | -0.28980600 | H | 0.78585700 | 1.38520700  | -2.57655900 |
| C  | 1.31022100  | 1.83951200  | -1.73266800 | I | 2.17300400 | -1.40396500 | 0.43993700  |

|   |             |            |             |
|---|-------------|------------|-------------|
| C | -2.11273500 | 0.63014100 | -0.72003800 |
| C | -1.31888100 | 1.81645900 | -0.63402200 |
| C | -1.84007400 | 2.56452100 | 0.57235900  |
| C | -2.26765400 | 1.42531100 | 1.50569000  |
| C | -3.09512800 | 0.70341800 | 0.43826000  |
| C | 2.45642500  | 2.58845100 | -1.96579300 |
| C | 3.10662000  | 3.18397900 | -0.89093600 |
| C | 2.61507300  | 3.00030000 | 0.39500200  |
| C | 1.47803100  | 2.22779900 | 0.65847900  |

**INTb**

|    |             |             |             |
|----|-------------|-------------|-------------|
| Pd | 0.08874800  | 0.27364300  | 0.31481400  |
| C  | -0.45582000 | -1.69799400 | 1.92566500  |
| C  | -1.95025300 | 0.53776600  | 0.66219300  |
| C  | -2.35561100 | -0.95362200 | 0.53747000  |
| C  | -3.20911000 | -0.95036200 | -0.74388100 |
| C  | -2.59103300 | 0.17065400  | -1.59003400 |
| C  | -2.69336800 | 1.21962300  | -0.47966800 |

|            |             |             |             |                                     |             |             |             |
|------------|-------------|-------------|-------------|-------------------------------------|-------------|-------------|-------------|
| C          | 0.63588100  | -2.47360000 | 2.29731800  | <b>Cs<sub>2</sub>CO<sub>3</sub></b> |             |             |             |
| C          | 1.15402000  | -3.37894900 | 1.38538500  | C                                   | -0.00032700 | 1.21757400  | -0.00040000 |
| C          | 0.58339100  | -3.48240800 | 0.12395800  | O                                   | -0.00020300 | -0.11184100 | -0.00116900 |
| C          | -0.51079700 | -2.71375900 | -0.27942400 | O                                   | 1.11721000  | 1.84305100  | -0.03403000 |
| C          | -1.06571200 | -1.79400800 | 0.64915000  | O                                   | -1.11822700 | 1.84260800  | 0.03436600  |
| C          | -4.55763900 | -0.31042300 | -0.37132500 | Cs                                  | 2.85370600  | -0.32627300 | 0.00203100  |
| C          | -4.19798900 | 1.17913200  | -0.14476800 | Cs                                  | -2.85349200 | -0.32638200 | -0.00186600 |
| P          | 0.51929700  | 2.51229700  | 0.30654700  |                                     |             |             |             |
| C          | -0.65510600 | 3.62248600  | 1.17809700  | <b>CsHCO<sub>3</sub></b>            |             |             |             |
| C          | -1.01218500 | -2.93918700 | -1.67782600 | C                                   | -2.00439300 | 0.04371000  | -0.00022500 |
| C          | 2.09855000  | 2.99049800  | 1.09551400  | O                                   | -1.47856800 | -1.10068100 | -0.00061300 |
| C          | 0.64549500  | 3.24084100  | -1.36639800 | O                                   | -3.38368600 | 0.06866300  | 0.00065700  |
| H          | 2.01539200  | -3.99210500 | 1.64270400  | O                                   | -1.44261100 | 1.15507600  | -0.00052600 |
| H          | 1.01647800  | -4.17399600 | -0.59807400 | Cs                                  | 1.20172000  | -0.00688500 | 0.00007800  |
| H          | -2.99446800 | -1.26750000 | 1.38068600  | H                                   | -3.62934400 | -0.86807100 | 0.00093400  |
| H          | -2.12105800 | 0.99030500  | 1.64932500  |                                     |             |             |             |
| H          | -2.33591900 | 2.22365500  | -0.74187200 | <b>INTb'</b>                        |             |             |             |
| H          | -3.32571300 | -1.92619900 | -1.22344300 | Pd                                  | -0.73057300 | -0.18635900 | 0.12716300  |
| H          | -1.55087700 | -0.00429500 | -1.90401600 | C                                   | -1.97902000 | -0.14177400 | 2.07256100  |
| H          | -3.19579200 | 0.41469800  | -2.47509200 | C                                   | -0.84803800 | 1.85446500  | 0.41470300  |
| H          | -4.76621700 | 1.83655500  | -0.81778700 | C                                   | -2.34411500 | 1.94334800  | 0.79790500  |
| H          | -4.39650100 | 1.51667800  | 0.88200400  | C                                   | -2.90898800 | 2.76314200  | -0.37603900 |
| H          | -5.01266700 | -0.78286500 | 0.50959200  | C                                   | -2.03369300 | 2.34458400  | -1.56605700 |
| H          | -5.26802500 | -0.42124800 | -1.20144500 | C                                   | -0.71015100 | 2.65843600  | -0.86104700 |
| H          | -0.26863300 | -3.50597000 | -2.24977900 | C                                   | -2.28562200 | -1.42886300 | 2.55764100  |
| H          | -1.94517600 | -3.51982000 | -1.69405700 | C                                   | -3.34593400 | -2.11839800 | 2.01883900  |
| H          | -1.19247000 | -2.00727200 | -2.22285900 | C                                   | -4.09176600 | -1.53464700 | 0.98465100  |
| H          | 1.06894500  | -2.36540300 | 3.28947400  | C                                   | -3.81969600 | -0.27293600 | 0.47529800  |
| H          | 2.23010800  | 4.08105600  | 1.05653300  | C                                   | -2.73712700 | 0.47578100  | 1.03883000  |
| H          | 2.10008600  | 2.66081900  | 2.14099600  | C                                   | -2.42601600 | 4.21029800  | -0.16555300 |
| H          | 2.92467100  | 2.48875200  | 0.57929900  | C                                   | -0.91092400 | 4.14024200  | -0.48702100 |
| H          | 0.83763700  | 4.32162900  | -1.31515500 | P                                   | -0.68047400 | -2.46784800 | -0.77294100 |
| H          | 1.46687500  | 2.74256400  | -1.89556000 | C                                   | 0.97728300  | -3.13657400 | -1.19653800 |
| H          | -0.27920200 | 3.06148500  | -1.92818000 | C                                   | -4.70914900 | 0.24127800  | -0.62009600 |
| H          | -0.33094400 | 4.66823100  | 1.08822400  | C                                   | -1.54663900 | -4.00259600 | -0.22016900 |
| H          | -1.66941800 | 3.52725100  | 0.77552400  | C                                   | -1.42215400 | -2.22777300 | -2.43578800 |
| H          | -0.68294700 | 3.34963900  | 2.24025700  | H                                   | -3.60651000 | -3.11255300 | 2.38010400  |
| H          | -0.91197500 | -1.03494300 | 2.66217000  | H                                   | -4.92917600 | -2.09049100 | 0.55925800  |
| I          | 2.59508800  | -0.31611100 | -0.71542800 | H                                   | -2.52882500 | 2.49068100  | 1.73995100  |
|            |             |             |             | H                                   | -0.11763000 | 2.09054500  | 1.19989300  |
|            |             |             |             | H                                   | 0.19853600  | 2.43075700  | -1.42642200 |
| <b>CsI</b> |             |             |             | H                                   | -3.99336900 | 2.70309100  | -0.51084800 |
| Cs         | 0.00000000  | 0.00000000  | 1.76344300  | H                                   | -2.10569000 | 1.28370300  | -1.84640700 |
| I          | 0.00000000  | 0.00000000  | -1.82998800 | H                                   | -2.21112000 | 2.96739300  | -2.45507700 |

|            |             |             |             |             |             |             |             |
|------------|-------------|-------------|-------------|-------------|-------------|-------------|-------------|
| H          | -0.64984300 | 4.79708500  | -1.32975300 | H           | 1.13762100  | -1.38035800 | 1.99850700  |
| H          | -0.28274800 | 4.43815900  | 0.36422400  | H           | -2.66289700 | -3.21453400 | 1.22938000  |
| H          | -2.63564100 | 4.57255500  | 0.85083100  | H           | -1.49304200 | -1.09228100 | 2.29426600  |
| H          | -2.94756300 | 4.88240300  | -0.86096200 | H           | -0.95860200 | -2.57909300 | 3.14191800  |
| H          | -5.38993400 | -0.55076100 | -0.95560100 | H           | 1.25703400  | -3.85766200 | 2.14300000  |
| H          | -5.33168300 | 1.08331200  | -0.28858000 | H           | 1.39253500  | -3.59093100 | 0.39412200  |
| H          | -4.14099500 | 0.58293400  | -1.49410100 | H           | -0.71430100 | -4.71268400 | 0.14279700  |
| H          | -1.68802400 | -1.85243300 | 3.36314100  | H           | -0.87393800 | -4.80442000 | 1.90397000  |
| H          | -1.44224300 | -4.80621100 | -0.96322300 | H           | -2.73652600 | 2.10687100  | -1.55047100 |
| H          | -1.13377900 | -4.34611900 | 0.73686600  | H           | -0.84681100 | 0.50954400  | -1.46828700 |
| H          | -2.61271900 | -3.79003300 | -0.07118500 | C           | 1.37285800  | 1.00745800  | -1.64217200 |
| H          | -1.36396100 | -3.13214100 | -3.05832900 | O           | 1.48361700  | 1.07964900  | -0.31607300 |
| H          | -2.47386000 | -1.93135000 | -2.31709300 | O           | 0.20483200  | 0.93822200  | -2.19644800 |
| H          | -0.87369600 | -1.40509800 | -2.91154900 | O           | 2.43345900  | 0.98083300  | -2.30589200 |
| H          | 0.88998600  | -4.01611600 | -1.85073500 | Cs          | 3.84841300  | -0.60540300 | -0.32955400 |
| H          | 1.55503700  | -2.35319000 | -1.70333300 | C           | -4.18767200 | -3.03966700 | -0.83578900 |
| H          | 1.50663900  | -3.42167800 | -0.27918700 | H           | -3.37988900 | -3.74637600 | -1.06821900 |
| H          | -1.26388900 | 0.46544400  | 2.62955400  | H           | -4.55271900 | -3.28796300 | 0.17172700  |
| C          | 1.84933100  | -0.03992400 | -0.87163500 | H           | -5.01368200 | -3.24392400 | -1.52944700 |
| O          | 1.89437800  | -0.06385400 | 0.41186100  | C           | -2.36868800 | 3.74037700  | 1.40253700  |
| O          | 2.86865400  | -0.08944700 | -1.61702000 | H           | -2.31221000 | 4.83721600  | 1.35844200  |
| O          | 0.65465900  | 0.01342800  | -1.44979500 | H           | -3.14587600 | 3.39010400  | 0.71219900  |
| Cs         | 4.75998400  | 0.26110500  | 0.51127100  | H           | -2.65981600 | 3.43879000  | 2.41612100  |
| <b>TS3</b> |             |             |             | C           | -0.29816600 | 3.84311200  | -0.57995400 |
| Pd         | -0.47788300 | 0.60779800  | 0.59298400  | H           | -0.82678600 | 3.41654600  | -1.44003400 |
| C          | -2.04396300 | 0.15576500  | -0.95393400 | H           | -0.49373400 | 4.92181100  | -0.50393600 |
| C          | -0.05892700 | -1.36571100 | 0.14005800  | H           | 0.76995500  | 3.66658400  | -0.75368200 |
| C          | -1.34924700 | -2.13109900 | -0.23772000 | C           | 0.37916000  | 3.74970700  | 2.16366100  |
| C          | -1.61740200 | -2.93383600 | 1.07068700  | H           | 0.31911600  | 4.84647500  | 2.12211800  |
| C          | -0.99769900 | -2.06791000 | 2.16855800  | H           | 0.14986500  | 3.41652800  | 3.18307800  |
| C          | 0.36507000  | -1.96237600 | 1.46995300  | H           | 1.40144700  | 3.43617200  | 1.91713200  |
| C          | -3.03066800 | 1.07391600  | -1.34702600 | <b>INTc</b> |             |             |             |
| C          | -4.34360000 | 0.67938600  | -1.55472300 | C           | -3.60424100 | 1.18560900  | -0.74550900 |
| C          | -4.68283300 | -0.65876800 | -1.37452500 | C           | -2.38978100 | 0.53270900  | -0.46725700 |
| C          | -3.74659500 | -1.60573800 | -0.95524000 | C           | -1.17419000 | 1.24577400  | -0.42229200 |
| C          | -2.42630900 | -1.18509600 | -0.70680000 | C           | -1.20510500 | 2.62251100  | -0.67182300 |
| C          | -0.65046400 | -4.12559100 | 1.06949500  | C           | -2.40320500 | 3.27920000  | -0.93944700 |
| C          | 0.73262800  | -3.45127000 | 1.26538700  | C           | -3.59319500 | 2.56207900  | -0.97065500 |
| P          | -0.76350300 | 2.95748900  | 0.95805900  | C           | -2.30802400 | -0.94066900 | -0.24507800 |
| H          | -5.09694800 | 1.39233400  | -1.88957900 | C           | -0.82449300 | -1.41666600 | -0.22923300 |
| H          | -5.70308000 | -0.98916900 | -1.57997700 | C           | -0.69397300 | -2.10479300 | 1.14142600  |
| H          | -1.14864000 | -2.86391600 | -1.04403200 | C           | -1.49901100 | -3.41965000 | 1.10174900  |
| H          | 0.70419300  | -1.36517700 | -0.65119300 | C           | -2.97073900 | -2.92833500 | 1.11717000  |

|    |             |             |             |              |             |             |             |
|----|-------------|-------------|-------------|--------------|-------------|-------------|-------------|
| C  | -2.82420800 | -1.40196800 | 1.14325500  | H            | 0.99235500  | -2.33832700 | -2.72303000 |
| C  | -1.58735600 | -1.23272900 | 2.02756700  | H            | 2.00107200  | -0.98635600 | -3.26039900 |
| Pd | 0.56557500  | 0.15890100  | -0.28054800 |              |             |             |             |
| P  | 1.98391100  | 1.83591500  | 0.76706300  | <b>2a</b>    |             |             |             |
| C  | 1.21715900  | 3.32395800  | 1.53698700  | C            | -2.50678600 | -0.31503700 | 1.18490600  |
| C  | -4.89437800 | 0.42315800  | -0.85138000 | C            | -1.16165900 | 0.03063900  | 1.22454300  |
| P  | 2.29540600  | -1.41284900 | -0.88523400 | C            | -0.50861700 | 0.38851200  | 0.04803400  |
| C  | 2.46600000  | 0.91876600  | 2.29595300  | C            | -1.20004000 | 0.42034000  | -1.16016600 |
| C  | 3.61714200  | 2.54807300  | 0.27588800  | C            | -2.54938700 | 0.08607300  | -1.19193600 |
| H  | -1.26042200 | -4.02002900 | 0.21133900  | C            | -3.20265000 | -0.28479700 | -0.02072600 |
| H  | -2.40859400 | 4.35208100  | -1.13509800 | H            | -3.01659800 | -0.60199100 | 2.10272900  |
| H  | -4.53352000 | 3.07151300  | -1.18939000 | H            | -0.60417600 | 0.01871300  | 2.15958000  |
| H  | -2.88273900 | -1.47037300 | -1.02739300 | H            | -0.67071400 | 0.70199100  | -2.06992100 |
| H  | -0.62070700 | -2.12013700 | -1.05340300 | H            | -3.08947400 | 0.10833800  | -2.13663800 |
| H  | 0.33726600  | -2.23515000 | 1.49934600  | H            | -4.25768100 | -0.55109600 | -0.04640900 |
| H  | -3.72521300 | -0.87000500 | 1.47482300  | N            | 0.86154500  | 0.79802300  | 0.07794800  |
| H  | -1.23883900 | -0.19331000 | 2.09946100  | C            | 1.18047500  | 2.19174400  | -0.23731700 |
| H  | -1.72876300 | -1.64452400 | 3.03826000  | H            | 0.25598000  | 2.77284000  | -0.19527300 |
| H  | -1.27798700 | -4.04190300 | 1.98170400  | H            | 1.89512800  | 2.58617900  | 0.49200500  |
| H  | -3.54543100 | -3.27114300 | 0.24520300  | H            | 1.62535000  | 2.28082000  | -1.23684200 |
| H  | -3.49533100 | -3.28583000 | 2.01427100  | C            | 1.93743900  | -0.00987300 | 0.25476100  |
| H  | -0.27835700 | 3.19724900  | -0.68487400 | O            | 3.08390000  | 0.33473600  | 0.24148500  |
| H  | 4.07052900  | 3.11049600  | 1.10471900  | Cl           | 1.51156900  | -1.74271000 | 0.51485900  |
| H  | 4.30575400  | 1.74843600  | -0.02252100 |              |             |             |             |
| H  | 3.48794400  | 3.22271600  | -0.57891600 | <b>INTc'</b> |             |             |             |
| H  | 3.05372600  | 1.54411200  | 2.98321600  | Pd           | -0.05983200 | -0.54631900 | -0.77157500 |
| H  | 1.55490600  | 0.57861300  | 2.80574900  | C            | 0.89509000  | 1.25599700  | -0.81420700 |
| H  | 3.05054900  | 0.02769700  | 2.03196300  | C            | 1.62544100  | -1.03063900 | 0.32945200  |
| H  | 1.84595200  | 3.70609100  | 2.35336600  | C            | 2.52179500  | 0.19492900  | 0.68935900  |
| H  | 1.08648600  | 4.11928800  | 0.79396900  | C            | 3.90588100  | -0.24336400 | 0.14541500  |
| H  | 0.22587400  | 3.06197300  | 1.92601000  | C            | 3.52363400  | -1.03712900 | -1.10805200 |
| H  | -5.72637800 | 1.08858600  | -1.11468900 | C            | 2.59322400  | -1.99440700 | -0.35918700 |
| H  | -4.83967900 | -0.35901000 | -1.62336600 | C            | 0.42831000  | 2.34948300  | -1.54891700 |
| H  | -5.16299900 | -0.08653800 | 0.08472100  | C            | 0.99329600  | 3.61333000  | -1.37866000 |
| C  | 4.07698100  | -0.94555500 | -0.99459100 | C            | 2.02906700  | 3.79285100  | -0.46762900 |
| C  | 2.44373600  | -3.06762900 | -0.09105200 | C            | 2.55401300  | 2.71250700  | 0.24701600  |
| C  | 1.98802200  | -1.88718600 | -2.63499100 | C            | 1.99632200  | 1.43797600  | 0.04632100  |
| H  | 4.66907600  | -1.73955600 | -1.47116600 | C            | 4.45351500  | -1.34859400 | 1.05507400  |
| H  | 4.17681800  | -0.02768500 | -1.58834200 | C            | 3.53928300  | -2.55641600 | 0.72344200  |
| H  | 4.48849300  | -0.75672600 | 0.00554000  | P            | -1.04465400 | -2.75242200 | -0.61417900 |
| H  | 3.16666600  | -3.69868900 | -0.62655200 | H            | 0.61124800  | 4.46187100  | -1.94748600 |
| H  | 2.77259200  | -2.95321500 | 0.95004100  | H            | 2.45595400  | 4.78572100  | -0.31315400 |
| H  | 1.46798100  | -3.56855400 | -0.08338100 | H            | 2.58781100  | 0.31433300  | 1.78846300  |
| H  | 2.74187700  | -2.59717700 | -3.00352800 | H            | 1.16116900  | -1.48032200 | 1.22301700  |

|    |             |             |             |            |             |             |             |
|----|-------------|-------------|-------------|------------|-------------|-------------|-------------|
| H  | 2.11417900  | -2.77588000 | -0.96480700 |            |             |             |             |
| H  | 4.59989700  | 0.59209000  | -0.00958300 | <b>TS4</b> |             |             |             |
| H  | 3.00125800  | -0.43764200 | -1.86392200 | Pd         | -0.08718600 | -0.15526700 | -0.64932600 |
| H  | 4.38527400  | -1.54144100 | -1.56943100 | C          | -1.94053900 | -0.99641300 | -0.66589300 |
| H  | 4.12207800  | -3.40033100 | 0.32717400  | C          | -1.09723000 | 1.16018700  | 0.59684600  |
| H  | 2.98972700  | -2.92664500 | 1.60146700  | C          | -2.51207100 | 0.67483800  | 1.04009400  |
| H  | 4.41886700  | -1.06410700 | 2.11643100  | C          | -3.38668600 | 1.91632100  | 0.74106500  |
| H  | 5.50201900  | -1.56968800 | 0.81230200  | C          | -2.78076000 | 2.40811300  | -0.57545800 |
| H  | -0.38985500 | 2.23133900  | -2.26092100 | C          | -1.36941300 | 2.54808200  | -0.00362300 |
| Cl | -2.63947100 | 0.46512900  | -1.53940000 | C          | -2.22107100 | -2.05403100 | -1.52564500 |
| C  | -2.56738100 | 2.17774500  | -0.85651700 | C          | -3.47031400 | -2.66482800 | -1.46318400 |
| O  | -2.75312900 | 3.08973000  | -1.60396000 | C          | -4.40636000 | -2.24392200 | -0.52413700 |
| N  | -2.27534200 | 2.22660700  | 0.45936800  | C          | -4.14233400 | -1.18073800 | 0.33936200  |
| C  | -1.87552900 | 3.55227400  | 0.94981600  | C          | -2.89970300 | -0.52933200 | 0.24221000  |
| H  | -0.83584900 | 3.76651500  | 0.66155400  | C          | -2.99465600 | 3.04011100  | 1.71091400  |
| H  | -2.53070300 | 4.31050500  | 0.51260300  | C          | -1.61612500 | 3.50662300  | 1.17583400  |
| H  | -1.97575300 | 3.56037000  | 2.03798700  | P          | 1.77044600  | 1.44013200  | -1.30552700 |
| C  | 3.69603100  | 2.94203500  | 1.19632000  | H          | -3.70431300 | -3.49553100 | -2.12885700 |
| H  | 3.61681500  | 2.32514900  | 2.10223400  | H          | -5.36902100 | -2.75331100 | -0.45094800 |
| H  | 4.66825800  | 2.70327300  | 0.74042700  | H          | -2.53188200 | 0.45638300  | 2.12443500  |
| H  | 3.74063400  | 3.99334600  | 1.50921300  | H          | -0.38417100 | 1.22810000  | 1.43788700  |
| C  | -0.61754200 | -3.94330200 | -1.95100600 | H          | -0.61052900 | 2.91620900  | -0.70340200 |
| H  | -0.97390700 | -3.55554600 | -2.91287700 | H          | -4.46123200 | 1.70209100  | 0.72298500  |
| H  | 0.47177300  | -4.05417300 | -2.01730000 | H          | -2.85428000 | 1.67514400  | -1.38959200 |
| H  | -1.06797600 | -4.93001600 | -1.77281700 | H          | -3.20134700 | 3.36690700  | -0.91126200 |
| C  | -0.59029200 | -3.71548500 | 0.88484500  | H          | -1.65827100 | 4.54768900  | 0.82295000  |
| H  | 0.49746000  | -3.84725600 | 0.93515600  | H          | -0.81782800 | 3.45032200  | 1.92994700  |
| H  | -0.90920700 | -3.15658200 | 1.77405800  | H          | -2.94981400 | 2.68507600  | 2.75021400  |
| H  | -1.06943900 | -4.70434900 | 0.88649100  | H          | -3.72769400 | 3.85731100  | 1.67987800  |
| C  | -2.87765100 | -2.92138900 | -0.57822700 | H          | -1.45869700 | -2.42946200 | -2.20838500 |
| H  | -3.27948700 | -2.33693100 | 0.26007400  | Cl         | 1.40144300  | -2.03532300 | -1.55719400 |
| H  | -3.30898200 | -2.52466000 | -1.50562000 | C          | 0.48932500  | -1.97620900 | 0.57042600  |
| H  | -3.17915400 | -3.97243400 | -0.46728500 | O          | -0.30378100 | -2.84766600 | 0.70210400  |
| C  | -2.19929400 | 1.12121600  | 1.35988100  | N          | 1.37342100  | -1.51819400 | 1.50571100  |
| C  | -1.00252700 | 0.86196000  | 2.02565700  | C          | 0.87681000  | -1.74094600 | 2.87184400  |
| C  | -3.33540300 | 0.36123800  | 1.62941900  | H          | -0.09282900 | -1.24304400 | 3.01002900  |
| C  | -0.94830100 | -0.16466400 | 2.96300500  | H          | 0.75020000  | -2.81416200 | 3.05628300  |
| H  | -0.11724500 | 1.45239900  | 1.78879700  | H          | 1.60342700  | -1.32873000 | 3.57568100  |
| C  | -3.26644400 | -0.68033400 | 2.54814400  | C          | -5.18294900 | -0.77354100 | 1.34473700  |
| H  | -4.26686200 | 0.59176900  | 1.11396300  | H          | -4.73819600 | -0.38113400 | 2.26909900  |
| C  | -2.07429400 | -0.94185600 | 3.22029700  | H          | -5.85503900 | 0.00730300  | 0.95831100  |
| H  | -0.01248700 | -0.36477500 | 3.48336100  | H          | -5.81467500 | -1.62934500 | 1.61610000  |
| H  | -4.15587600 | -1.27226400 | 2.75909000  | C          | 1.09631500  | 2.02254400  | -2.92082200 |
| H  | -2.02759900 | -1.74370200 | 3.95599500  | H          | 1.02198300  | 1.15514700  | -3.59007200 |

|             |             |             |             |            |             |             |             |
|-------------|-------------|-------------|-------------|------------|-------------|-------------|-------------|
| H           | 0.08859100  | 2.44014400  | -2.80261300 | H          | 2.48287800  | 1.30497900  | 1.77545800  |
| H           | 1.74801700  | 2.77676900  | -3.38408100 | H          | 1.75521200  | -0.92416500 | 1.38126000  |
| C           | 2.20931500  | 3.02390700  | -0.46861500 | H          | 2.59266100  | -1.76366900 | -1.08014900 |
| H           | 1.31437100  | 3.55312000  | -0.12064900 | H          | 3.90757800  | 2.25405400  | -0.32929000 |
| H           | 2.83598700  | 2.79889900  | 0.40260500  | H          | 2.43709900  | 0.73638900  | -1.95294800 |
| H           | 2.77234600  | 3.68211700  | -1.14490400 | H          | 4.14089300  | 0.19335500  | -1.99228400 |
| C           | 3.43300300  | 0.87717300  | -1.84708000 | H          | 4.92307200  | -1.63555400 | -0.27256300 |
| H           | 4.07794000  | 0.70982200  | -0.97653100 | H          | 4.00963100  | -1.63750400 | 1.24325900  |
| H           | 3.33411800  | -0.07275900 | -2.38525300 | H          | 4.74163200  | 0.61431400  | 1.65383900  |
| H           | 3.89877300  | 1.62739000  | -2.50123600 | H          | 5.65699300  | 0.55477500  | 0.14102800  |
| C           | 2.66450700  | -0.94507700 | 1.33765000  | H          | 2.17926200  | 5.16640000  | 1.27821700  |
| C           | 2.93366700  | 0.30410700  | 1.89949500  | H          | 2.75083100  | 3.60987200  | 1.90461900  |
| C           | 3.69545000  | -1.68655800 | 0.76101500  | H          | 3.36768100  | 4.22879900  | 0.37208500  |
| C           | 4.23064200  | 0.80603100  | 1.89177900  | H          | -1.63822500 | 1.80597300  | -1.64503000 |
| H           | 2.11678000  | 0.87283500  | 2.34620300  | H          | -1.61553000 | -4.69836000 | 1.18201400  |
| C           | 4.98644900  | -1.17098500 | 0.74026400  | H          | -1.76410400 | -3.09818500 | 1.96529700  |
| H           | 3.47765200  | -2.66577800 | 0.34136000  | H          | -2.59400600 | -3.41457600 | 0.42356500  |
| C           | 5.26052400  | 0.06971100  | 1.31109200  | H          | -0.17749800 | -5.15719400 | -1.06941000 |
| H           | 4.43612300  | 1.77614300  | 2.34268000  | H          | -0.93350600 | -3.84332900 | -2.04053800 |
| H           | 5.78785100  | -1.75342300 | 0.28956300  | H          | 0.81792500  | -3.90859000 | -1.89516000 |
| H           | 6.27652100  | 0.46023900  | 1.30793700  | H          | 1.00317100  | -4.71511000 | 1.39014700  |
|             |             |             |             | H          | 2.11404300  | -3.49048300 | 0.71670300  |
|             |             |             |             | H          | 1.11994500  | -3.09276700 | 2.14283800  |
| <b>INTd</b> |             |             |             | Cl         | 0.07464600  | -0.91962900 | -2.72915800 |
| Pd          | -0.06476800 | -0.54851600 | -0.30608000 | C          | -0.68308700 | -0.33255300 | 1.66091200  |
| C           | 0.12970800  | 1.48456200  | -0.44819800 | O          | -0.01579400 | -0.63766600 | 2.63199600  |
| C           | 1.88732800  | -0.33804600 | 0.46669400  | N          | -1.99421500 | 0.06591700  | 1.81019000  |
| C           | 2.28397100  | 1.13432800  | 0.70261600  | C          | -2.48076100 | 0.20596000  | 3.18173700  |
| C           | 3.59980300  | 1.22329800  | -0.12222200 | H          | -2.10840500 | 1.12636300  | 3.65116900  |
| C           | 3.26968900  | 0.36391400  | -1.34514400 | H          | -3.57433800 | 0.21666800  | 3.17097300  |
| C           | 2.90226900  | -0.87173900 | -0.52294000 | H          | -2.12765800 | -0.64198700 | 3.77593800  |
| C           | -0.81569700 | 2.26621600  | -1.09984700 | C          | -2.83389700 | 0.47203600  | 0.74280100  |
| C           | -0.70354000 | 3.65249600  | -1.04182800 | C          | -2.94991600 | -0.29821700 | -0.41569300 |
| C           | 0.34568400  | 4.24088700  | -0.34407400 | C          | -3.57050300 | 1.65369400  | 0.85069000  |
| C           | 1.33433500  | 3.46765700  | 0.26513500  | C          | -3.73789000 | 0.13678600  | -1.47717800 |
| C           | 1.23121400  | 2.06681100  | 0.18966100  | H          | -2.43660900 | -1.25752100 | -0.49122500 |
| C           | 4.66728600  | 0.37901600  | 0.58323000  | C          | -4.38768900 | 2.06358000  | -0.19493000 |
| C           | 4.19004300  | -1.07044700 | 0.31929700  | H          | -3.47344900 | 2.26790500  | 1.74428500  |
| P           | -0.19761700 | -3.00648400 | 0.10792500  | C          | -4.46683200 | 1.31496200  | -1.36772400 |
| C           | 1.13779000  | -3.64298500 | 1.19291400  | H          | -3.77641200 | -0.45934600 | -2.38688300 |
| C           | 2.46194600  | 4.14595000  | 0.99033400  | H          | -4.95016600 | 2.99098600  | -0.10095800 |
| C           | -1.68383600 | -3.61711500 | 1.00113000  | H          | -5.09406800 | 1.65013700  | -2.19126600 |
| C           | -0.11678200 | -4.09828400 | -1.35543100 |            |             |             |             |
| H           | -1.45098100 | 4.27546200  | -1.53343400 |            |             |             |             |
| H           | 0.41110300  | 5.32787200  | -0.27401000 | <b>TS5</b> |             |             |             |

|    |             |             |             |             |             |             |             |
|----|-------------|-------------|-------------|-------------|-------------|-------------|-------------|
| Pd | 0.27062600  | -0.66457800 | -0.27794300 | Cl          | -1.22289900 | -1.55304000 | -2.07216800 |
| C  | -0.18974900 | 1.36377000  | -0.34070100 | C           | -0.57930000 | 0.28989600  | 1.46856900  |
| C  | 2.07157200  | -0.00305000 | 0.53296600  | O           | 0.15297500  | 0.58186700  | 2.38163800  |
| C  | 2.12640600  | 1.55056300  | 0.56683100  | N           | -1.89194800 | -0.06304700 | 1.68076300  |
| C  | 3.35559500  | 1.82091300  | -0.35172800 | C           | -2.26425400 | -0.13344800 | 3.09892600  |
| C  | 3.21923100  | 0.73677100  | -1.42114800 | H           | -2.38795500 | 0.86796600  | 3.53604400  |
| C  | 3.20000000  | -0.41094100 | -0.41007400 | H           | -3.20926400 | -0.68002500 | 3.17223700  |
| C  | -1.27911700 | 1.85387400  | -1.06319000 | H           | -1.48543700 | -0.65868700 | 3.65877200  |
| C  | -1.35184400 | 3.21568800  | -1.33223500 | C           | -3.00936000 | 0.13551200  | 0.80468000  |
| C  | -0.35758600 | 4.06511500  | -0.86161200 | C           | -3.53141200 | -0.91816000 | 0.06711300  |
| C  | 0.77645500  | 3.58210000  | -0.20120000 | C           | -3.63669100 | 1.38339100  | 0.79534000  |
| C  | 0.88282000  | 2.20021400  | 0.02256500  | C           | -4.65278900 | -0.70799800 | -0.73066100 |
| C  | 4.61709300  | 1.37159700  | 0.39653000  | H           | -3.03920100 | -1.88657600 | 0.09486700  |
| C  | 4.52011300  | -0.17294300 | 0.35525300  | C           | -4.76196800 | 1.58616800  | 0.00879700  |
| P  | 0.81734100  | -2.97884500 | 0.06087100  | H           | -3.21008400 | 2.19608200  | 1.38392500  |
| C  | 2.04621300  | -3.45893600 | 1.33952900  | C           | -5.26495300 | 0.53961900  | -0.76332200 |
| C  | 1.81161900  | 4.56848400  | 0.26657500  | H           | -5.03739300 | -1.52483500 | -1.33795500 |
| C  | -0.67844200 | -3.88538100 | 0.60167000  | H           | -5.24178400 | 2.56327800  | -0.01080000 |
| C  | 1.35717100  | -3.92406100 | -1.40934800 | H           | -6.13993400 | 0.69972800  | -1.39112100 |
| H  | -2.19884000 | 3.61567200  | -1.88872500 |             |             |             |             |
| H  | -0.44785900 | 5.14153900  | -1.01875900 | <b>INTe</b> |             |             |             |
| H  | 2.33178200  | 1.90942000  | 1.58832700  | Pd          | -1.55975300 | 0.27367300  | -0.28650800 |
| H  | 2.13530800  | -0.45436400 | 1.52878300  | C           | 0.72697200  | 1.24433000  | 0.69566600  |
| H  | 3.11802100  | -1.42225500 | -0.82968400 | C           | -0.32340600 | -1.38204100 | -0.32853900 |
| H  | 3.40783900  | 2.84812400  | -0.72497800 | C           | 0.92844800  | -0.67244300 | -0.90913500 |
| H  | 2.29819600  | 0.81227500  | -2.01479700 | C           | 1.01850700  | -1.29618100 | -2.31822100 |
| H  | 4.08157200  | 0.69752900  | -2.10144800 | C           | -0.43726800 | -1.61836000 | -2.68048400 |
| H  | 5.36340500  | -0.61408100 | -0.19481700 | C           | -0.70708500 | -2.40095600 | -1.39147100 |
| H  | 4.50448000  | -0.63074000 | 1.35414200  | C           | 0.54907900  | 2.57531700  | 1.06716200  |
| H  | 4.65289000  | 1.77219200  | 1.41888200  | C           | 0.44224700  | 3.55602200  | 0.09521400  |
| H  | 5.51820200  | 1.72352500  | -0.12335400 | C           | 0.50103000  | 3.19338200  | -1.23903400 |
| H  | 1.32932300  | 5.50526900  | 0.57484700  | C           | 0.64082200  | 1.86413400  | -1.65329800 |
| H  | 2.38886600  | 4.19718700  | 1.12240200  | C           | 0.74882700  | 0.84093300  | -0.67536200 |
| H  | 2.53085400  | 4.82968900  | -0.52314300 | C           | 1.57424700  | -2.71738400 | -2.11576000 |
| H  | -2.04474700 | 1.17288600  | -1.42849900 | C           | 0.40447200  | -3.46858100 | -1.43068900 |
| H  | -0.46544700 | -4.95018500 | 0.76865900  | P           | -3.17707800 | -0.80046100 | 0.86434400  |
| H  | -1.06084500 | -3.43903800 | 1.52884600  | C           | -2.78004900 | -2.40017400 | 1.66107600  |
| H  | -1.43884100 | -3.77493200 | -0.18108700 | C           | 0.68899500  | 1.63721700  | -3.13933400 |
| H  | 1.43544500  | -4.99657200 | -1.18462900 | C           | -3.66972500 | 0.24293000  | 2.27505700  |
| H  | 0.61891900  | -3.75591000 | -2.20256100 | C           | -4.72630700 | -1.12624500 | -0.04574600 |
| H  | 2.33029700  | -3.55930900 | -1.76024900 | H           | 0.29423800  | 4.59691800  | 0.37425600  |
| H  | 2.11541000  | -4.55171500 | 1.42739700  | H           | 0.39889700  | 3.96060100  | -2.00535900 |
| H  | 3.03828500  | -3.06267000 | 1.08891900  | H           | 1.84130200  | -0.96323600 | -0.37123200 |
| H  | 1.74780900  | -3.04167600 | 2.30952500  | H           | -0.18660200 | -1.81376700 | 0.67317700  |



|            |             |             |             |    |             |             |             |
|------------|-------------|-------------|-------------|----|-------------|-------------|-------------|
| H          | -1.72081600 | -2.81232600 | -1.28539000 | C  | -1.20977000 | 1.47835200  | -0.96950700 |
| H          | 1.59549800  | -0.72182200 | -3.04787700 | C  | -0.07931000 | 1.54776700  | -0.08139900 |
| H          | -1.09615700 | -0.74301900 | -2.77999500 | C  | -0.29646900 | 2.80149900  | 0.74086700  |
| H          | -0.51879900 | -2.23189800 | -3.58919400 | C  | -1.82579800 | 2.88166900  | 0.83419200  |
| H          | 0.09248300  | -4.34545700 | -2.01546400 | C  | -2.04720700 | 2.70811800  | -0.66967200 |
| H          | 0.65852900  | -3.82510100 | -0.42182600 | C  | 2.43217100  | -1.39993100 | 1.37521200  |
| H          | 2.49950300  | -2.71818100 | -1.52238500 | C  | 2.40354100  | -1.25232700 | 2.75112800  |
| H          | 1.81210600  | -3.16800300 | -3.08887300 | C  | 1.37918600  | -0.51849100 | 3.33395200  |
| H          | 0.40542500  | 2.55723500  | -3.66243200 | C  | 0.35608200  | 0.05994900  | 2.57848700  |
| H          | 1.69957100  | 1.37025300  | -3.47749600 | C  | 0.38730900  | -0.09538500 | 1.18091400  |
| H          | 0.00796500  | 0.85191300  | -3.48007600 | C  | -0.01556300 | 3.95322500  | -0.25866600 |
| H          | 0.49293600  | 2.82358400  | 2.12616800  | C  | -1.22908700 | 3.89951000  | -1.22160600 |
| H          | -4.45110800 | -0.24240800 | 2.87664900  | P  | -3.47699800 | -0.85377000 | -0.93569500 |
| H          | -2.77813200 | 0.42706800  | 2.88718400  | C  | -4.15652100 | 0.16509000  | -2.30539600 |
| H          | -4.02232600 | 1.20308800  | 1.88061100  | C  | -0.78463100 | 0.70257400  | 3.31465200  |
| H          | -5.50220000 | -1.52736700 | 0.62108200  | C  | -3.19245500 | -2.46031100 | -1.75828700 |
| H          | -5.06481200 | -0.18163100 | -0.48747300 | C  | -4.94835700 | -1.14212400 | 0.10823100  |
| H          | -4.53813300 | -1.84139000 | -0.85578300 | H  | 3.16812000  | -1.71762900 | 3.37013800  |
| H          | -3.64522900 | -2.77150100 | 2.22702600  | H  | 1.34146000  | -0.41764300 | 4.41945500  |
| H          | -2.49015400 | -3.14960300 | 0.91493600  | H  | 0.91306300  | 1.38644300  | -0.49696100 |
| H          | -1.93929300 | -2.24758800 | 2.34924300  | H  | -1.06308500 | 1.16013400  | -2.00528700 |
| Cl         | -2.97573500 | 2.24715200  | -0.54419300 | H  | -3.08834800 | 2.67464600  | -1.01110400 |
| C          | 0.87847000  | 0.30937300  | 1.86948300  | H  | 0.27930400  | 2.86801200  | 1.66995000  |
| O          | -0.04903400 | 0.11198100  | 2.64391800  | H  | -2.28150800 | 2.07884400  | 1.42595600  |
| N          | 2.10842800  | -0.26979200 | 2.10830200  | H  | -2.17122000 | 3.85574000  | 1.20789600  |
| C          | 2.14696000  | -1.21755500 | 3.21701500  | H  | -1.81761700 | 4.82597300  | -1.17245900 |
| H          | 3.18894900  | -1.41482900 | 3.48174800  | H  | -0.93826200 | 3.75170500  | -2.26986800 |
| H          | 1.62253600  | -0.79077000 | 4.07611600  | H  | 0.94782500  | 3.82770600  | -0.77213500 |
| H          | 1.64812900  | -2.16222600 | 2.95406000  | H  | 0.02769200  | 4.90939700  | 0.27901800  |
| C          | 3.27590500  | -0.10431000 | 1.31554600  | H  | -0.63415100 | 0.62555700  | 4.39828200  |
| C          | 3.99897200  | -1.23803900 | 0.92807800  | H  | -0.90932600 | 1.76513100  | 3.07512200  |
| C          | 3.72684600  | 1.15851800  | 0.92784700  | H  | -1.72532100 | 0.18901000  | 3.07135400  |
| C          | 5.14320000  | -1.11070000 | 0.15087600  | H  | 3.21682000  | -1.99131000 | 0.90741300  |
| H          | 3.64168100  | -2.22552100 | 1.22109500  | H  | -4.10482300 | -2.82278000 | -2.25215100 |
| C          | 4.86248000  | 1.27614000  | 0.13390100  | H  | -2.38952900 | -2.34835600 | -2.49685100 |
| H          | 3.18799700  | 2.04718100  | 1.24800100  | H  | -2.85933200 | -3.17435200 | -0.99635900 |
| C          | 5.57569800  | 0.14754700  | -0.25686800 | H  | -5.75748700 | -1.60871600 | -0.47049300 |
| H          | 5.69295100  | -2.00264700 | -0.14501600 | H  | -4.64913500 | -1.79539000 | 0.93589300  |
| H          | 5.20029900  | 2.26649500  | -0.16615800 | H  | -5.30139900 | -0.19008700 | 0.52277500  |
| H          | 6.46830600  | 0.24777800  | -0.87120000 | H  | -4.98938300 | -0.35527700 | -2.79804700 |
|            |             |             |             | H  | -4.52093800 | 1.12677000  | -1.92443000 |
| <b>TS6</b> |             |             |             | H  | -3.37283300 | 0.36191500  | -3.04721500 |
| Pd         | -1.51163300 | -0.25530400 | 0.17898300  | Cl | -1.93023200 | -2.26929400 | 1.50472800  |
| C          | 1.44538200  | -0.80751500 | 0.58209900  | C  | 1.46520300  | -1.01669400 | -0.89556600 |

|             |             |             |             |              |             |             |             |
|-------------|-------------|-------------|-------------|--------------|-------------|-------------|-------------|
| O           | 0.43802500  | -1.16694700 | -1.55131400 | H            | -3.96755000 | 1.19876600  | 1.69394400  |
| N           | 2.69339500  | -1.08602200 | -1.53322700 | H            | -3.64446900 | 2.23325000  | 0.28116500  |
| C           | 2.65736700  | -1.44998100 | -2.94512500 | Cl           | -0.87792500 | -2.35121500 | -1.08786600 |
| H           | 2.35987100  | -0.59612500 | -3.57077000 | C            | 1.99790400  | 0.92836200  | -1.73615600 |
| H           | 3.65073000  | -1.78668100 | -3.25626800 | O            | 2.32870100  | 1.01139300  | -2.90287400 |
| H           | 1.92872400  | -2.25052700 | -3.09493900 | N            | 1.31461500  | 1.98489200  | -1.11169800 |
| C           | 3.89143200  | -0.47958100 | -1.05582800 | C            | 0.65121800  | 2.95091900  | -1.96948700 |
| C           | 3.91255300  | 0.85765100  | -0.66113600 | H            | 0.61158200  | 3.92658000  | -1.47313900 |
| C           | 5.07205500  | -1.22343900 | -1.02110100 | H            | 1.23239300  | 3.02638900  | -2.89166500 |
| C           | 5.09310600  | 1.43361500  | -0.20587200 | H            | -0.37074200 | 2.63348500  | -2.23392000 |
| H           | 2.99702200  | 1.44720500  | -0.71092800 | C            | 0.98655000  | 1.93698200  | 0.25480300  |
| C           | 6.25386400  | -0.64023400 | -0.58182800 | C            | -0.36226100 | 1.93820400  | 0.67650300  |
| H           | 5.04681300  | -2.27114400 | -1.32082300 | C            | 2.00341300  | 1.89391200  | 1.21938000  |
| C           | 6.26707800  | 0.68891200  | -0.16744400 | C            | -0.65603000 | 1.81761400  | 2.05248000  |
| H           | 5.09604900  | 2.47550100  | 0.10959300  | H            | -1.14139400 | 2.23960500  | -0.02388200 |
| H           | 7.16754000  | -1.23151000 | -0.55300100 | C            | 1.69198700  | 1.79185500  | 2.56300800  |
| H           | 7.19176200  | 1.14257700  | 0.18437700  | H            | 3.03848800  | 1.91491700  | 0.88461300  |
|             |             |             |             | C            | 0.36078600  | 1.72588400  | 2.98734700  |
|             |             |             |             | H            | -1.69801300 | 1.83355800  | 2.36955200  |
| <b>INTf</b> |             |             |             | H            | 2.49578500  | 1.75255100  | 3.29581100  |
| Pd          | -0.58152600 | -0.30139100 | 0.06340500  | H            | 0.12563200  | 1.63101200  | 4.04511000  |
| C           | 2.31484800  | -0.24346000 | -0.87069600 |              |             |             |             |
| C           | 3.62201400  | -0.73578600 | -0.97118700 |              |             |             |             |
| C           | 4.05199900  | -1.72877500 | -0.10636900 | <b>INTf'</b> |             |             |             |
| C           | 3.17159500  | -2.23292300 | 0.84594200  | Pd           | -0.71713300 | 0.62456700  | -0.78615600 |
| C           | 1.84558200  | -1.79615600 | 0.92886900  | C            | -0.98613600 | -1.51242600 | -1.92650000 |
| C           | 1.42027300  | -0.79799000 | 0.04643100  | C            | -2.04496000 | -1.18359200 | -2.78188500 |
| P           | -3.01292700 | -0.10434500 | -0.14865900 | C            | -3.33997400 | -1.61227500 | -2.50056000 |
| C           | -4.01650200 | 1.25069500  | 0.59892600  | C            | -3.58113300 | -2.38873300 | -1.36904400 |
| C           | 0.91976000  | -2.41170900 | 1.93857900  | C            | -2.54721000 | -2.69996700 | -0.49124500 |
| C           | -3.46913900 | 0.03899300  | -1.91732800 | C            | -1.26297100 | -2.23420500 | -0.75247300 |
| C           | -3.94364800 | -1.58354700 | 0.39670400  | P            | -0.21371500 | 2.58942600  | 0.22608400  |
| H           | 5.07120300  | -2.10677200 | -0.16498300 | H            | -4.15953800 | -1.35568300 | -3.16976400 |
| H           | 3.50959300  | -3.00695900 | 1.53756100  | H            | -4.58960700 | -2.73945000 | -1.15508100 |
| H           | 1.47054600  | -3.03923600 | 2.65125500  | H            | -1.83191900 | -0.59734300 | -3.67484100 |
| H           | 0.37716900  | -1.64534200 | 2.51087800  | H            | 0.05876300  | -1.24495700 | -2.16090800 |
| H           | 0.16475600  | -3.03526900 | 1.44039900  | C            | 1.87493400  | 0.68399100  | -1.82898200 |
| H           | 4.28615900  | -0.30308400 | -1.71867000 | O            | 2.92813000  | 1.34500400  | -1.60831100 |
| H           | -4.55800400 | -0.00060200 | -2.05839700 | O            | 0.75182600  | 1.34126100  | -2.13512800 |
| H           | -3.08762700 | 0.98597900  | -2.32039900 | O            | 1.81186800  | -0.59011900 | -1.69007500 |
| H           | -2.99188400 | -0.78249300 | -2.46413100 | H            | -2.73524600 | -3.25767700 | 0.42533400  |
| H           | -5.00165700 | -1.51263000 | 0.10938600  | N            | -0.21293900 | -2.44088100 | 0.19719100  |
| H           | -3.48764200 | -2.46610600 | -0.06627400 | C            | -0.08471300 | -1.64990900 | 1.31587600  |
| H           | -3.87051900 | -1.68807000 | 1.48579200  | O            | 0.93564600  | -1.68109900 | 2.00684600  |
| H           | -5.06901500 | 1.16644700  | 0.29535800  | C            | -1.29162700 | -0.84197800 | 1.68629700  |



|   |             |             |             |            |             |             |             |
|---|-------------|-------------|-------------|------------|-------------|-------------|-------------|
| C | 3.68647600  | -0.37869700 | -1.62242100 | H          | -2.93634600 | -1.79764800 | 0.72099400  |
| H | 3.51023800  | 0.68696400  | -1.81178800 | H          | -2.83055900 | -2.68193800 | -0.81203200 |
| H | 4.75172300  | -0.53499400 | -1.40316100 | H          | -2.82980300 | -3.58777300 | 0.73515900  |
| H | 3.41793300  | -0.93892000 | -2.52608100 | C          | -0.13038200 | -4.20437300 | -0.23076600 |
| C | 3.32197100  | -2.58921900 | 0.11360200  | H          | -0.34277500 | -4.33447400 | -1.29910900 |
| H | 2.86918600  | -3.01531900 | 1.01857800  | H          | 0.95004900  | -4.32117500 | -0.08088100 |
| H | 3.09190600  | -3.25179500 | -0.73051900 | H          | -0.65296800 | -4.98921900 | 0.33363200  |
| H | 4.41218100  | -2.55687100 | 0.24852100  | C          | -0.37691100 | -2.58026700 | 2.12080200  |
| C | 3.36035600  | 0.06072100  | 1.16284300  | H          | 0.70149700  | -2.57434600 | 2.32918300  |
| H | 4.45042200  | -0.06521500 | 1.22128700  | H          | -0.81978600 | -1.68230900 | 2.57650000  |
| H | 3.11882200  | 1.11994400  | 1.00098600  | H          | -0.82697400 | -3.47446300 | 2.57476500  |
| H | 2.90718300  | -0.24825000 | 2.11394000  | Pd         | 0.29682300  | -0.46522400 | -0.44128000 |
| C | -1.34952700 | 1.05098100  | 1.79964000  |            |             |             |             |
| O | -1.76996700 | 0.58945000  | 2.85972600  | <b>TS8</b> |             |             |             |
| N | -0.13465800 | 1.69080900  | 1.75702800  | P          | -0.23992300 | 2.73244100  | -0.07589400 |
| C | 0.43621500  | 2.30638100  | 0.59445700  | C          | -1.95178600 | 3.11977100  | -0.62142500 |
| C | 0.75527400  | 3.66410600  | 0.65680500  | H          | -2.63794200 | 2.37296900  | -0.19902800 |
| C | 0.71101000  | 1.55247000  | -0.55673100 | H          | -2.26184900 | 4.12495600  | -0.30323600 |
| C | 1.33778500  | 4.29997400  | -0.43428400 | H          | -2.02193300 | 3.04524700  | -1.71332200 |
| H | 0.52791000  | 4.22339200  | 1.56560900  | C          | 0.66422600  | 4.22893900  | -0.66253700 |
| C | 1.25509900  | 2.22225700  | -1.65580500 | H          | 1.69331800  | 4.21629400  | -0.28134600 |
| C | 1.57771900  | 3.57840400  | -1.59904000 | H          | 0.71005500  | 4.23077100  | -1.75814700 |
| H | 1.58394000  | 5.35922000  | -0.37916200 | H          | 0.17544100  | 5.15421500  | -0.32556200 |
| H | 1.44527200  | 1.67045900  | -2.57951400 | C          | -0.36534700 | 3.08821600  | 1.72653500  |
| H | 2.01613500  | 4.07095400  | -2.46696700 | H          | -0.82672200 | 4.06716100  | 1.91988000  |
| C | 0.59993600  | 1.72474000  | 3.01160800  | H          | -0.96595800 | 2.30246200  | 2.20323500  |
| H | 1.58507300  | 2.16683700  | 2.83313300  | H          | 0.63246900  | 3.06574400  | 2.18271800  |
| H | 0.07025000  | 2.30567700  | 3.77789800  | C          | -0.85748100 | -1.37240200 | 1.97913300  |
| H | 0.72134200  | 0.70499800  | 3.40446100  | O          | -0.55631100 | -1.49142200 | 3.16170700  |
| C | -2.14305100 | 0.93111600  | 0.54204500  | N          | -1.92152800 | -0.56430700 | 1.59916300  |
| C | -1.59702500 | 0.32360900  | -0.59034400 | C          | -2.39429500 | -0.45706200 | 0.26782000  |
| C | -2.39147100 | 0.17011500  | -1.73629700 | C          | -3.76726500 | -0.46693100 | 0.01350900  |
| C | -3.48952200 | 1.30936700  | 0.57945900  | C          | -1.47359100 | -0.31222900 | -0.78663800 |
| H | -3.89991600 | 1.72222600  | 1.50059500  | C          | -4.24388700 | -0.35512600 | -1.28910400 |
| C | -4.27638000 | 1.15008300  | -0.55111300 | H          | -4.47006200 | -0.57988800 | 0.83862100  |
| H | -5.32108300 | 1.45731400  | -0.54173200 | C          | -1.97590400 | -0.23980400 | -2.09191800 |
| C | -3.72114500 | 0.59389200  | -1.70248800 | C          | -3.34492700 | -0.25082500 | -2.34578600 |
| H | -4.33692000 | 0.47769000  | -2.59674400 | H          | -5.31669300 | -0.36648200 | -1.47428000 |
| C | -1.82279800 | -0.45449500 | -2.97682600 | H          | -1.27909500 | -0.12480800 | -2.92297300 |
| H | -0.94807100 | 0.10680900  | -3.33612400 | H          | -3.70891900 | -0.16657500 | -3.36928500 |
| H | -1.47298700 | -1.48241000 | -2.78684600 | C          | -2.68232800 | 0.05250200  | 2.67065400  |
| H | -2.55967900 | -0.49322100 | -3.79007900 | H          | -3.11893800 | 0.99235400  | 2.31015400  |
| P | -0.66323900 | -2.52549700 | 0.30641300  | H          | -3.49047400 | -0.59669500 | 3.03897400  |
| C | -2.48991000 | -2.67274300 | 0.23067400  | H          | -2.00487200 | 0.24372500  | 3.50747300  |

|           |             |             |             |            |             |             |             |
|-----------|-------------|-------------|-------------|------------|-------------|-------------|-------------|
| C         | -0.18180500 | -2.15707300 | 0.91249500  | N          | 1.18957000  | 1.53749100  | 0.12997300  |
| C         | 0.13097500  | -1.61853900 | -0.34682000 | C          | 2.20965900  | 2.55889800  | 0.29570900  |
| C         | 0.68739900  | -2.46256700 | -1.32972800 | H          | 2.79425600  | 2.36898000  | 1.20363700  |
| C         | 0.14042500  | -3.48074300 | 1.22866000  | H          | 2.88506300  | 2.58775200  | -0.56916000 |
| H         | -0.07157900 | -3.84306300 | 2.23323700  | H          | 1.69872500  | 3.51879100  | 0.37877400  |
| C         | 0.70463300  | -4.30288600 | 0.26656400  | C          | 1.55224000  | 0.19247500  | 0.05546700  |
| H         | 0.94338200  | -5.33974900 | 0.49736400  | C          | 0.56495100  | -0.82006200 | -0.05883300 |
| C         | 0.95781900  | -3.79114900 | -1.00570300 | C          | 2.91157900  | -0.15077800 | 0.06961600  |
| H         | 1.39774900  | -4.43772300 | -1.76789200 | C          | 1.02379900  | -2.13282600 | -0.25974800 |
| C         | 1.00654300  | -1.94922500 | -2.70149200 | C          | 3.31715700  | -1.46552200 | -0.07826200 |
| H         | 0.09720100  | -1.86130800 | -3.31537900 | H          | 3.66647100  | 0.62165900  | 0.17793500  |
| H         | 1.45456100  | -0.94401400 | -2.65824500 | C          | 2.36833400  | -2.46288600 | -0.26753400 |
| H         | 1.69603500  | -2.61751300 | -3.23392200 | H          | 0.30959700  | -2.92402500 | -0.44564500 |
| P         | 2.76553500  | 0.45498700  | 0.13009500  | H          | 4.37925300  | -1.70357400 | -0.06870900 |
| C         | 3.44902600  | -1.20411800 | 0.51755900  | H          | 2.67053700  | -3.49565700 | -0.42789900 |
| H         | 2.90532600  | -1.62555900 | 1.37279500  |            |             |             |             |
| H         | 3.28198200  | -1.87713400 | -0.33370900 | <b>TS9</b> |             |             |             |
| H         | 4.52236800  | -1.16047800 | 0.74926300  | Pd         | -0.88164800 | 0.23065400  | -0.15463200 |
| C         | 3.97274400  | 1.06420600  | -1.12050500 | Cl         | -0.08332900 | -2.31705500 | 0.65372800  |
| H         | 3.88484600  | 0.46414200  | -2.03472300 | C          | 0.43734400  | -0.52277100 | 1.41399000  |
| H         | 3.74666300  | 2.10649000  | -1.37829400 | O          | -0.19741900 | -0.20272700 | 2.39521700  |
| H         | 5.00618100  | 1.00092800  | -0.75119500 | N          | 1.80957900  | -0.33049100 | 1.27881900  |
| C         | 3.28886900  | 1.40864600  | 1.61546600  | P          | -3.11994500 | -0.73399000 | -0.39277300 |
| H         | 3.12870500  | 2.48097100  | 1.44281900  | P          | 0.15461300  | 2.32969900  | -0.25765600 |
| H         | 2.67967200  | 1.10535500  | 2.47650200  | C          | 0.22146200  | 3.15049700  | 1.38781800  |
| H         | 4.35005900  | 1.24515600  | 1.85098800  | H          | 0.84804500  | 2.55742700  | 2.06466900  |
| Pd        | 0.41960400  | 0.43788100  | -0.38010300 | H          | 0.62912700  | 4.16907000  | 1.31536700  |
|           |             |             |             | H          | -0.78507100 | 3.19004500  | 1.82062500  |
| <b>3a</b> |             |             |             | C          | -0.74770000 | 3.59782300  | -1.24200400 |
| C         | -1.15144300 | 0.93344300  | -0.11495900 | H          | -1.79210300 | 3.63712800  | -0.90921600 |
| C         | -2.46322500 | 1.40563000  | -0.19059100 | H          | -0.29535400 | 4.59460000  | -1.13565600 |
| C         | -3.51652300 | 0.51737300  | -0.14133000 | H          | -0.74237800 | 3.31387800  | -2.30124200 |
| C         | -3.24222800 | -0.83513400 | 0.03723500  | C          | 1.87691600  | 2.61705600  | -0.84479800 |
| C         | -1.94727600 | -1.34222900 | 0.11329900  | H          | 1.97068200  | 2.31651400  | -1.89533000 |
| C         | -0.85269400 | -0.44350700 | -0.02175100 | H          | 2.15292300  | 3.67681900  | -0.74732500 |
| C         | -1.83288300 | -2.81376900 | 0.40622400  | H          | 2.57686200  | 2.00482700  | -0.26229300 |
| H         | -4.54543600 | 0.86639900  | -0.20175400 | C          | -3.67128500 | -1.21564800 | 1.29519100  |
| H         | -4.07115700 | -1.53632500 | 0.13959700  | H          | -4.64685600 | -1.72246200 | 1.27557800  |
| H         | -2.78690600 | -3.18621300 | 0.79809500  | H          | -2.91685800 | -1.88038500 | 1.73398300  |
| H         | -1.60548600 | -3.41554600 | -0.48523000 | H          | -3.73541800 | -0.32310500 | 1.92909700  |
| H         | -1.06310700 | -3.03090700 | 1.15692200  | C          | -4.60384400 | 0.17726100  | -0.99867700 |
| H         | -2.60996900 | 2.47982400  | -0.26891700 | H          | -5.52100600 | -0.41380200 | -0.86215100 |
| C         | -0.11354600 | 1.97847400  | -0.06038500 | H          | -4.70485300 | 1.12169100  | -0.45046200 |
| O         | -0.37703000 | 3.17111400  | -0.12530000 | H          | -4.48924900 | 0.41358700  | -2.06334100 |



1. S. Song, X. Sun, X. Li, Y. Yuan and N. Jiao, *Org. Lett.*, 2015, **17**, 2886.
2. T. Muraki, H. Togo and M. Yokoyama, *Synlett.*, 1998, 286.
3. T. Iwai, T. Fujihara, J. Terao, Y. Tsuji, *J. Am. Chem. Soc.*, 2010, **132**, 9602.
4. H. Iwasaki, T. Eguchi, N. Tsutsui, H. Ohno, T. Tanaka, *J. Org. Chem.*, 2008, **73**, 7145.
5. Z. Yang, B. Yu, H. Zhang, Y. Zhao, G. Ji, Z. Ma, X. Gao, Z. Liu, *Green Chem.*, 2015, **17**, 4189;
6. H. Nishioka, C. Nagura, H. Abe, Y. Takeuchi, and T. Harayama, *Heterocycles*, 2006, **70**, 549.
7. B. Li, B. Han, Z.-J. Shi, Y.-W. Ren, S.-C. Lu and W. Zhang, *Tetrahedron Lett.*, 2010, **51**, 3748.
8. (a) B. S. Bhakuni, A. Kumar, S. J. Balkrishna, J. A. Sheikh, S. Konar and S. Kumar, *Org. Lett.*, 2012, **14**, 2838; (b) D. Liang, Z. Hu, J. Peng, J. Huang and Q. Zhu, *Chem. Commun.*, 2013, **49**, 173.
9. M. Catellani and L. Ferioli, *Synthesis*, 1996, **6**, 769.
10. Z. Guan, H. Lei, M. Chen, Z. Ren, Y. Bai and Y. Wang, *Adv. Synth. Catal.*, 2012, **354**, 489.
11. M. J. Frisch, G. W. Trucks, H. B. Schlegel, G. E. Scuseria, M. A. Robb, J. R. Cheeseman, G. Scalmani, V. Barone, B. Mennucci, G. A. Petersson, H. Nakatsuji, M. Caricato, X. Li, H. P. Hratchian, A. F. Izmaylov, J. Bloino, G. Zheng, J. L. Sonnenberg, M. Hada, M. Ehara, K. Toyota, R. Fukuda, J. Hasegawa, M. Ishida, T. Nakajima, Y. Honda, O. Kitao, H. Nakai, T. Vreven, J. A. Montgomery, Jr., J. E. Peralta, F. Ogliaro, M. Bearpark, J. J. Heyd, E. Brothers, K. N. Kudin, V. N. Staroverov, R. Kobayashi, J. Normand, K. Raghavachari, A. Rendell, J. C. Burant, S. S. Iyengar, J. Tomasi, M. Cossi, N. Rega, J. M. Millam, M. Klene, J. E. Knox, J. B. Cross, V. Bakken, C. Adamo, J. Jaramillo, R. Gomperts, R. E. Stratmann, O. Yazyev, A. J. Austin, R. Cammi, C. Pomelli, J. W. Ochterski, R. L. Martin, K. Morokuma, V. G. Zakrzewski, G. A. Voth, P. Salvador, J. J. Dannenberg, S. Dapprich, A. D. Daniels, Ö. Farkas, J. B. Foresman, J. V. Ortiz, J. Cioslowski, and D. J. Fox, *Gaussian 09*, Revision A.01, Gaussian, Inc., Wallingford CT, 2009.
12. Y. Zhao and D. G. Truhlar, *Theor. Chem. Account*, 2008, **120**, 215.
13. (a) J. P. Hay and W. R. Wadt, *J. Chem. Phys.*, 1985, **82**, 299; (b) R. A. Friesner, R. B. Murphy, M. D. Beachy, M. N. Ringlanda, W. T. Pollard, B. D. Dunietz and Y. X. Cao, *J. Phys. Chem. A*, 1999, **103**, 1913.
14. (a) K. Fukui, *J. Phys. Chem.*, 1970, **74**, 4161; (b) C. Gonzalez and H. B. Schlegel, *J. Chem. Phys.*, 1989, **90**, 2154; (c) C. Gonzalez and H. B. Schlegel, *J. Phys. Chem.*, 1990, **94**, 5523.
15. (a) V. Barone and M. Cossi, *J. Phys. Chem. A* 1998, **102**, 1995; (b) M. Cossi, N. Rega, G. Scalmani and V. Barone, *J. Comput. Chem.* 2003, **24**, 669.

# NMR spectra

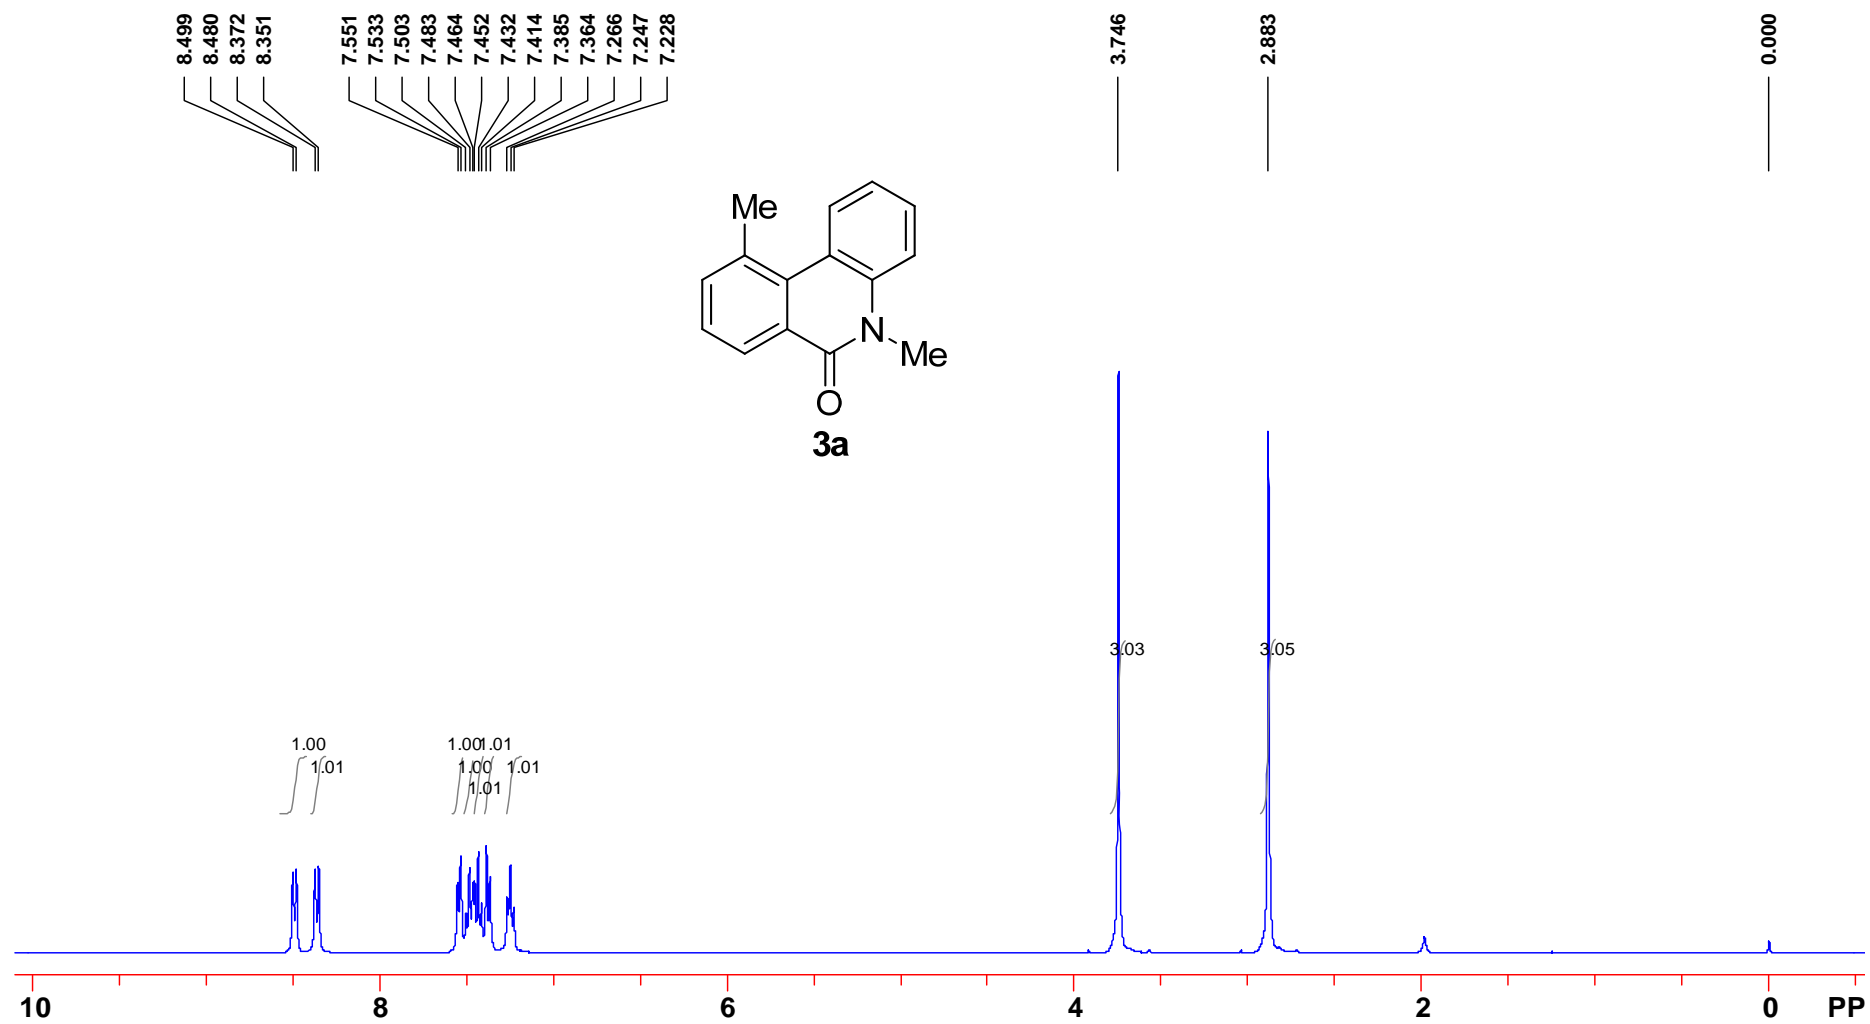



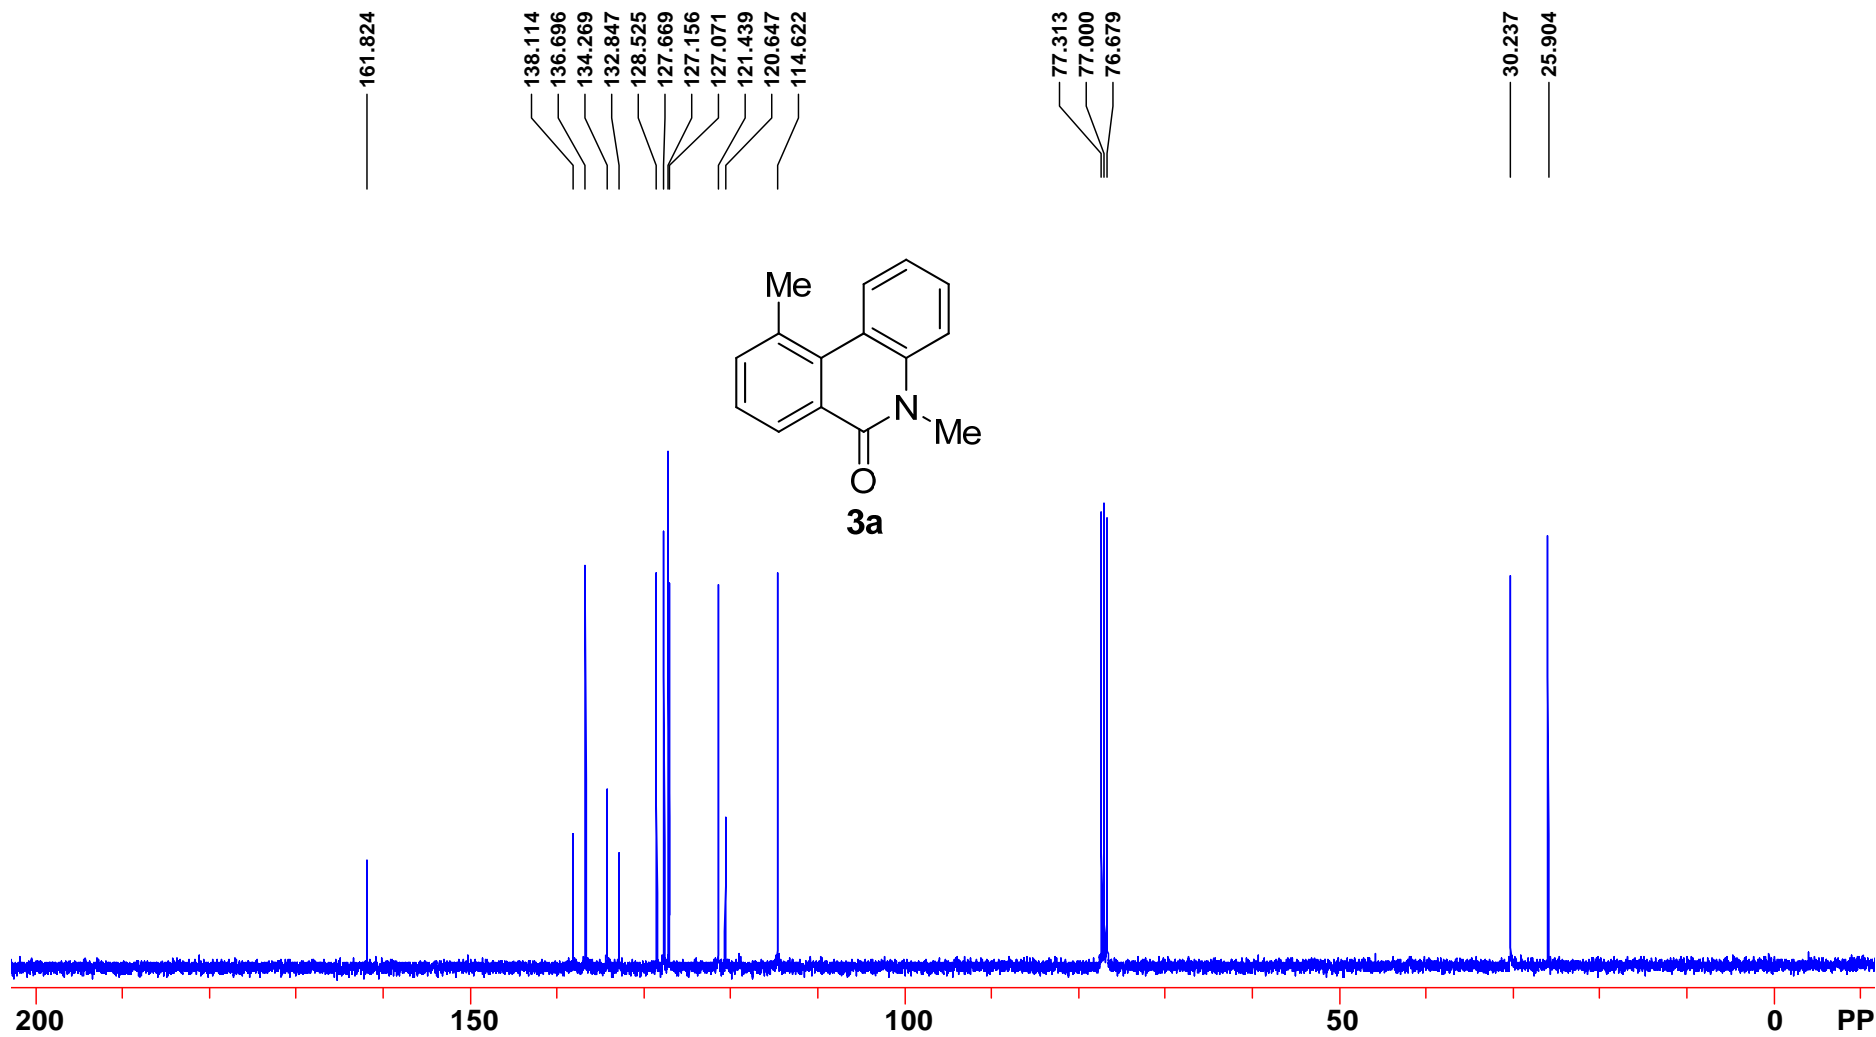

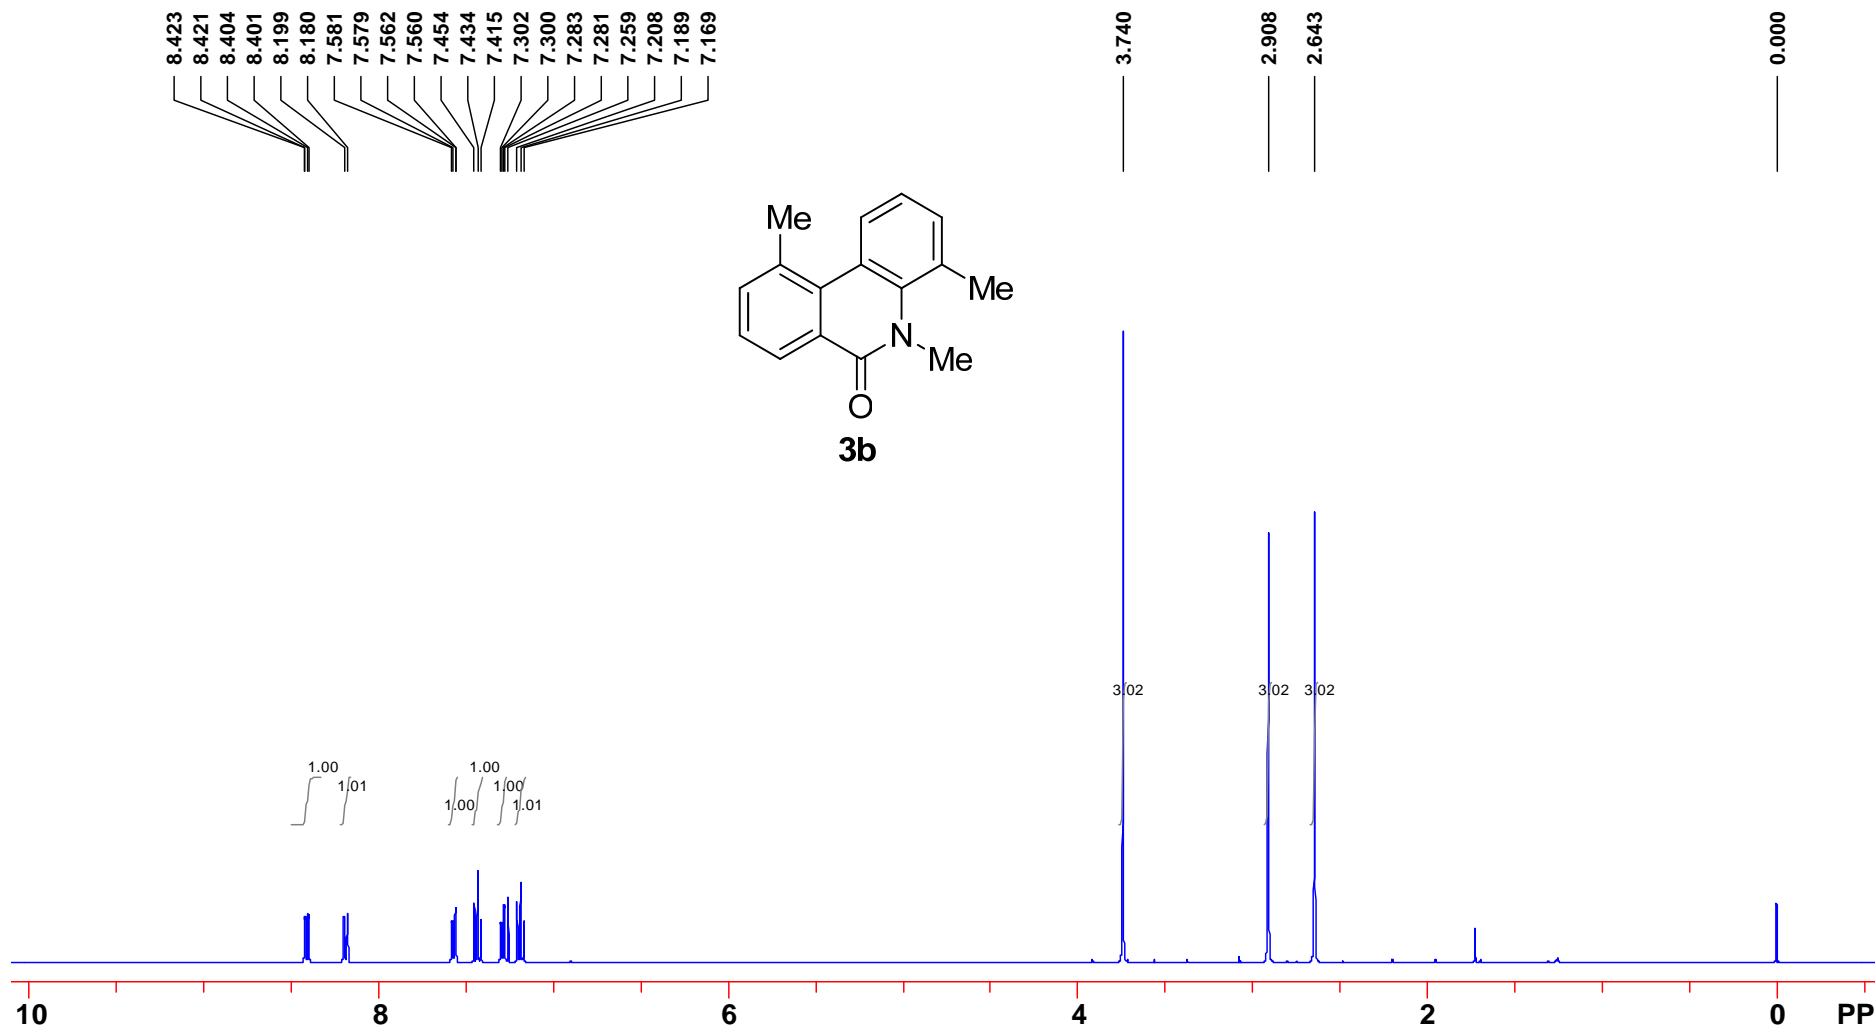

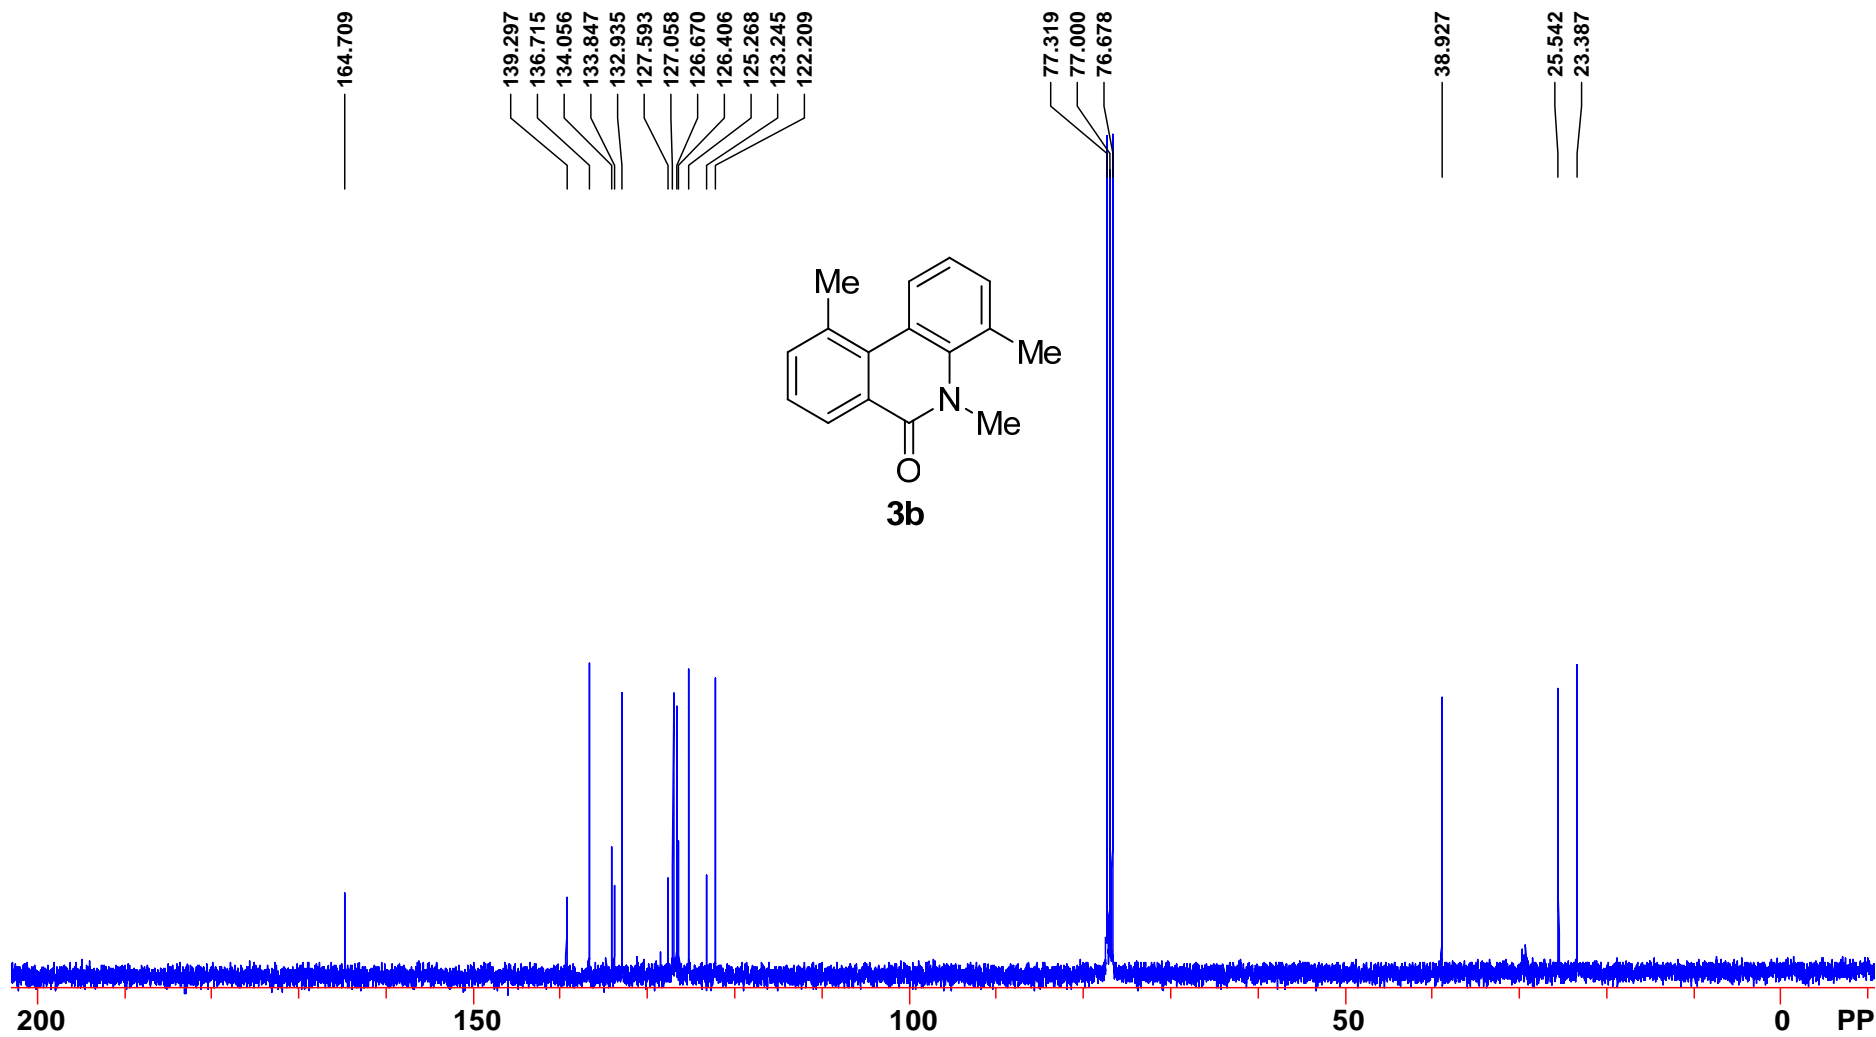

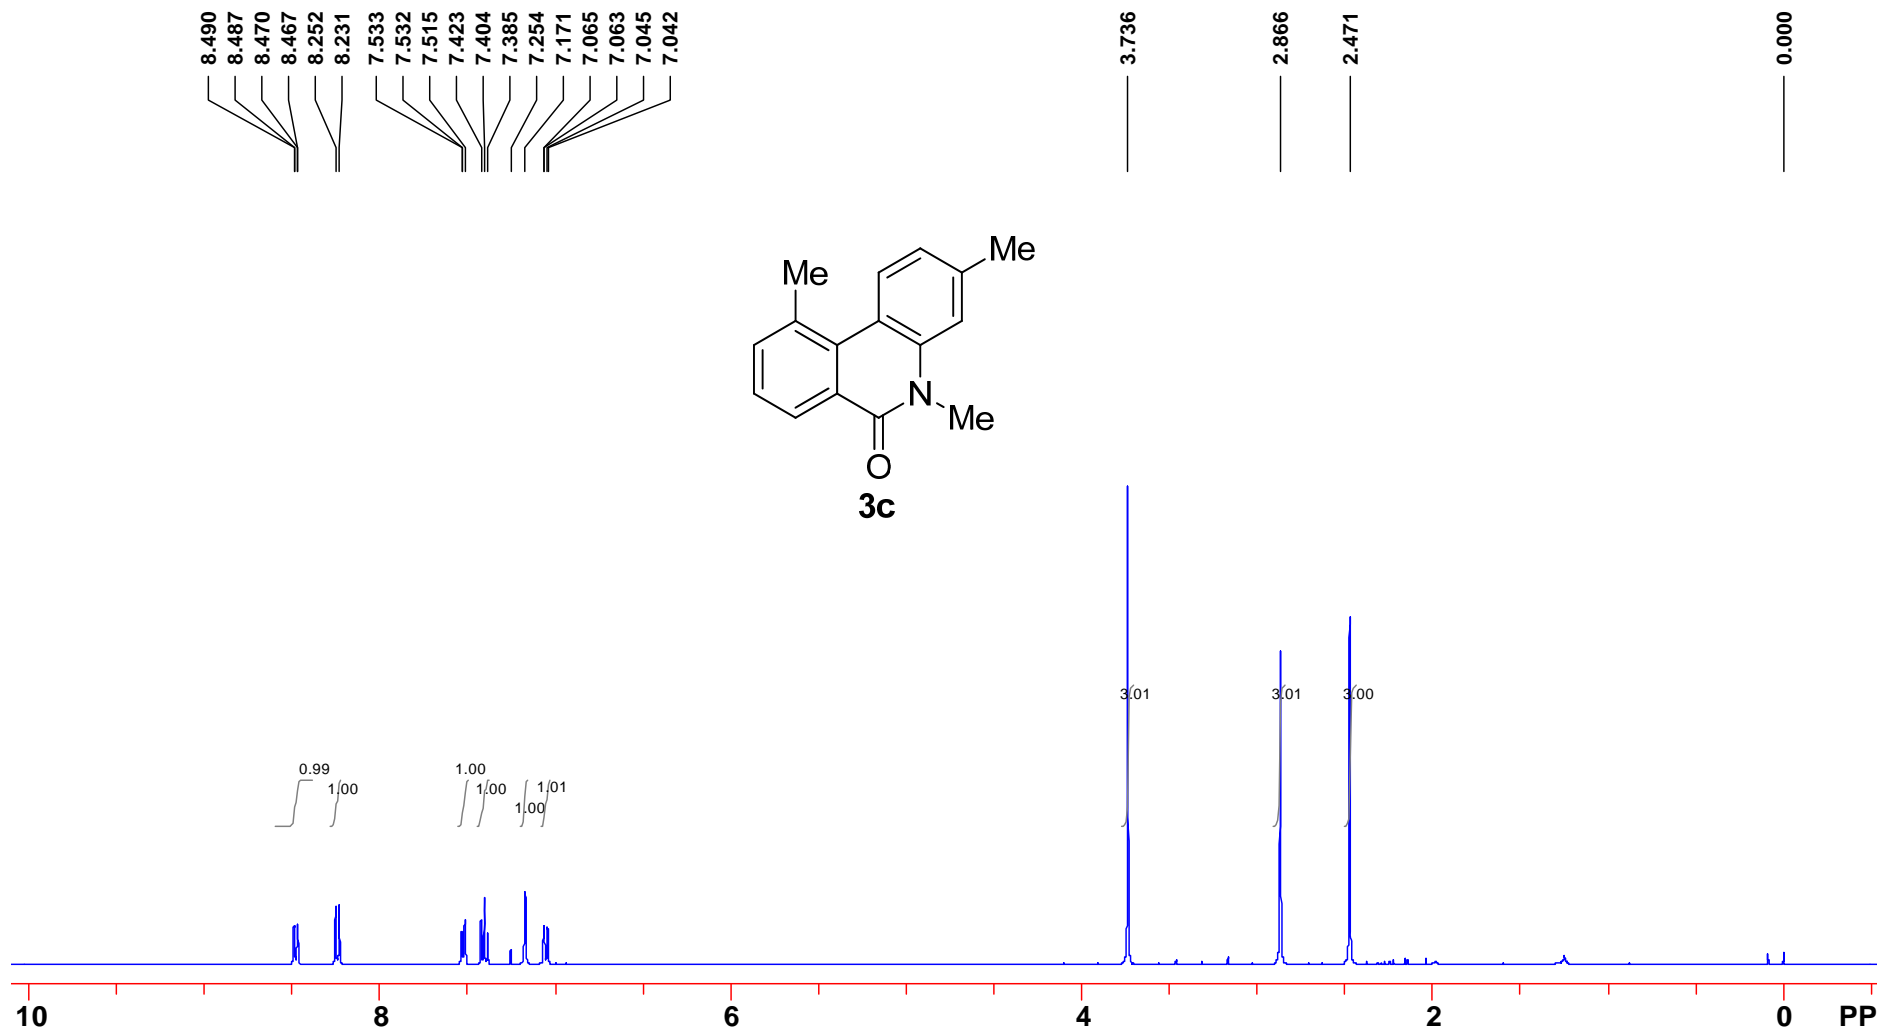

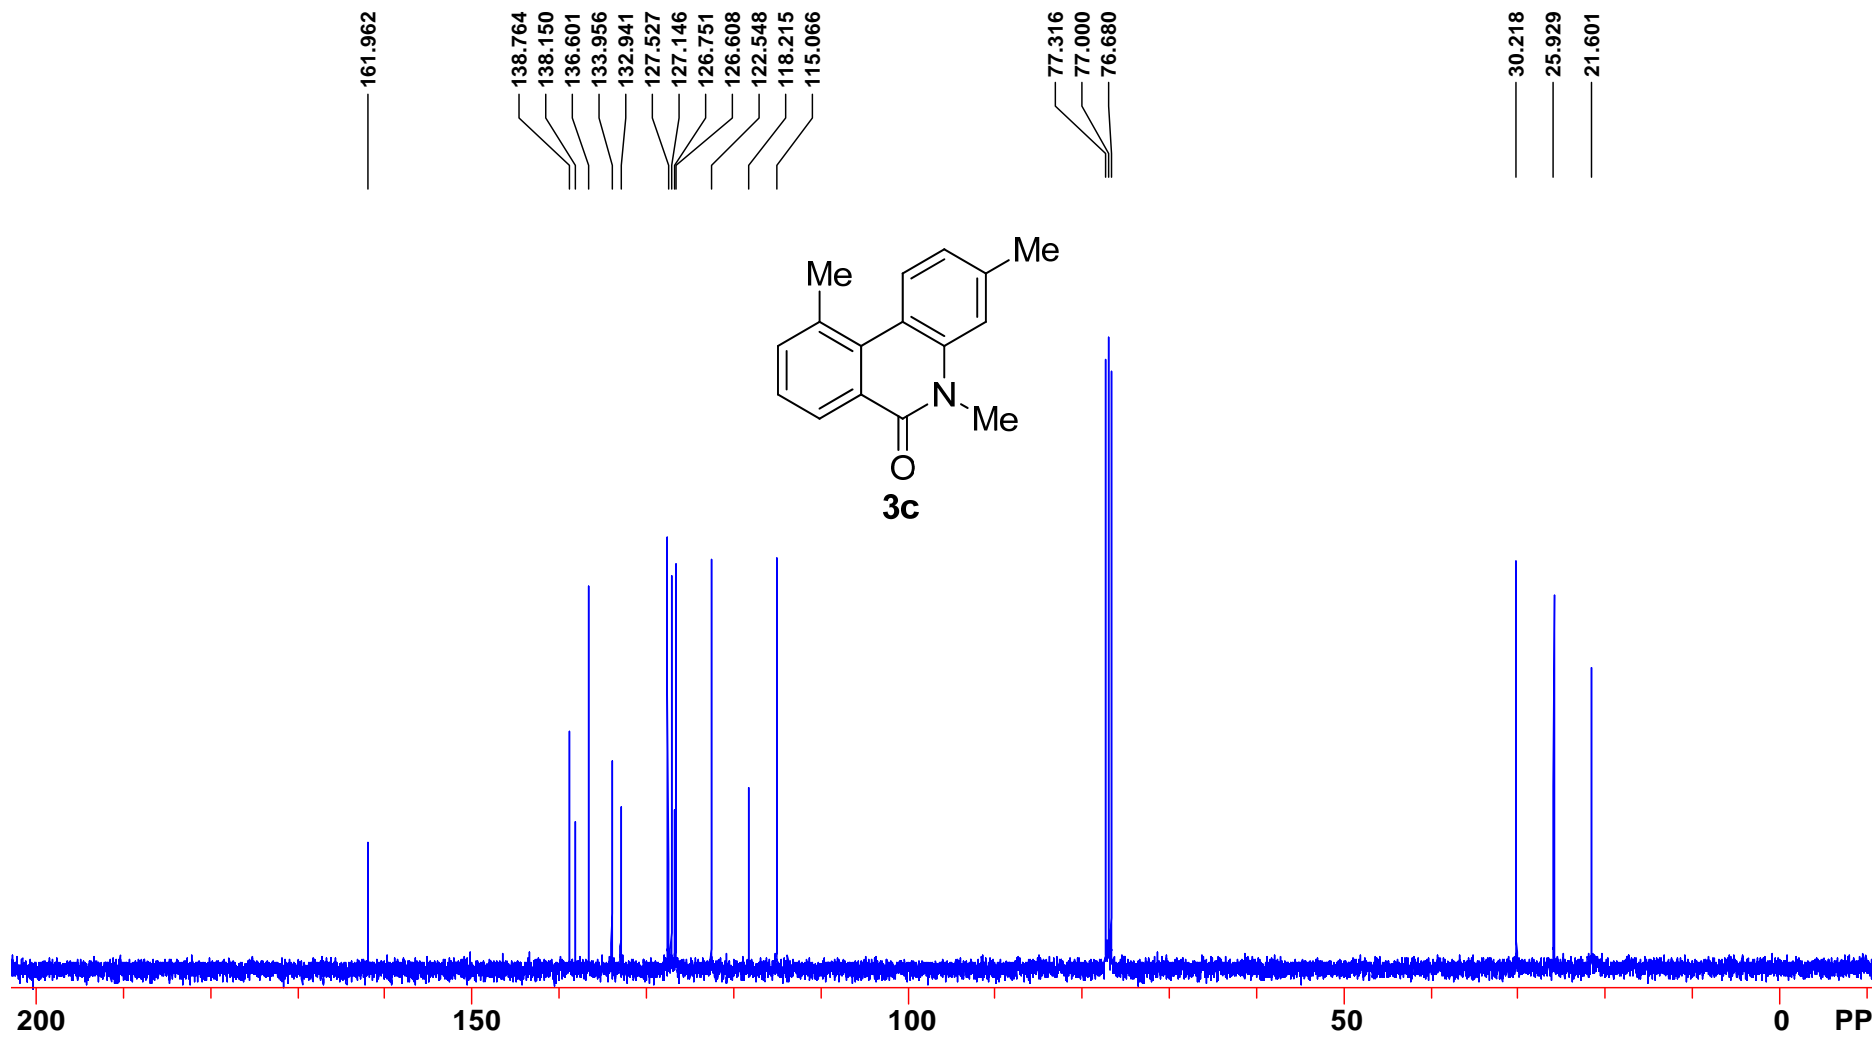

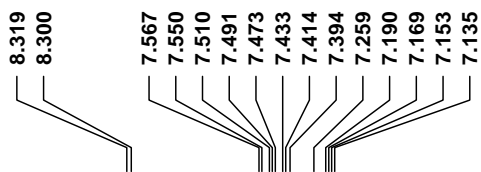

3.670

2.449

0.000

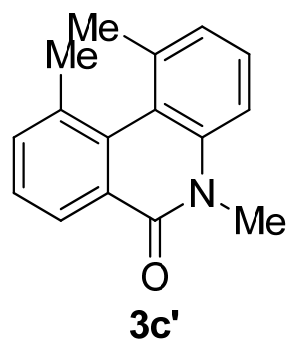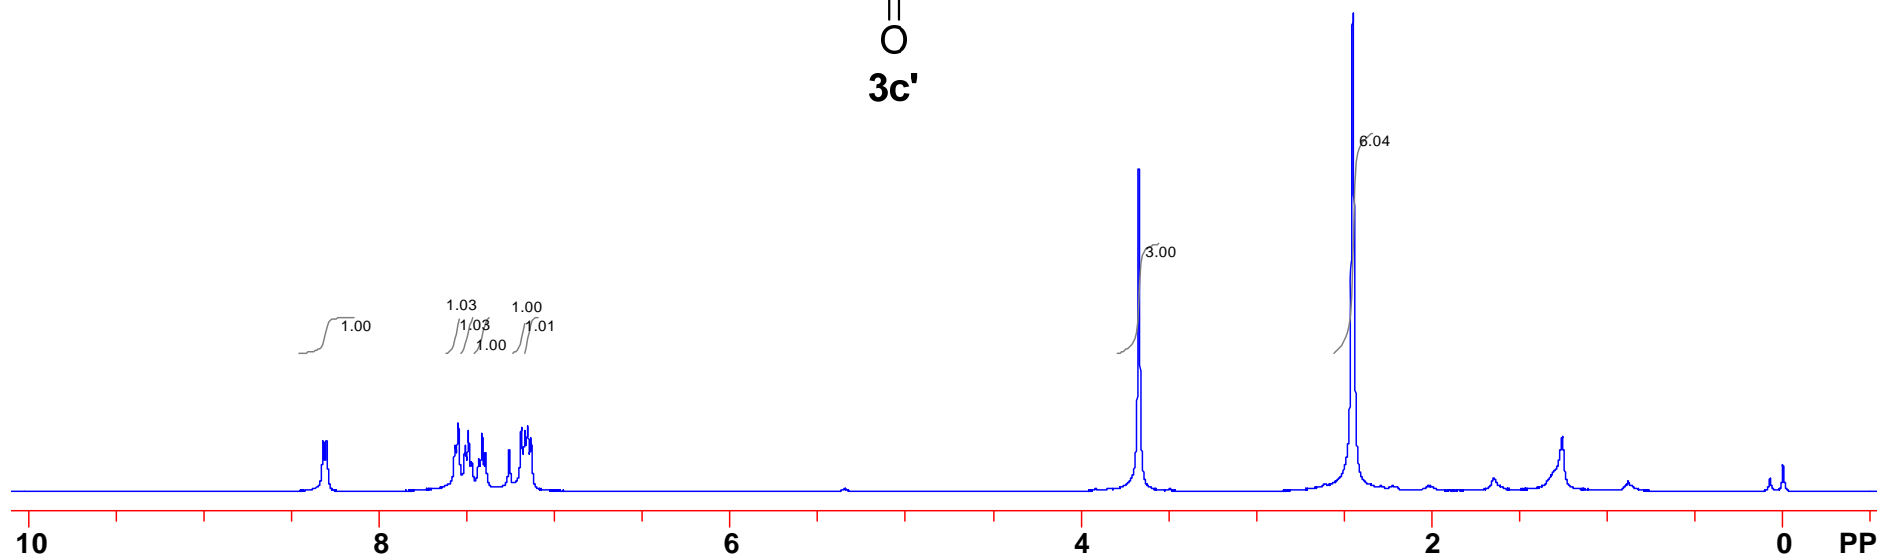

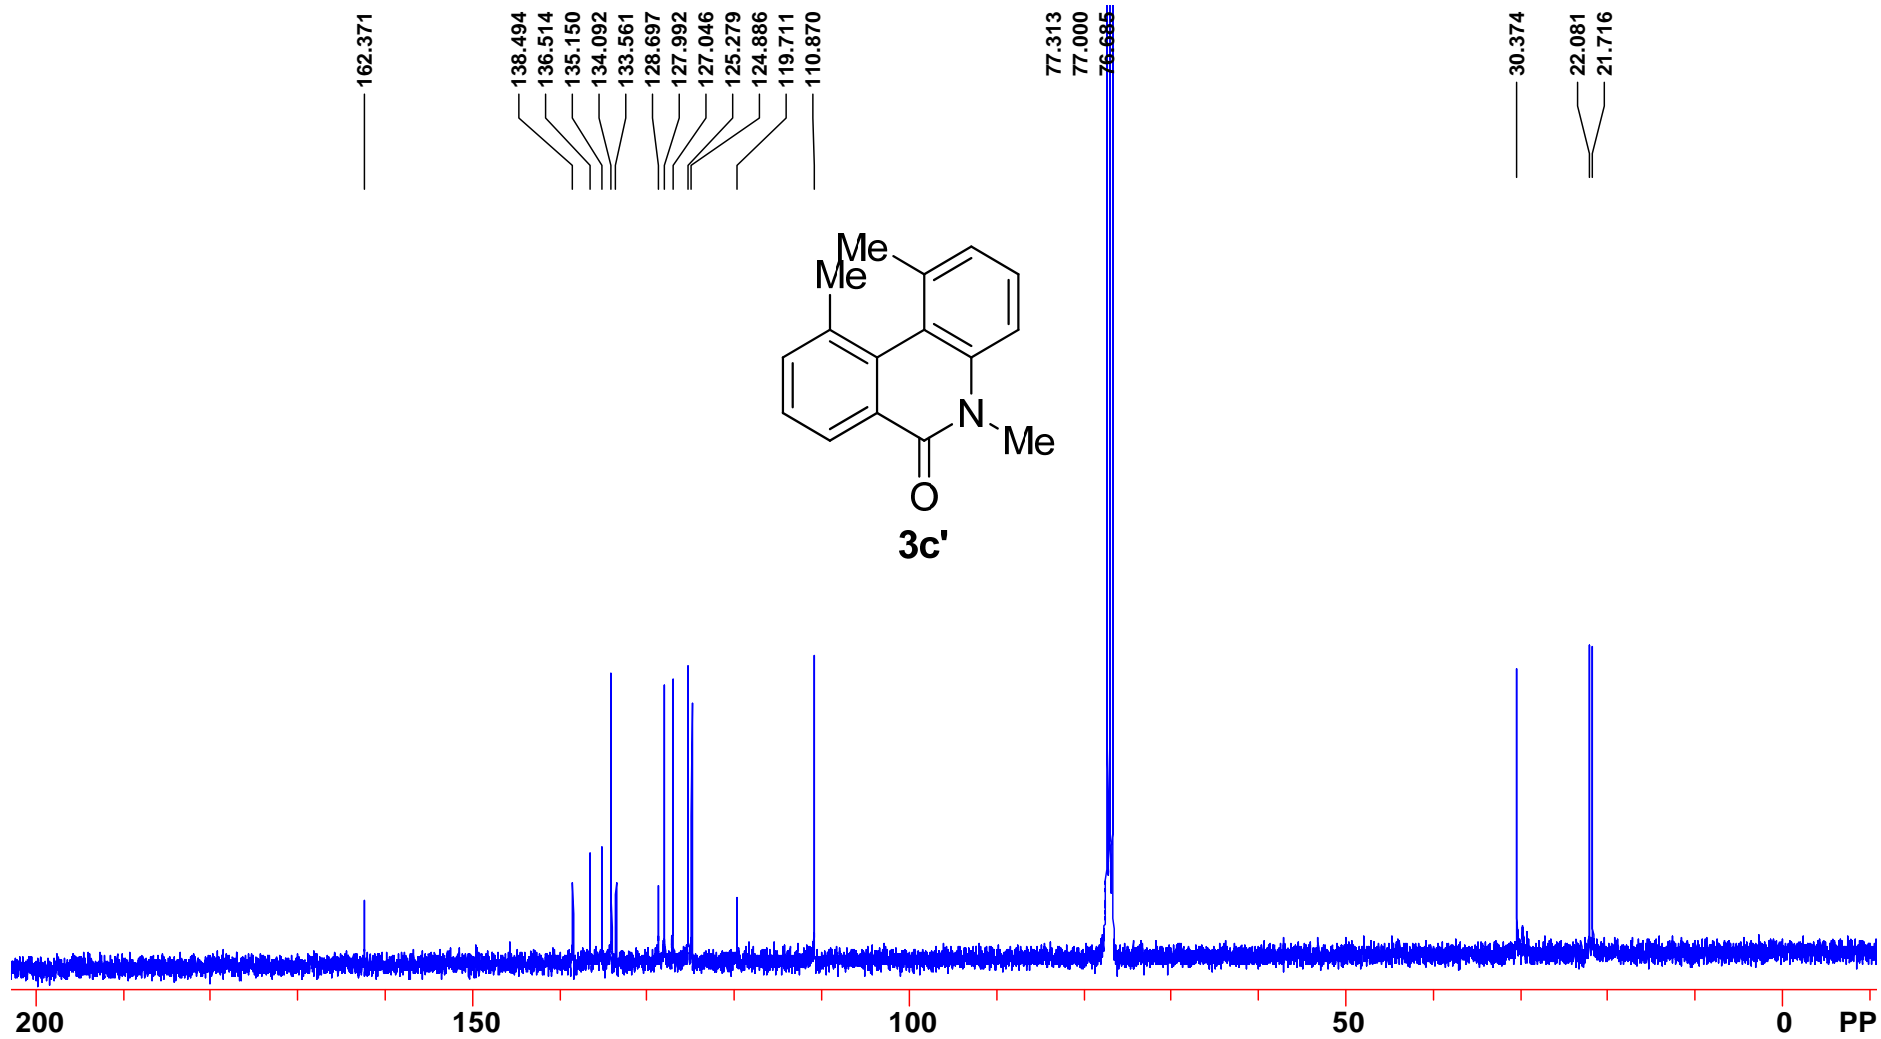

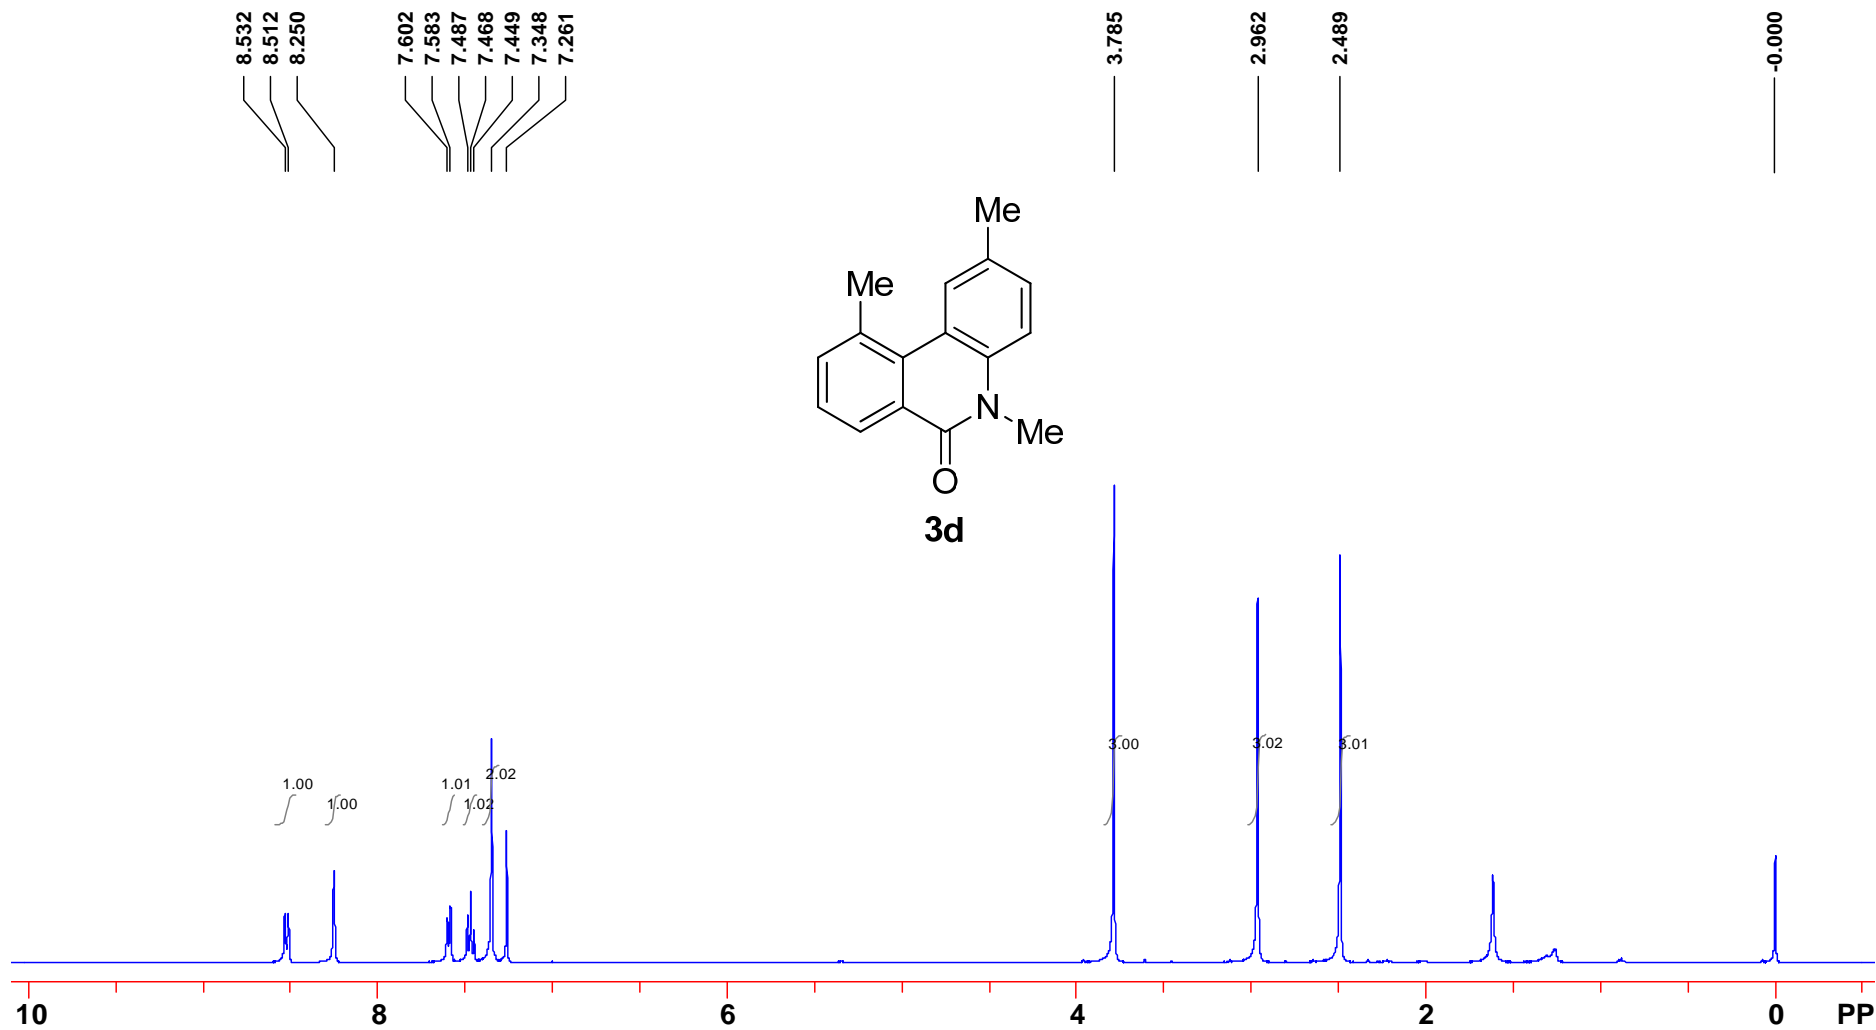



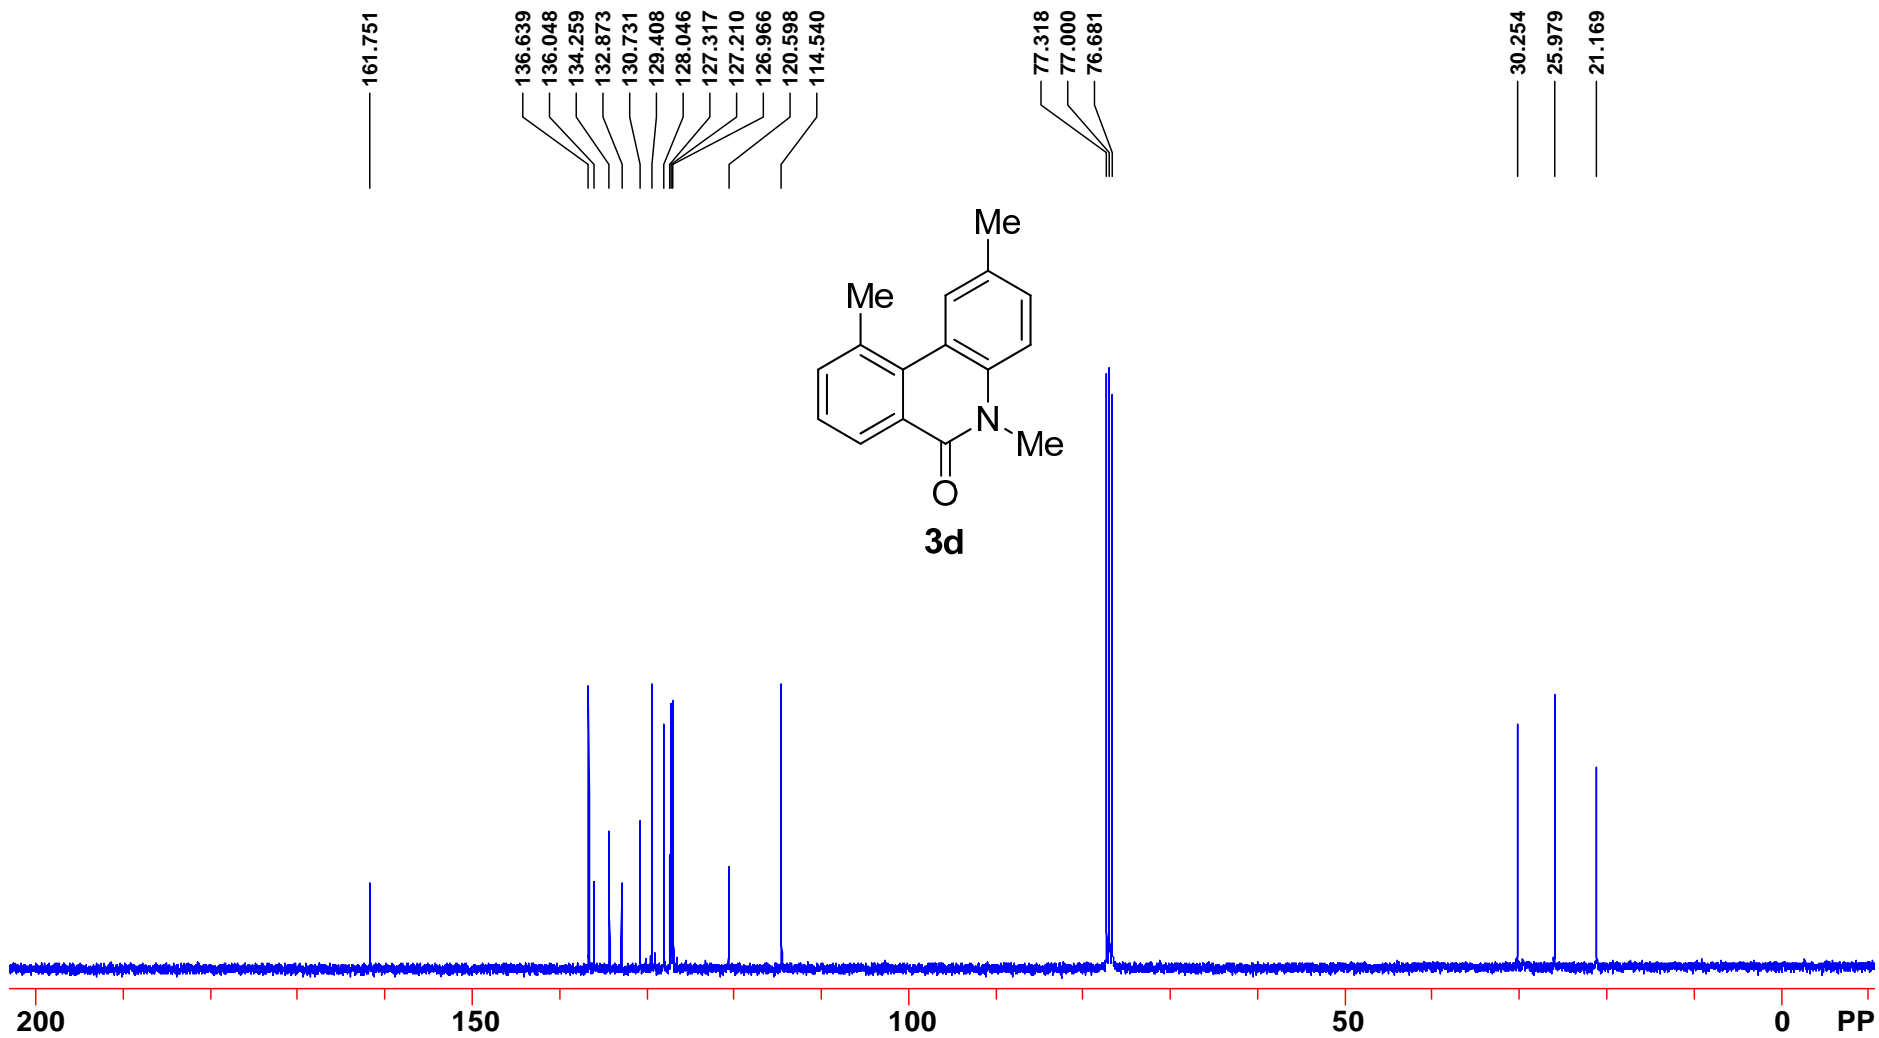

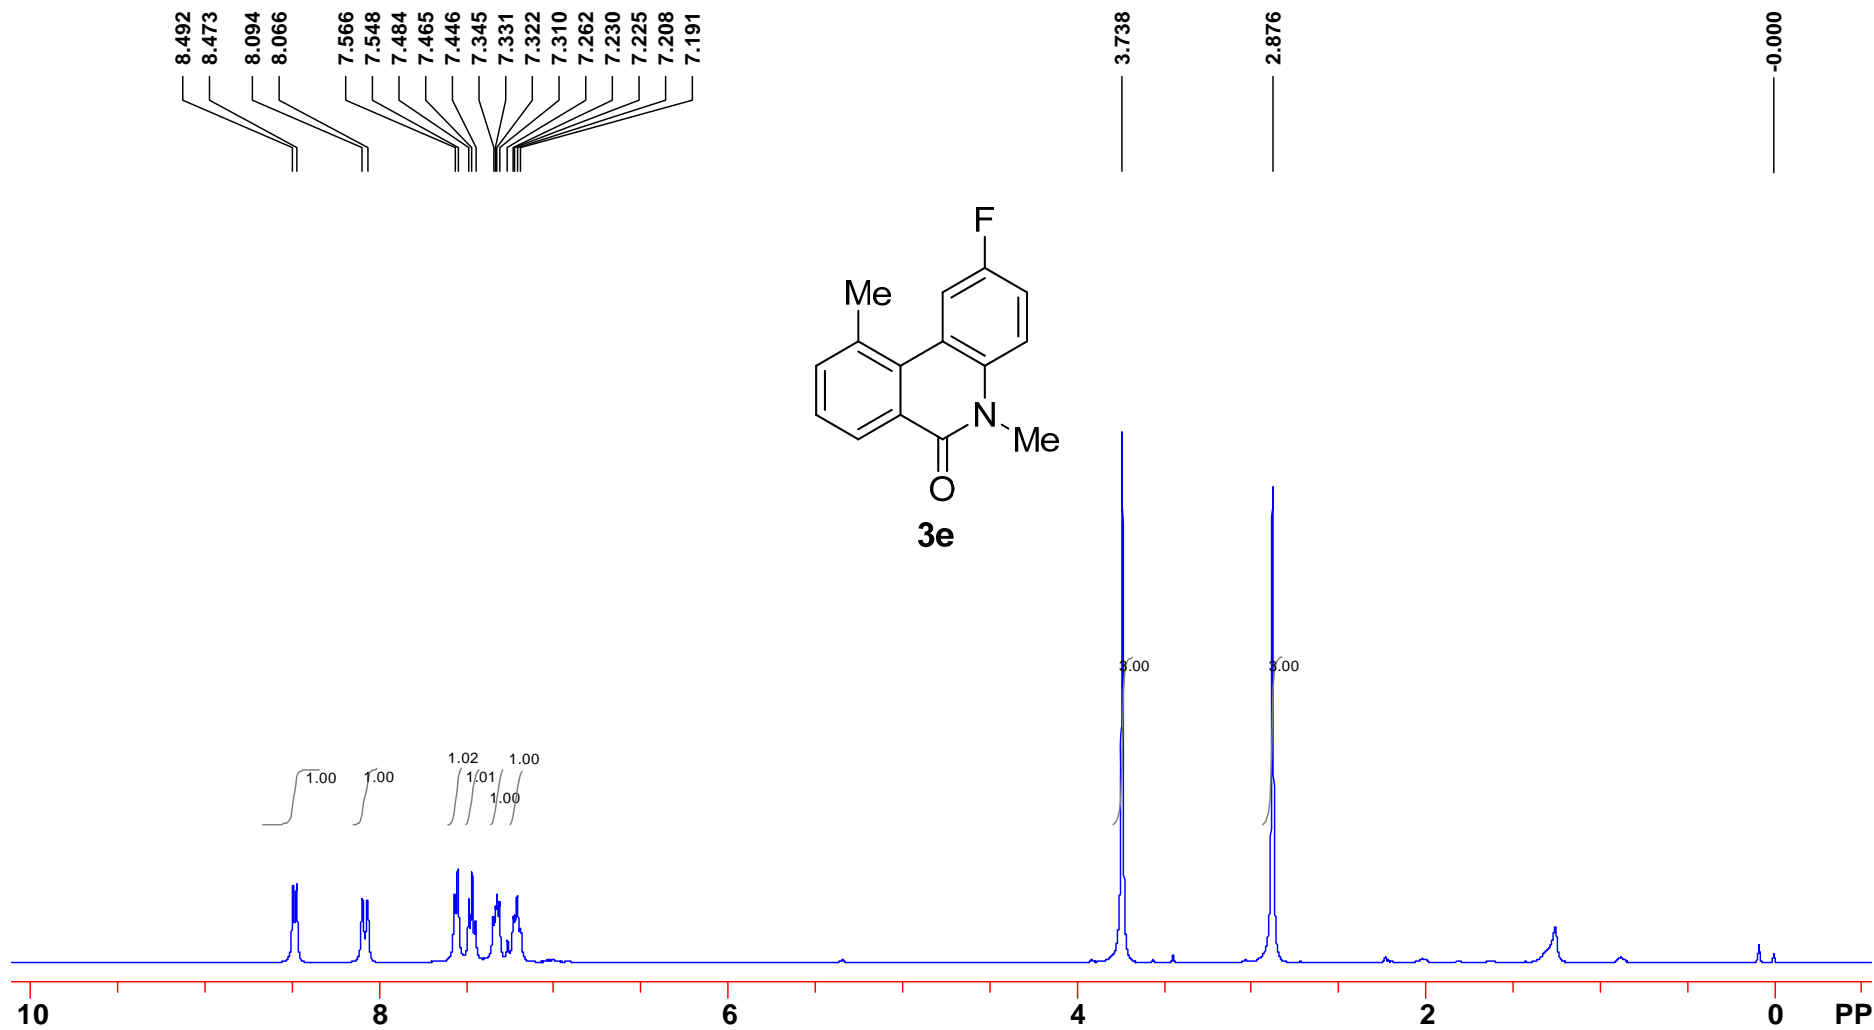

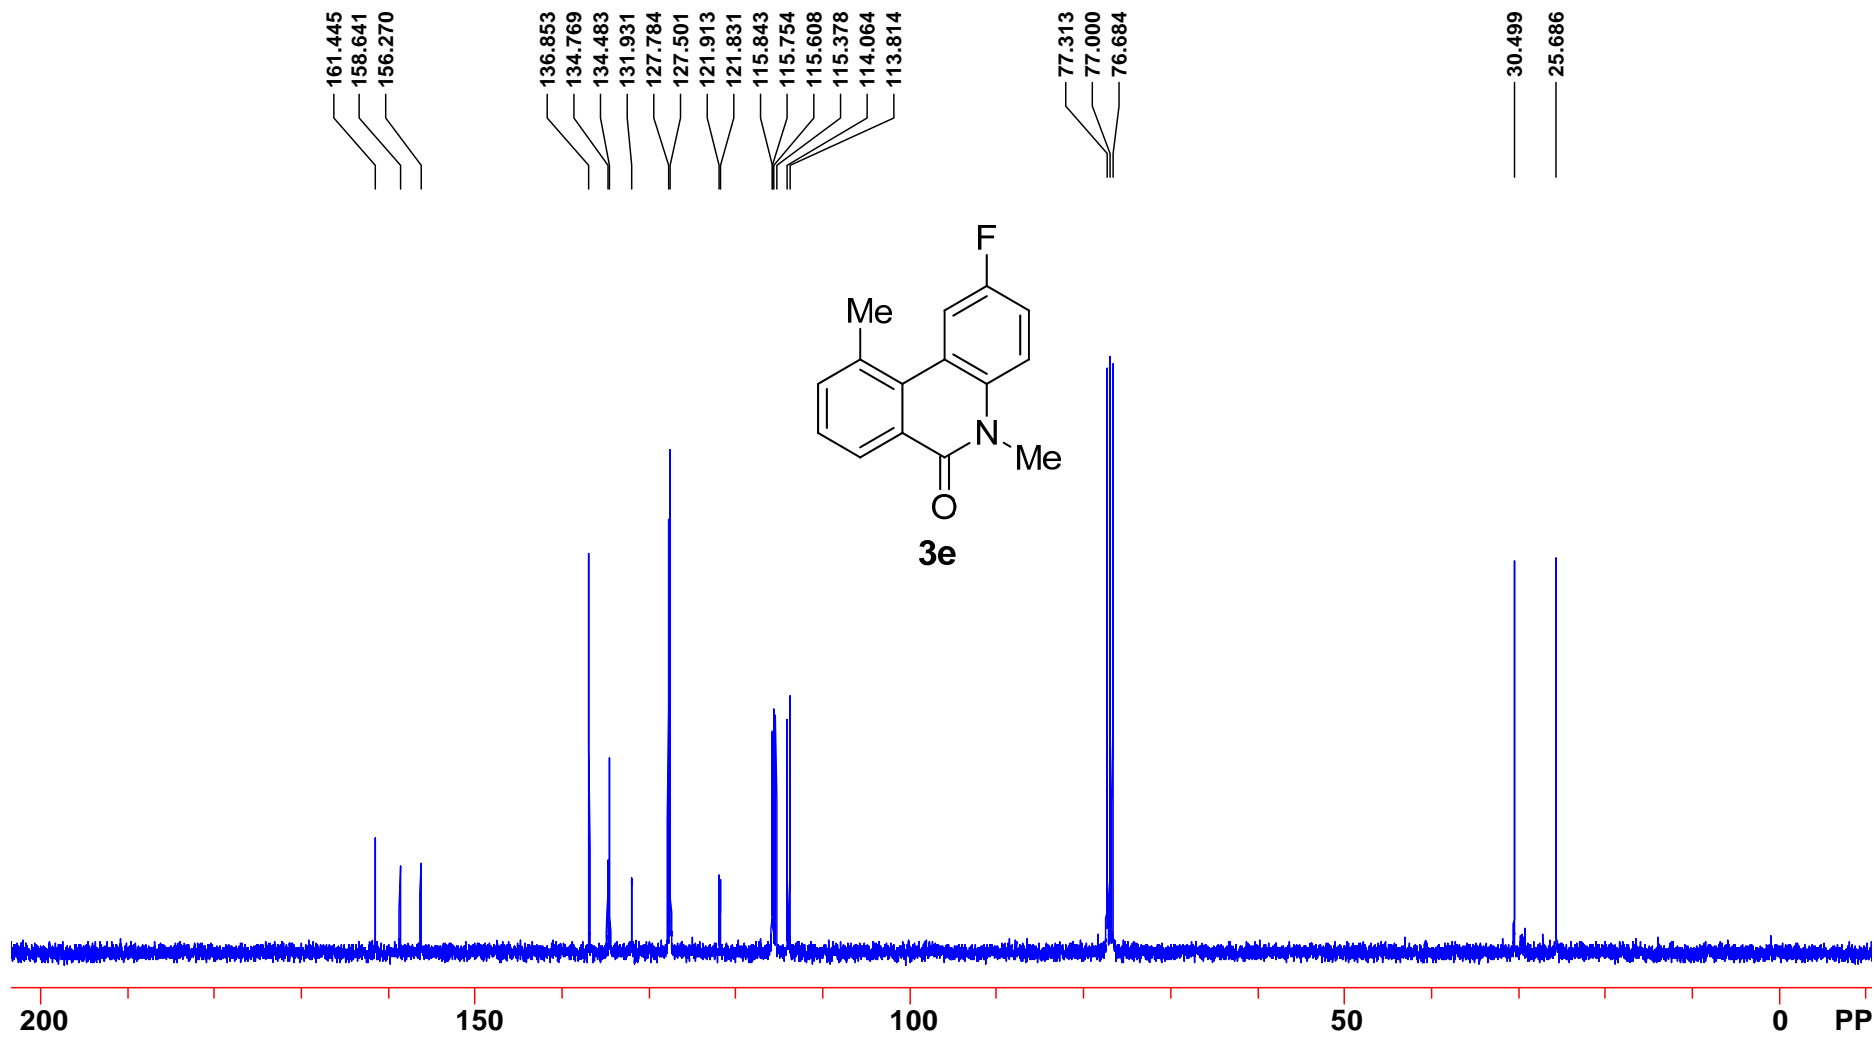

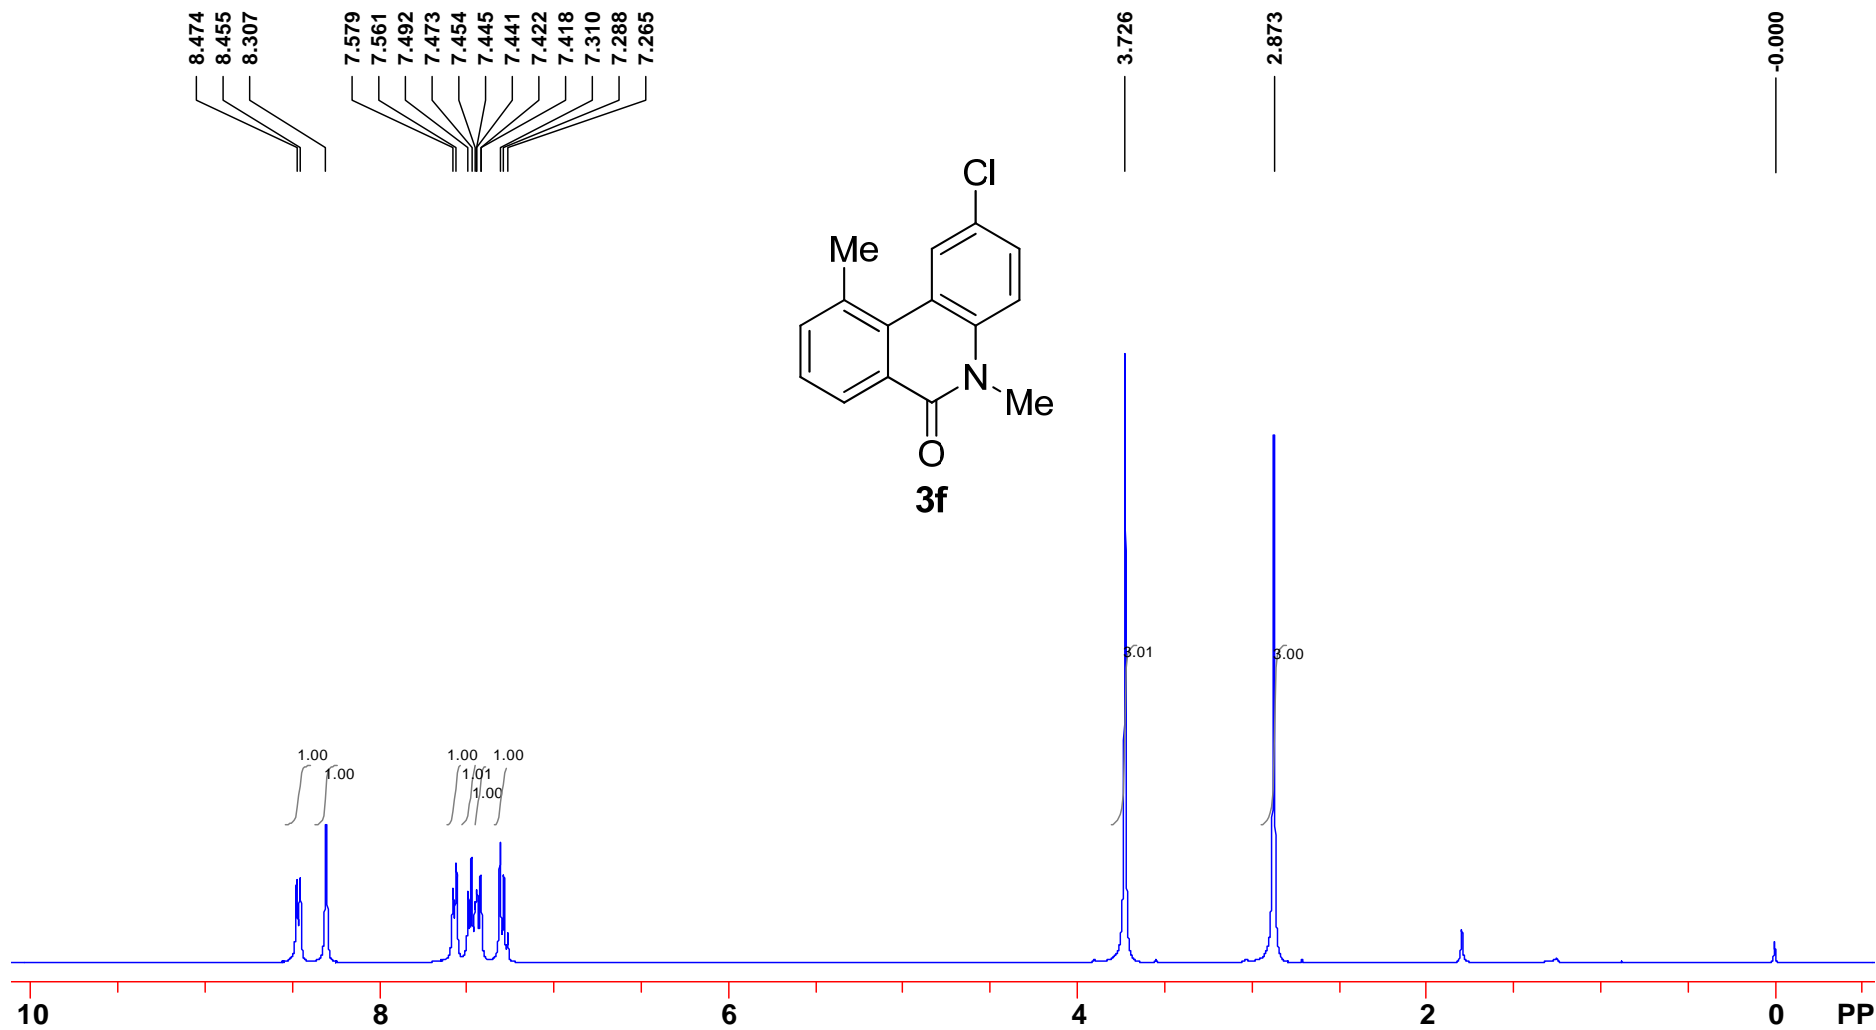

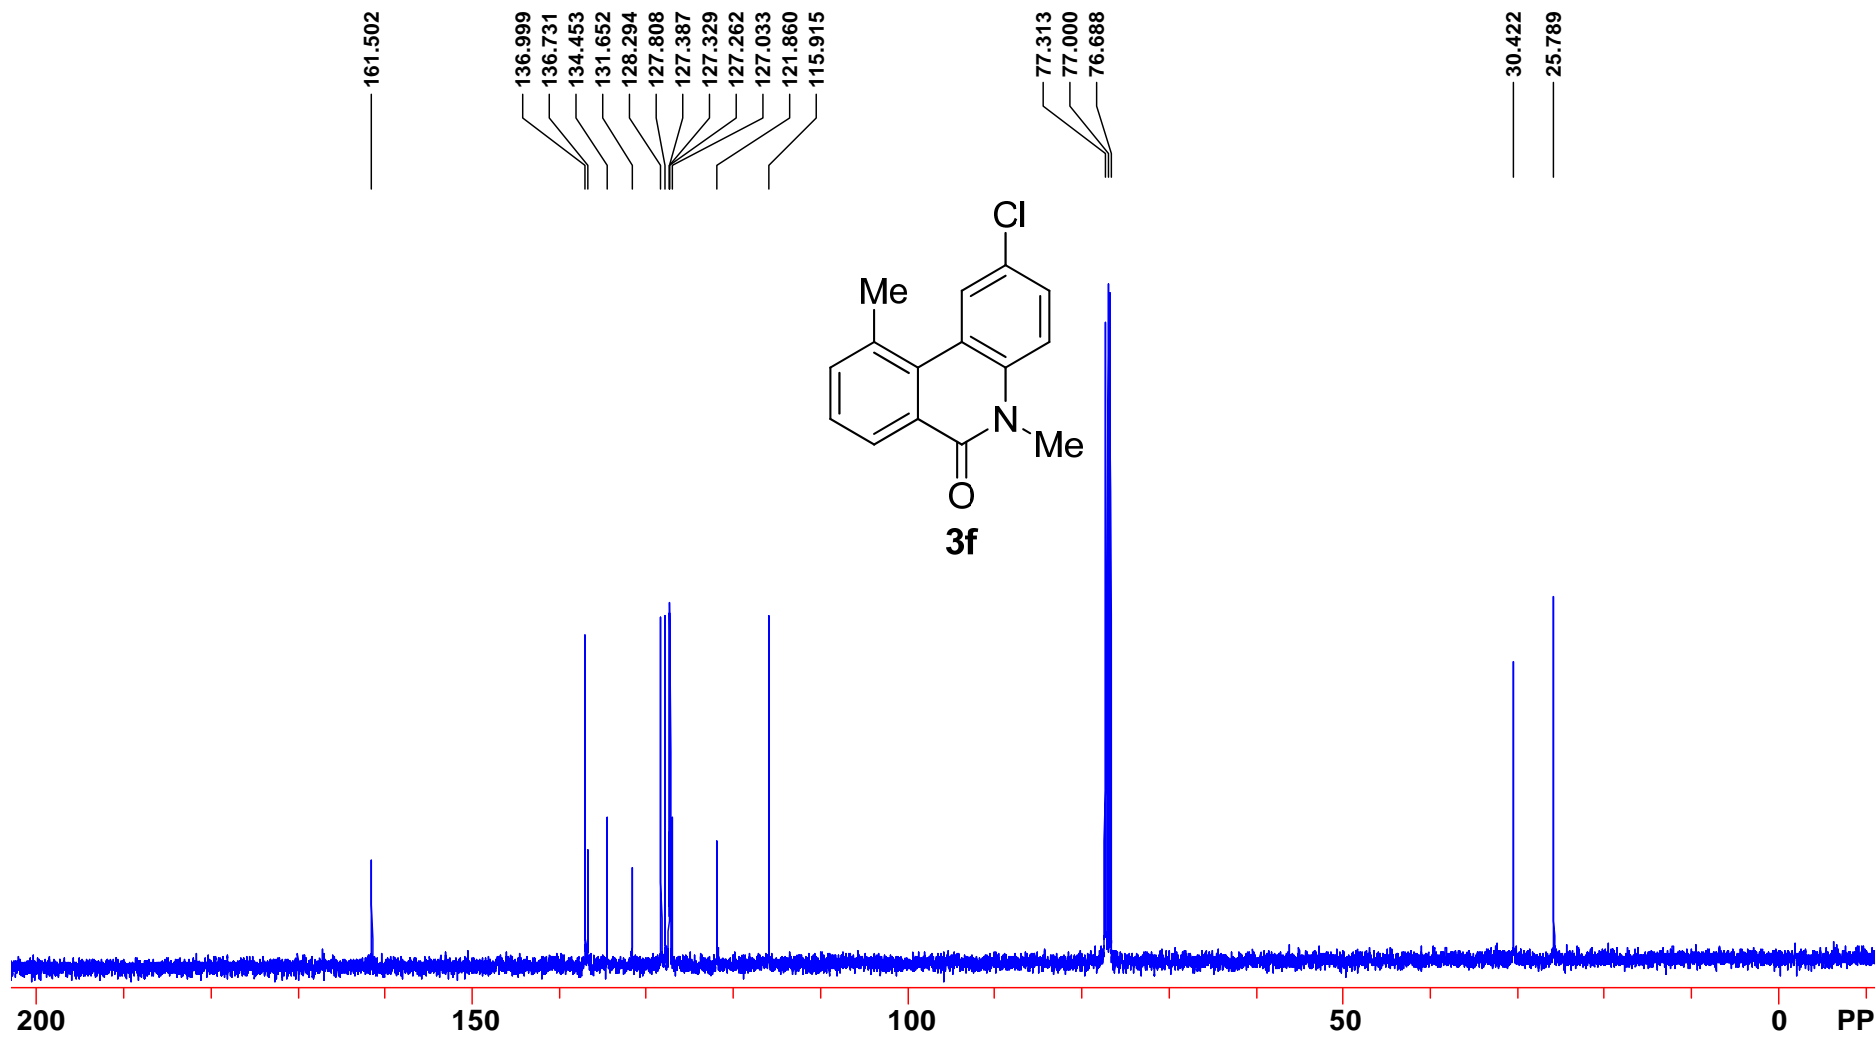

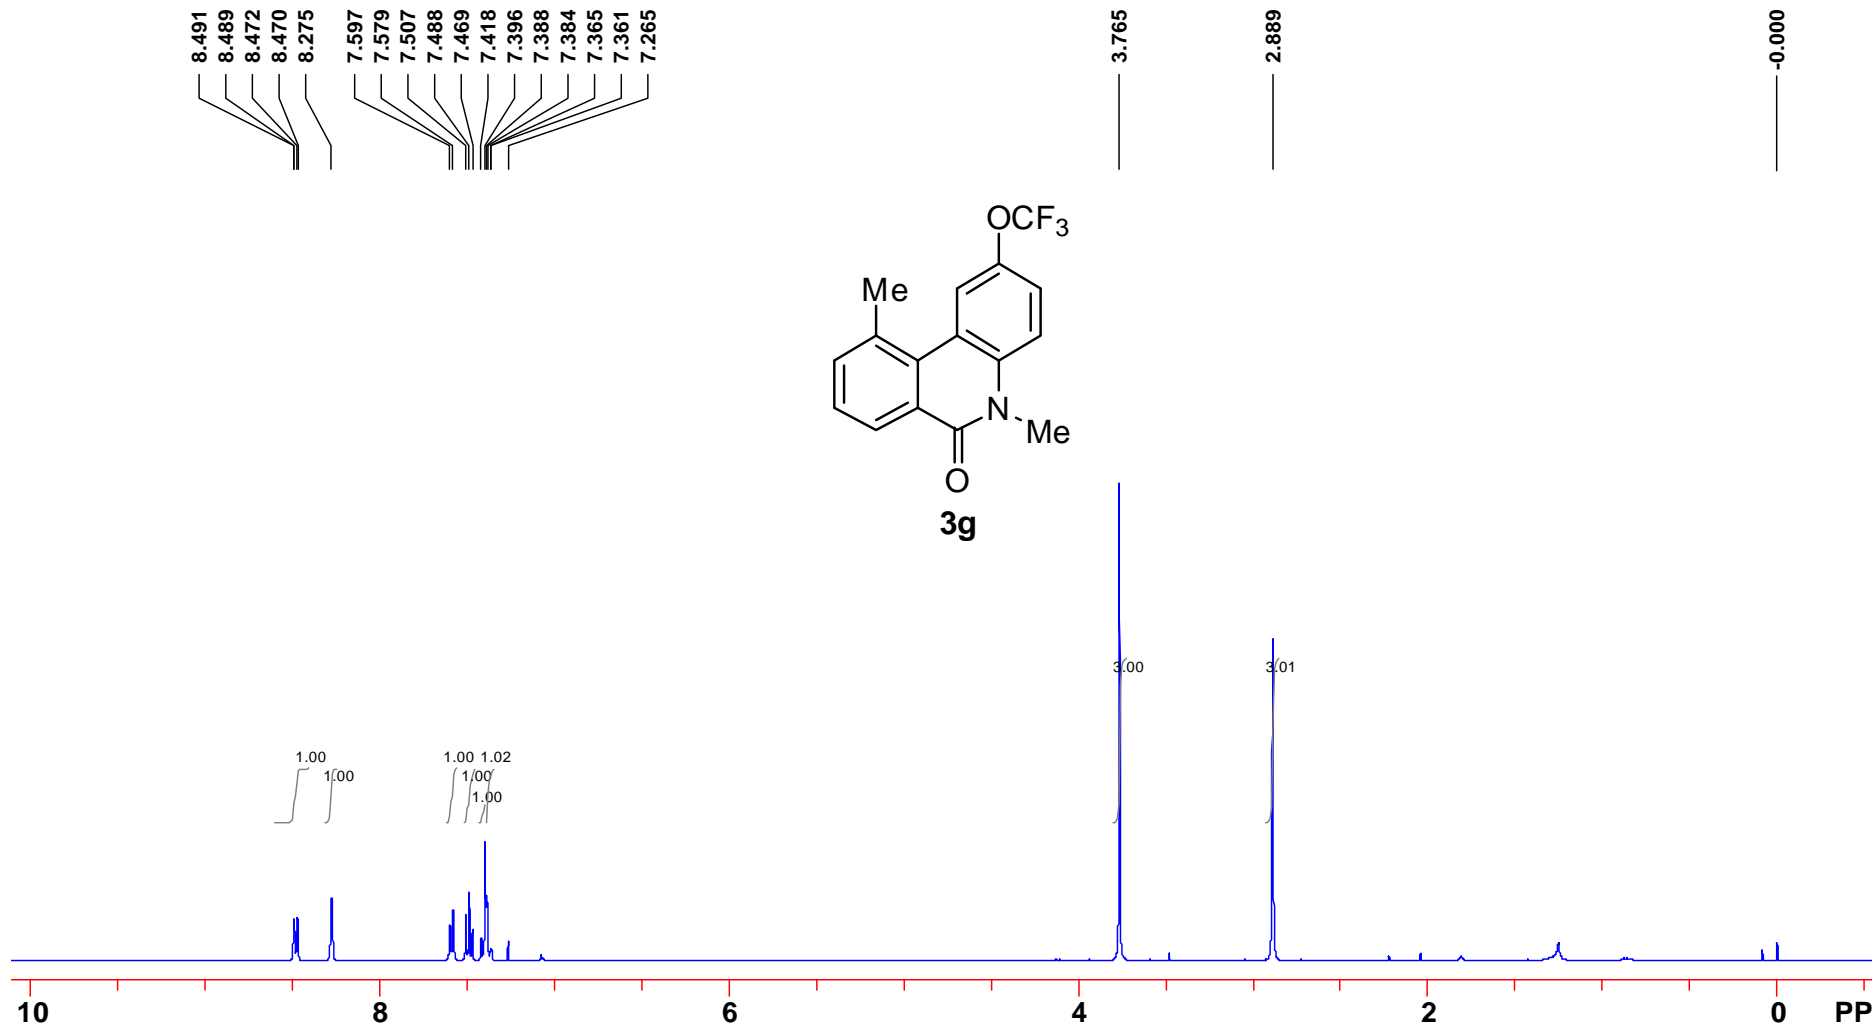

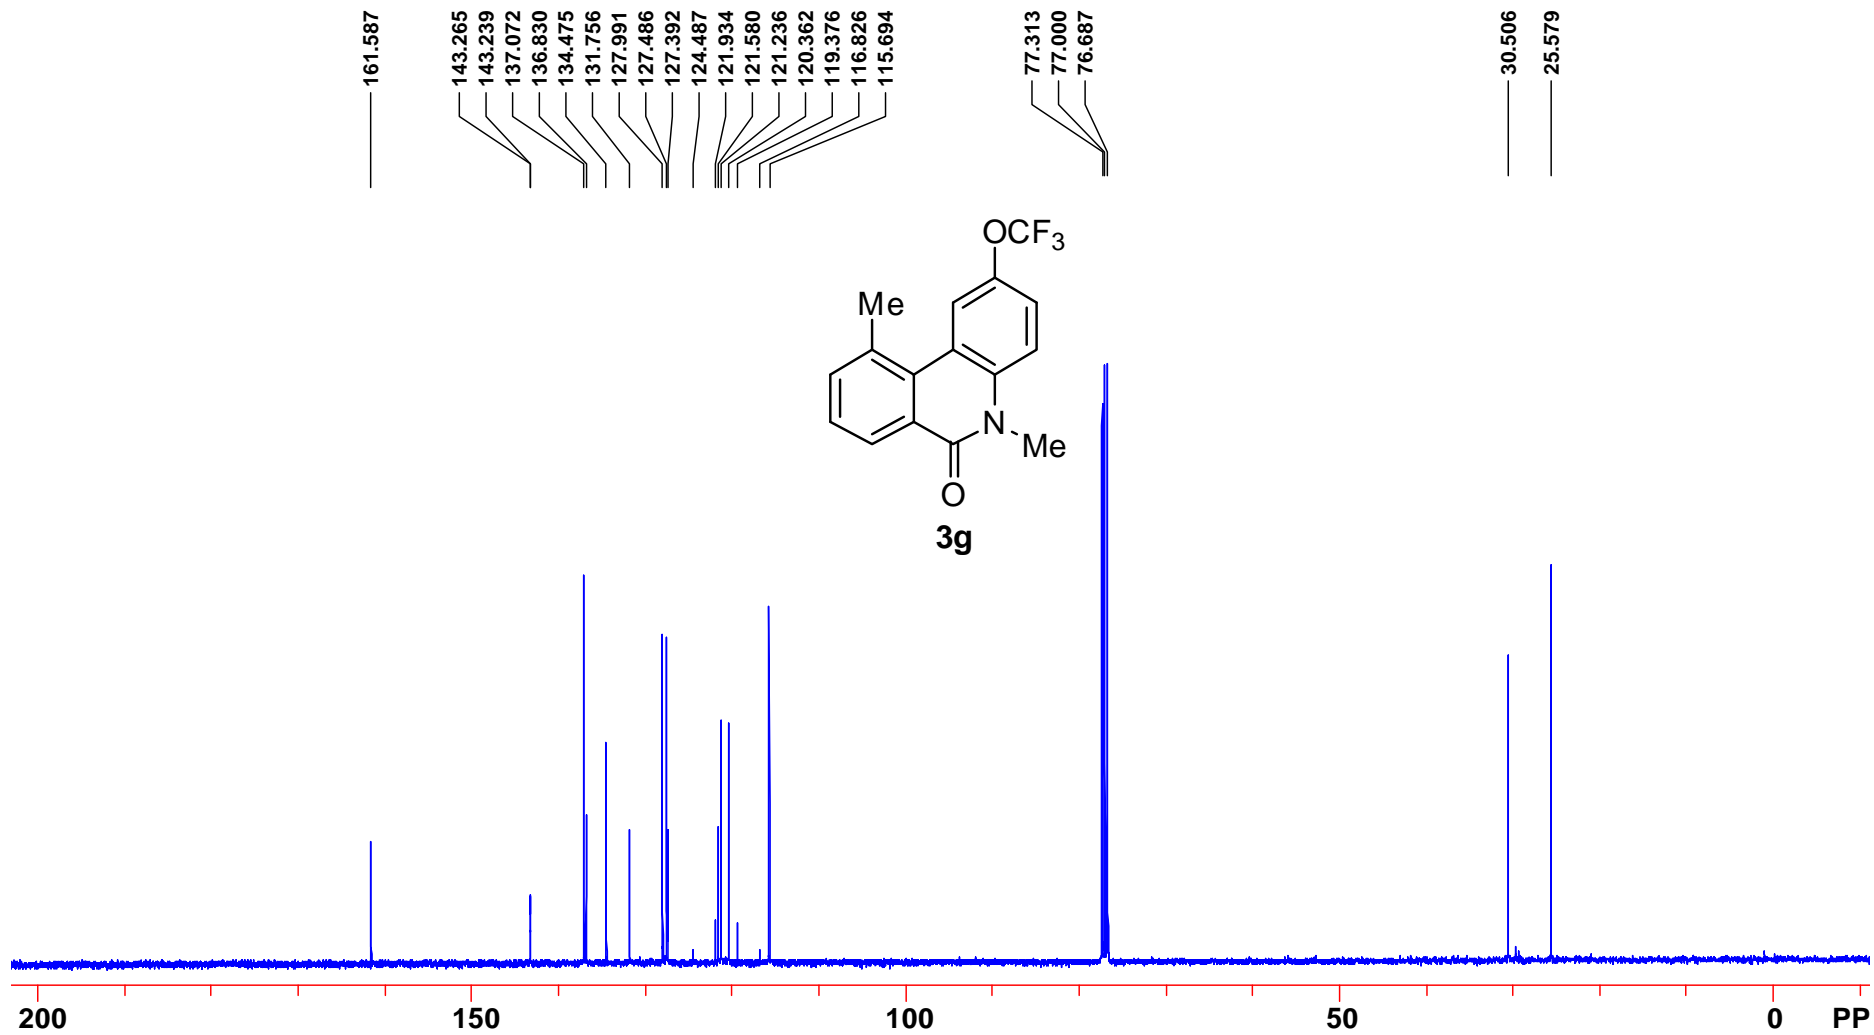

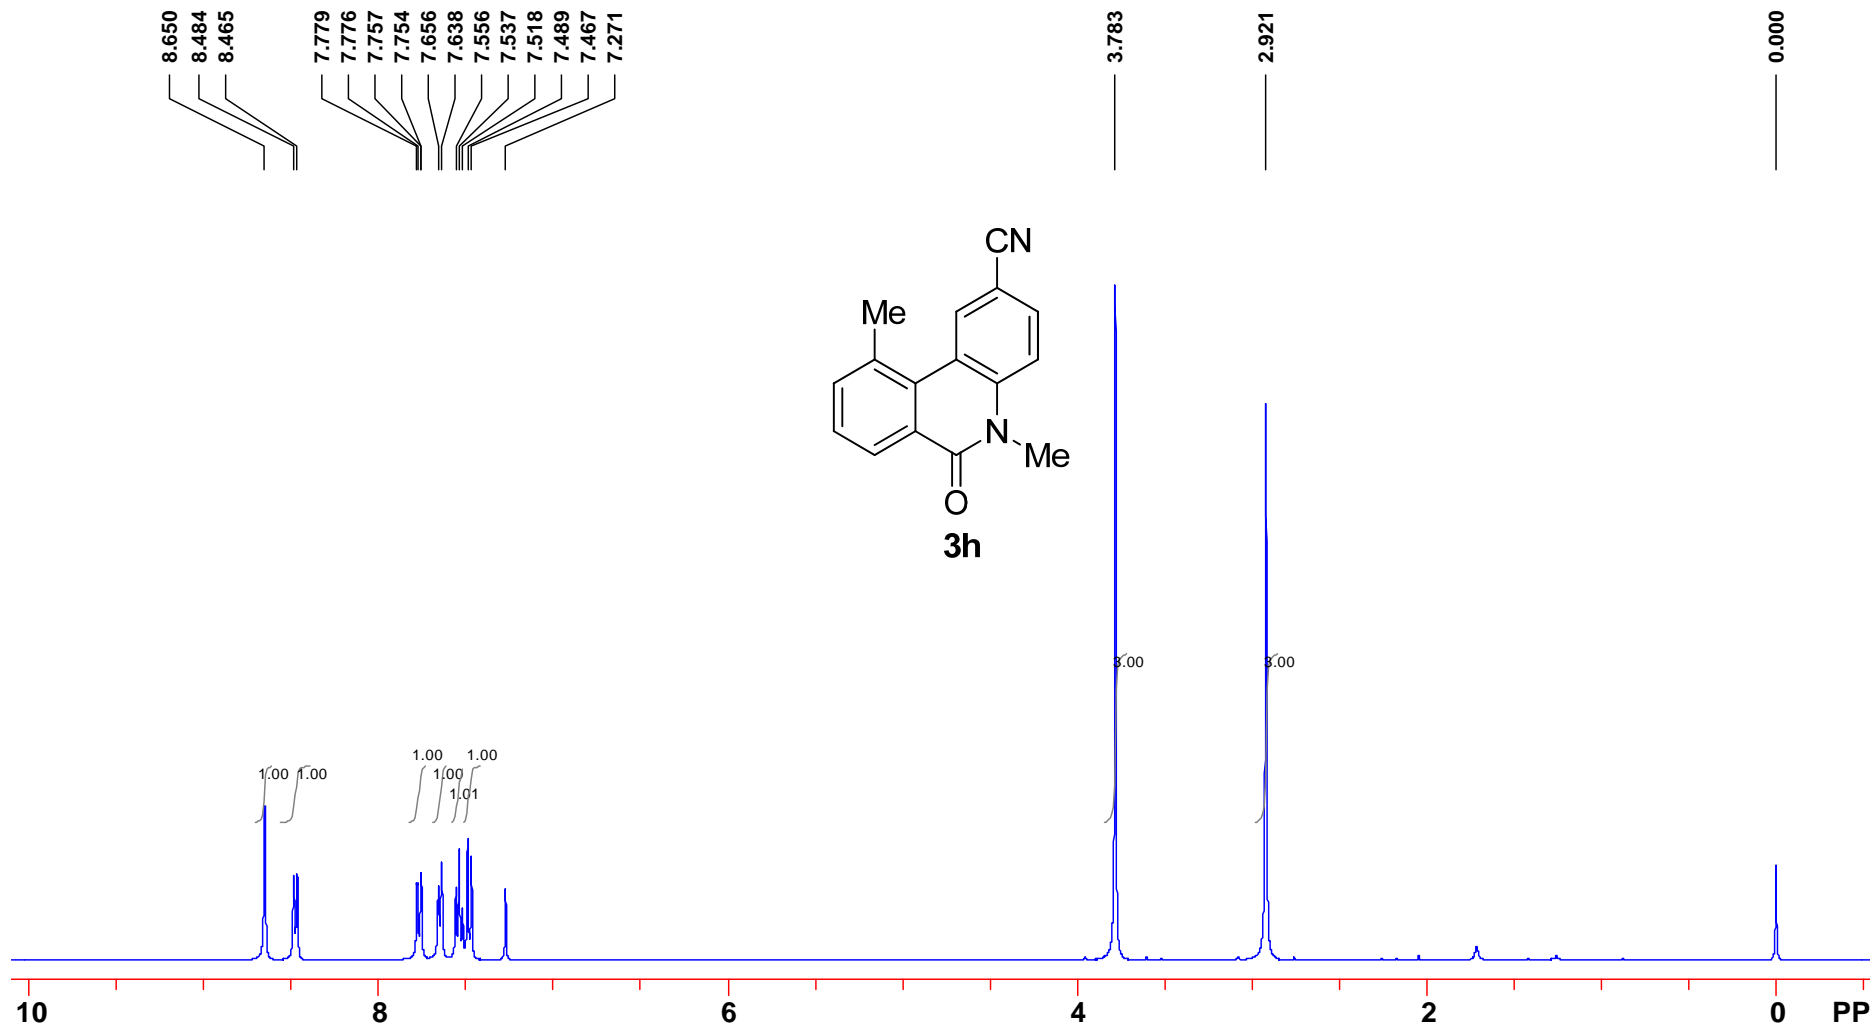



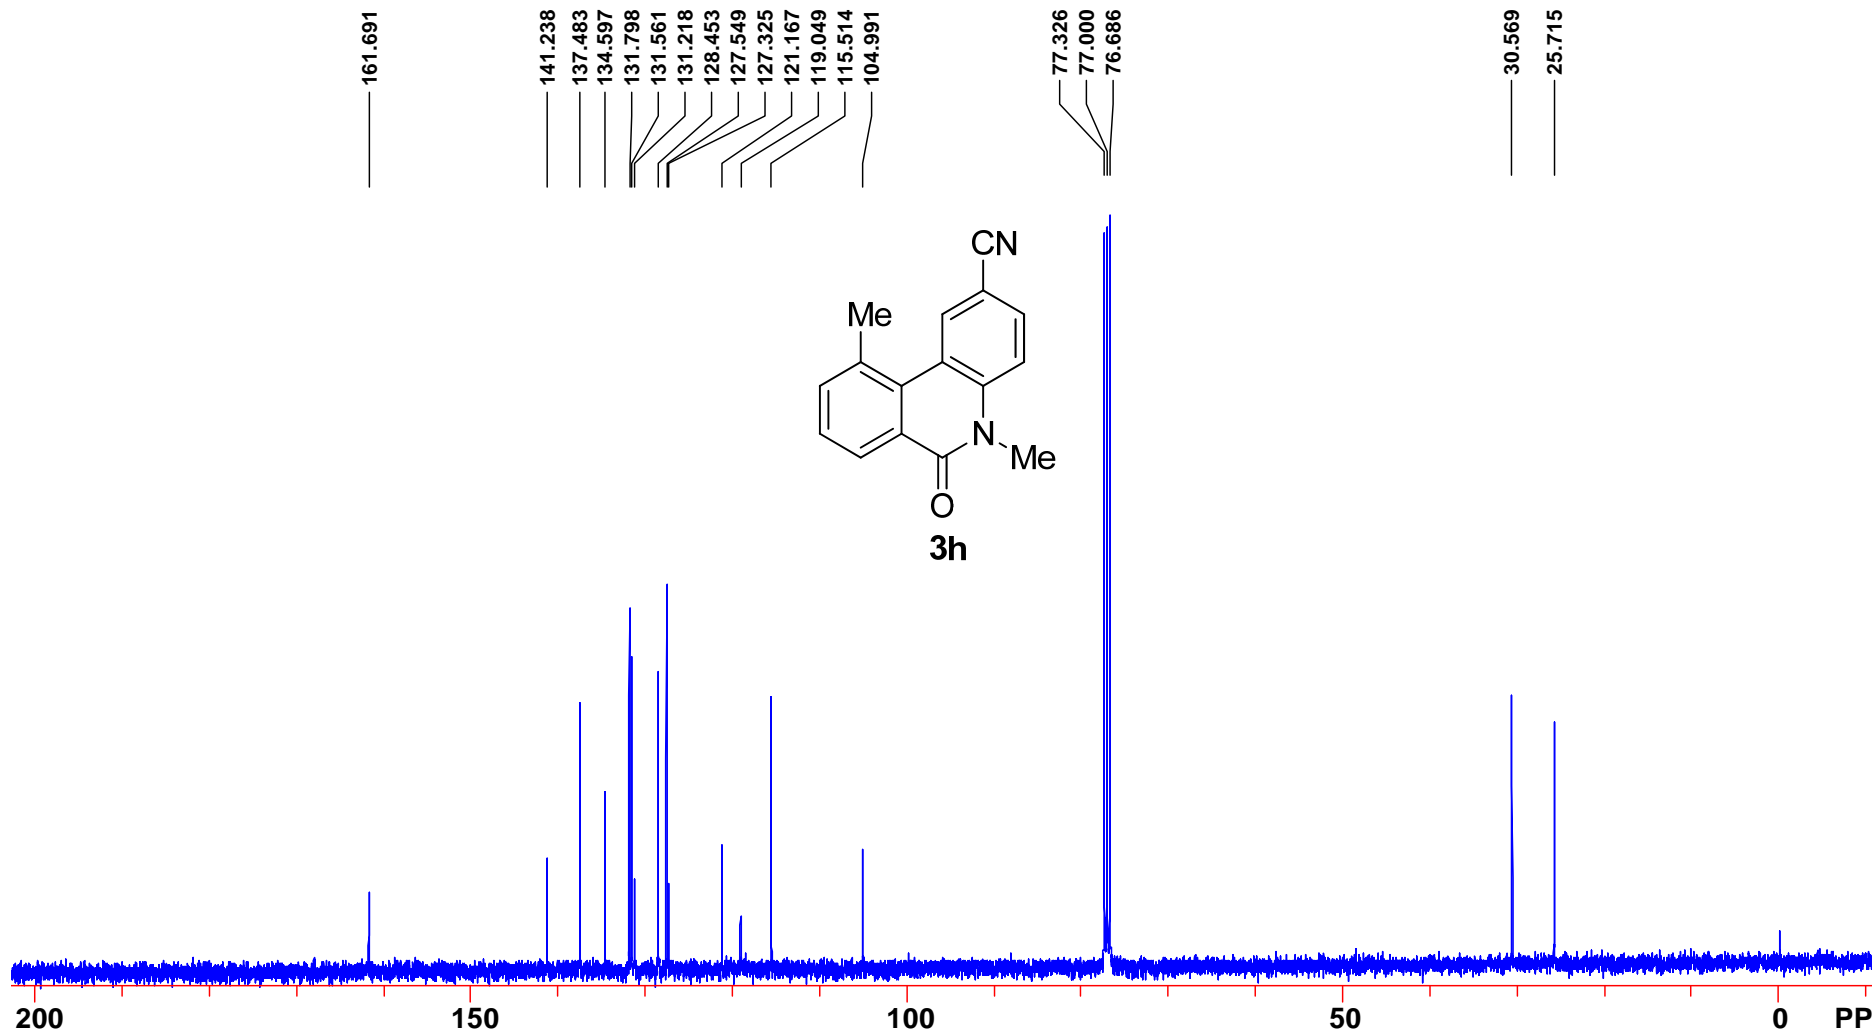

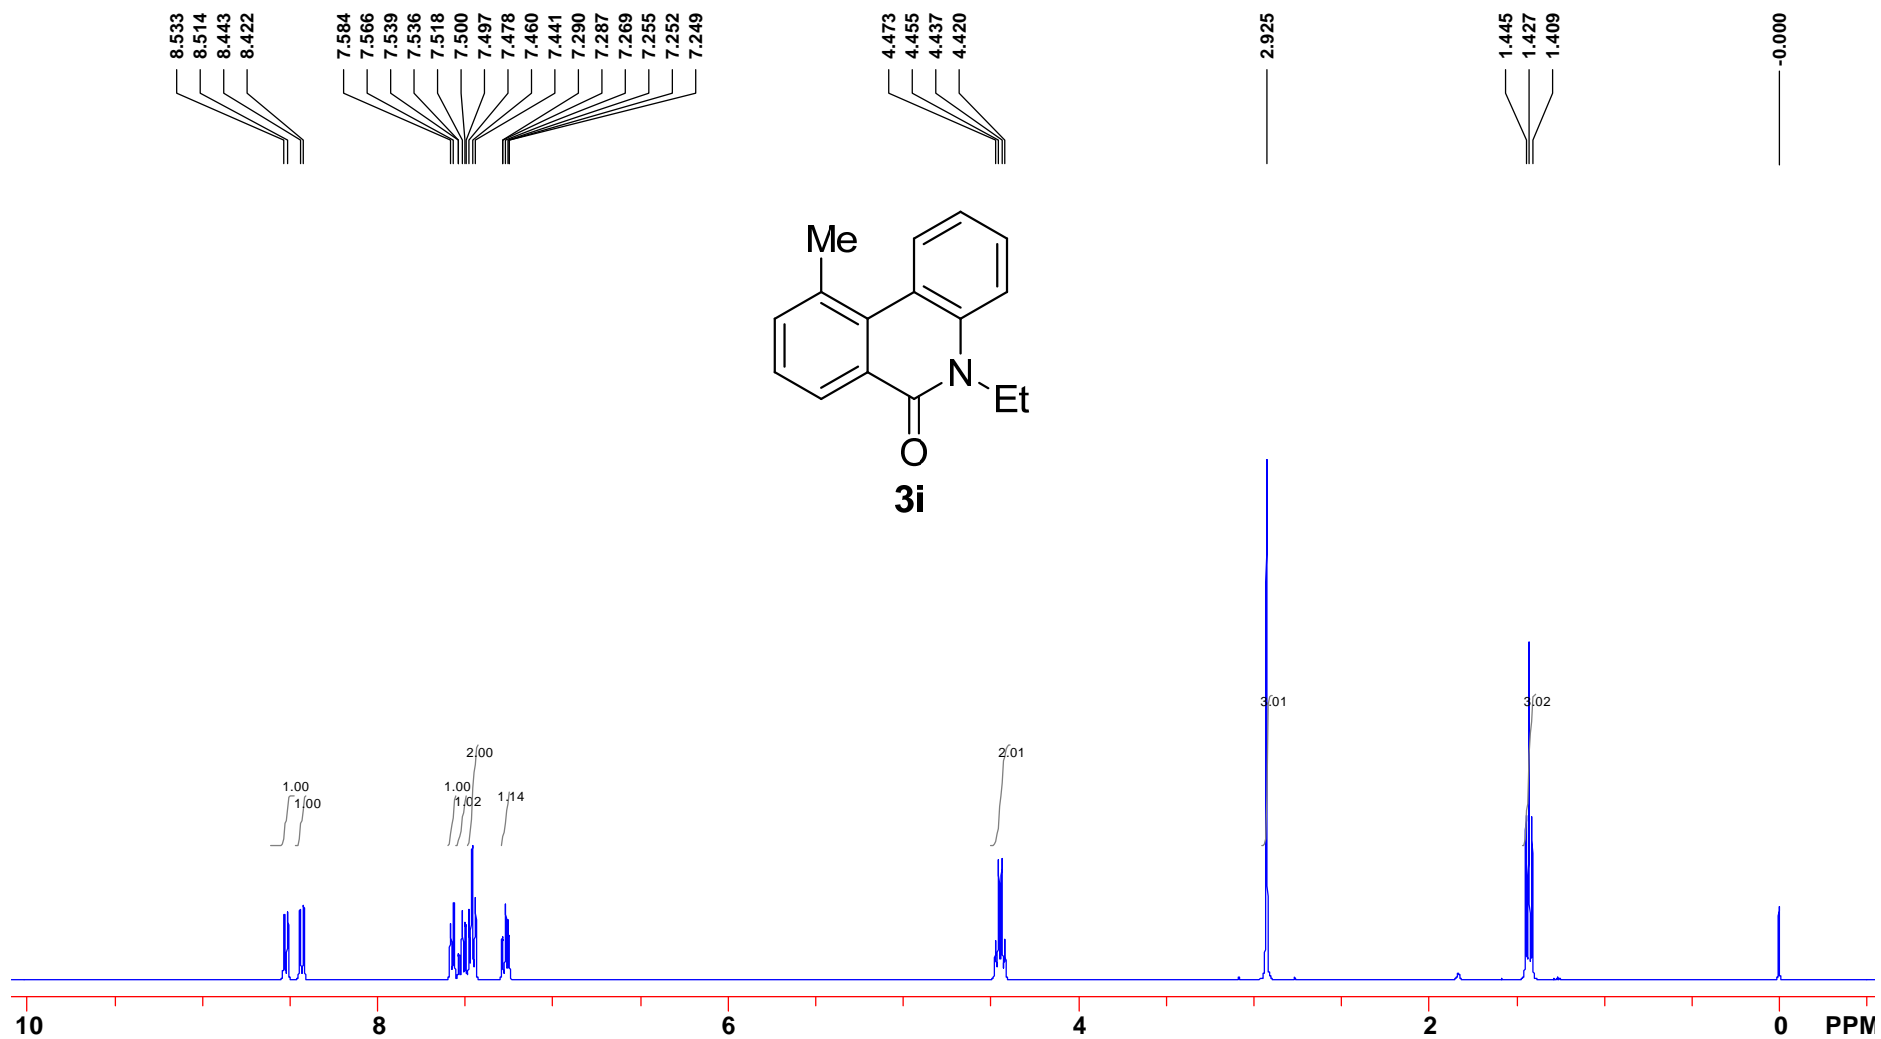

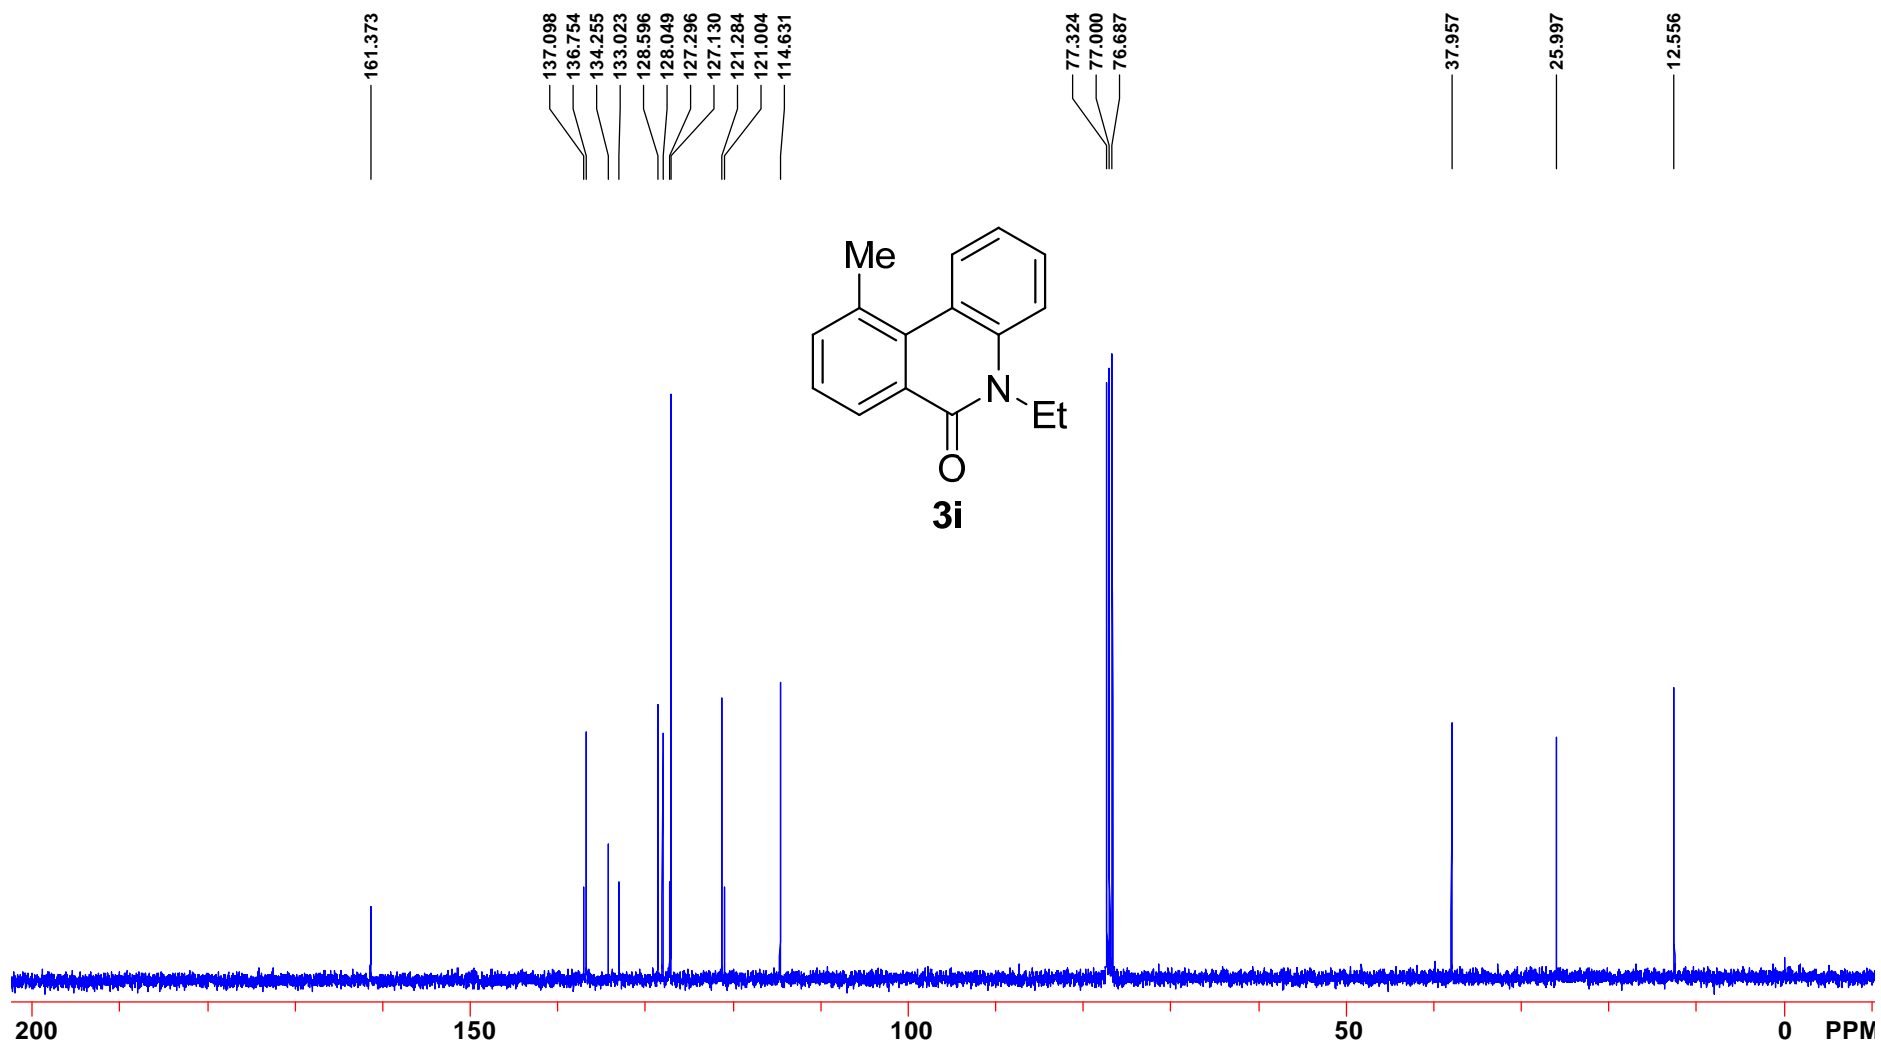

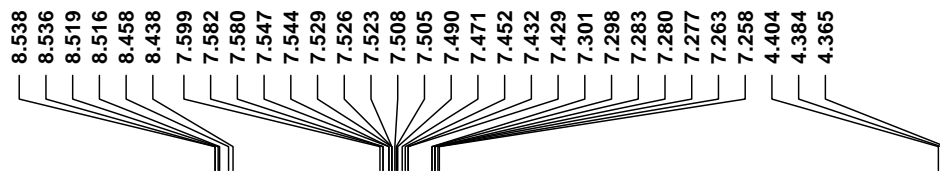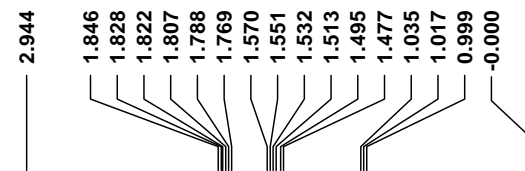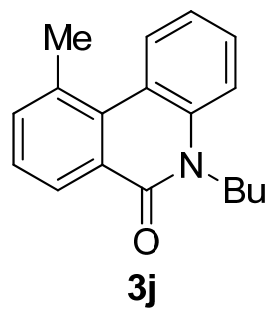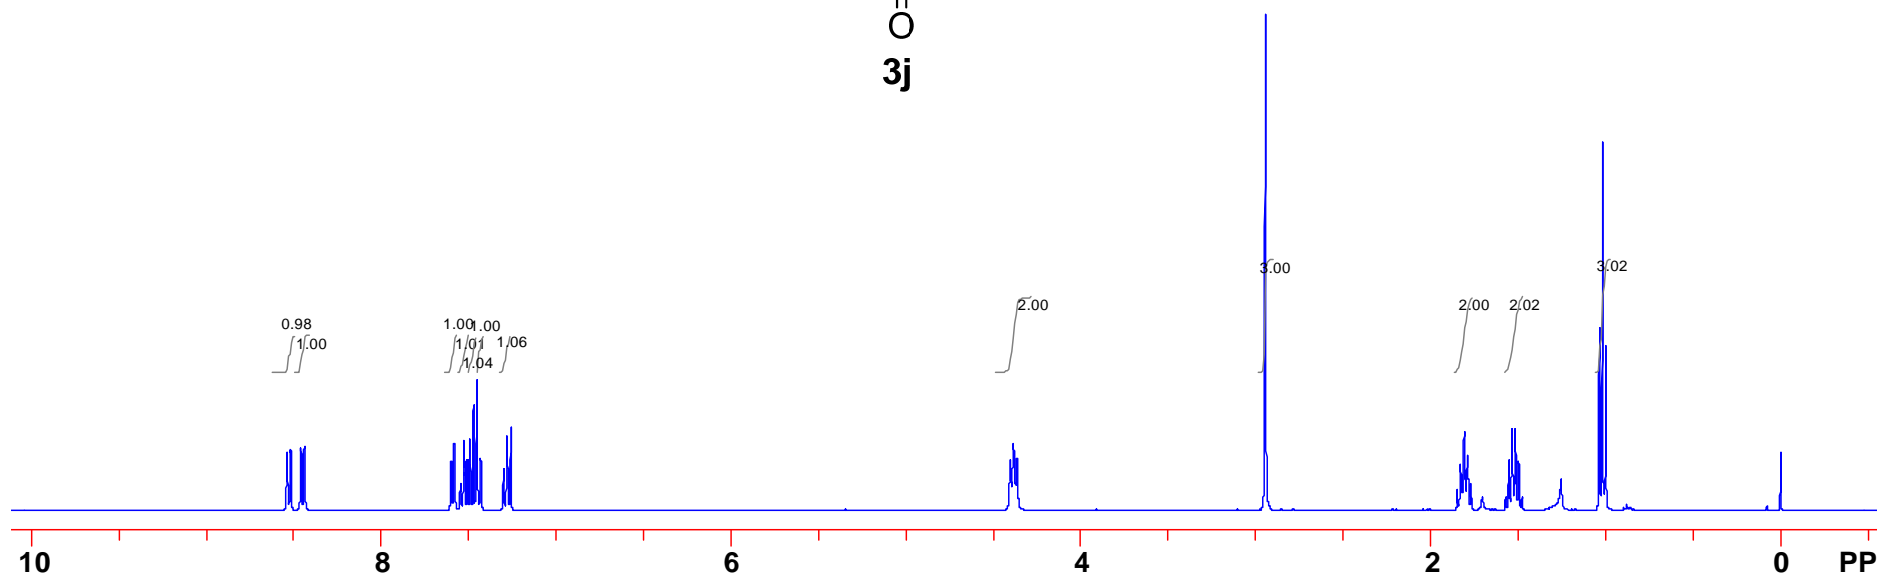

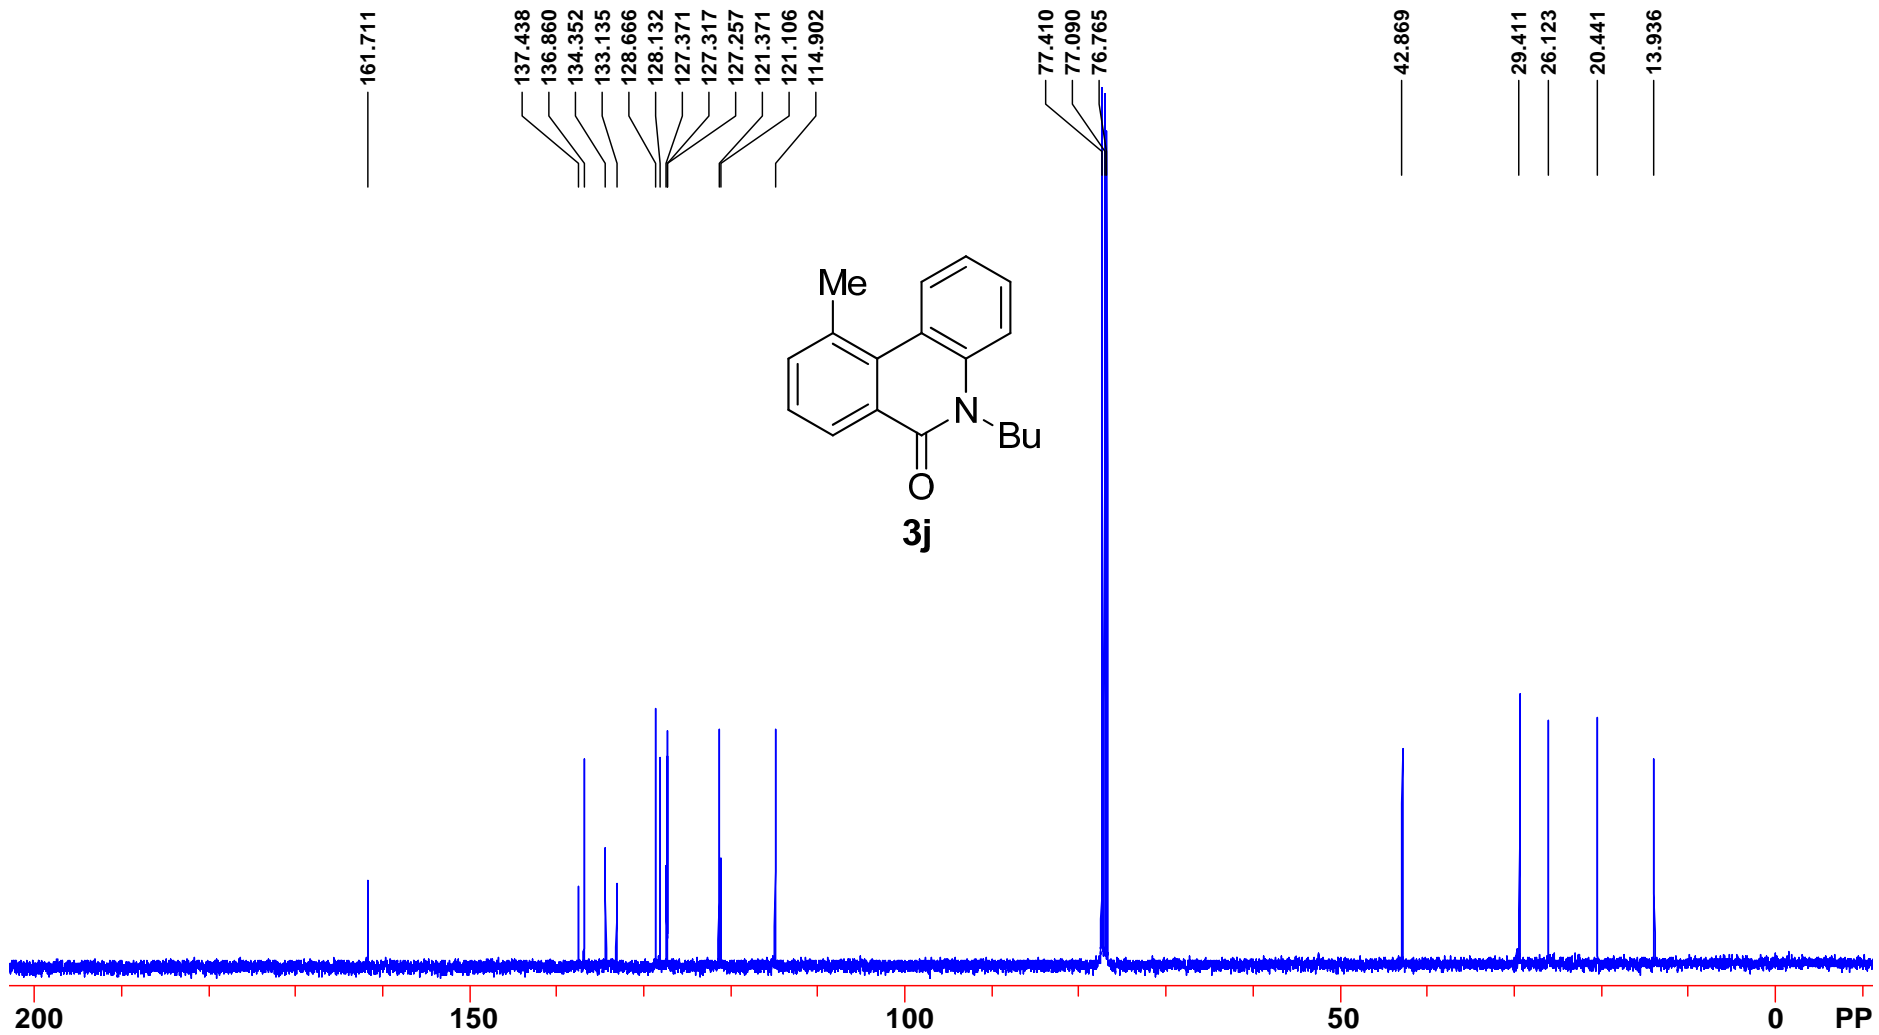

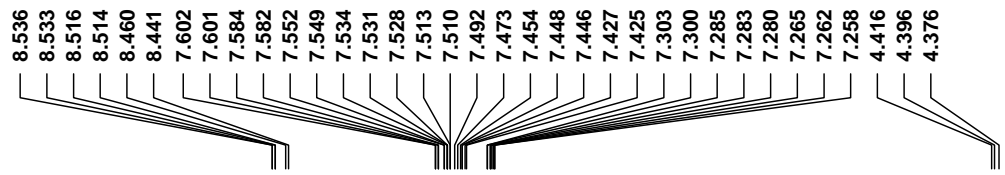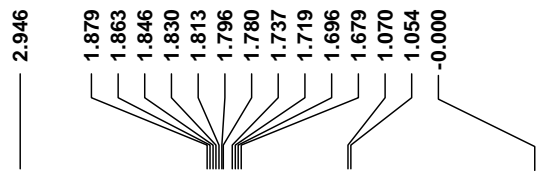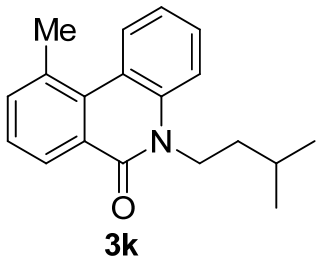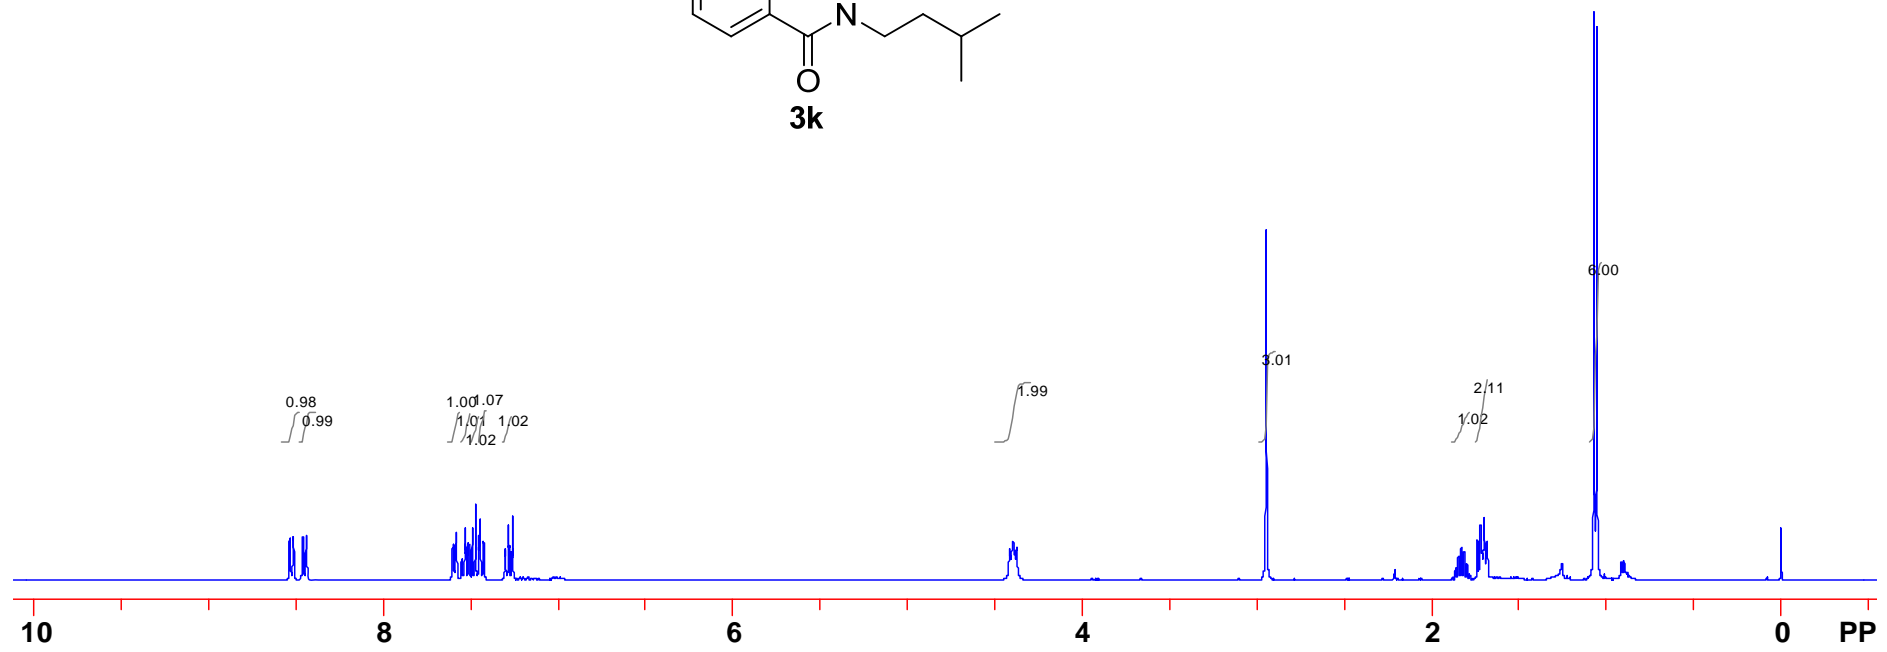

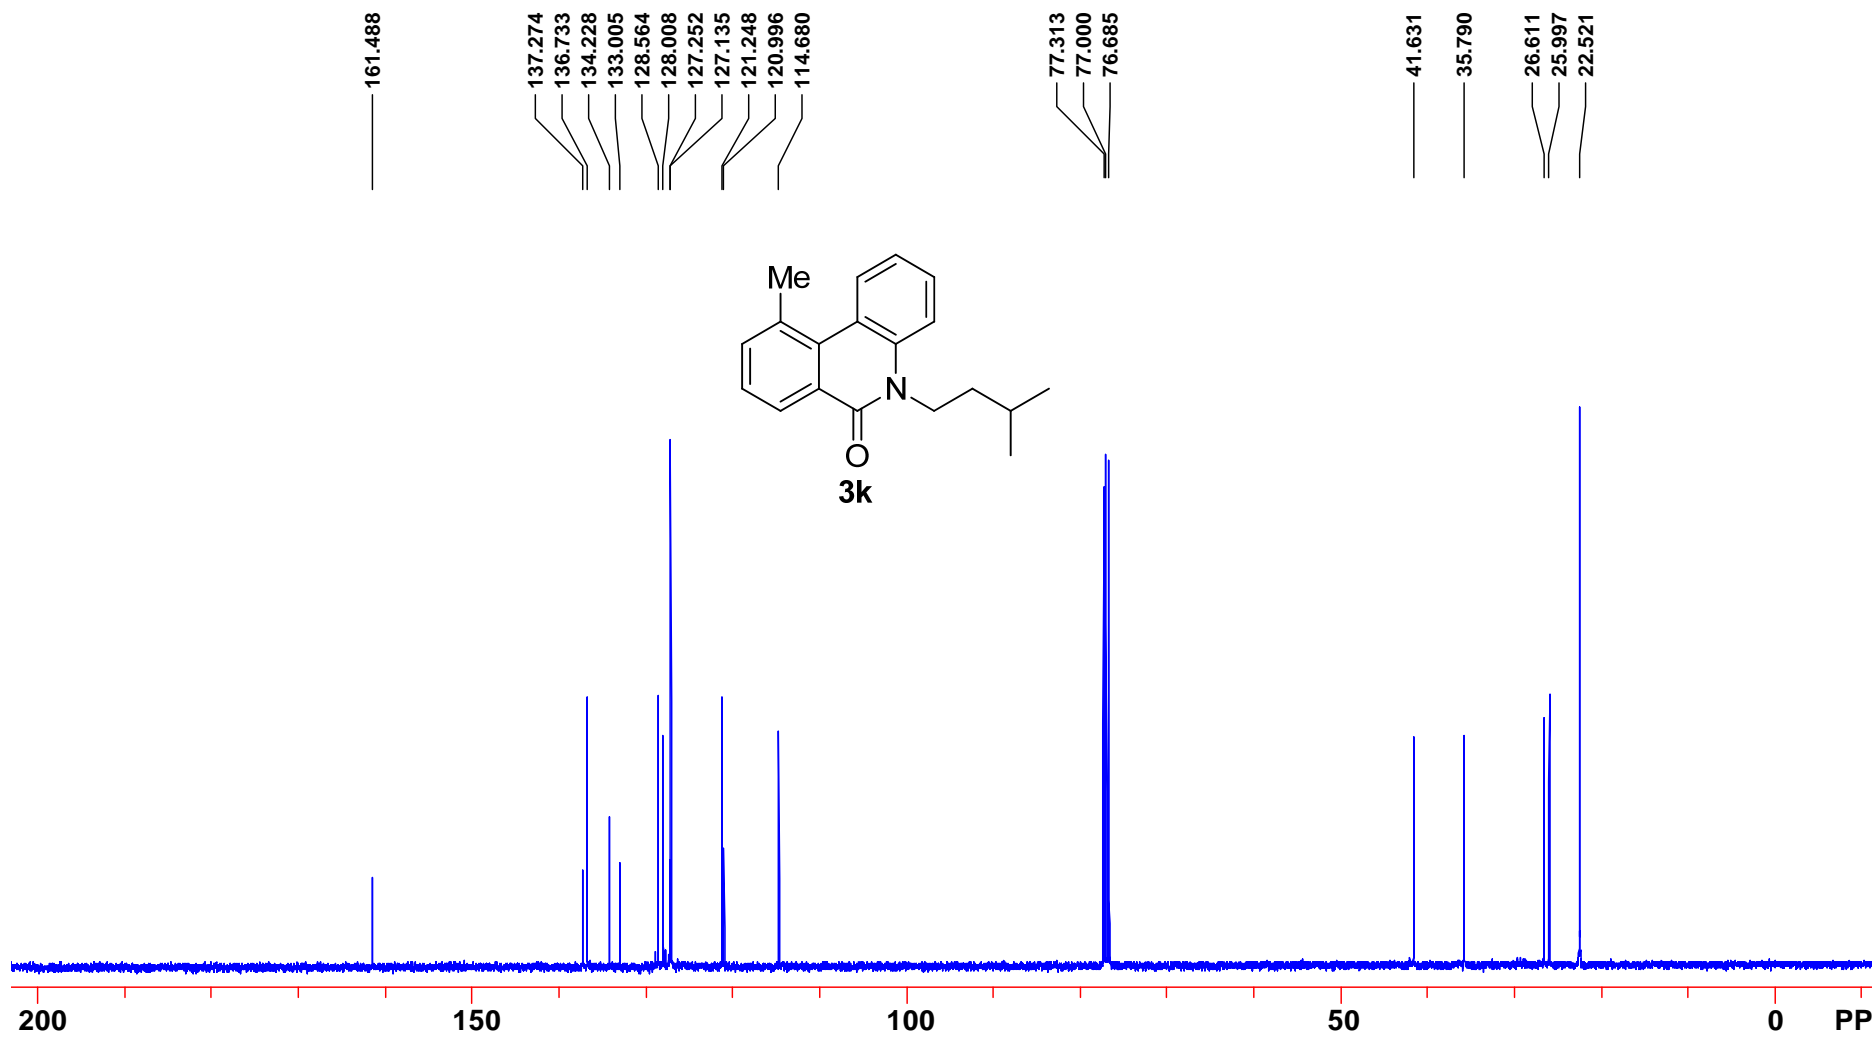

8.543  
8.523  
8.471  
8.452  
8.450  
7.640  
7.620  
7.601  
7.582  
7.533  
7.515  
7.506  
7.496  
7.487  
7.468  
7.331  
7.312  
7.288  
7.270  
7.256  
7.243  
7.230  
6.745  
6.741  
6.723

2.981

0.000

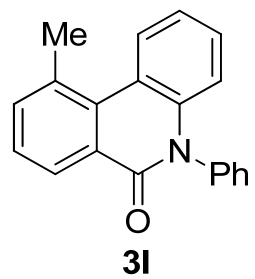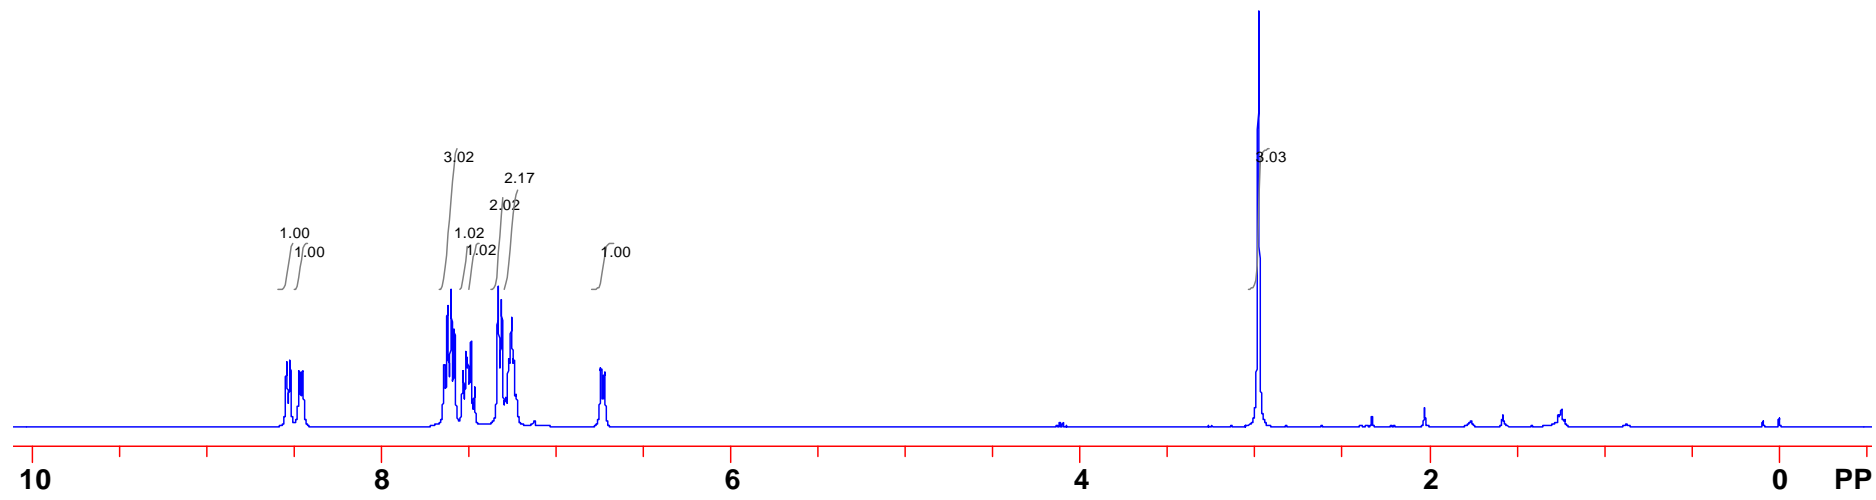



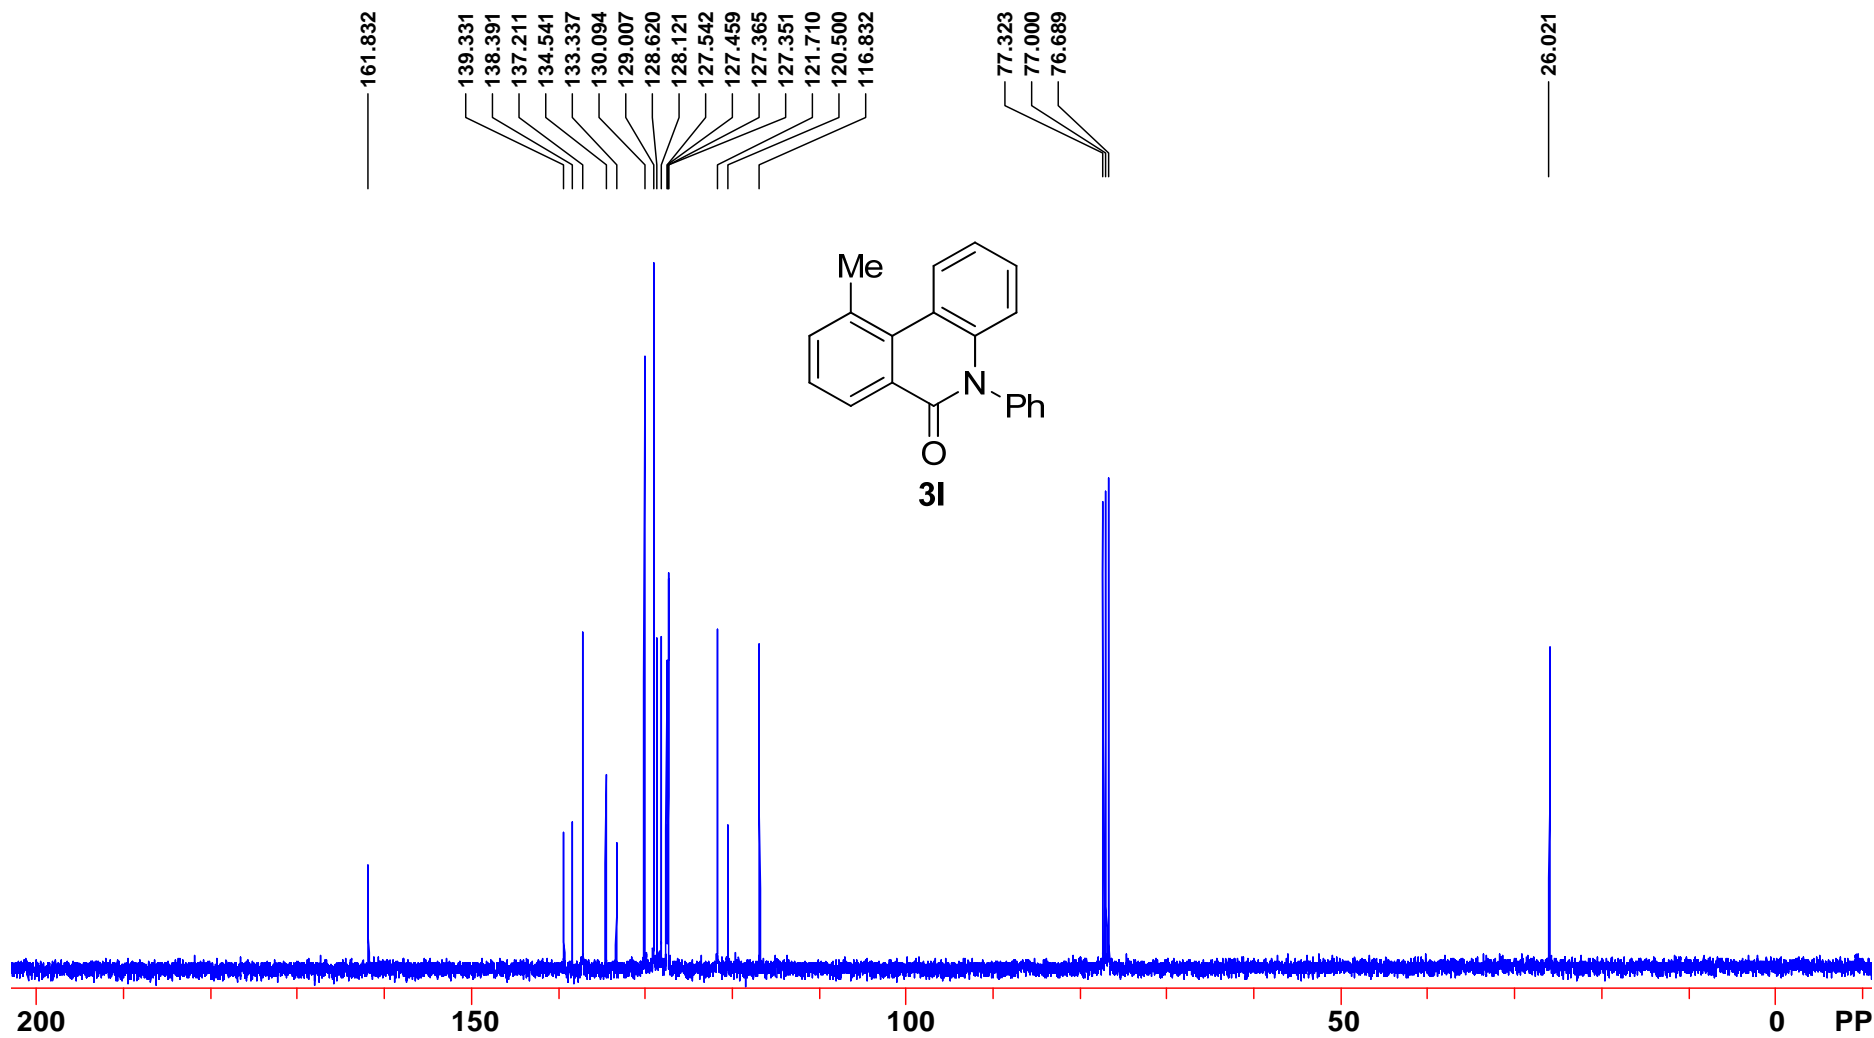

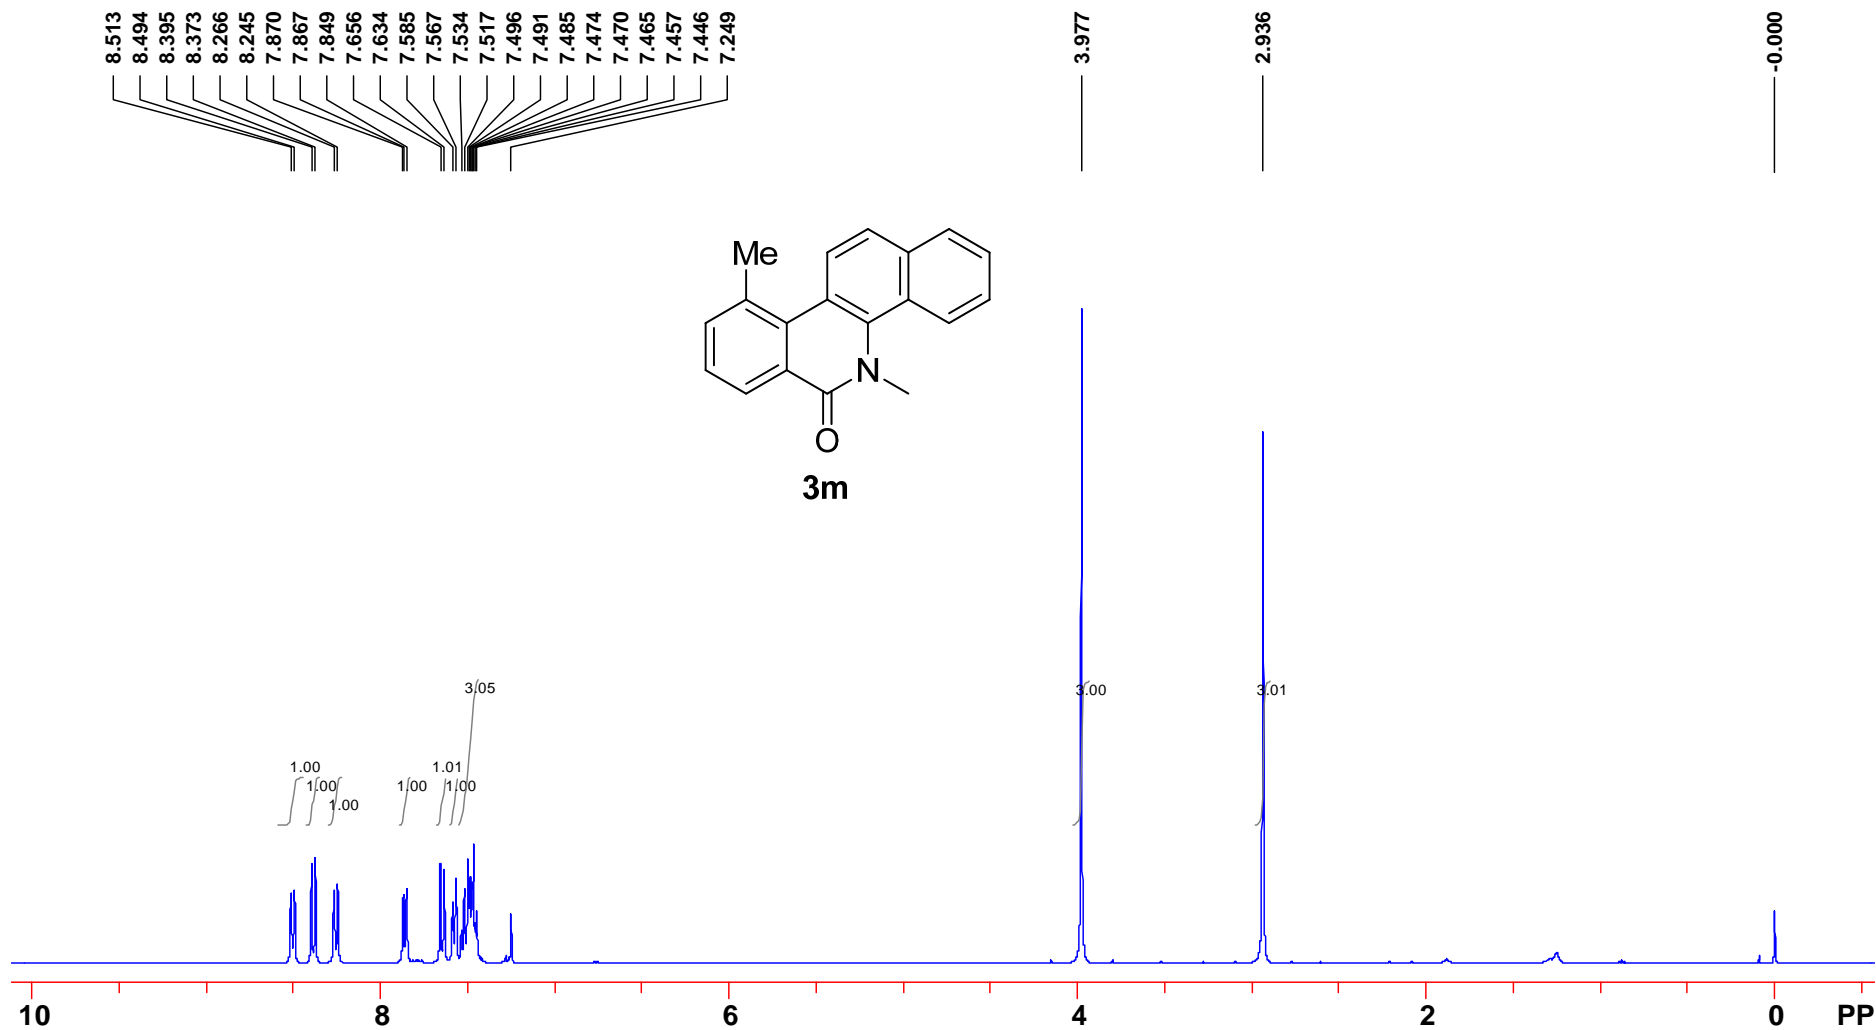

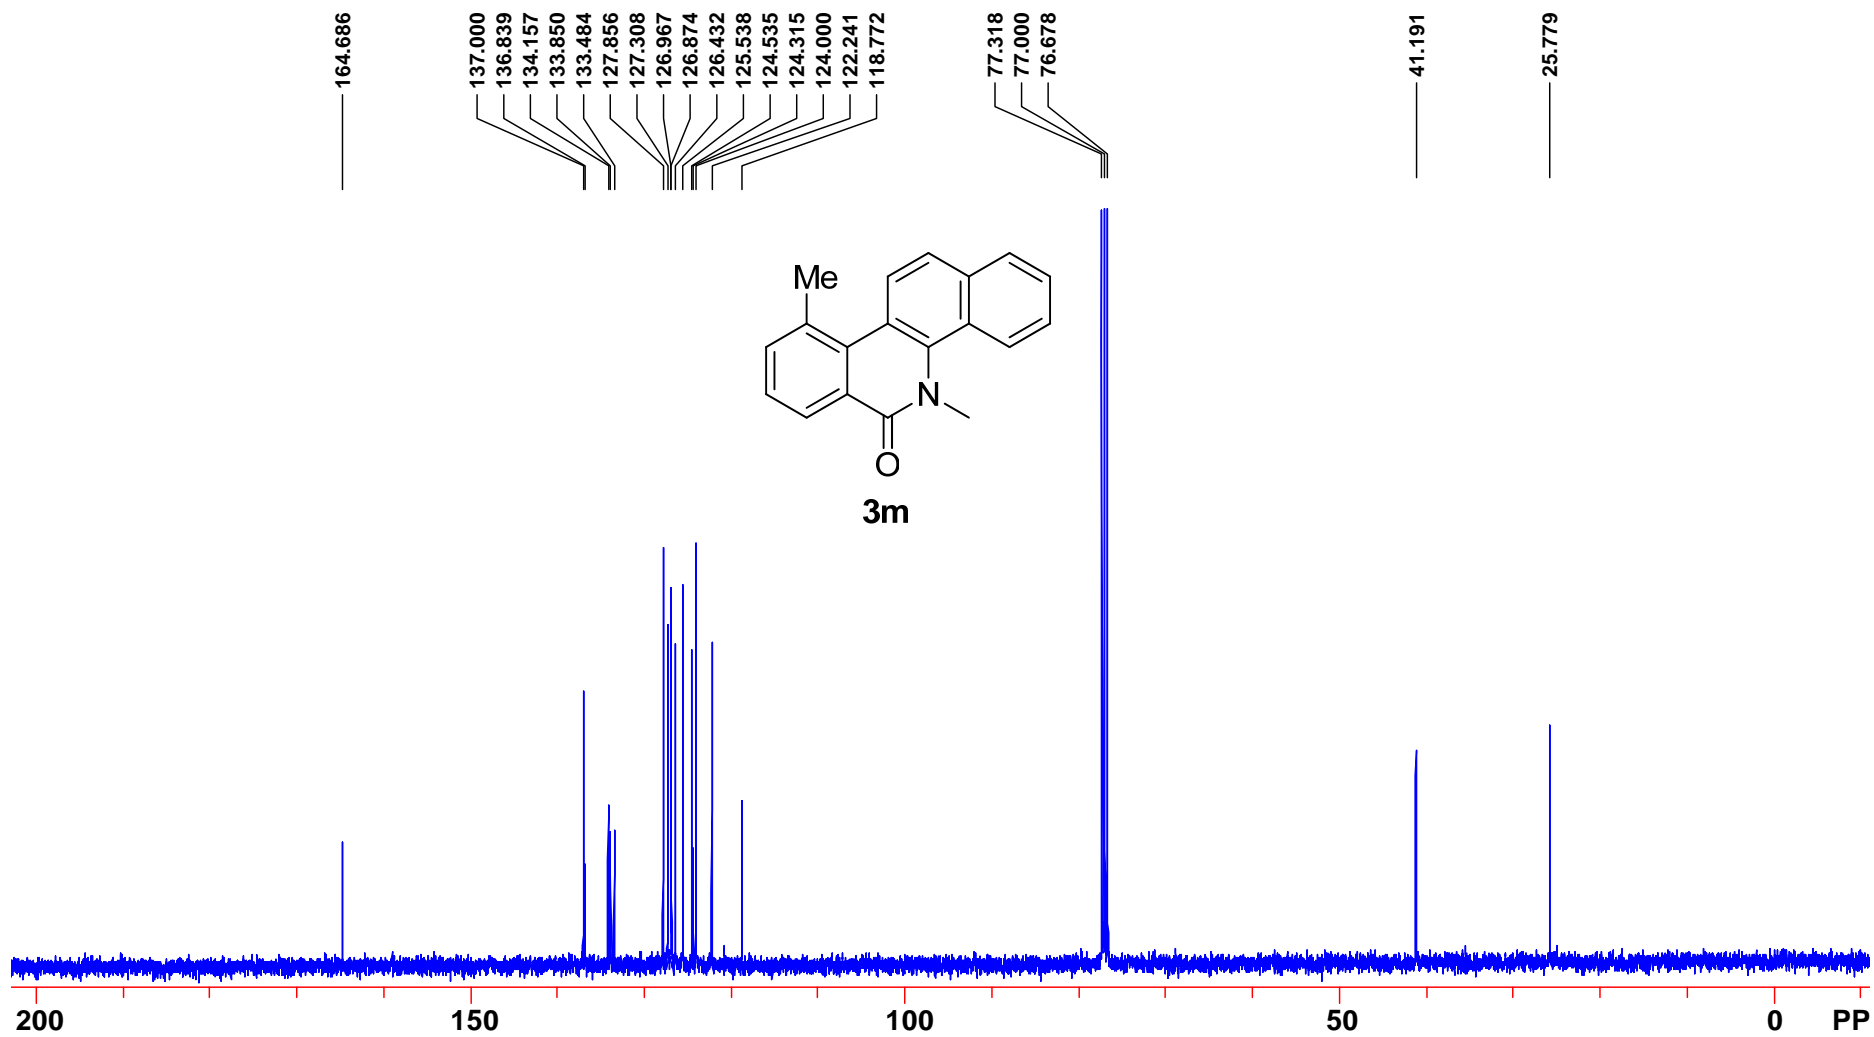

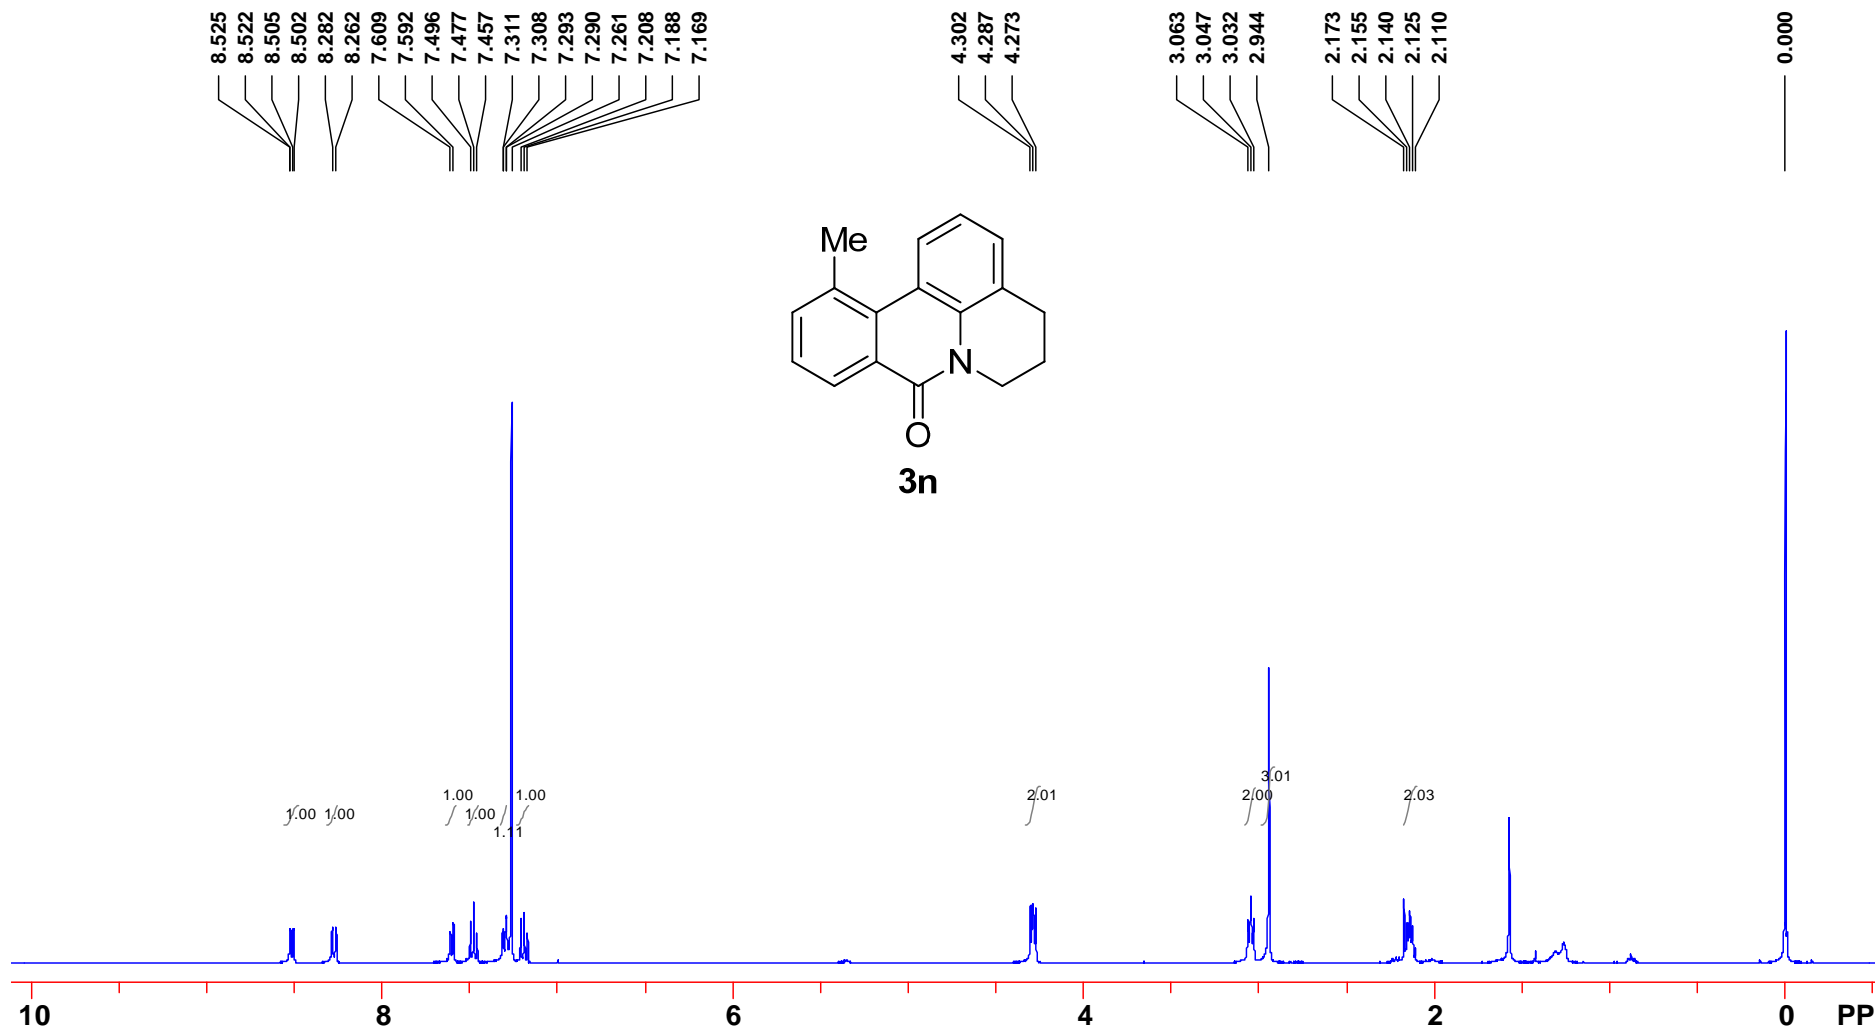

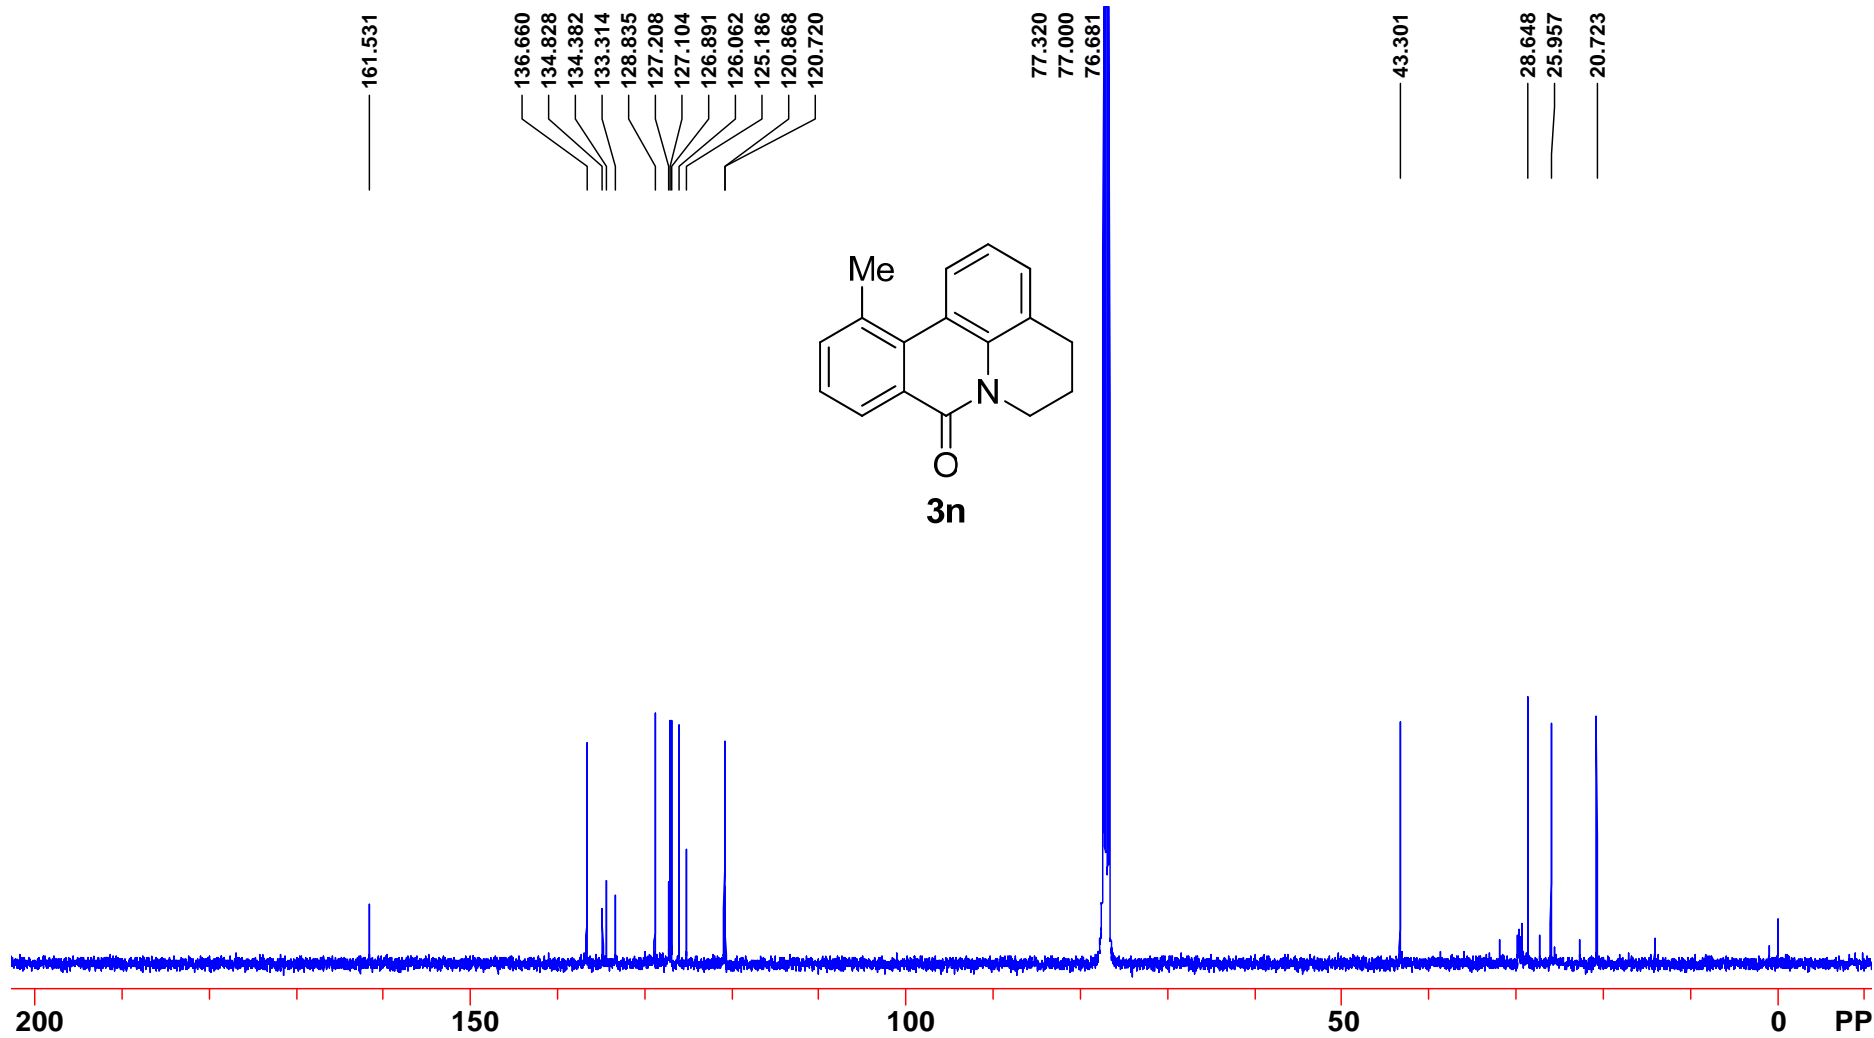

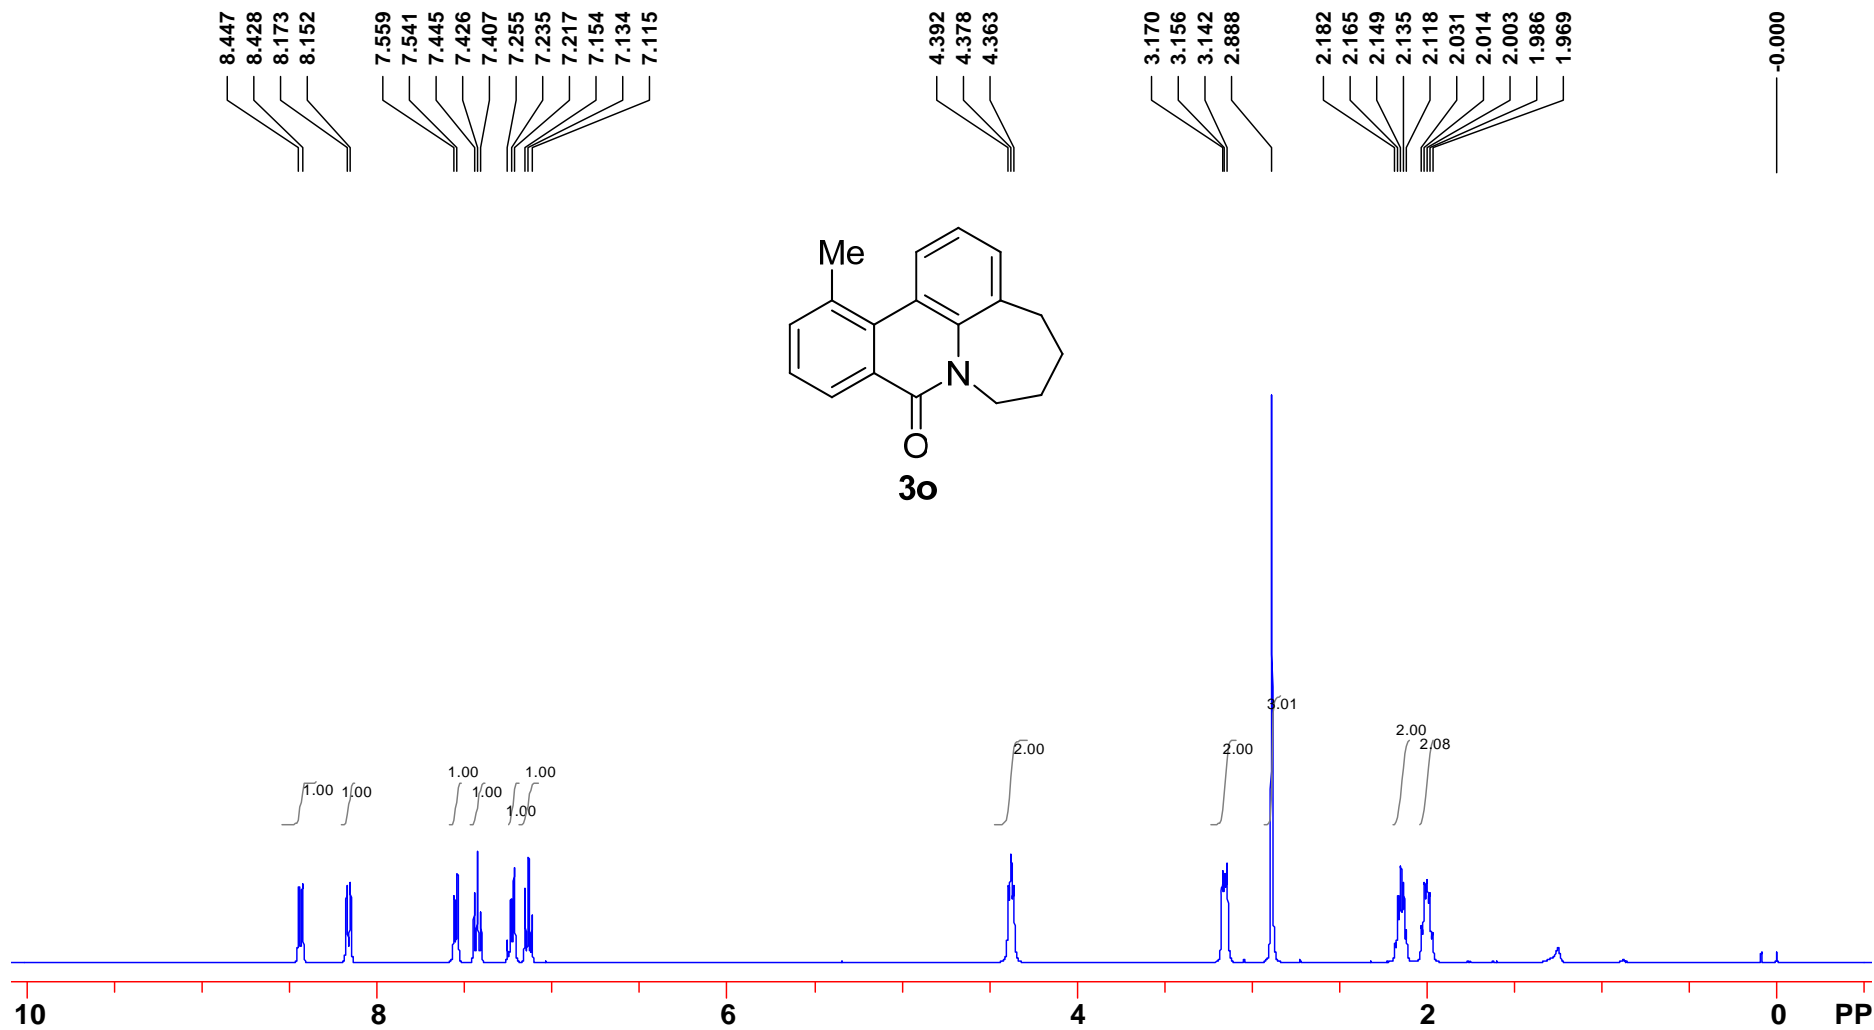

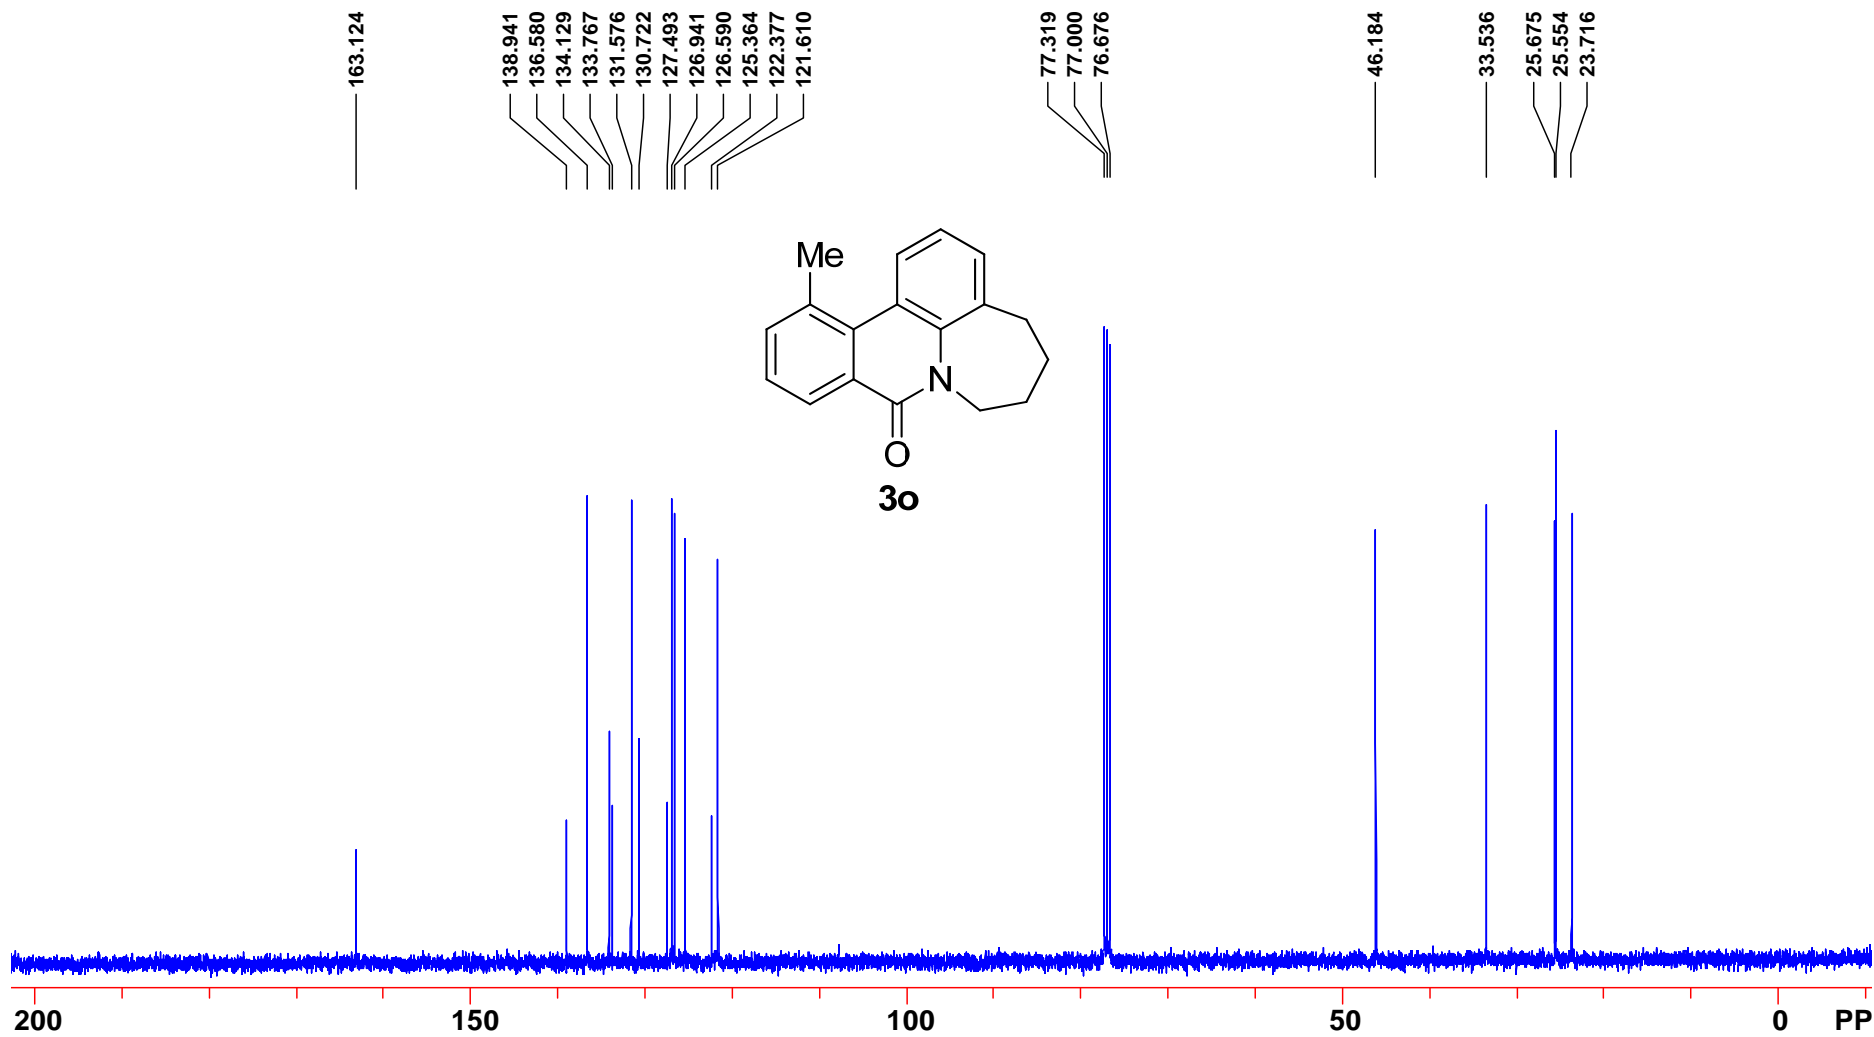

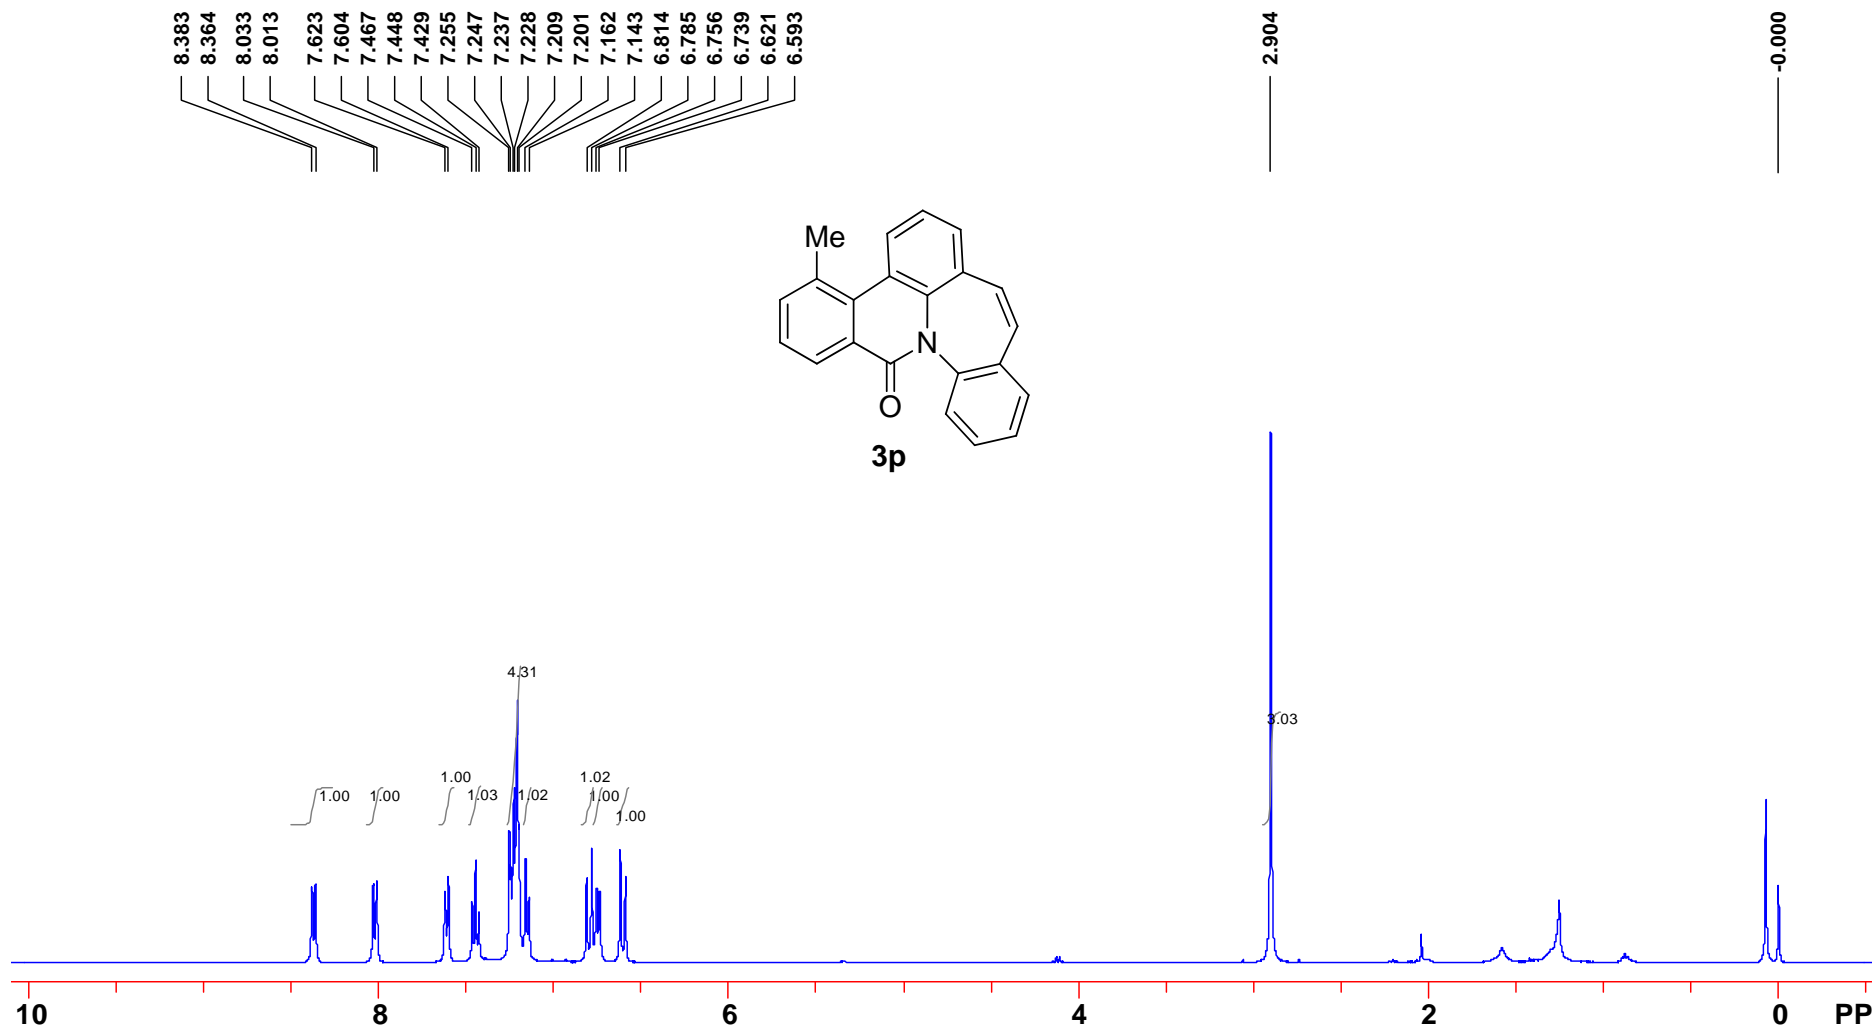



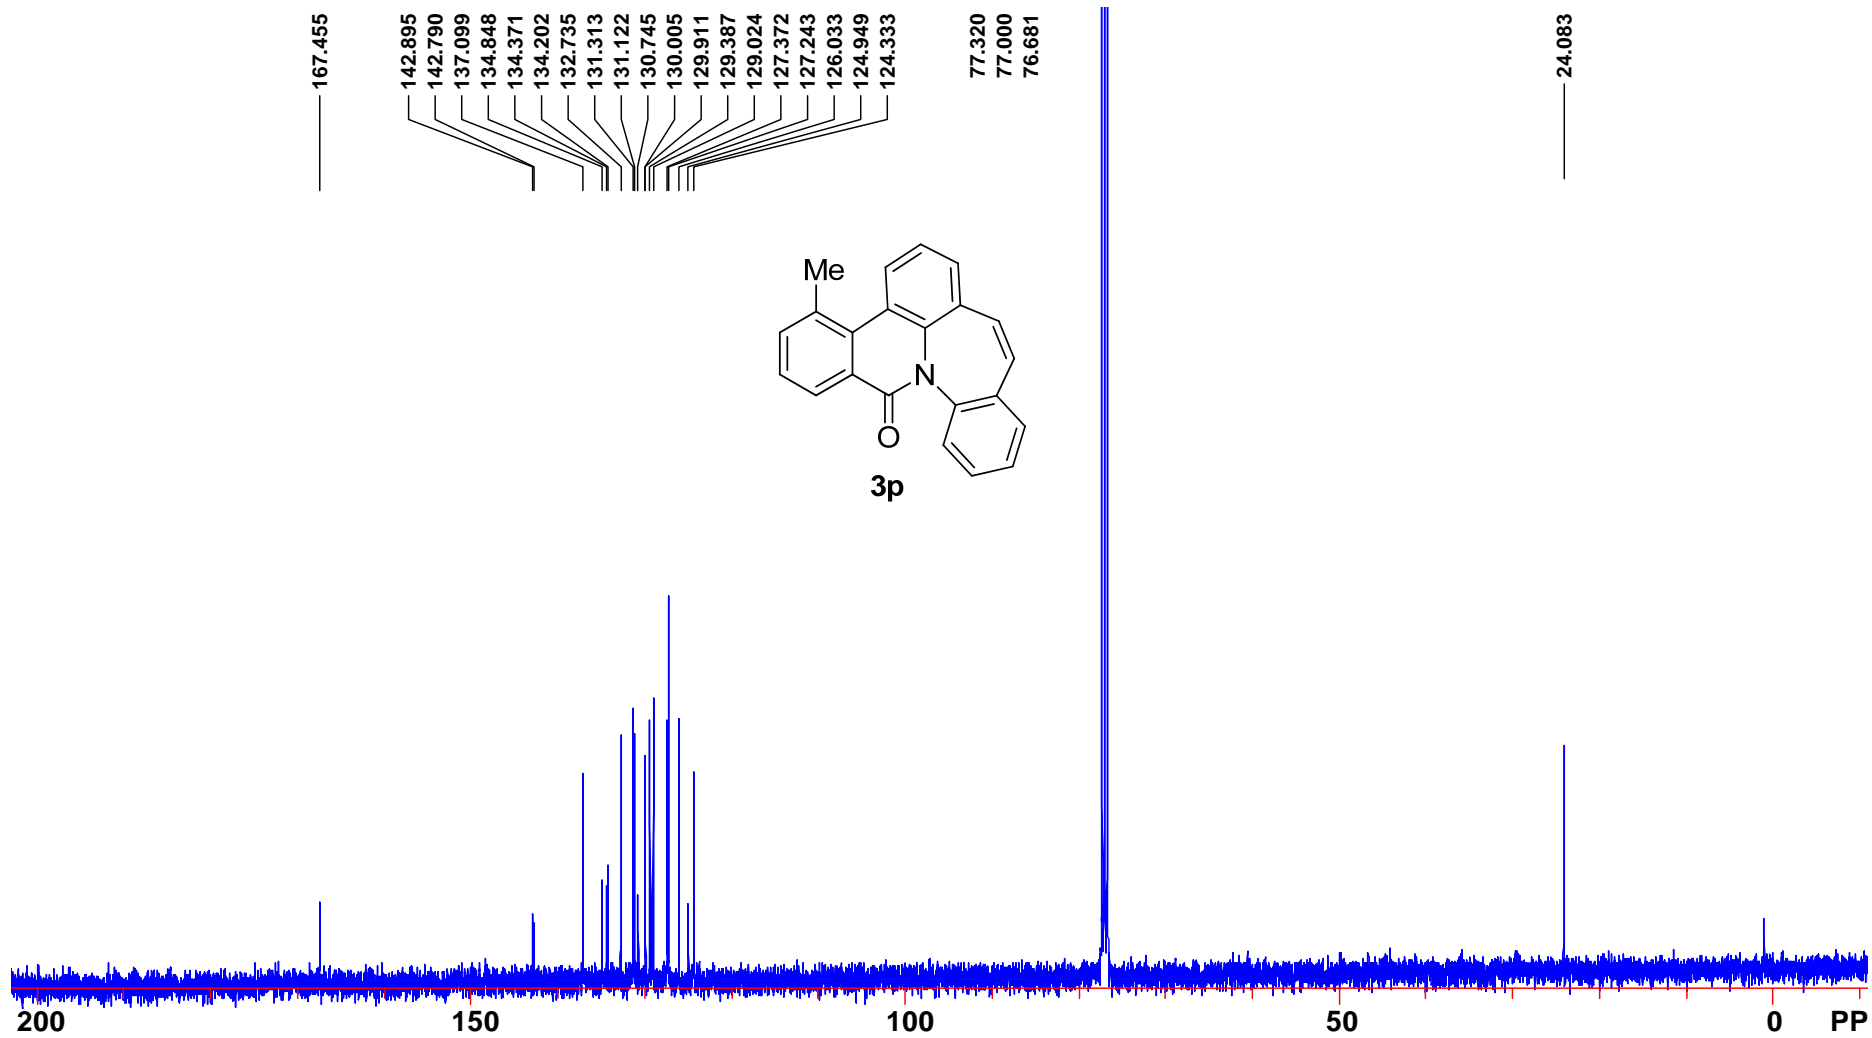

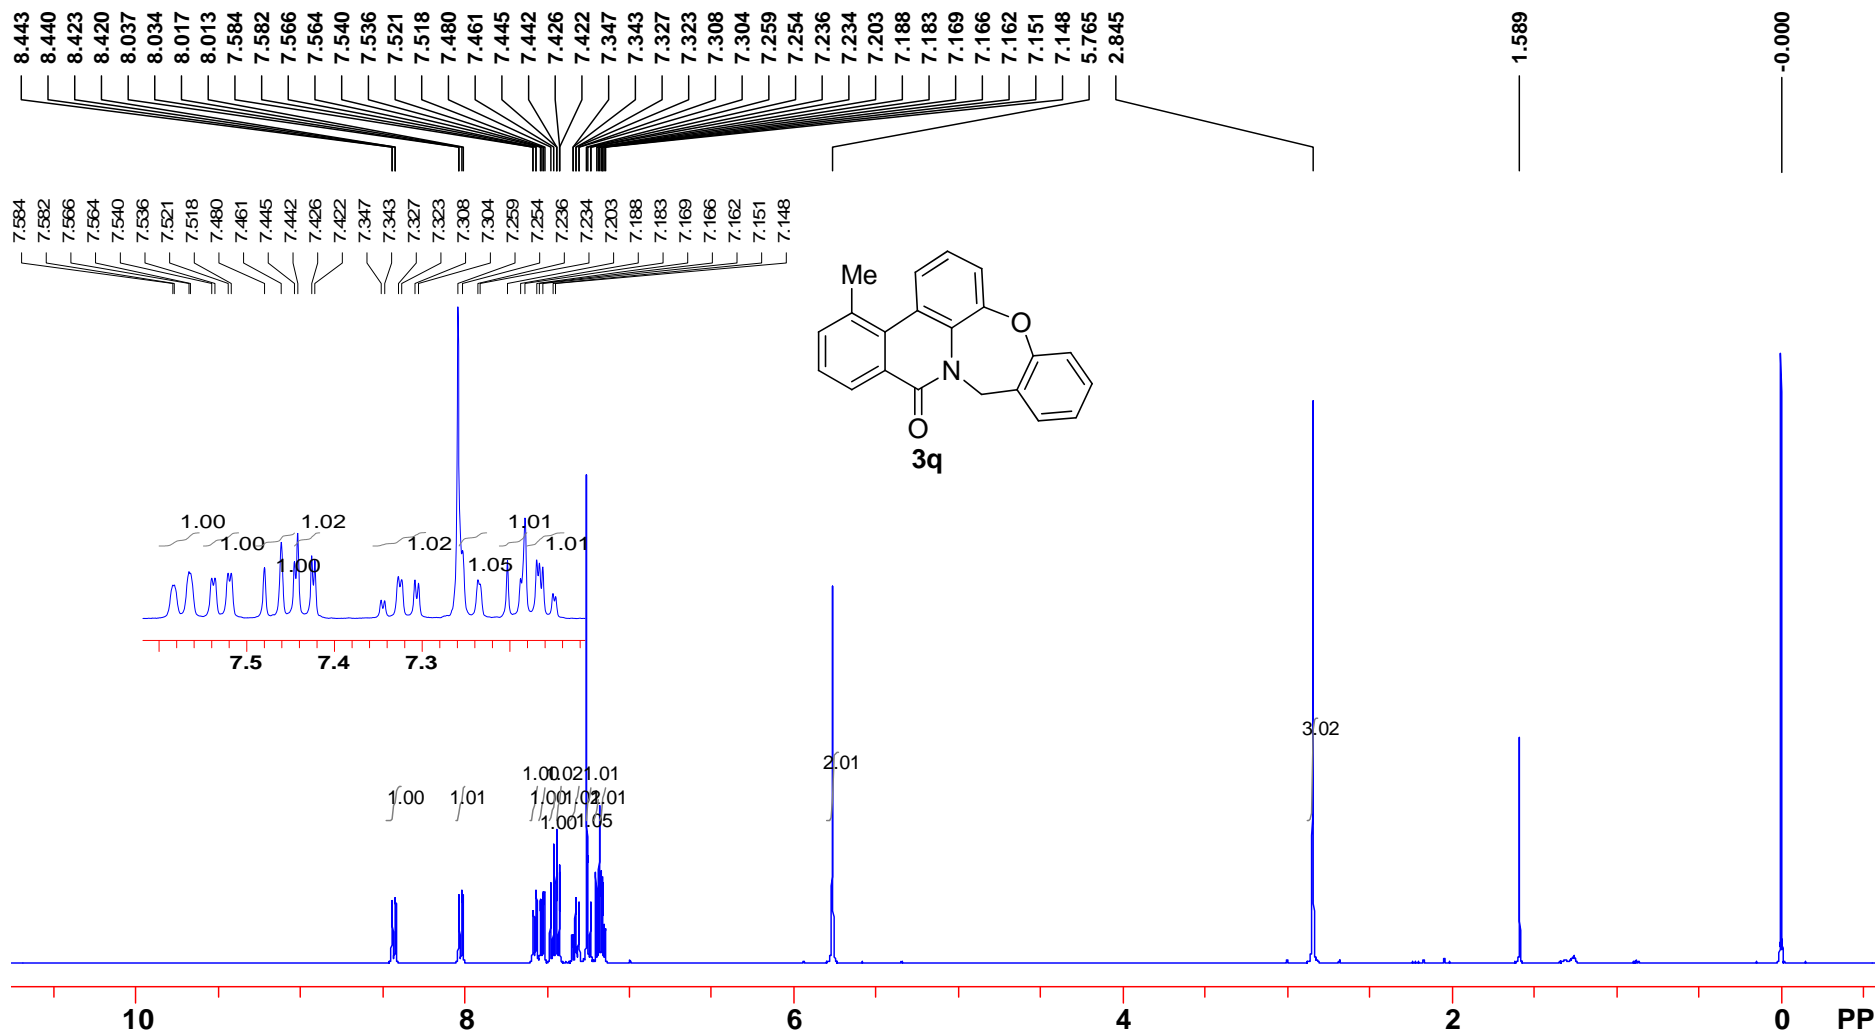

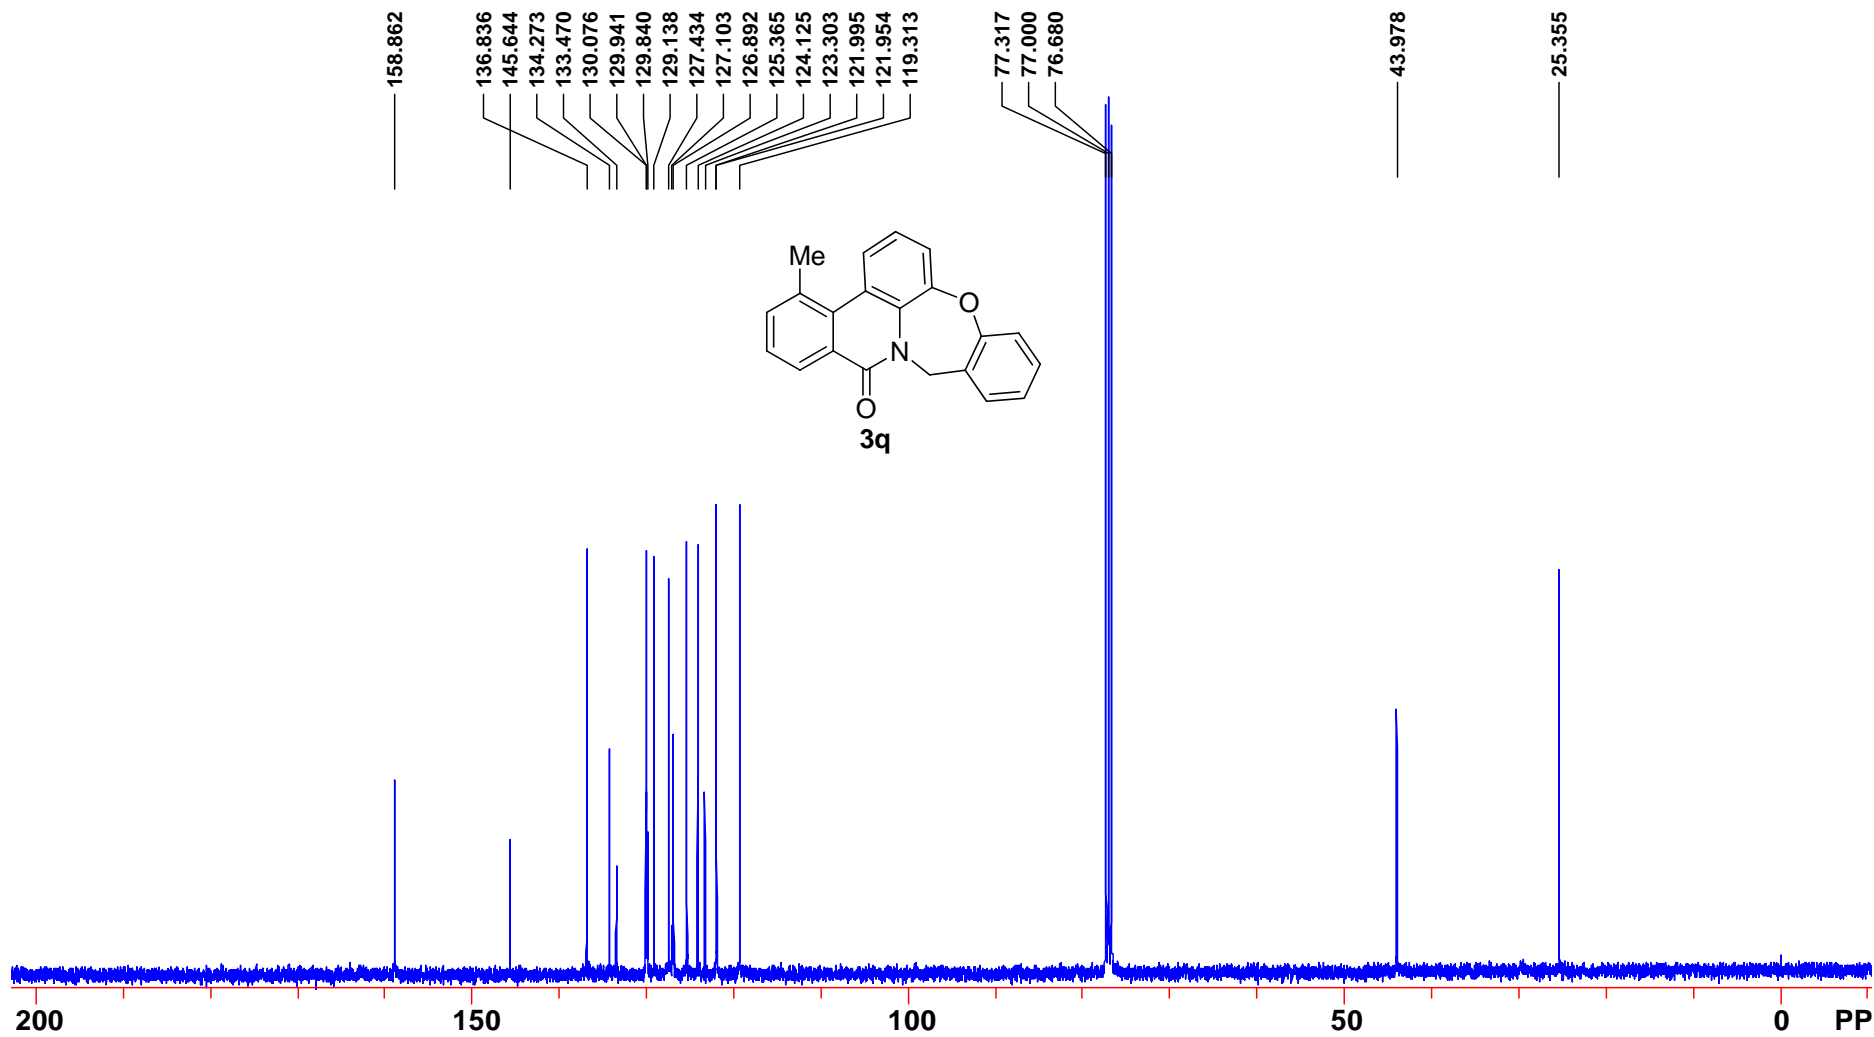

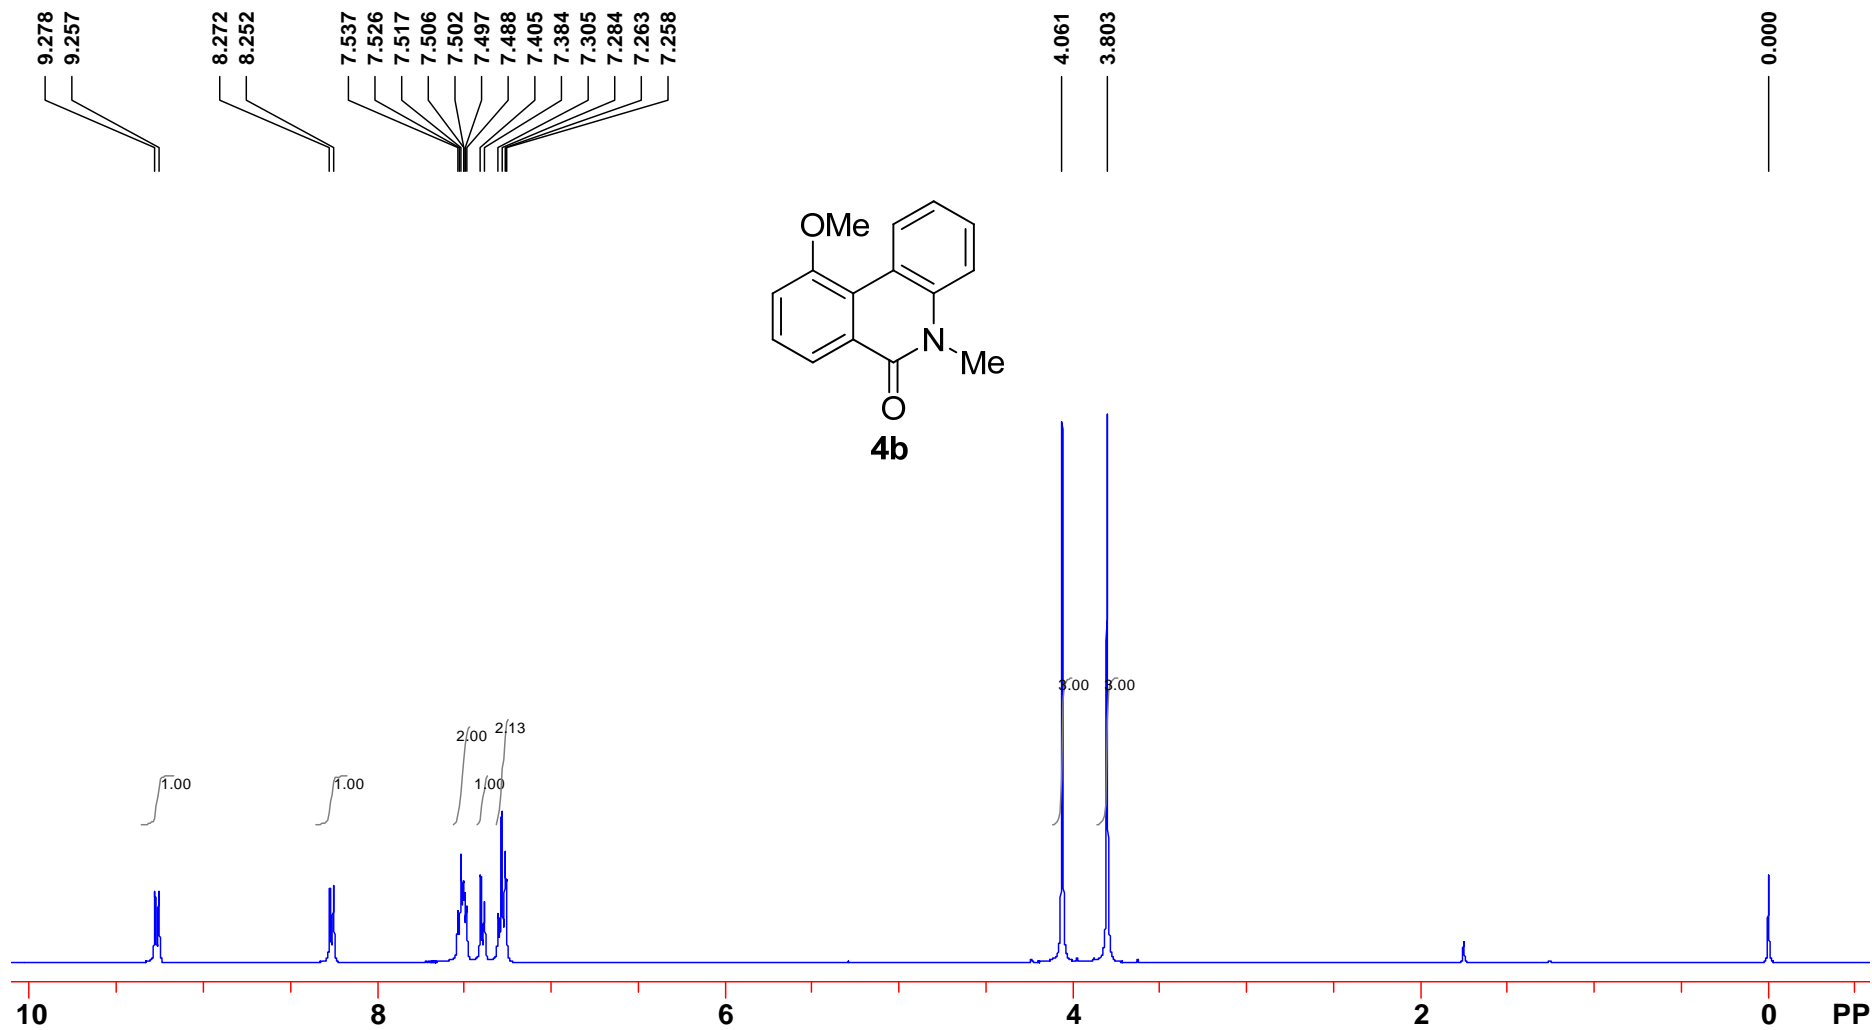

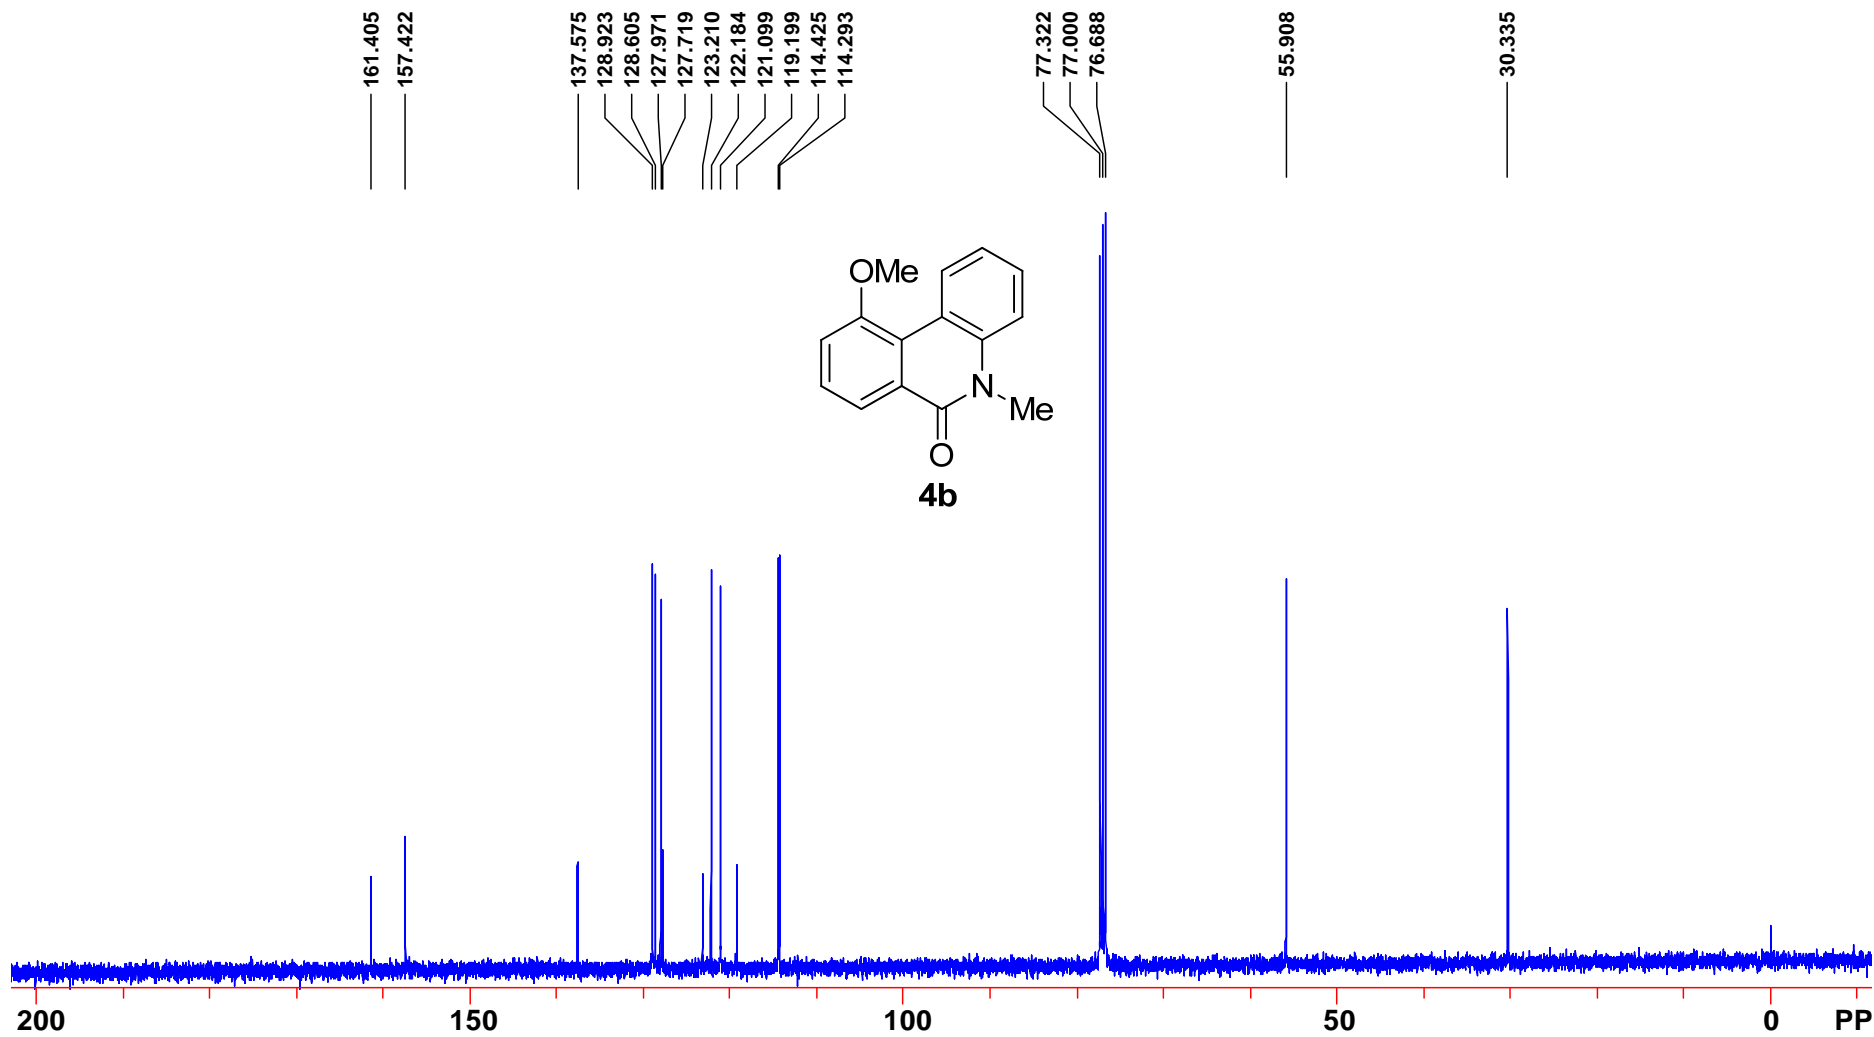

8.642  
8.633  
8.622  
8.610  
8.602  
7.573  
7.561  
7.469  
7.461  
7.447  
7.429  
7.415  
7.399  
7.395  
7.378  
7.362  
7.357  
7.350  
7.341  
7.250  
6.790  
6.780  
6.769  
6.759  
6.748

3.799

0.000

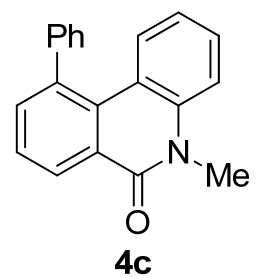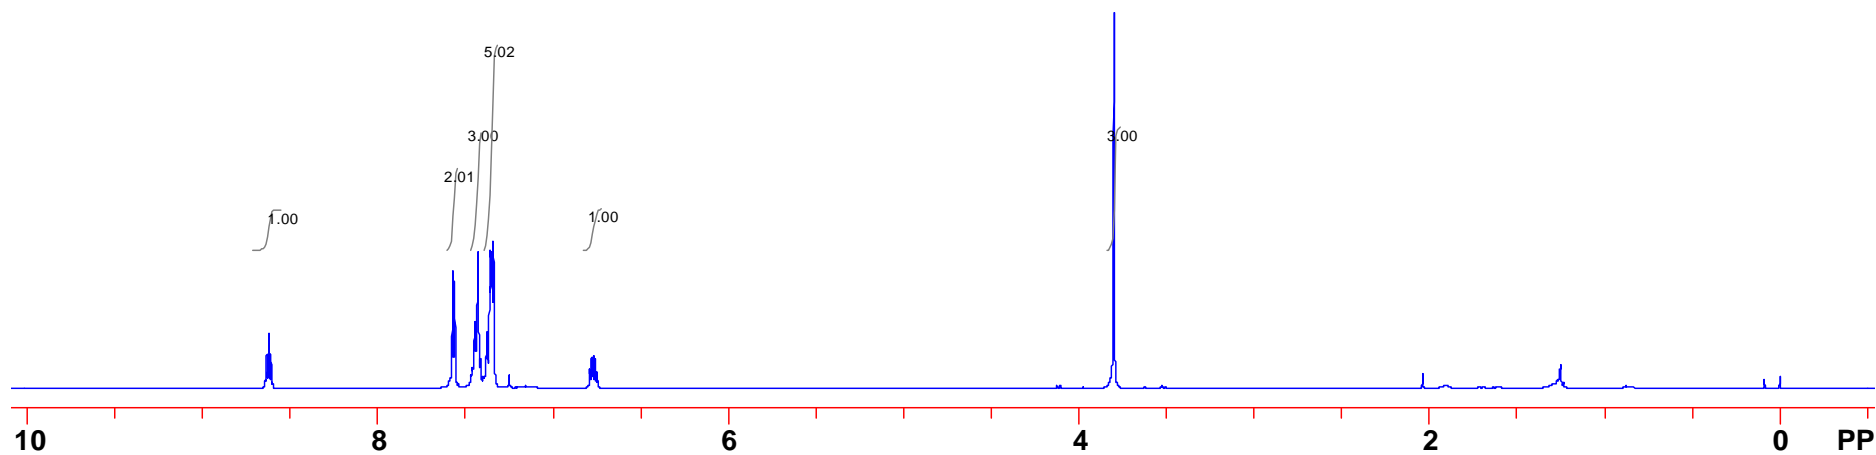

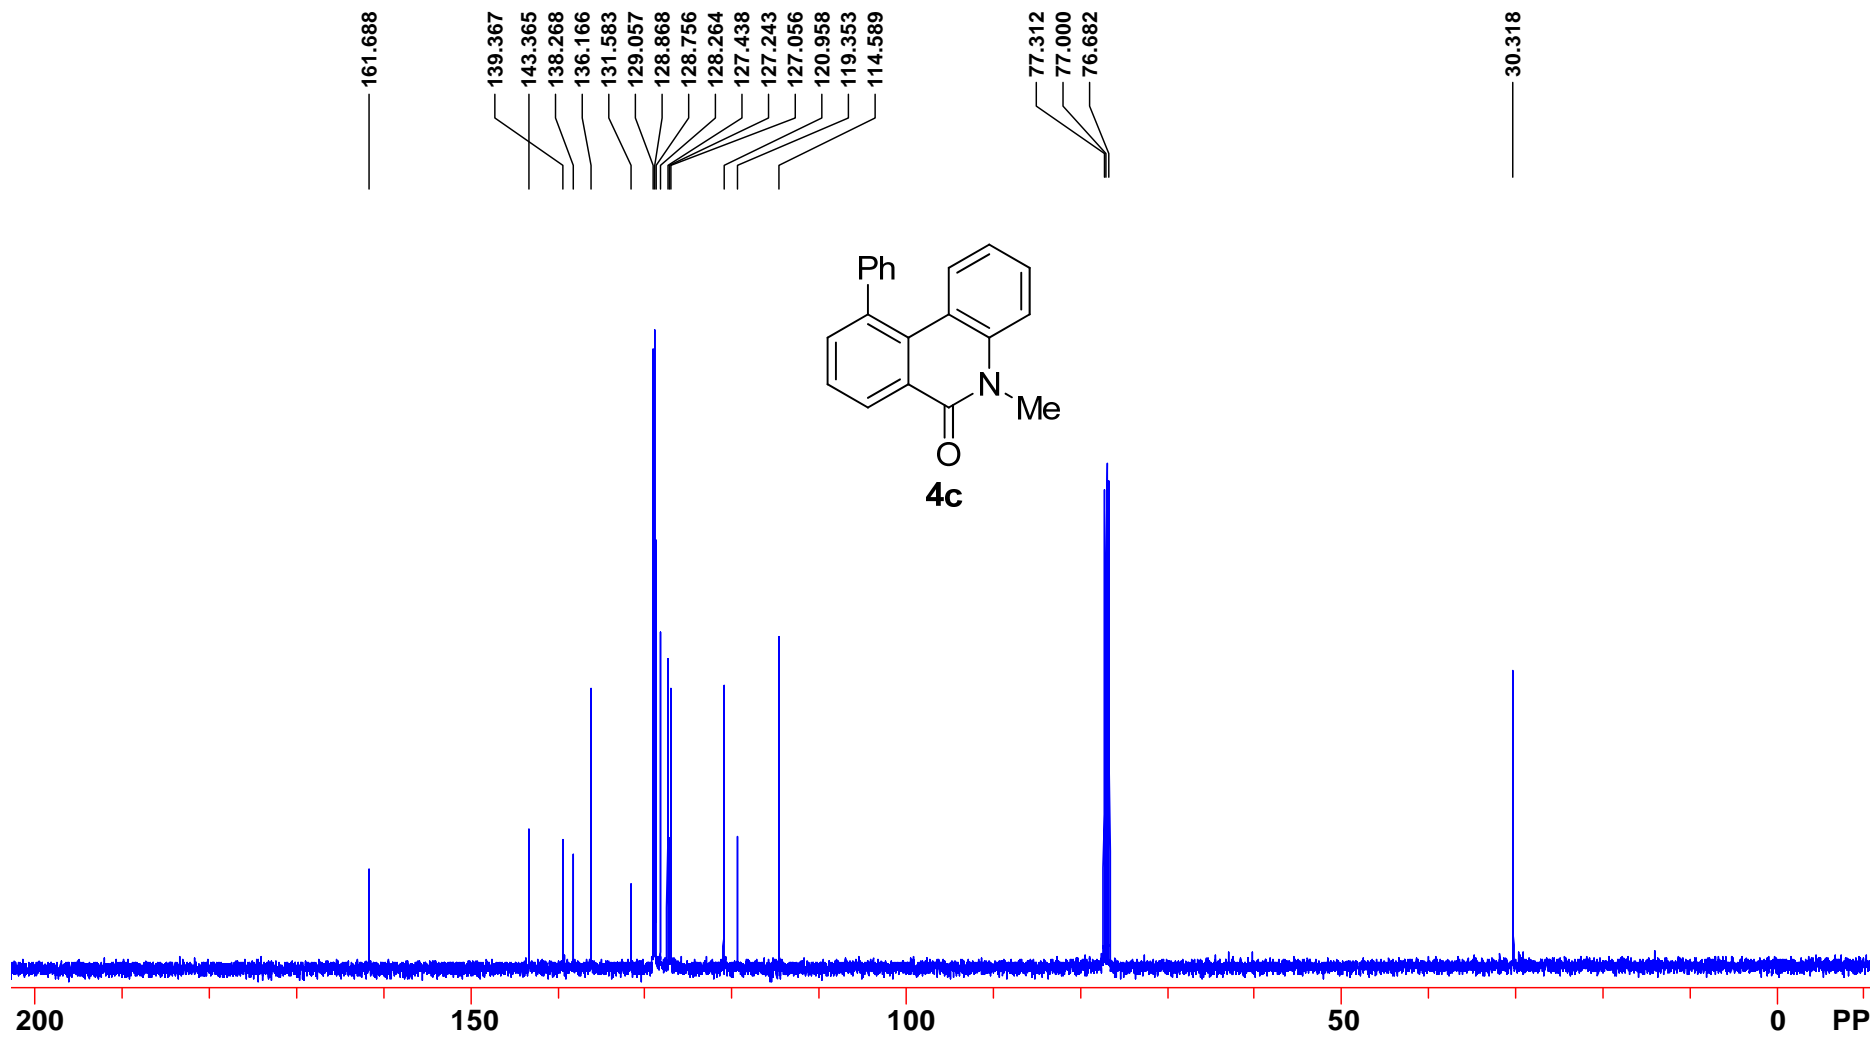

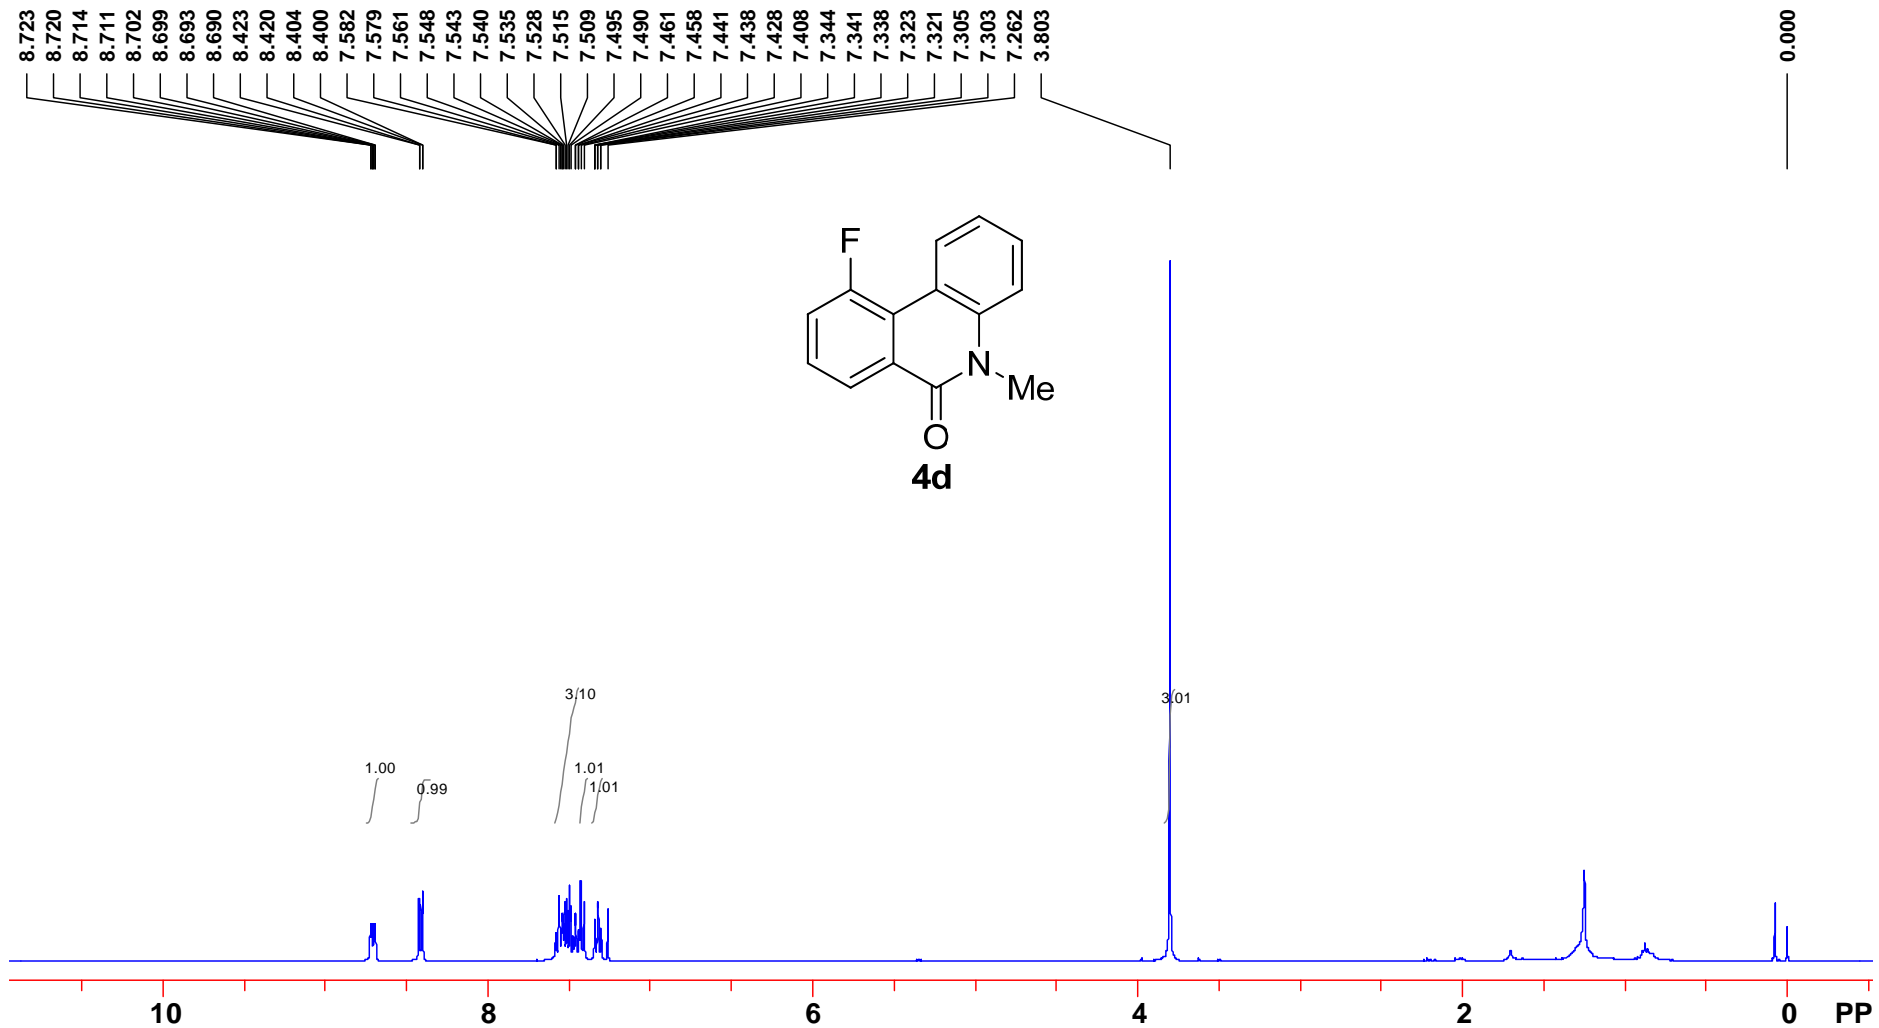



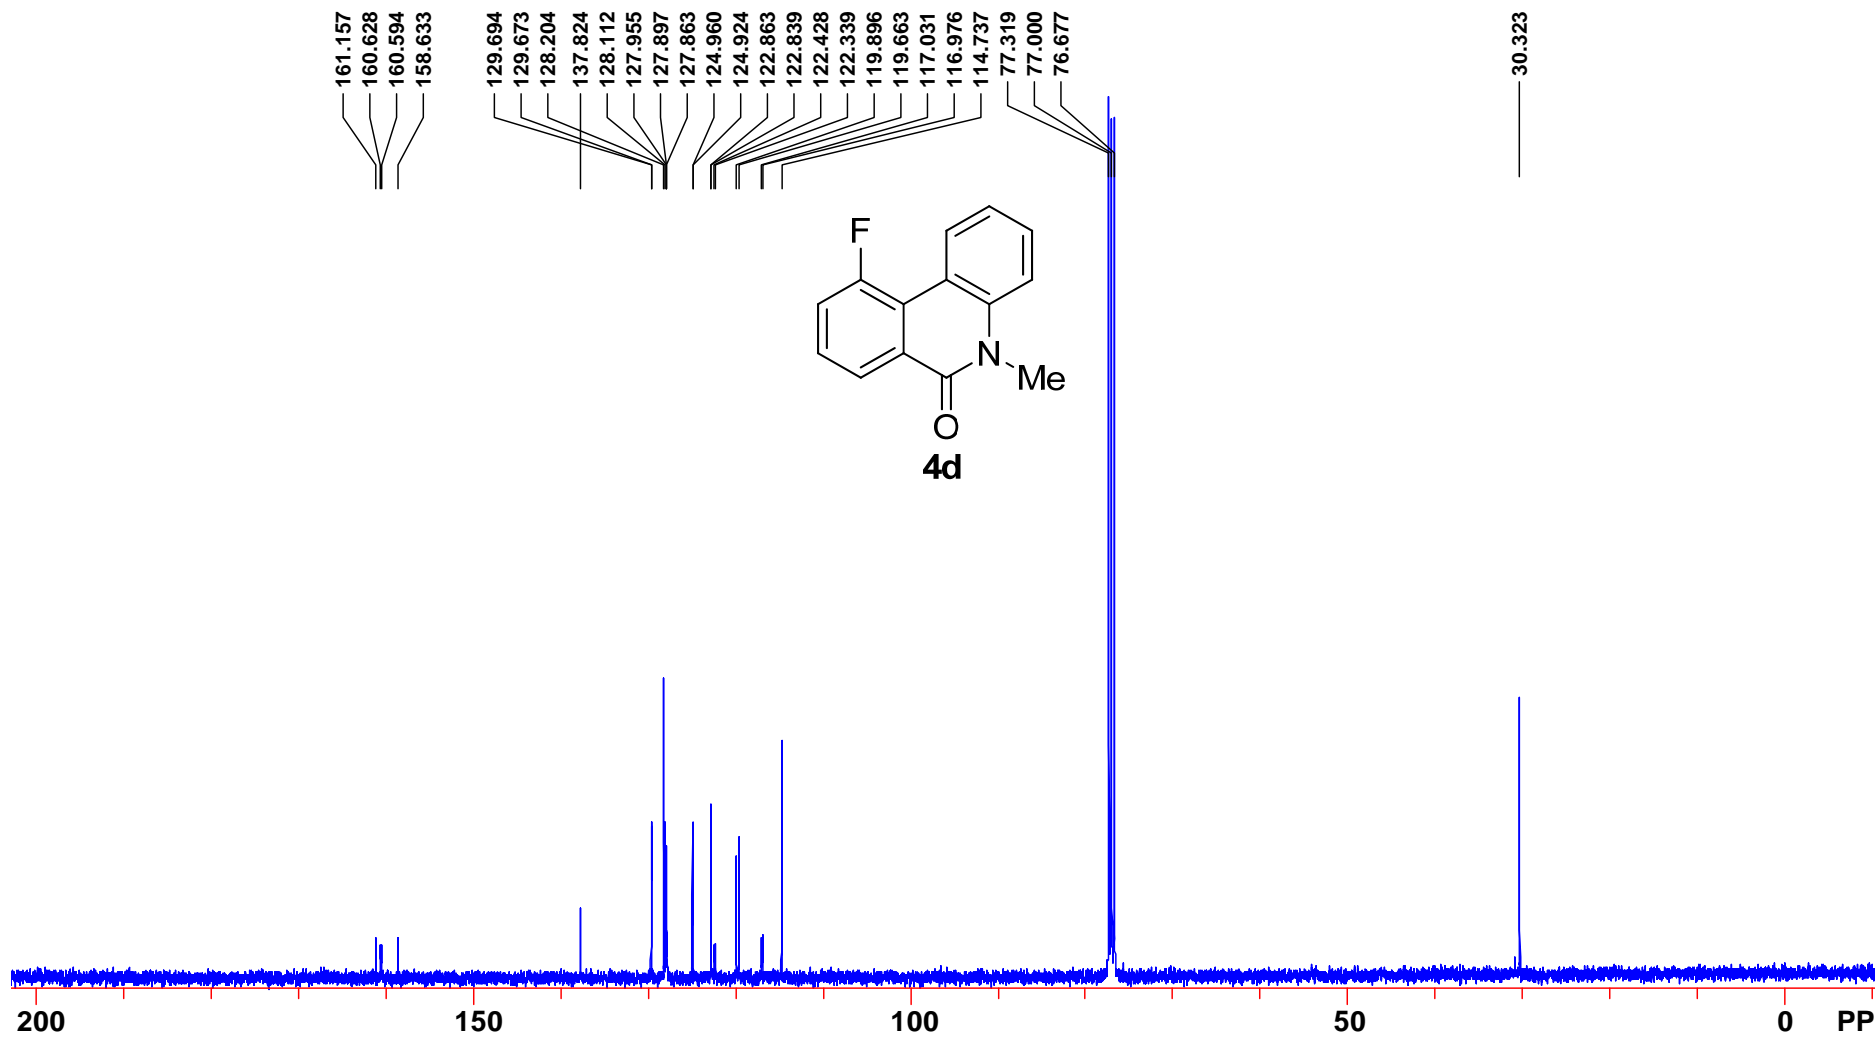

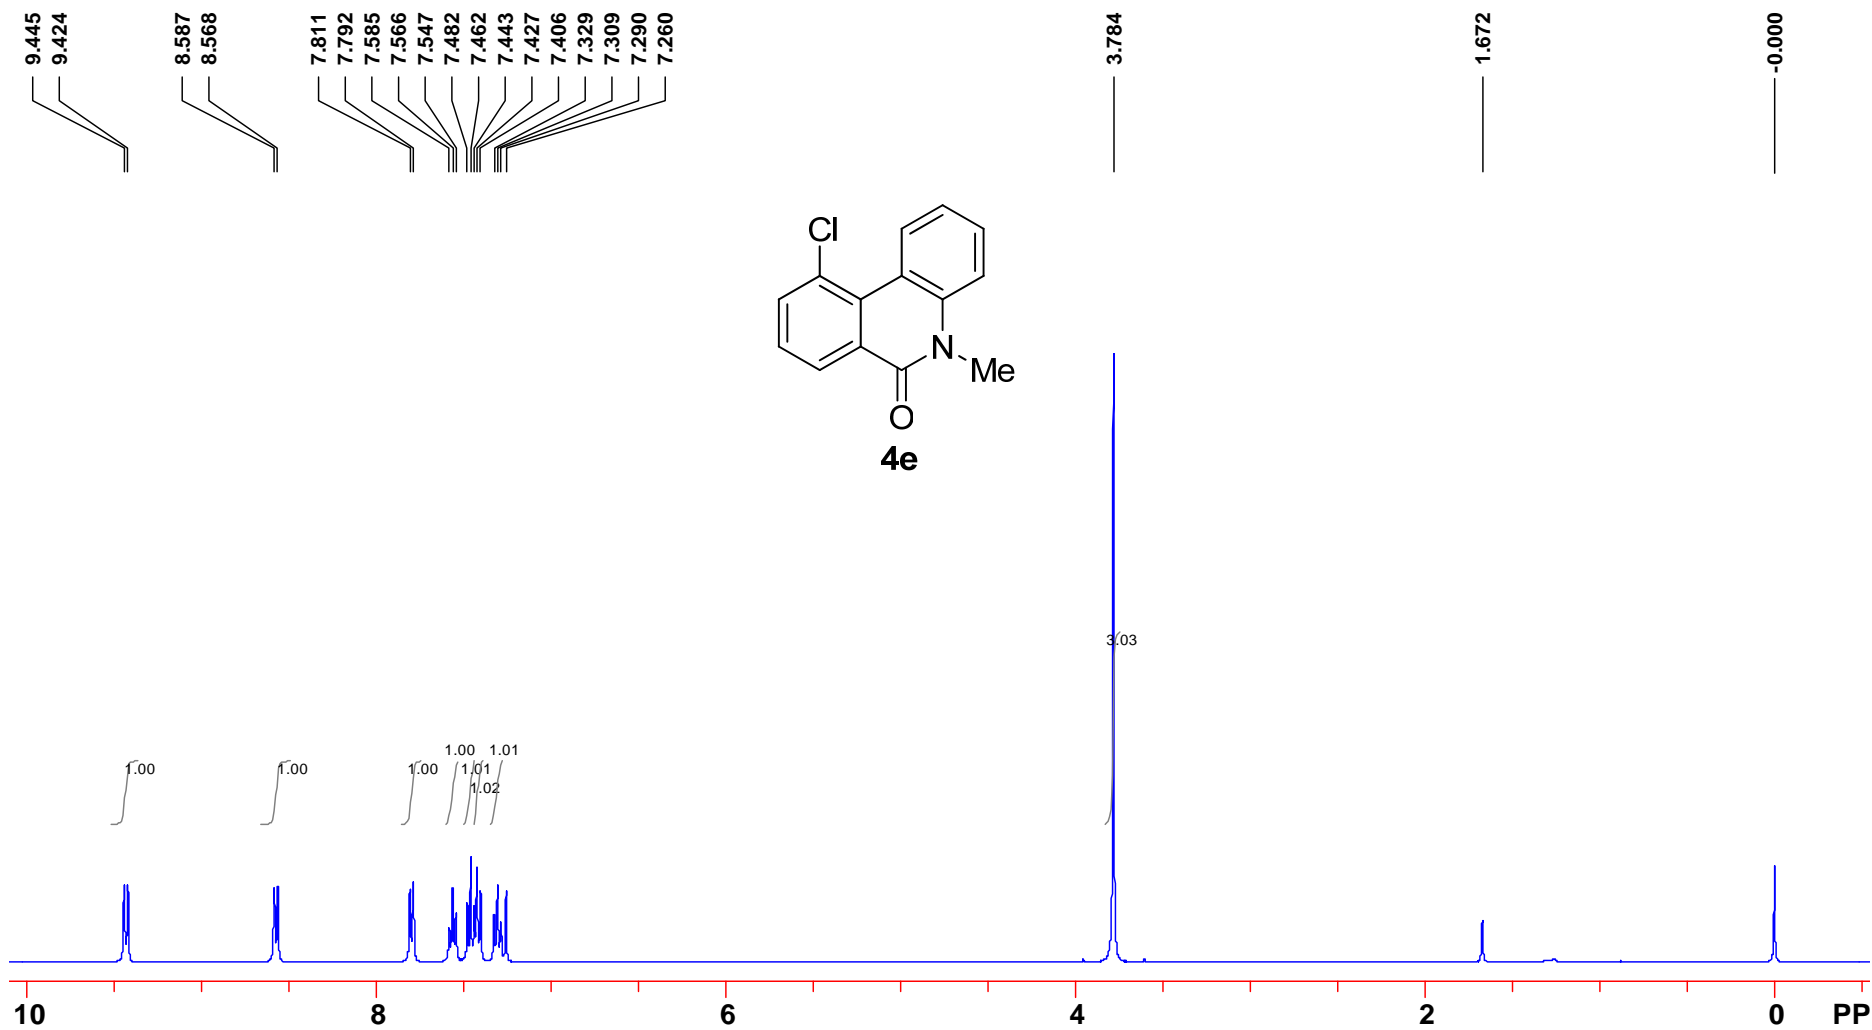

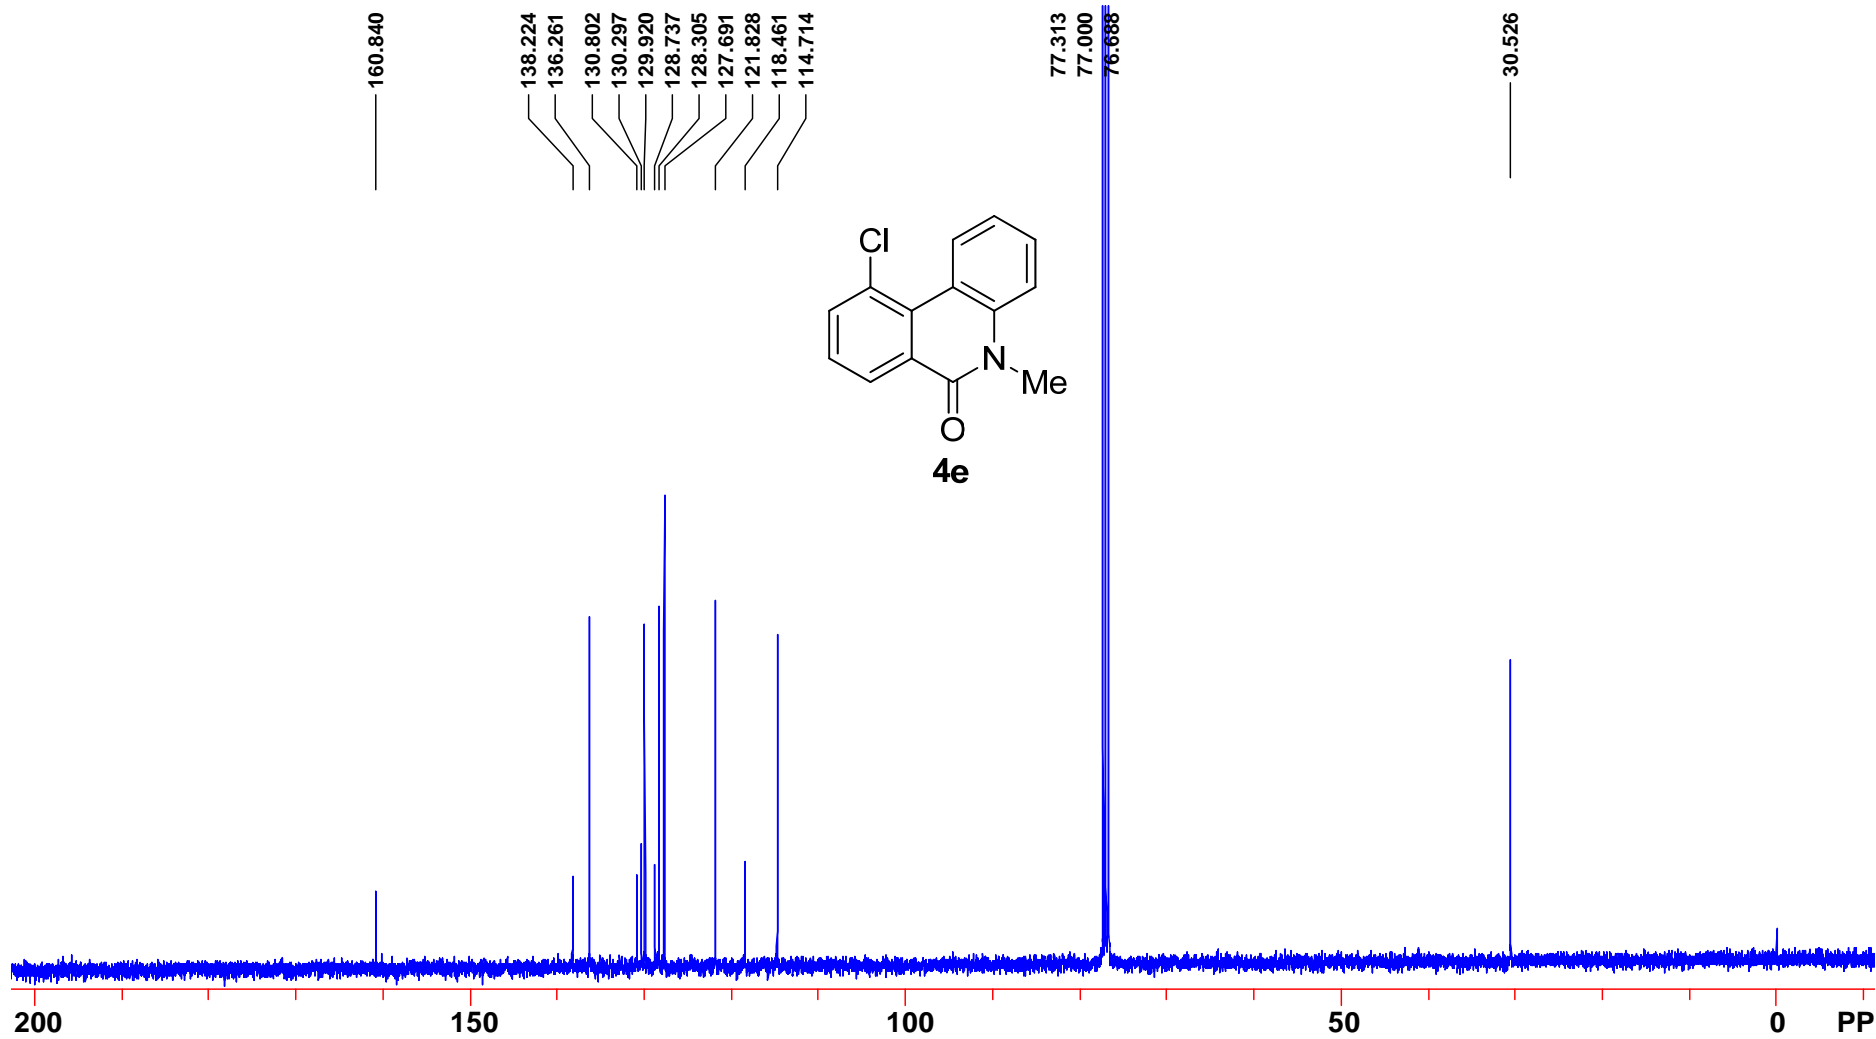

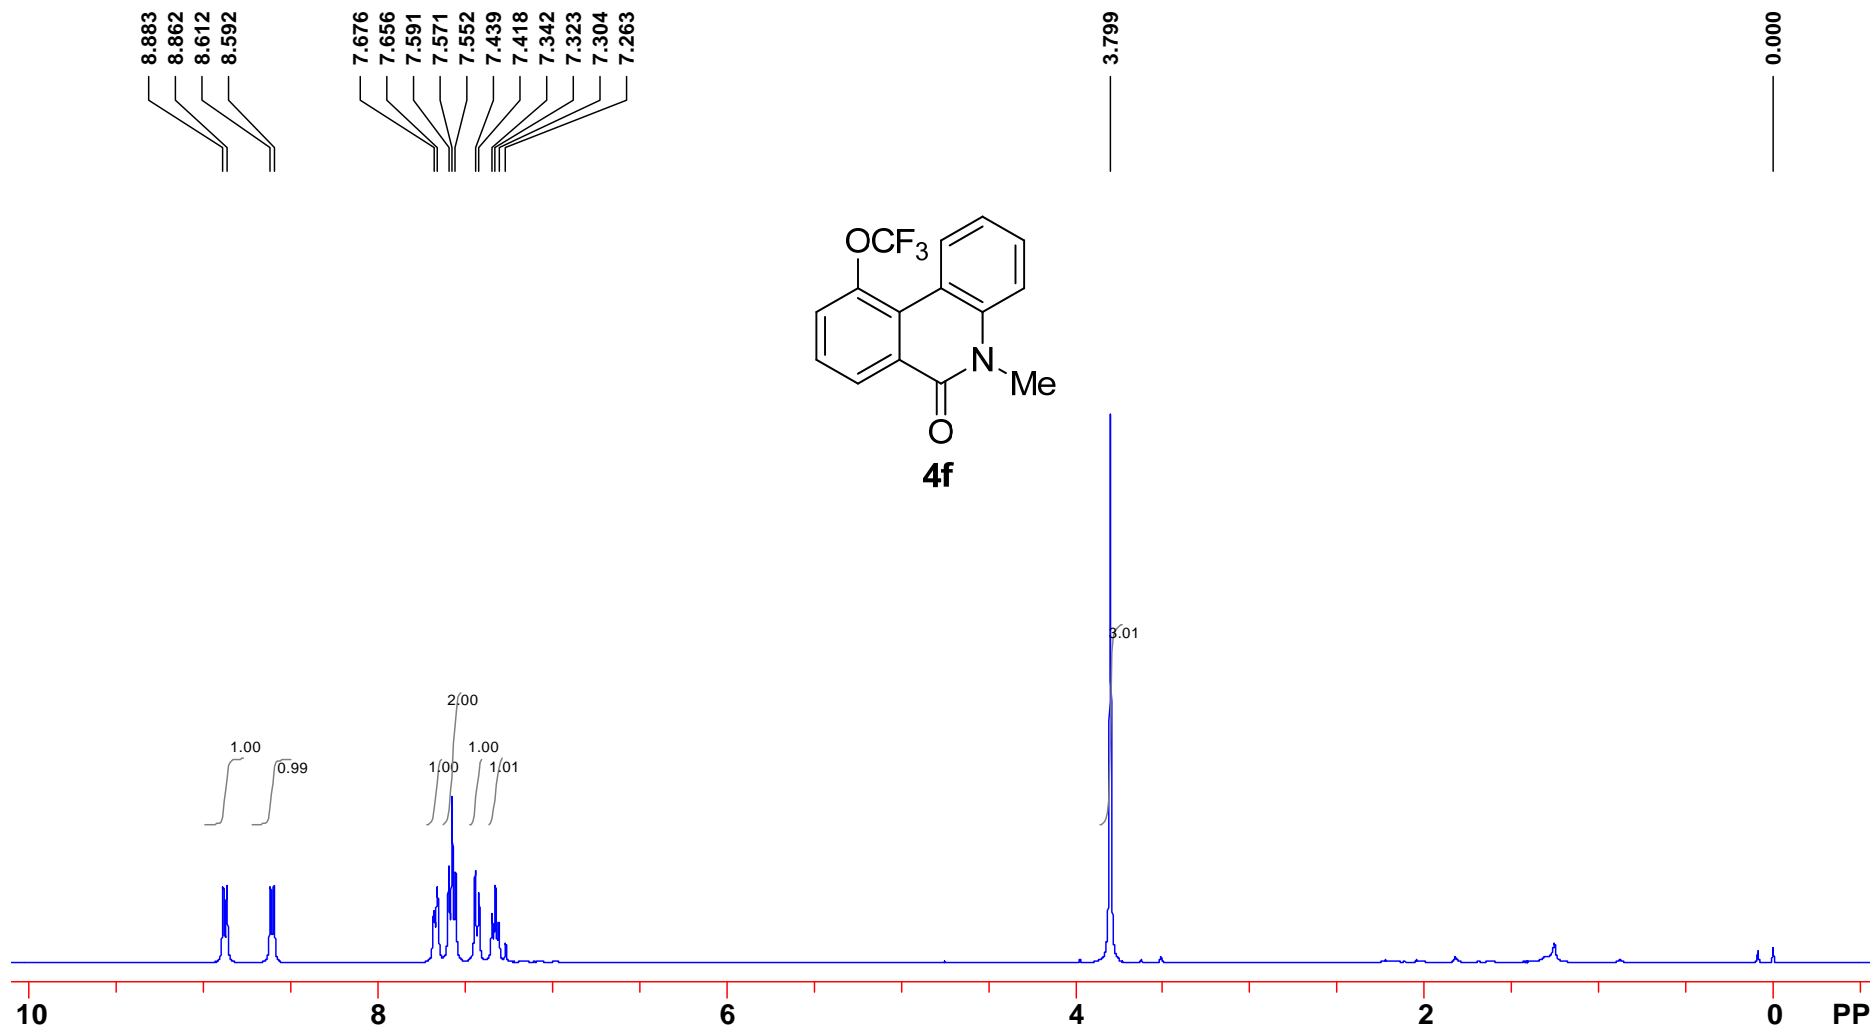

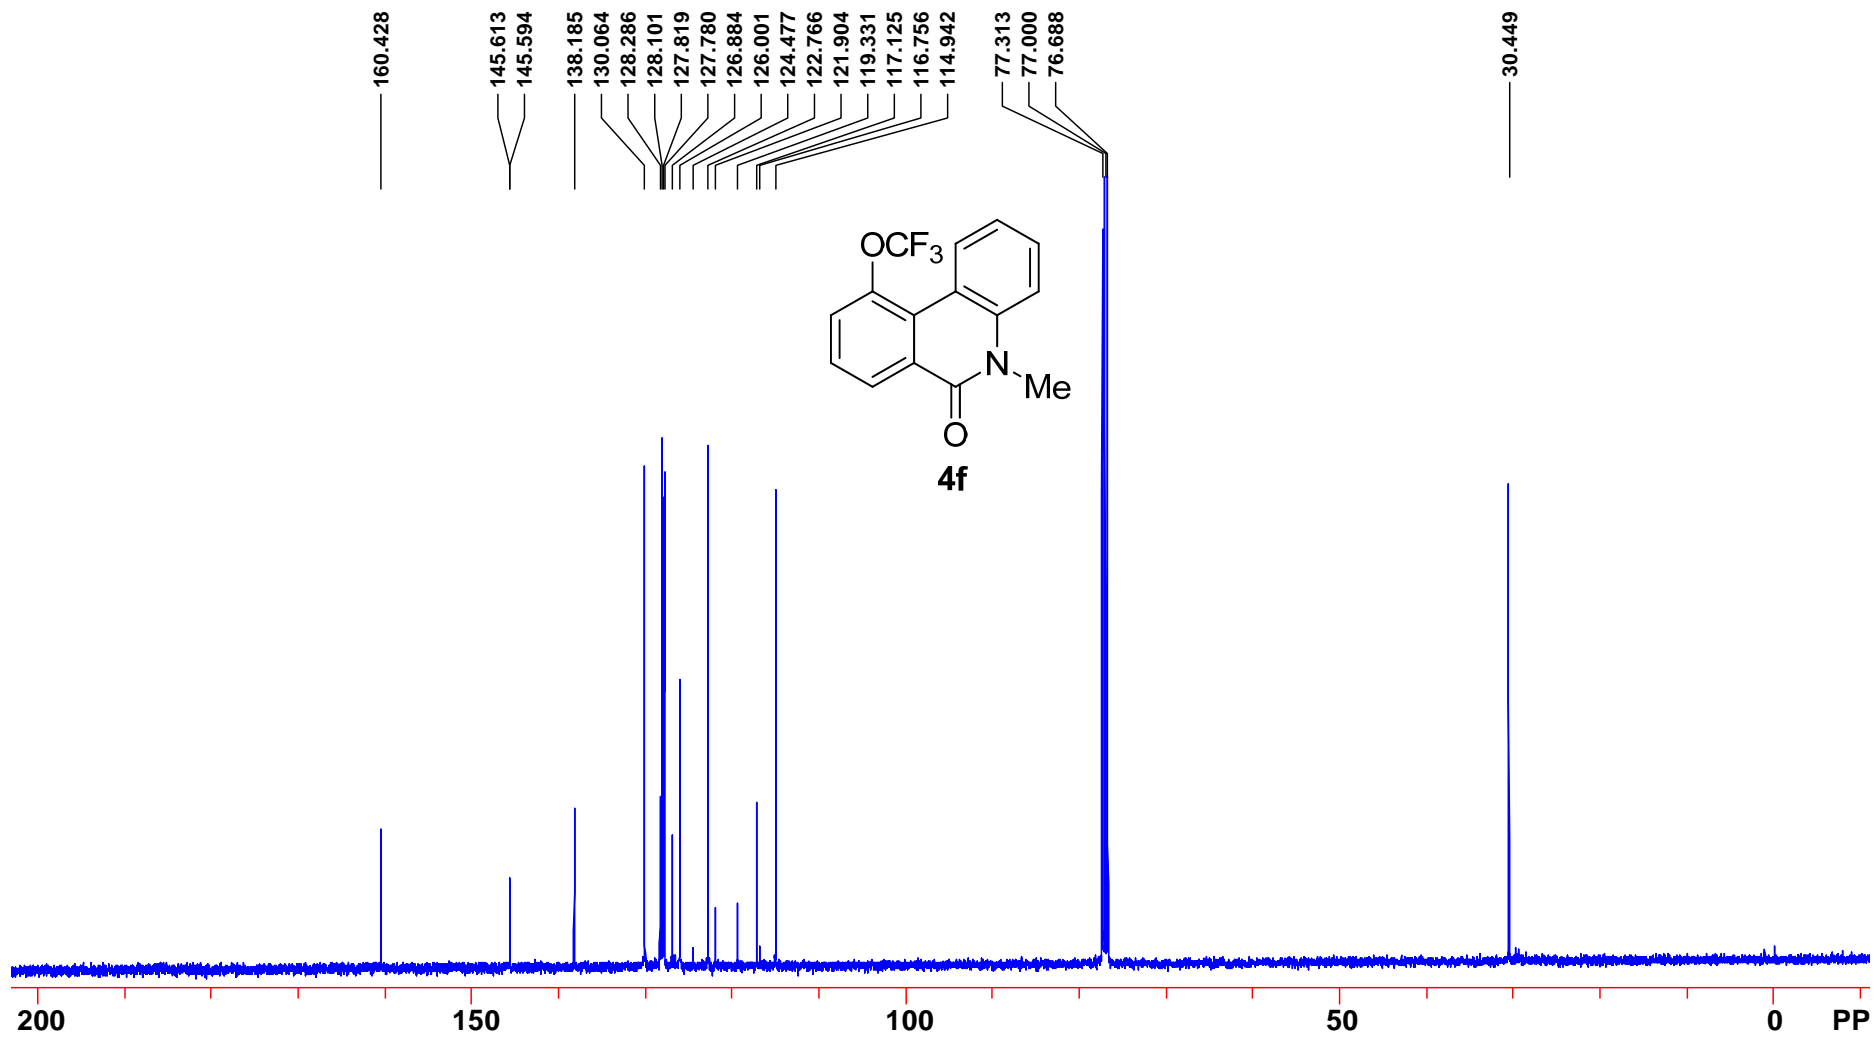

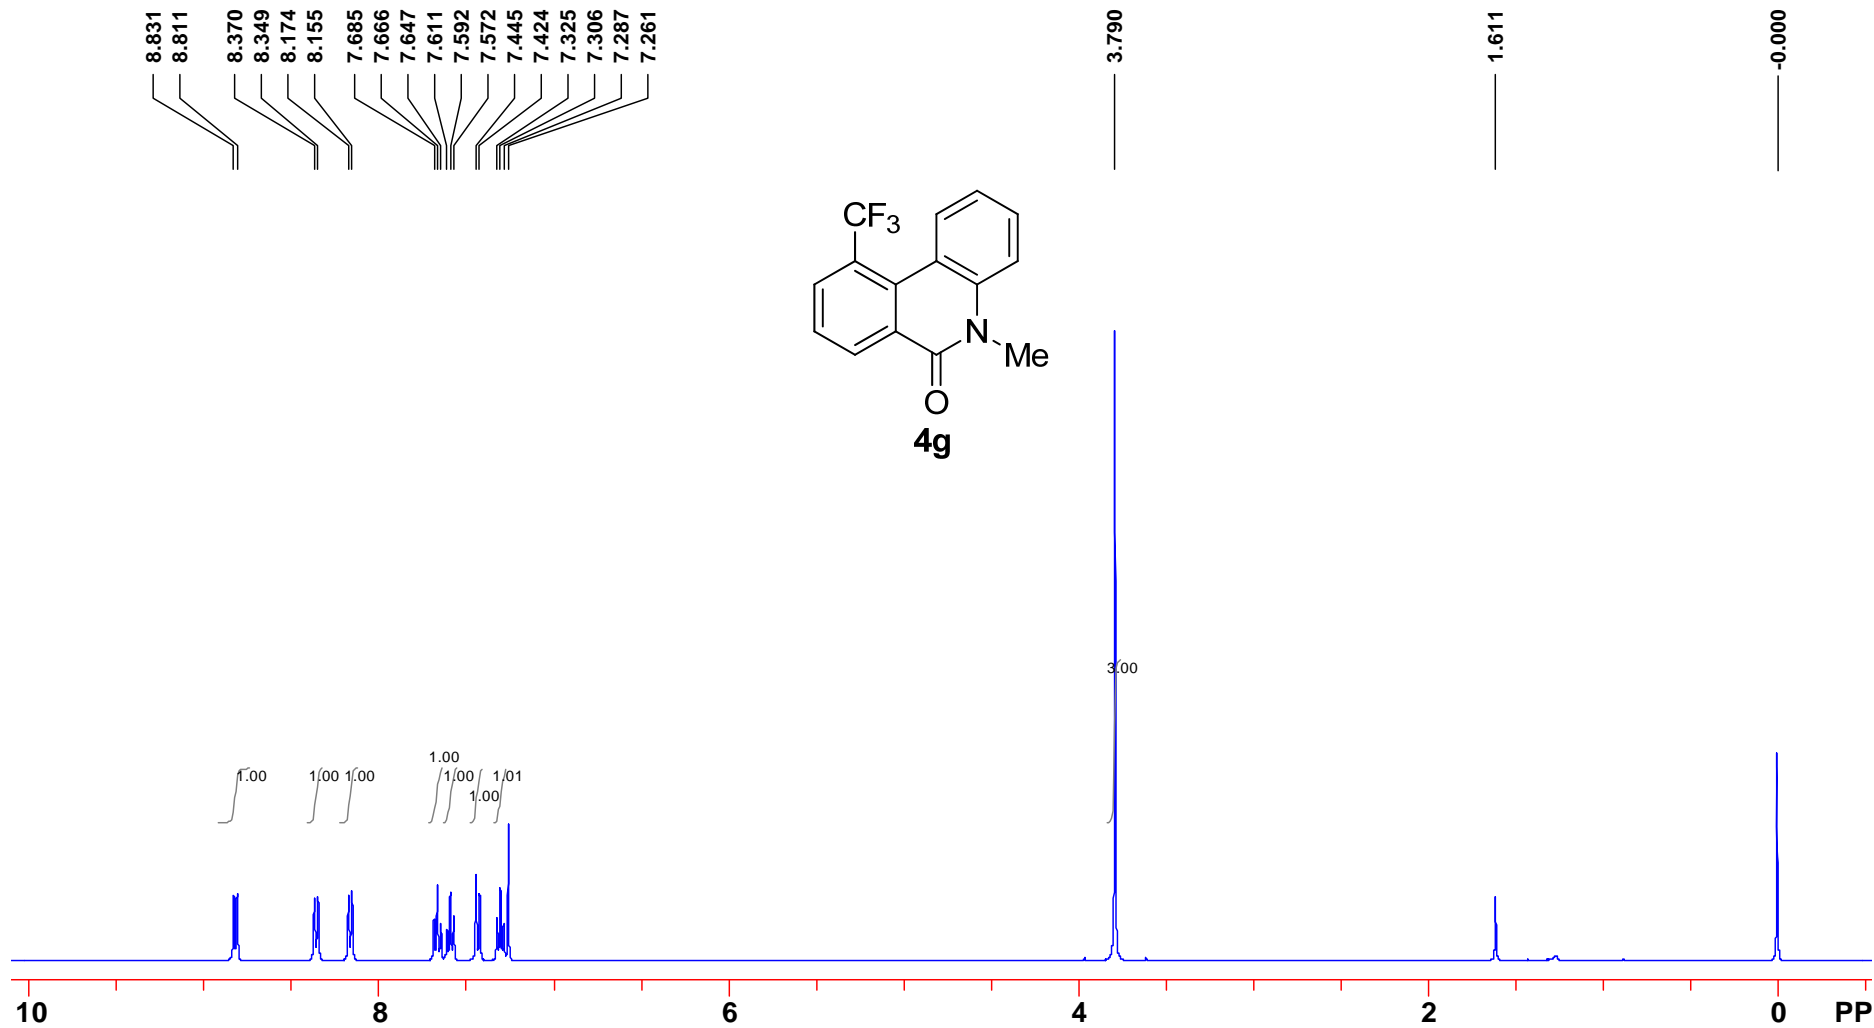

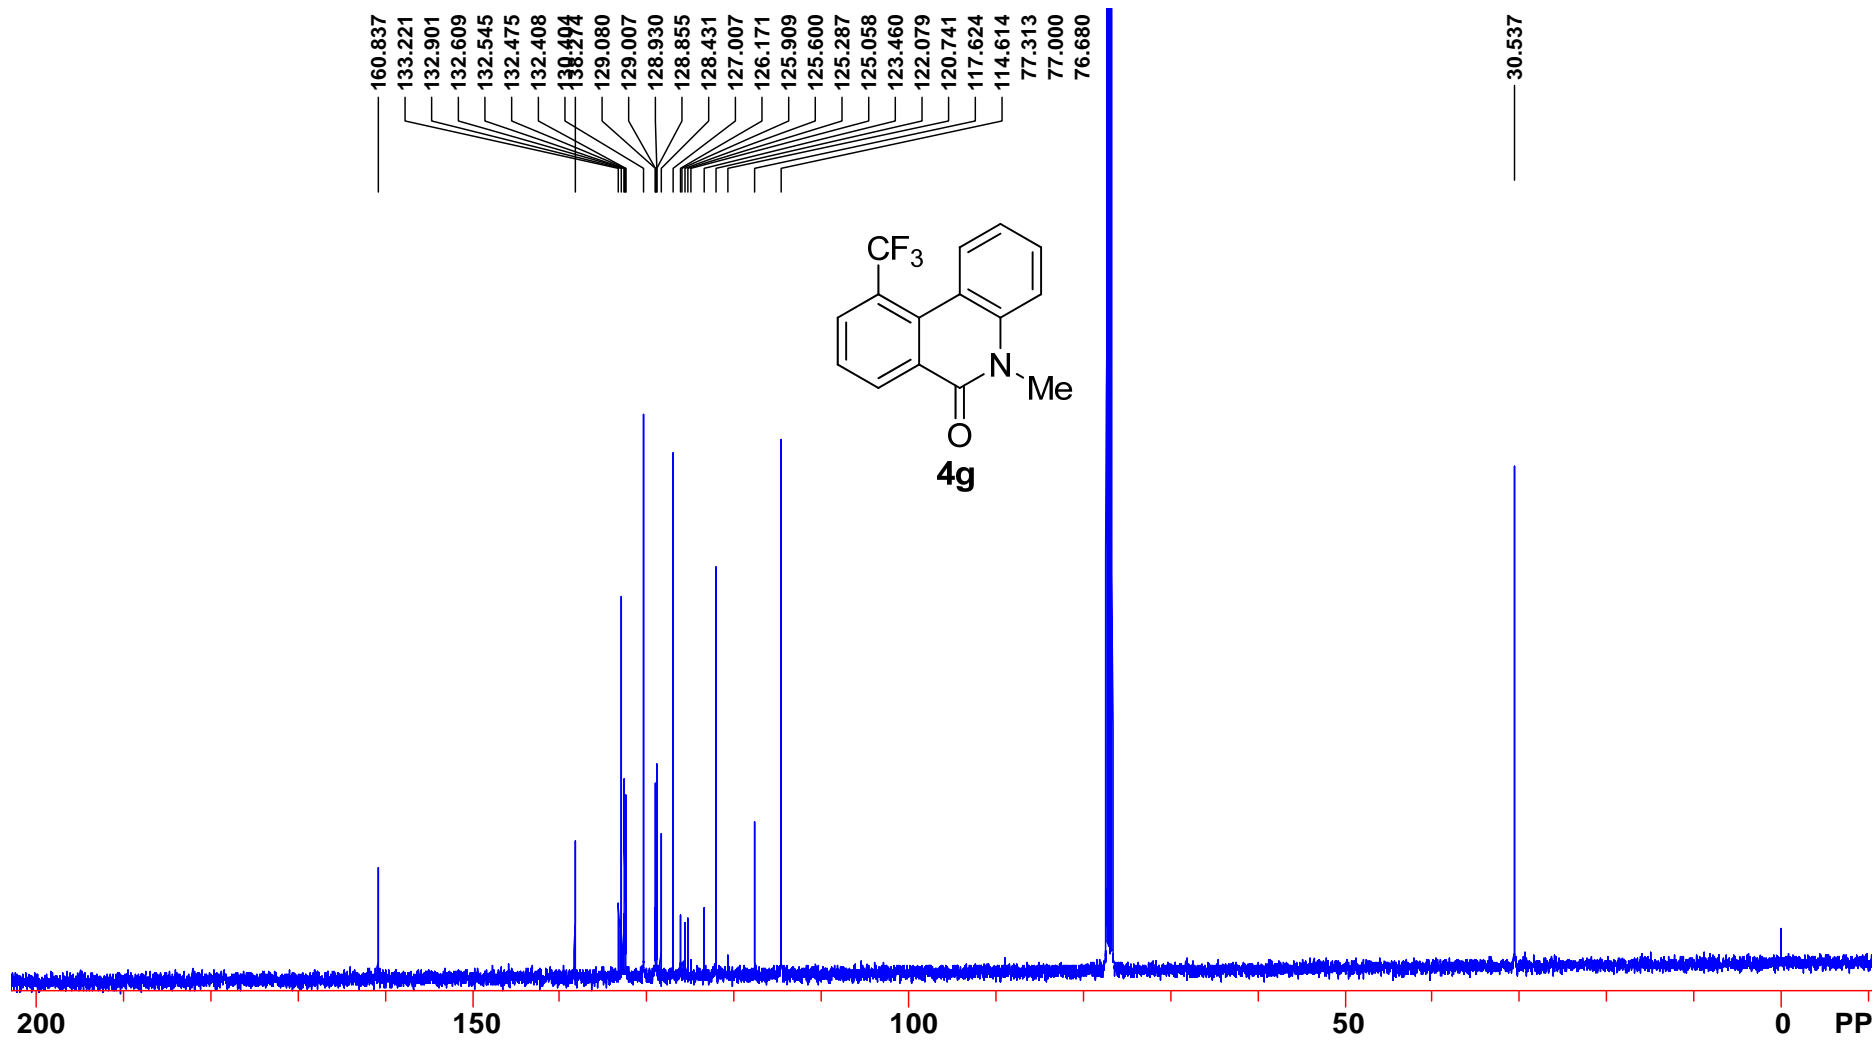

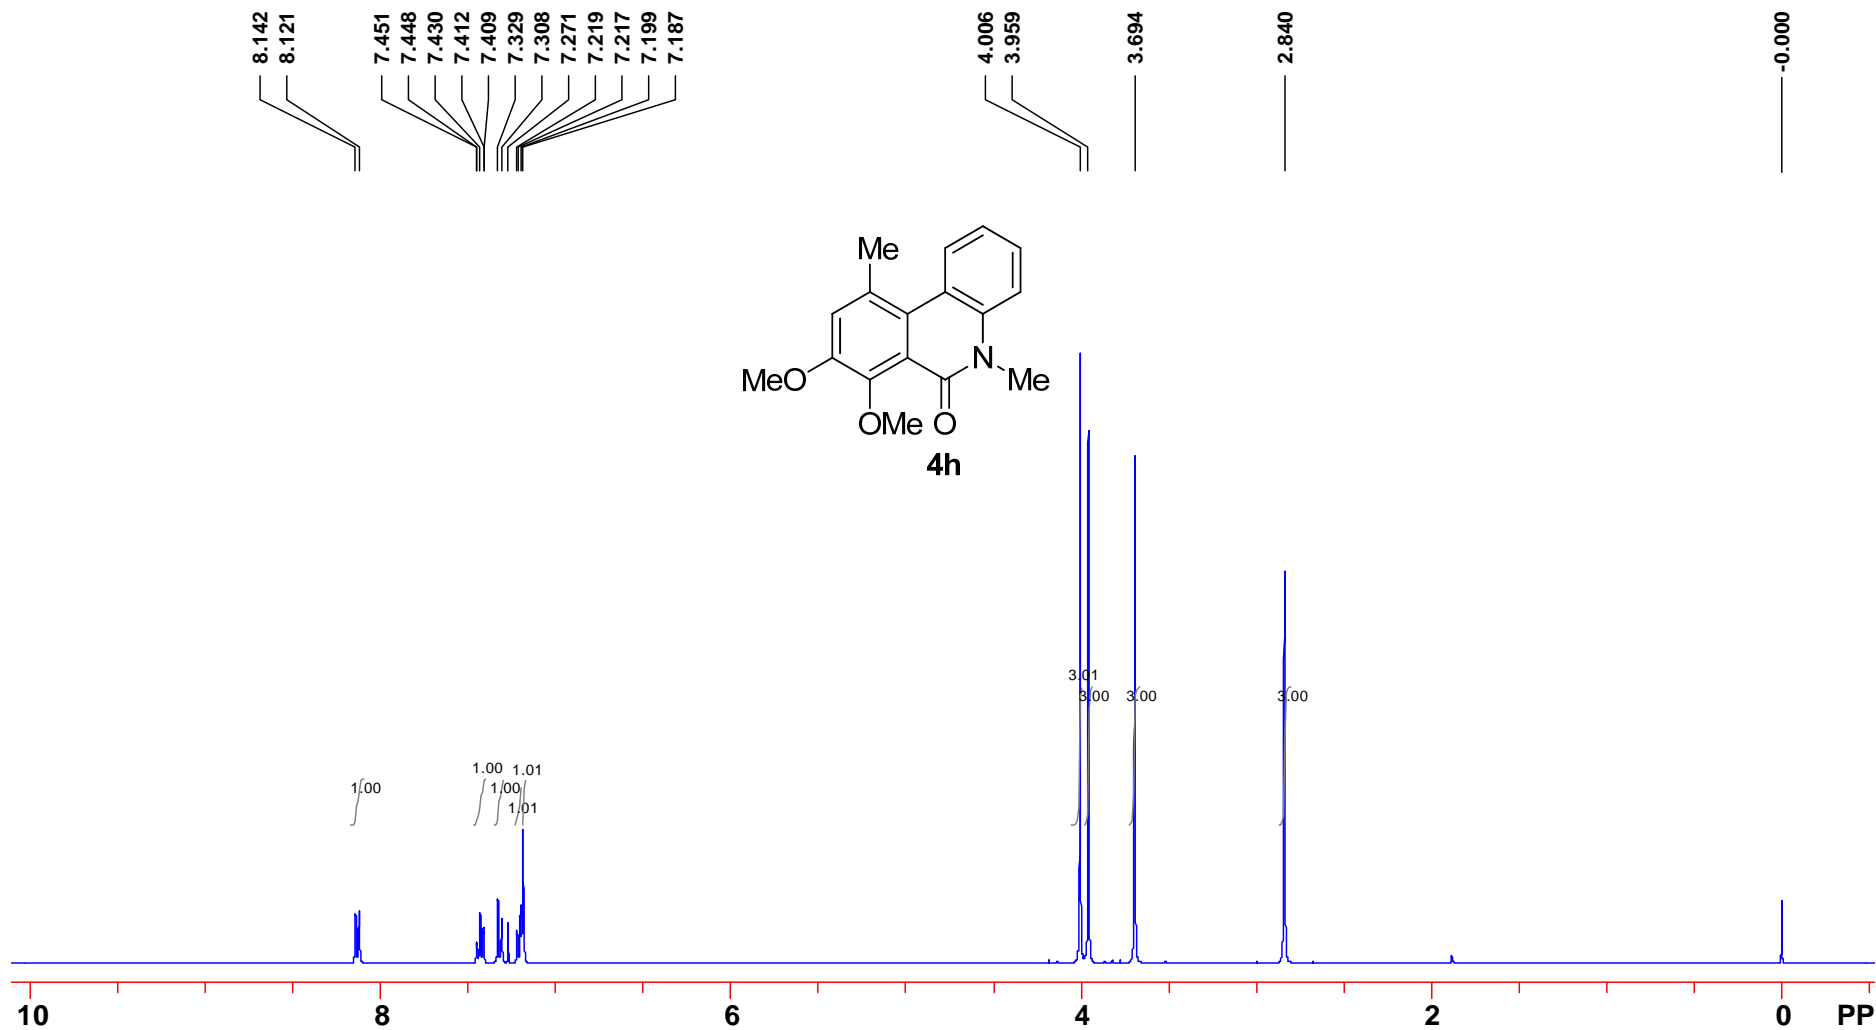



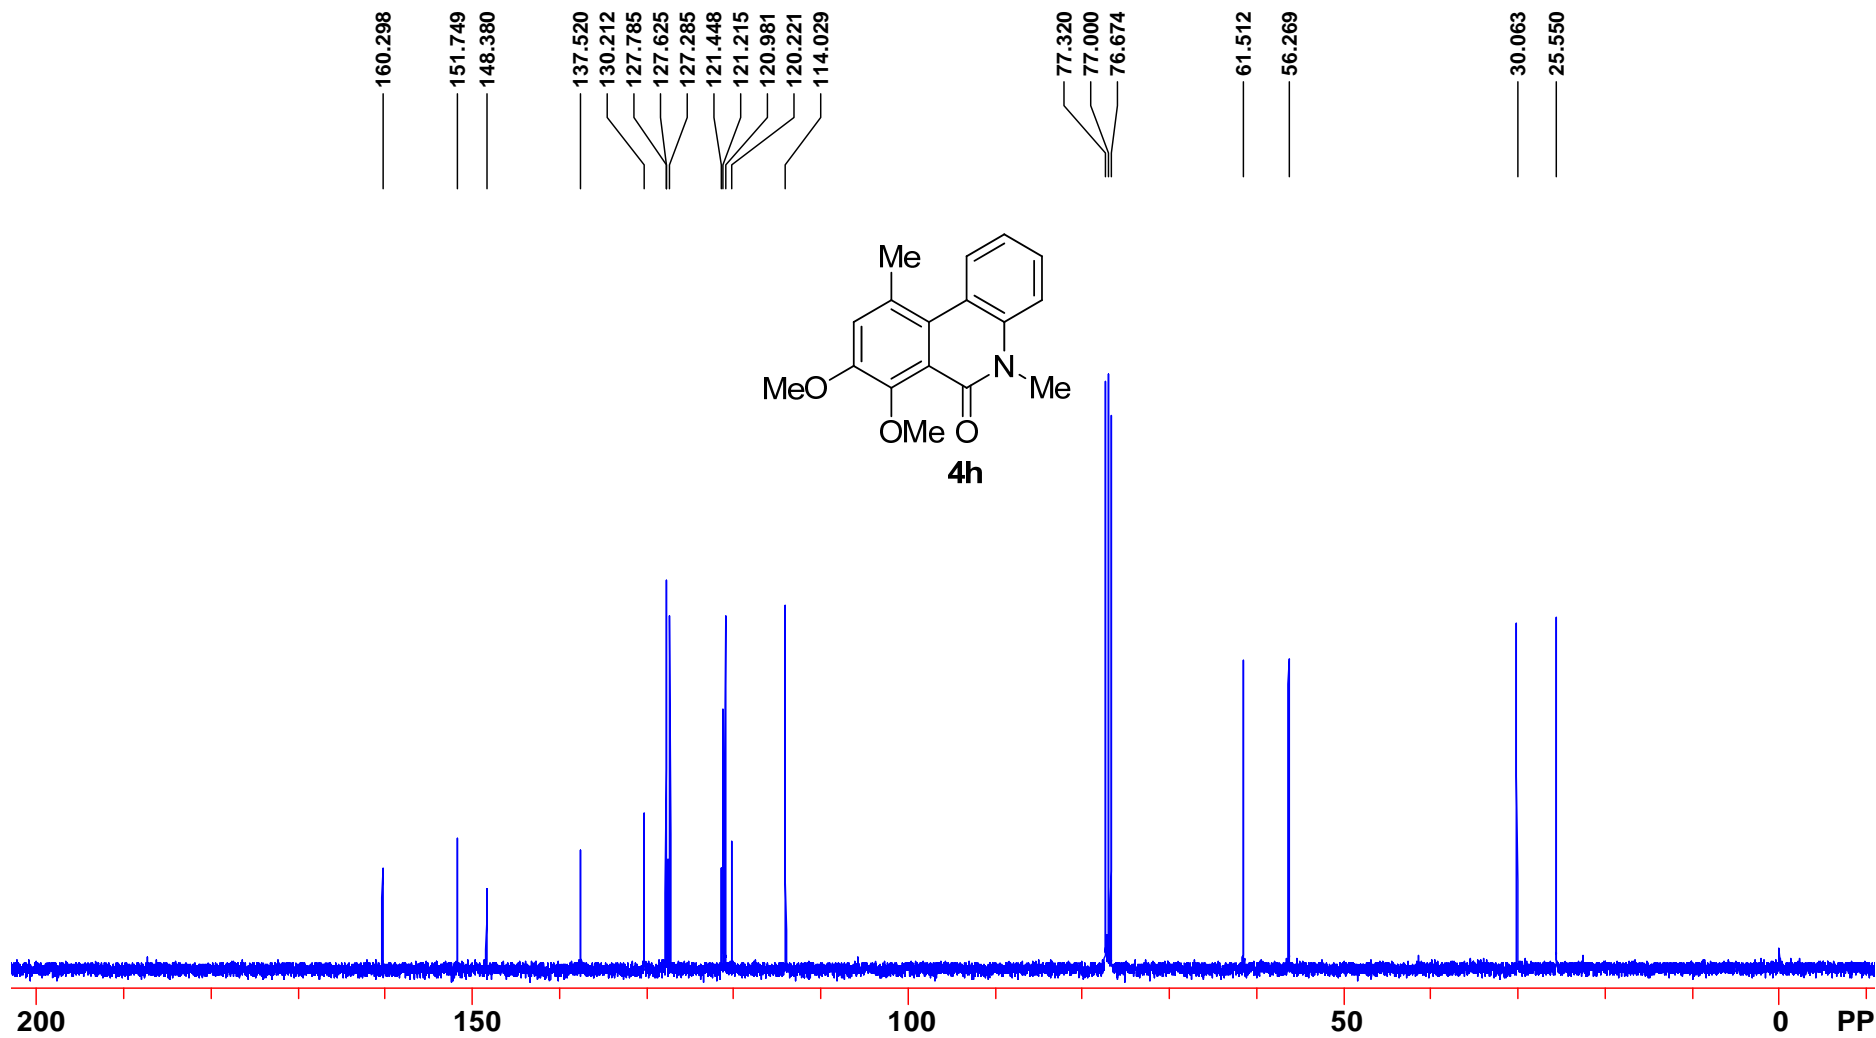

8.299  
8.278  
8.117  
8.110  
8.095  
8.088  
7.509  
7.490  
7.472  
7.381  
7.360  
7.279  
7.261  
7.243  
7.240

3.727

2.867

0.000

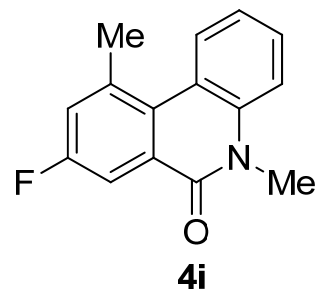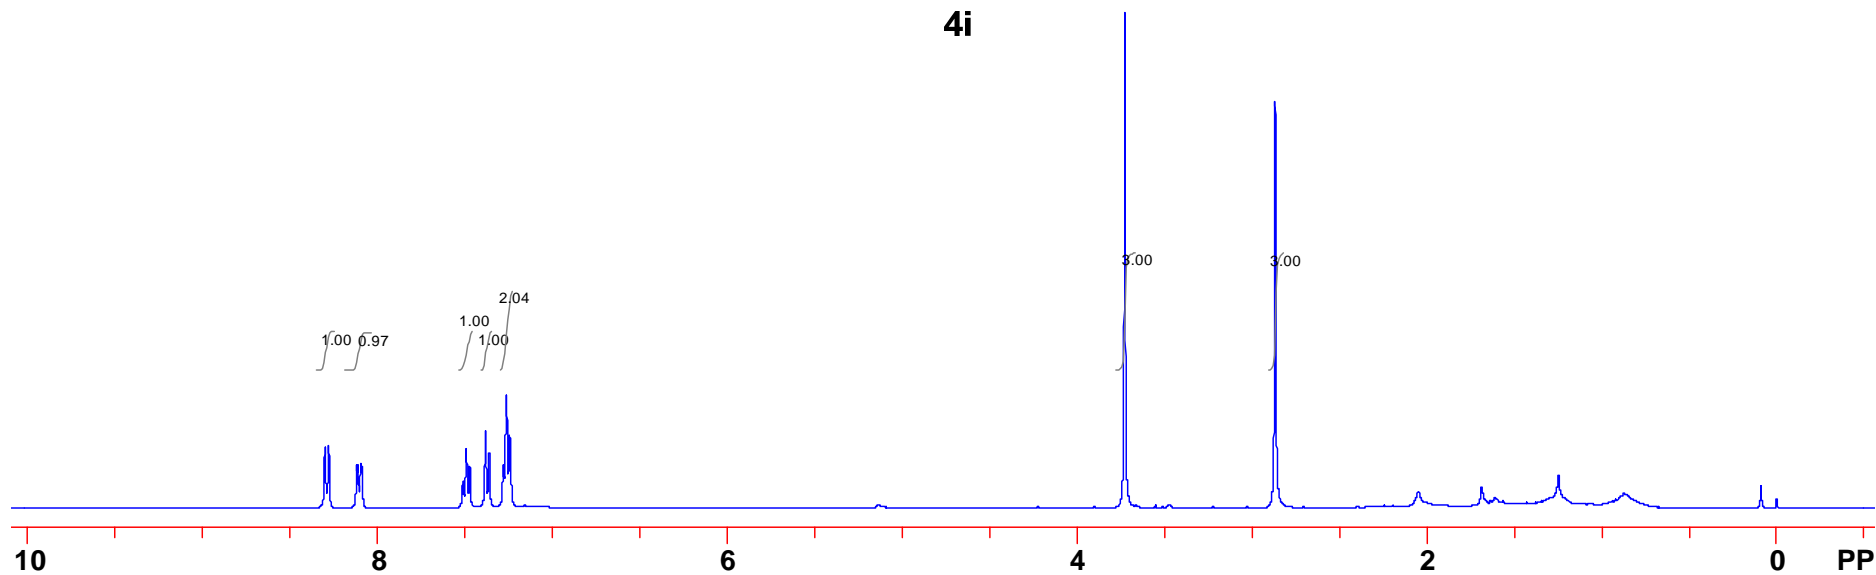

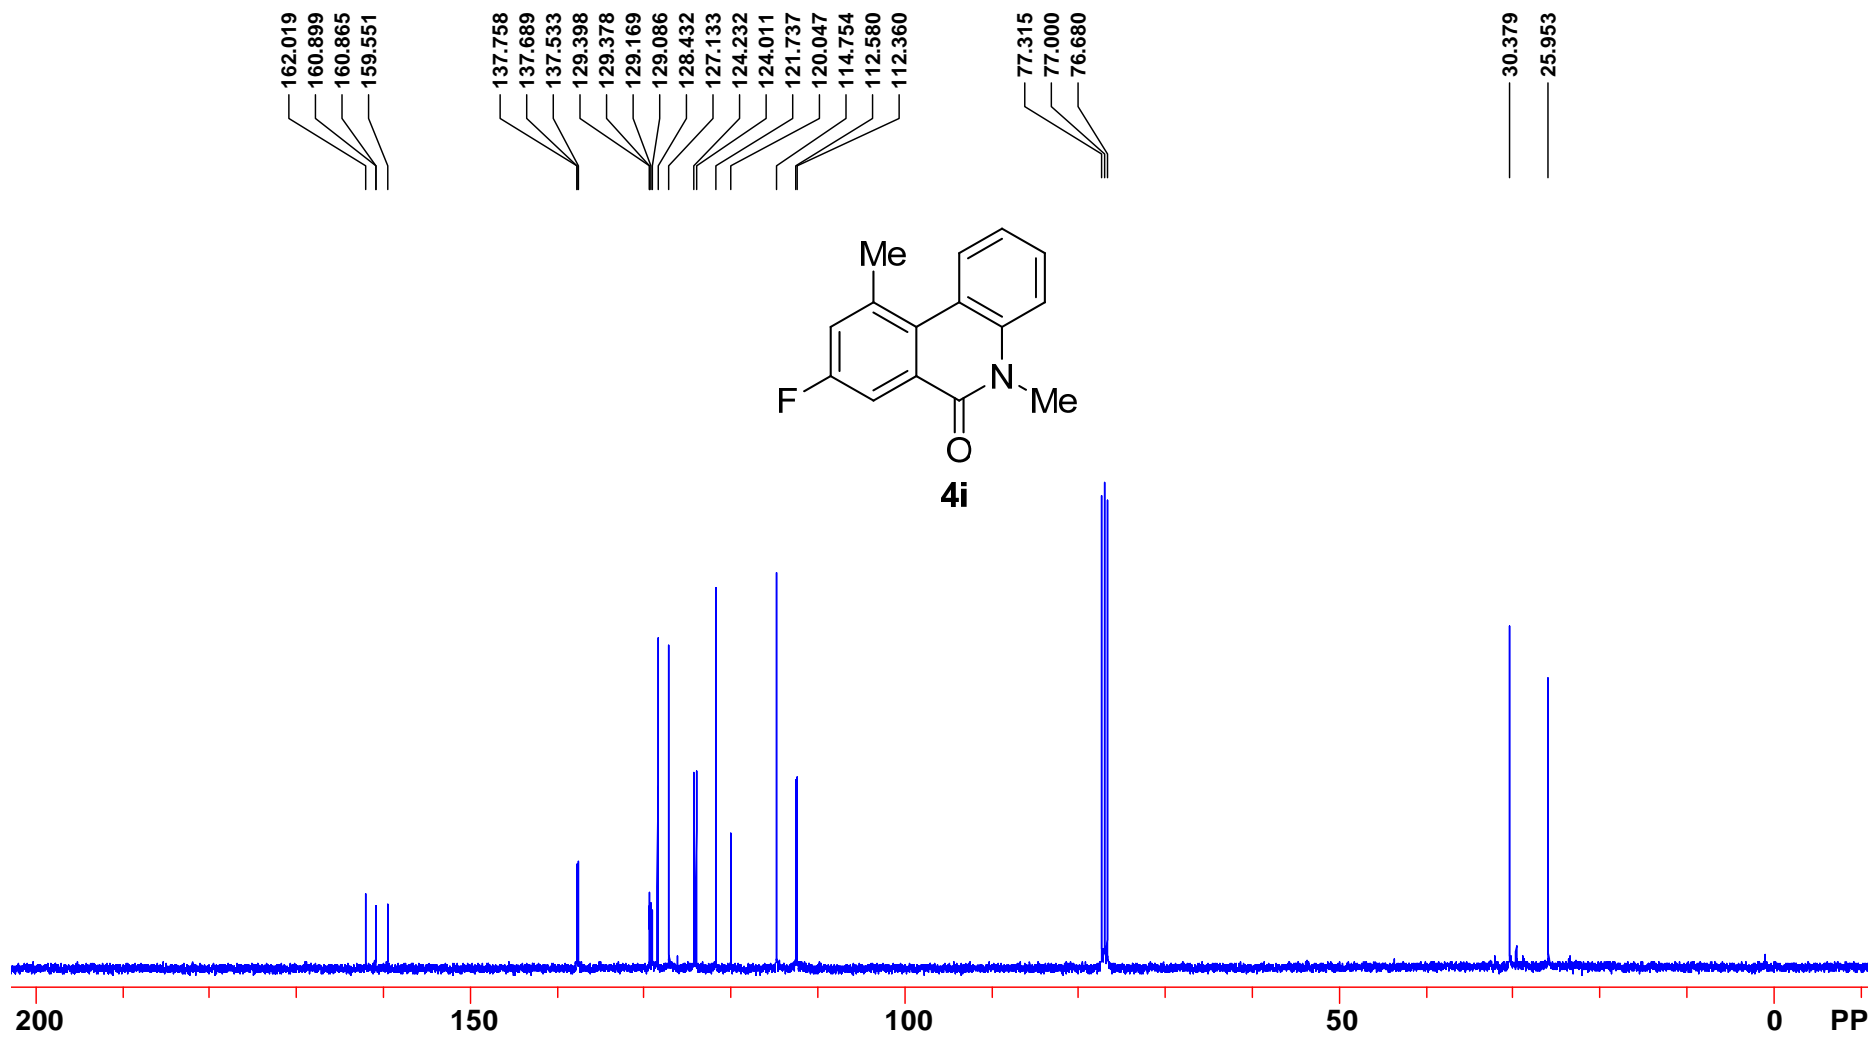

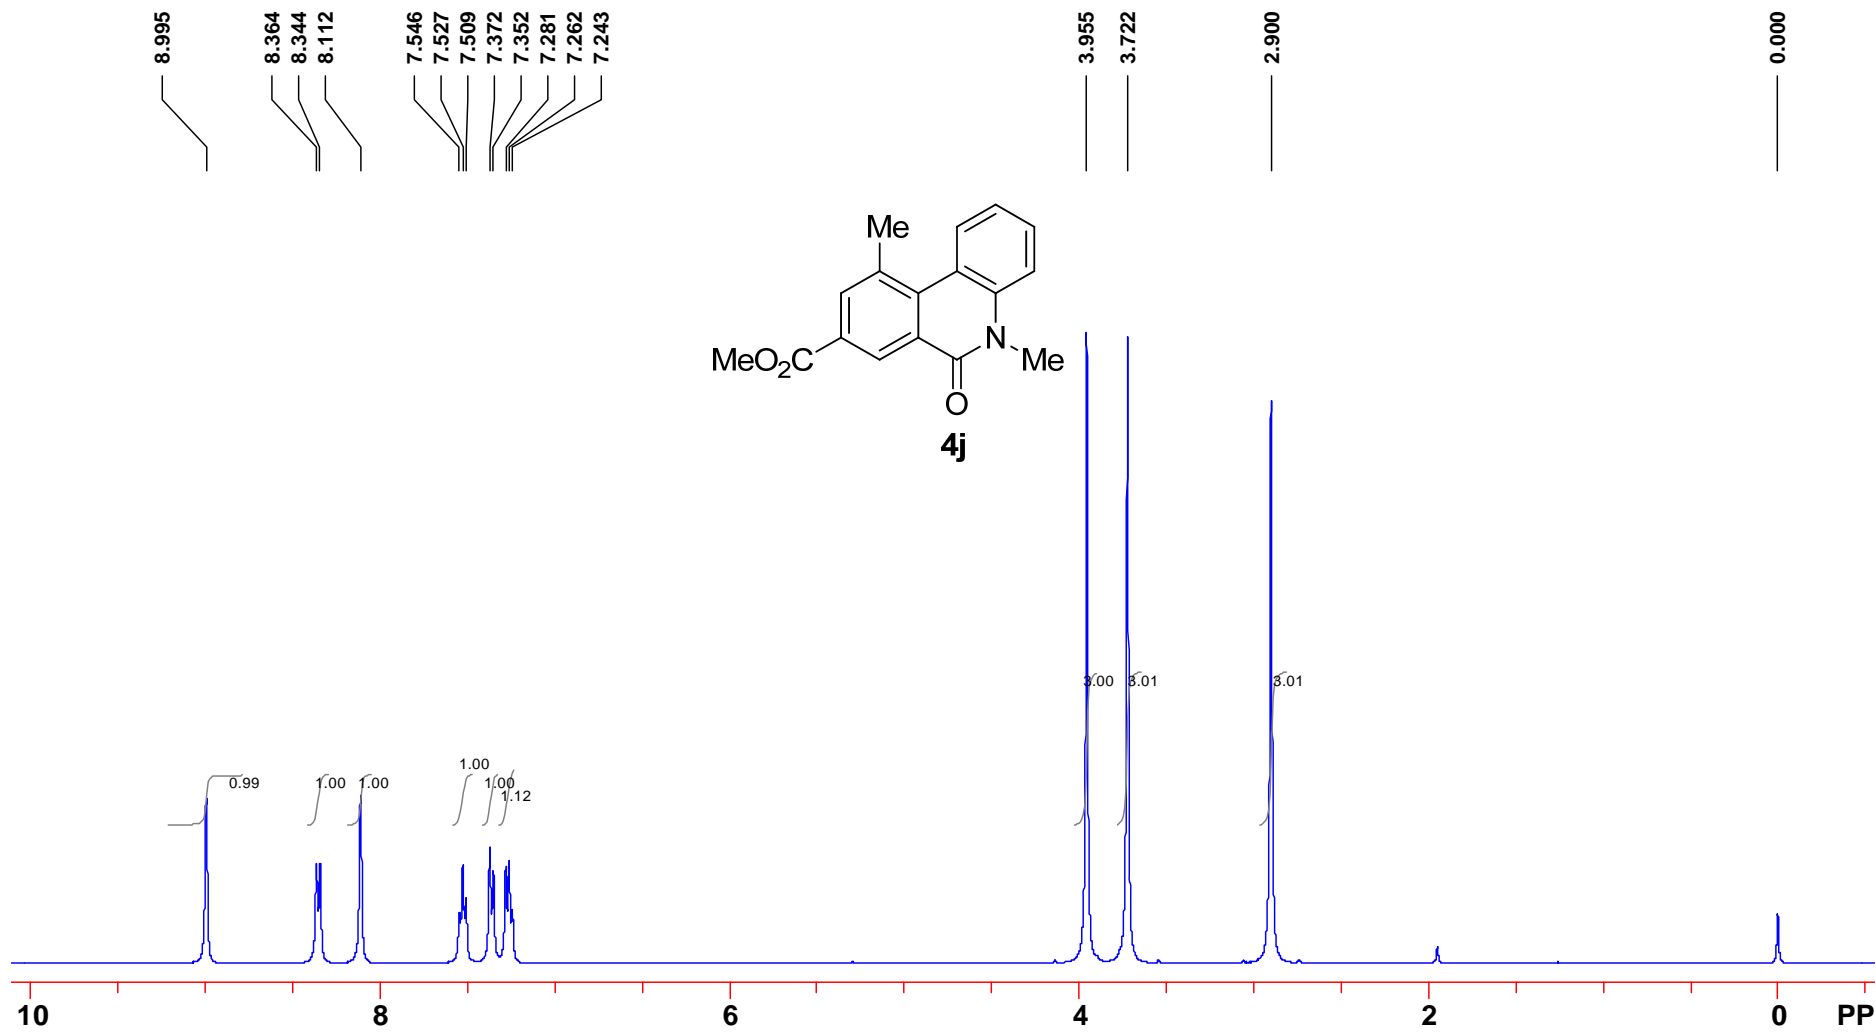

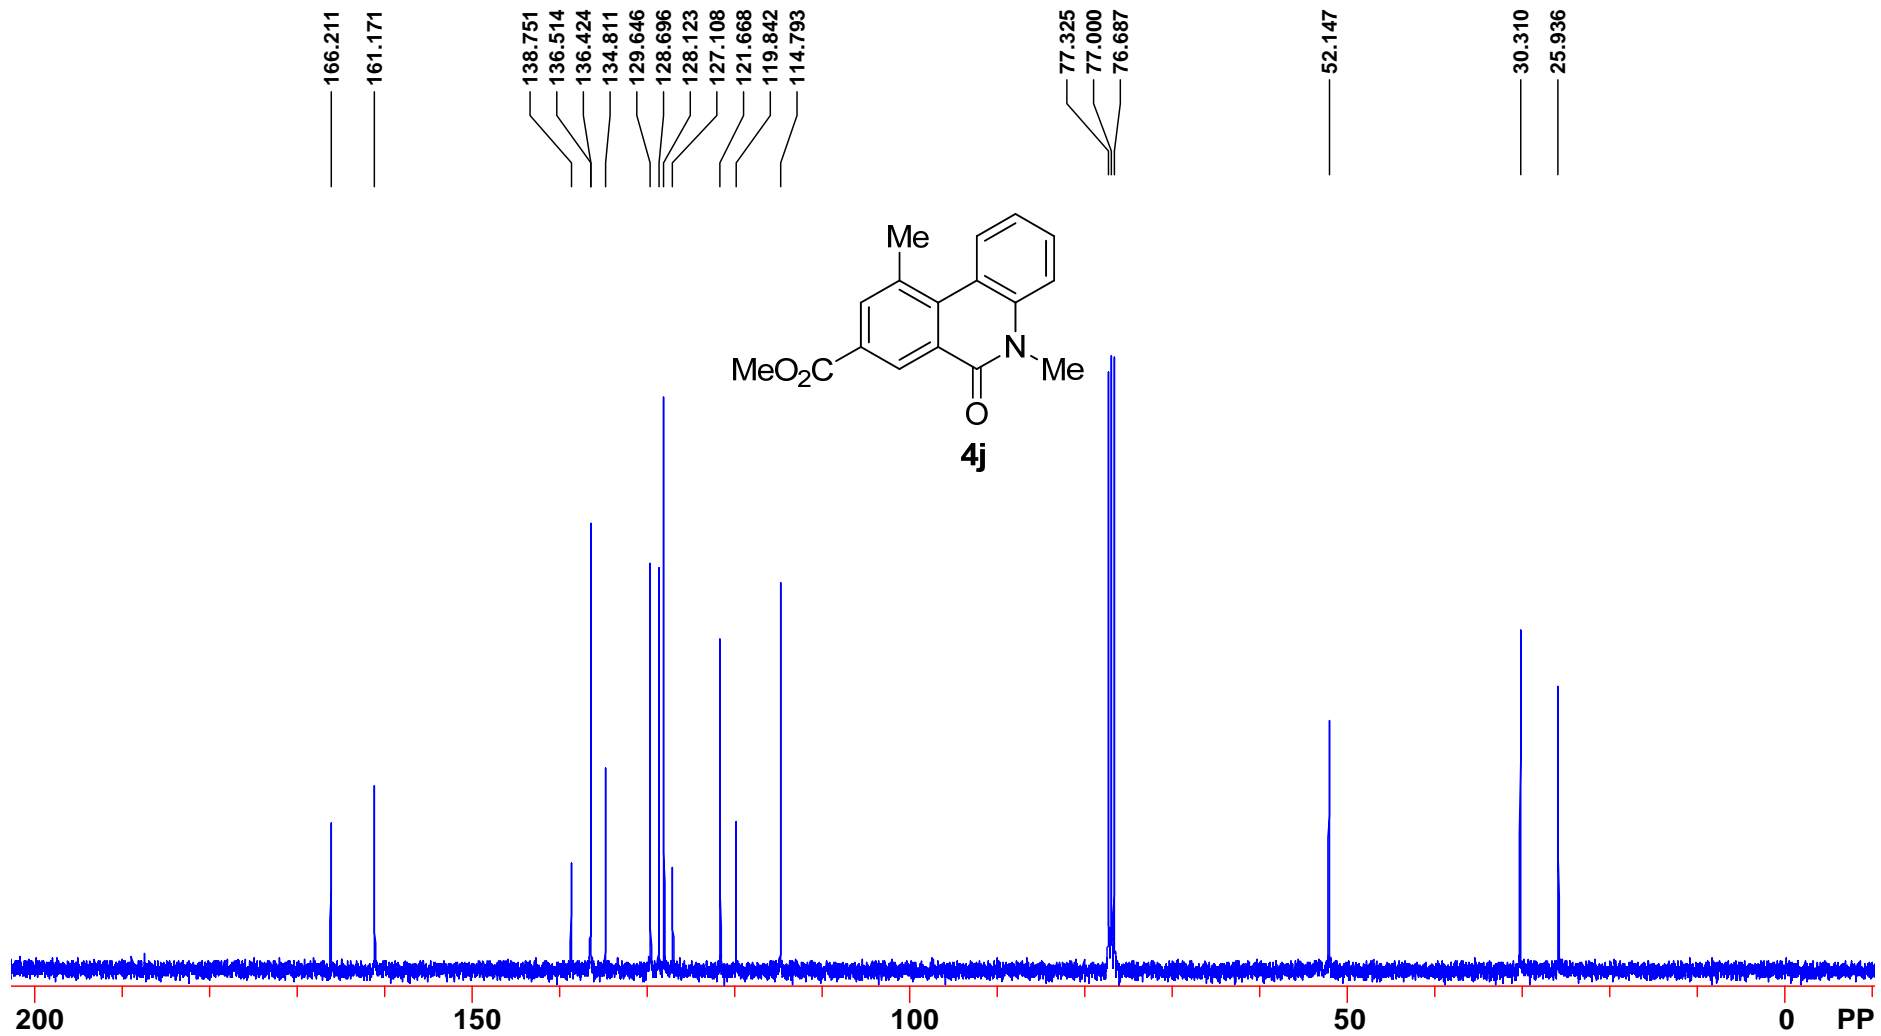

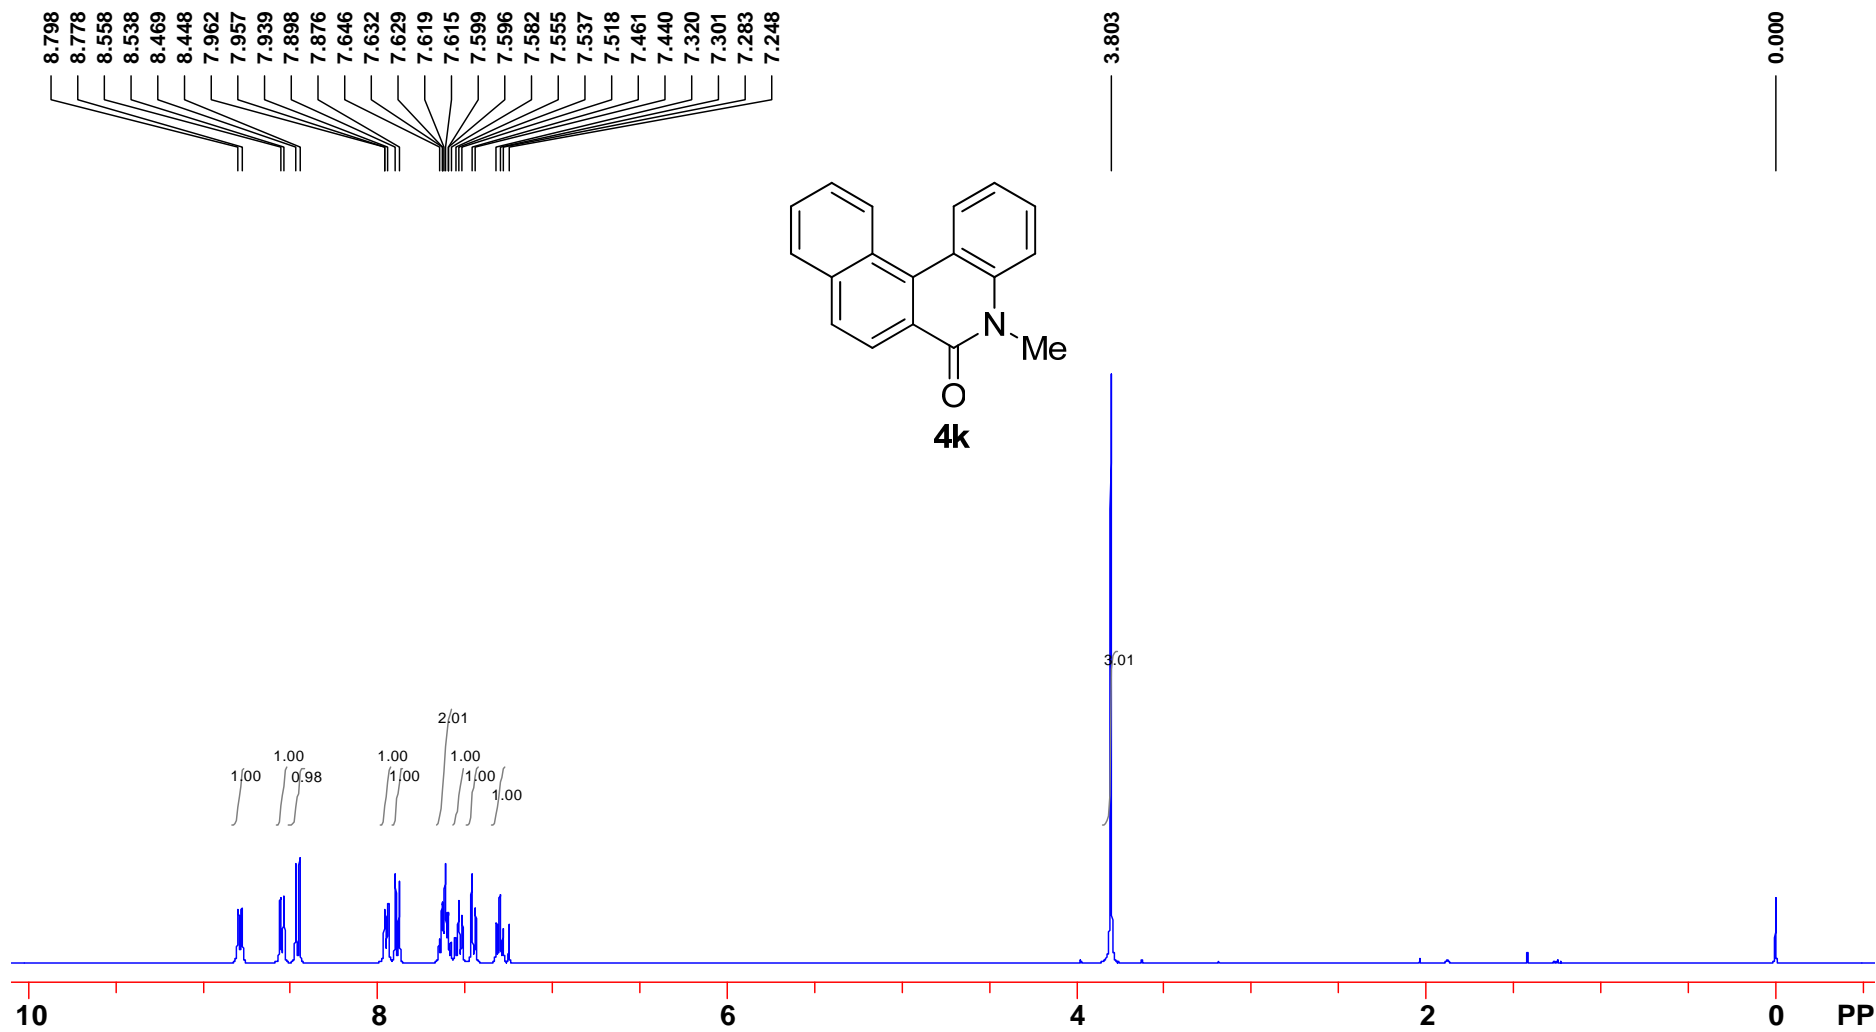

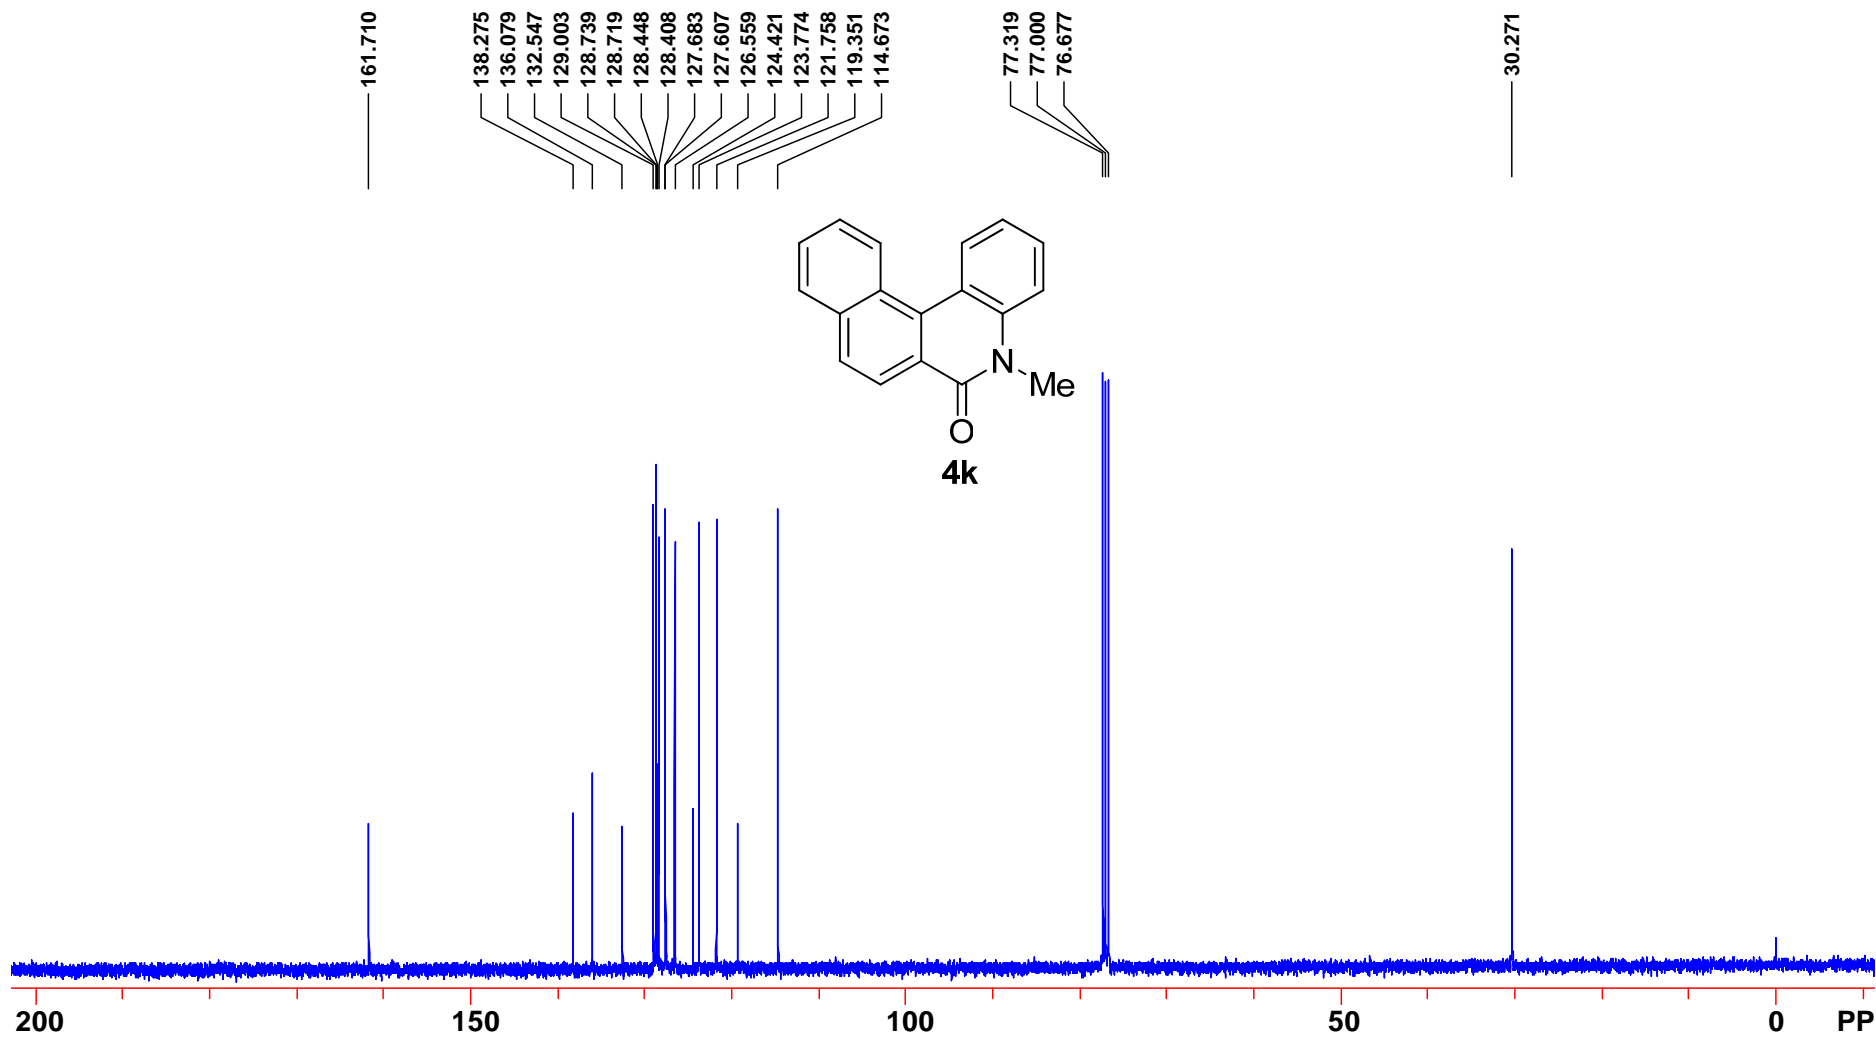

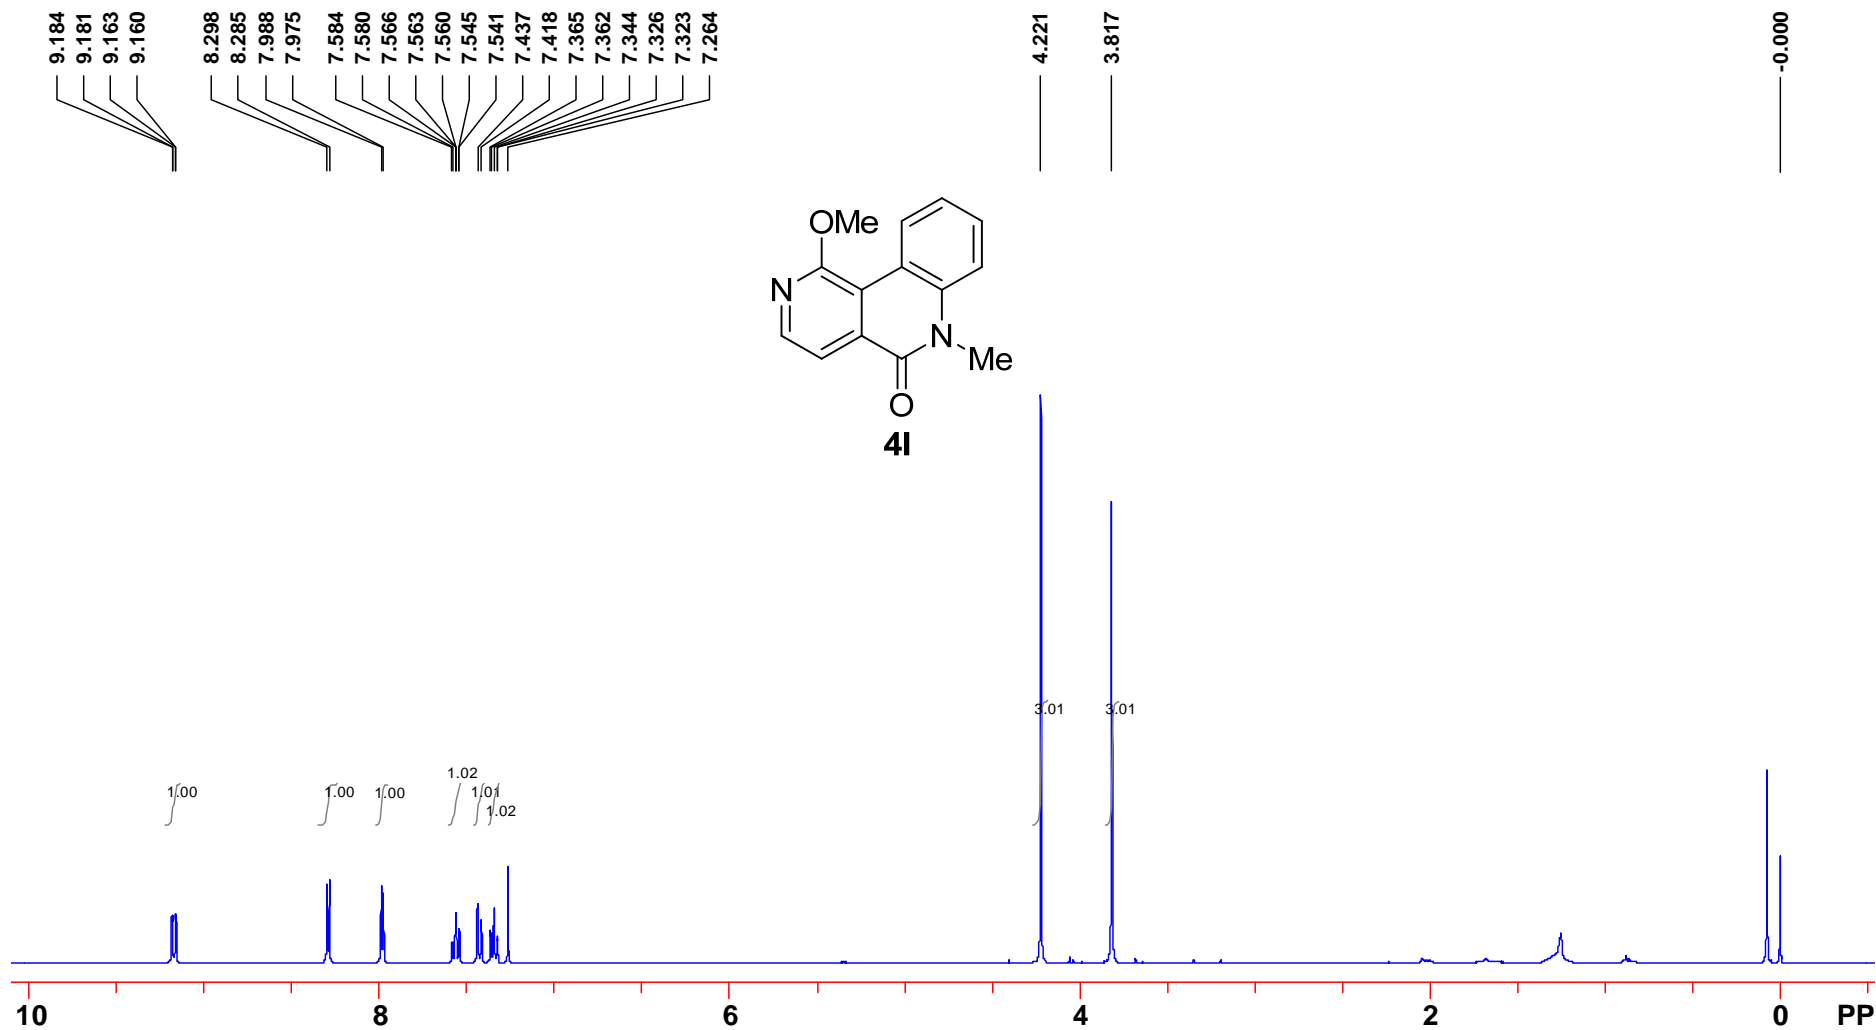



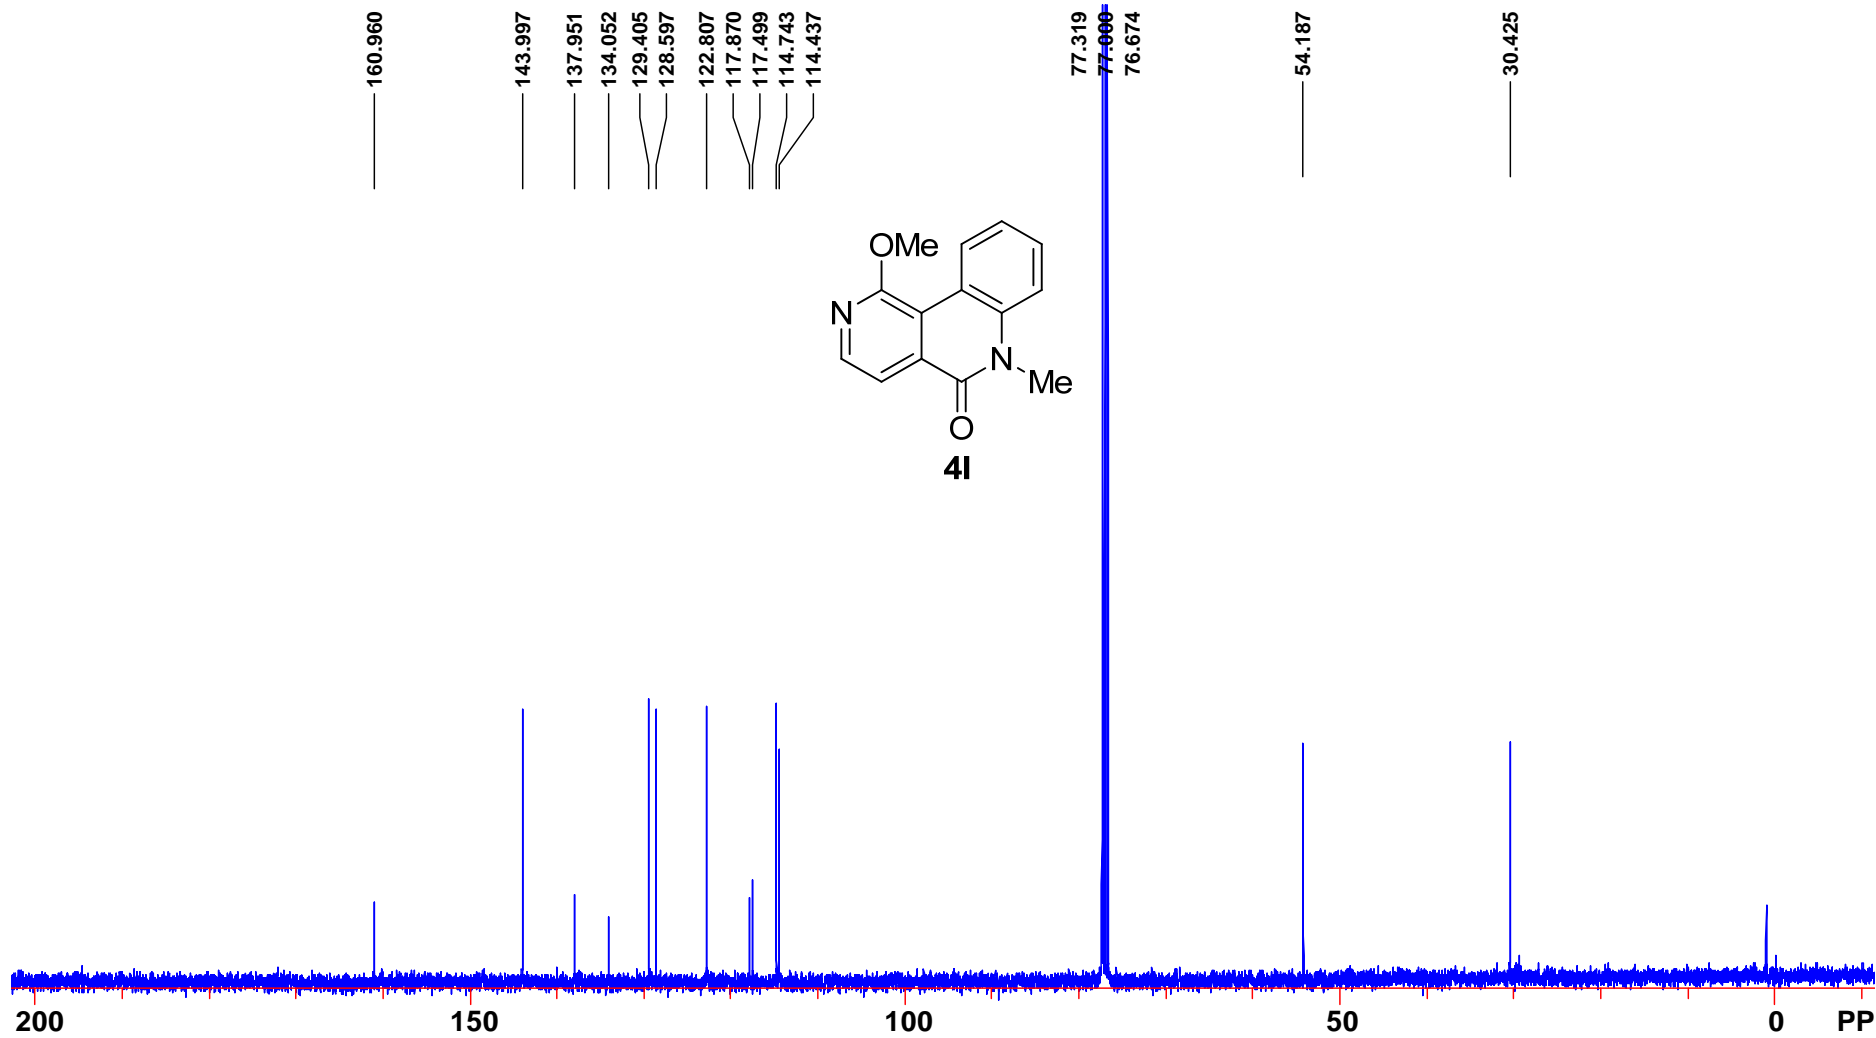

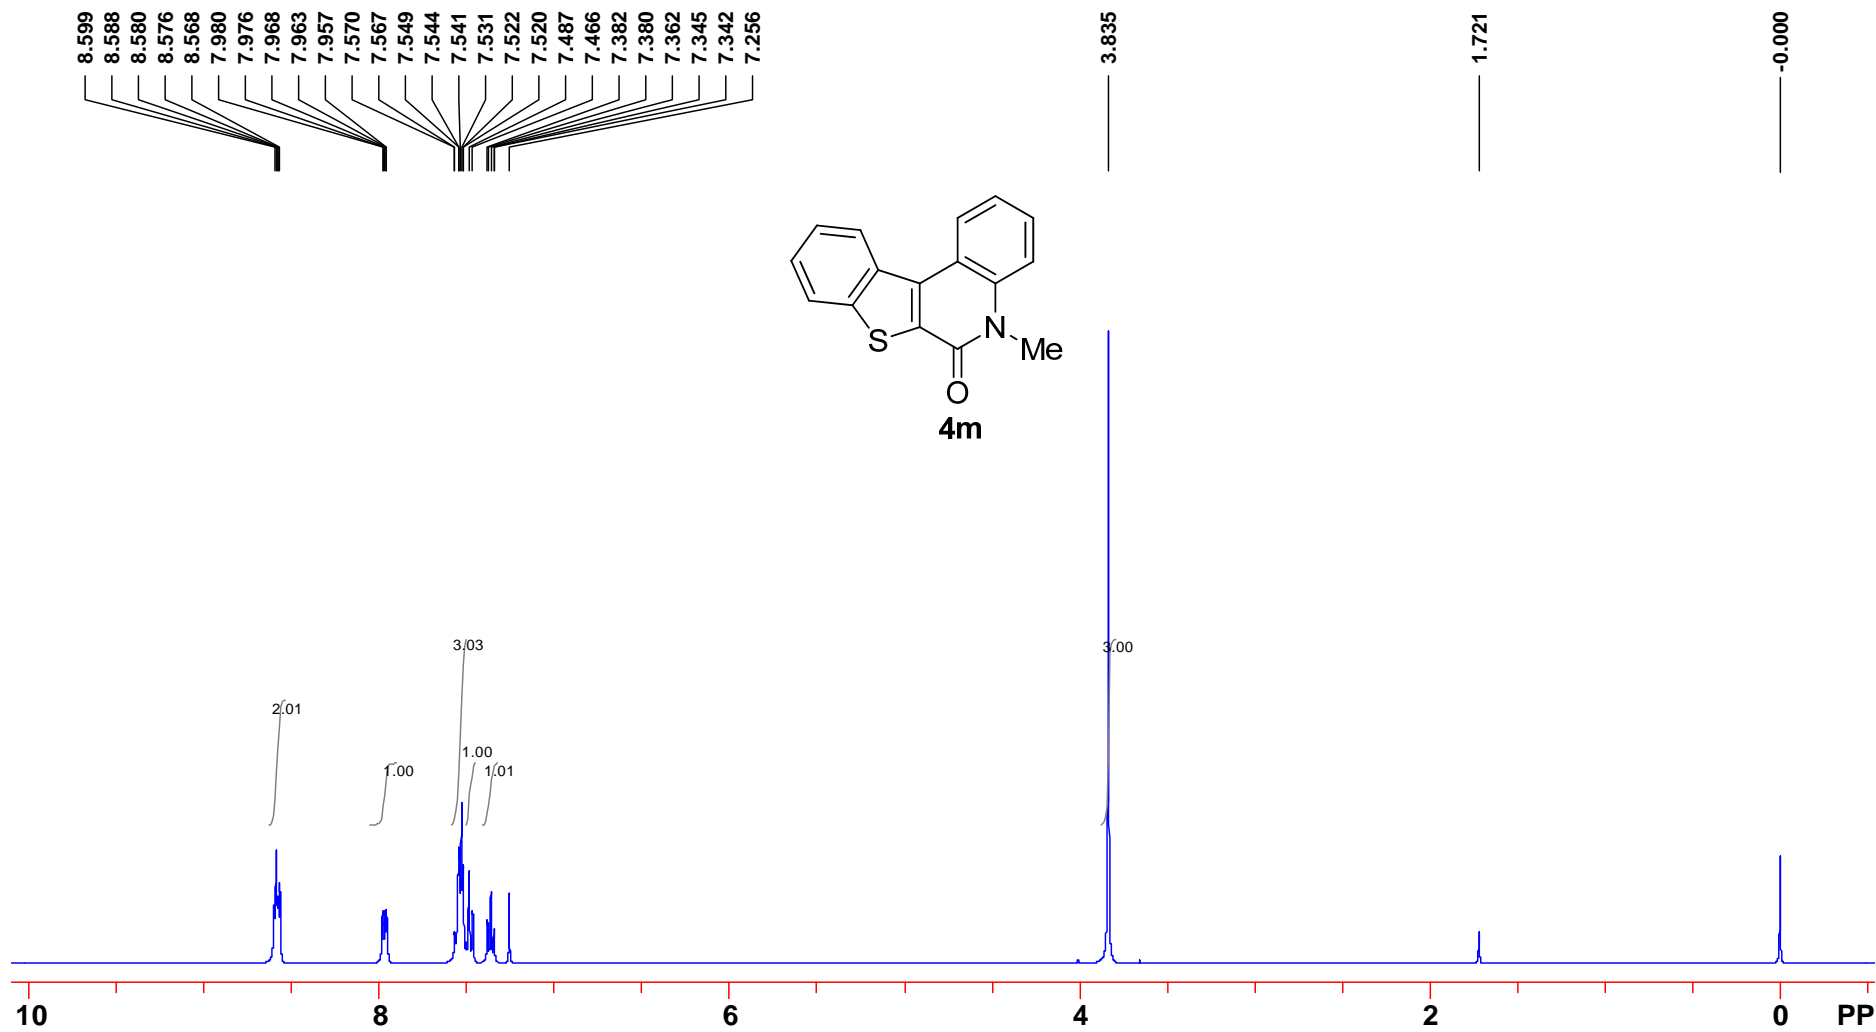

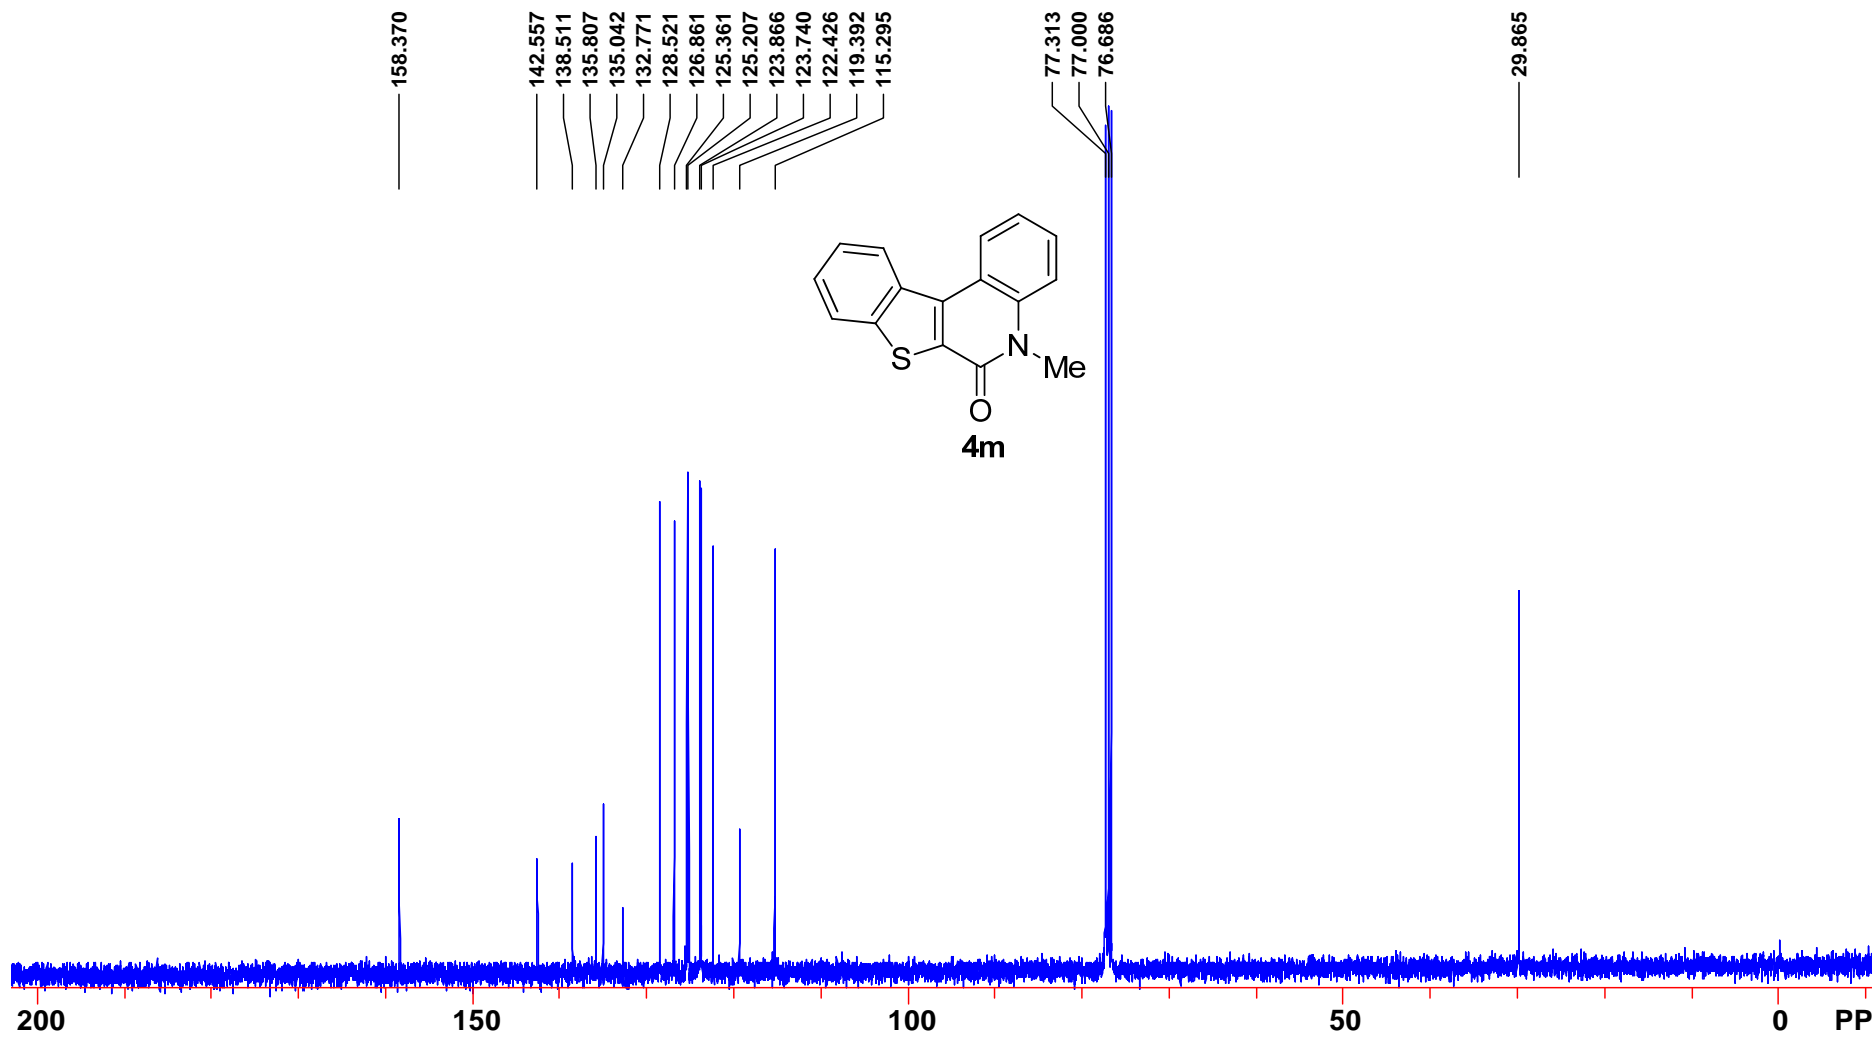

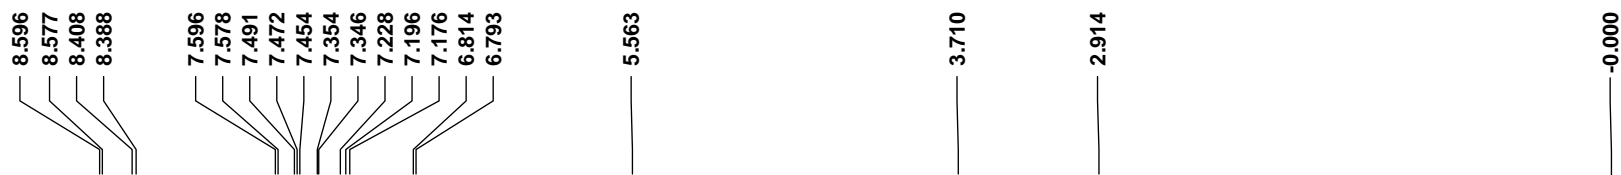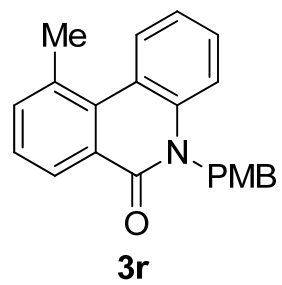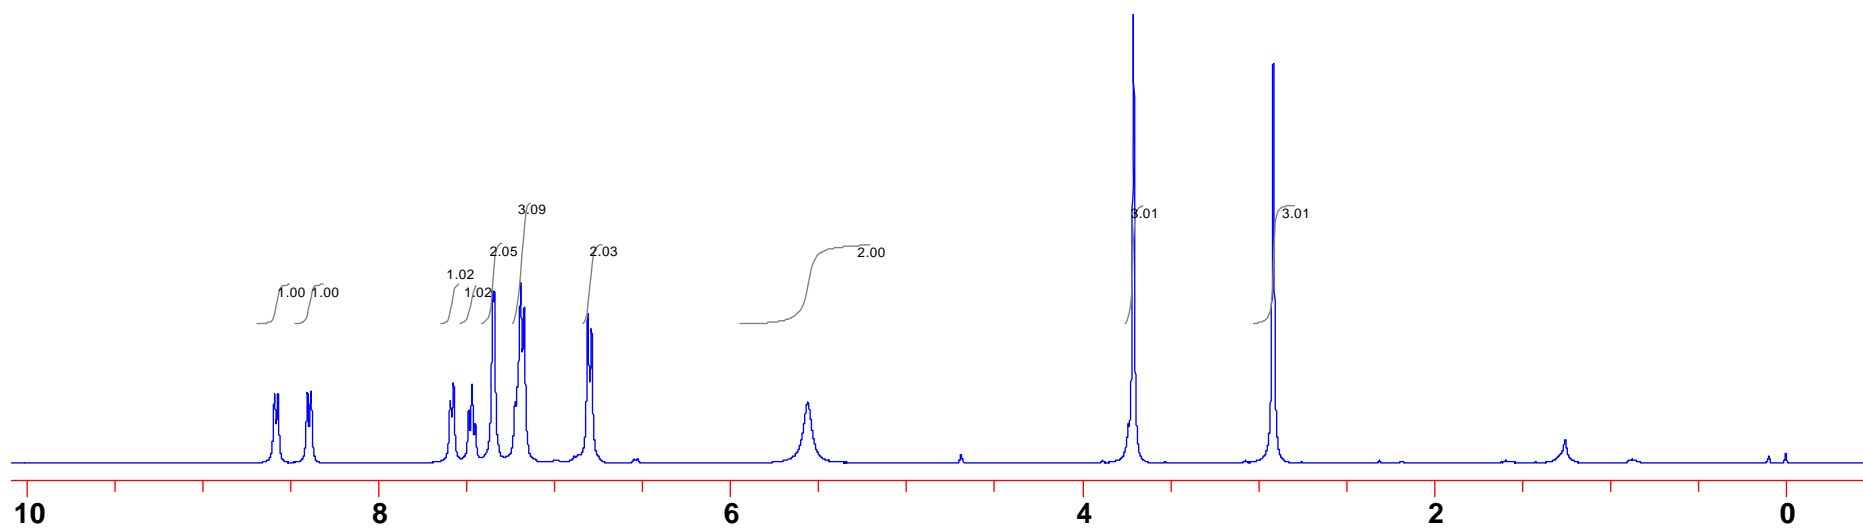

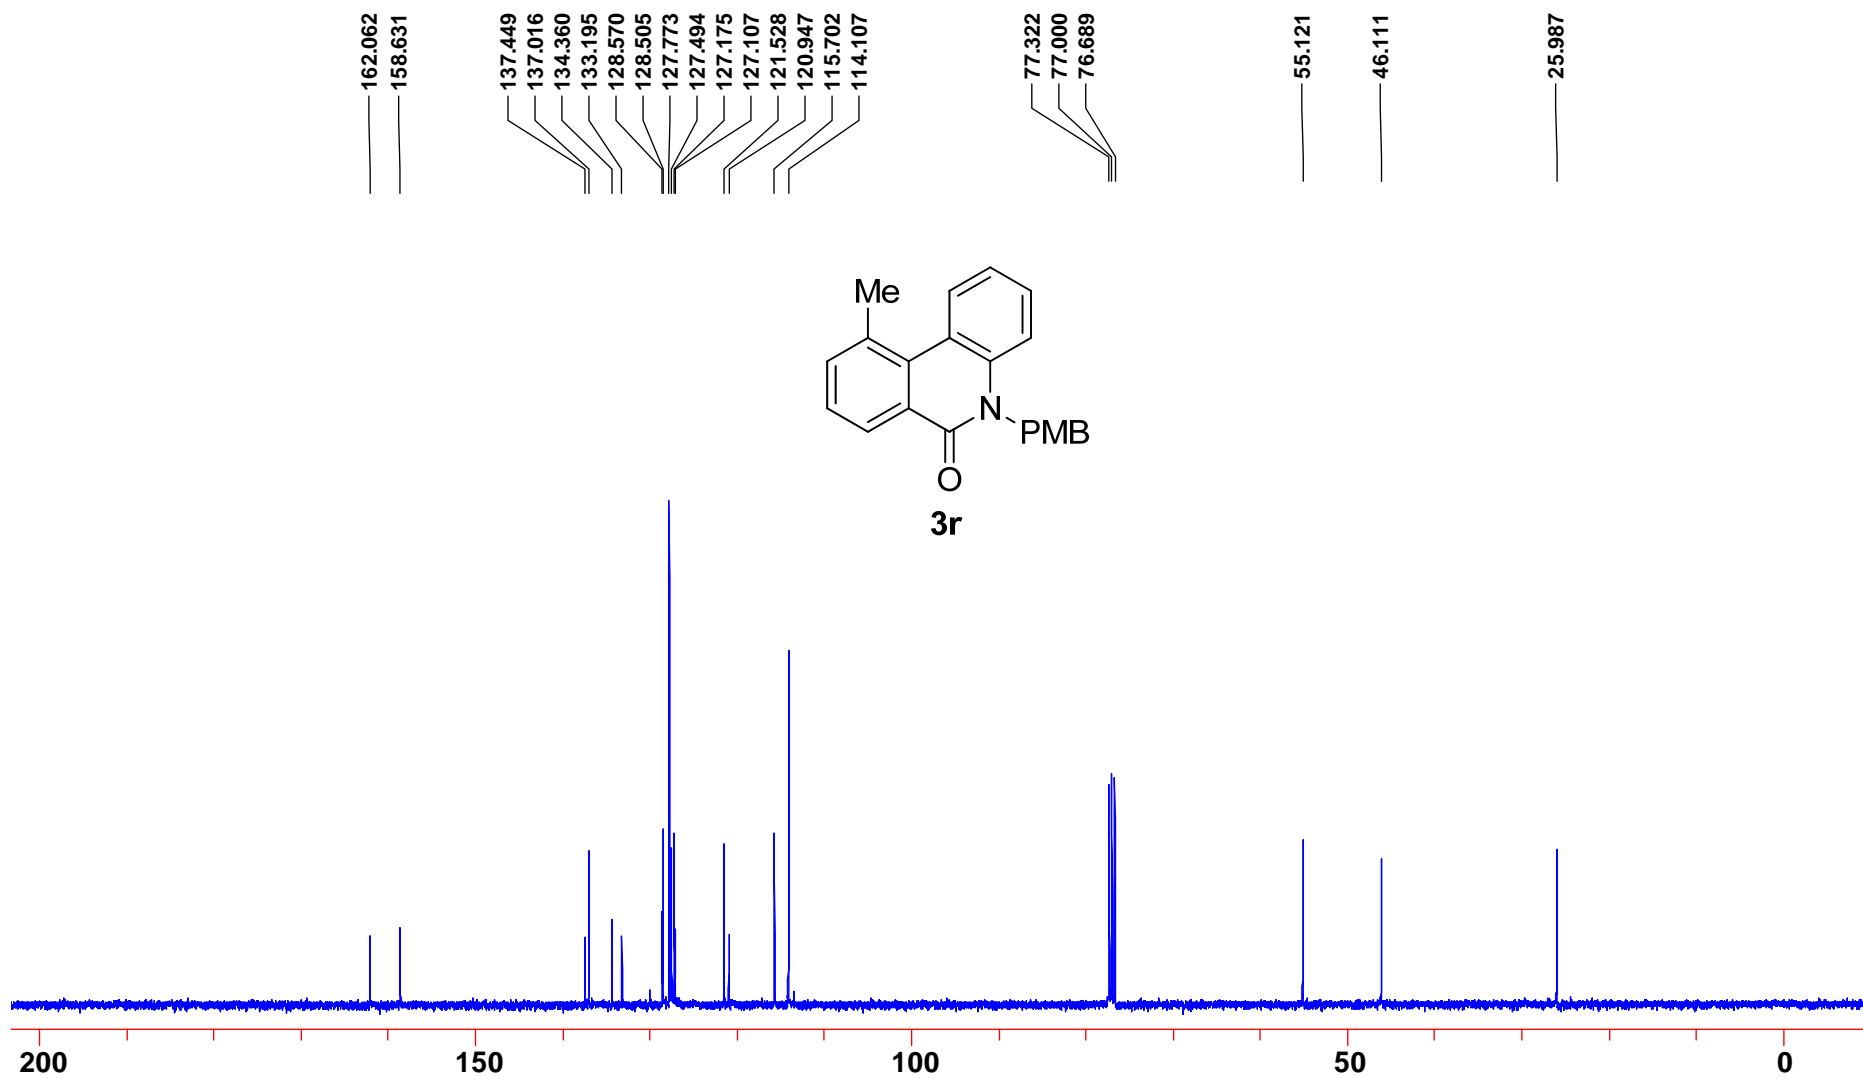

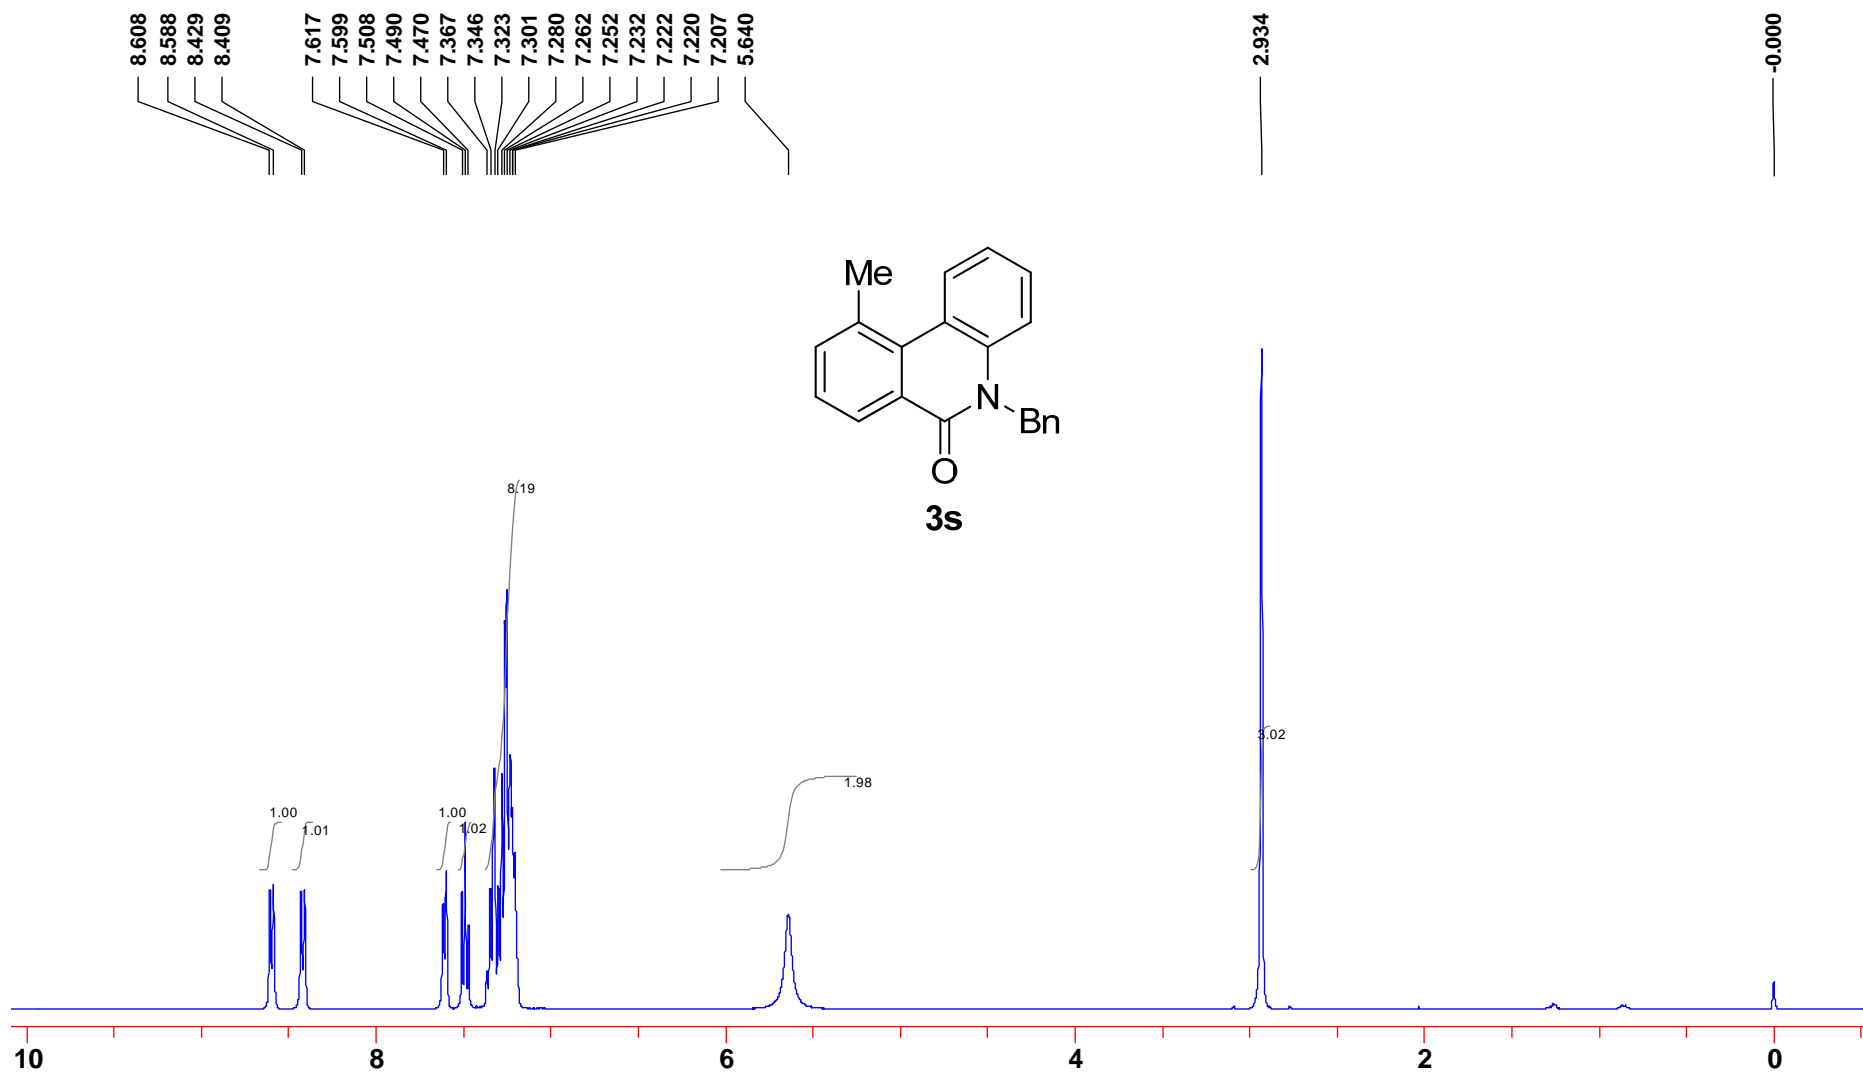

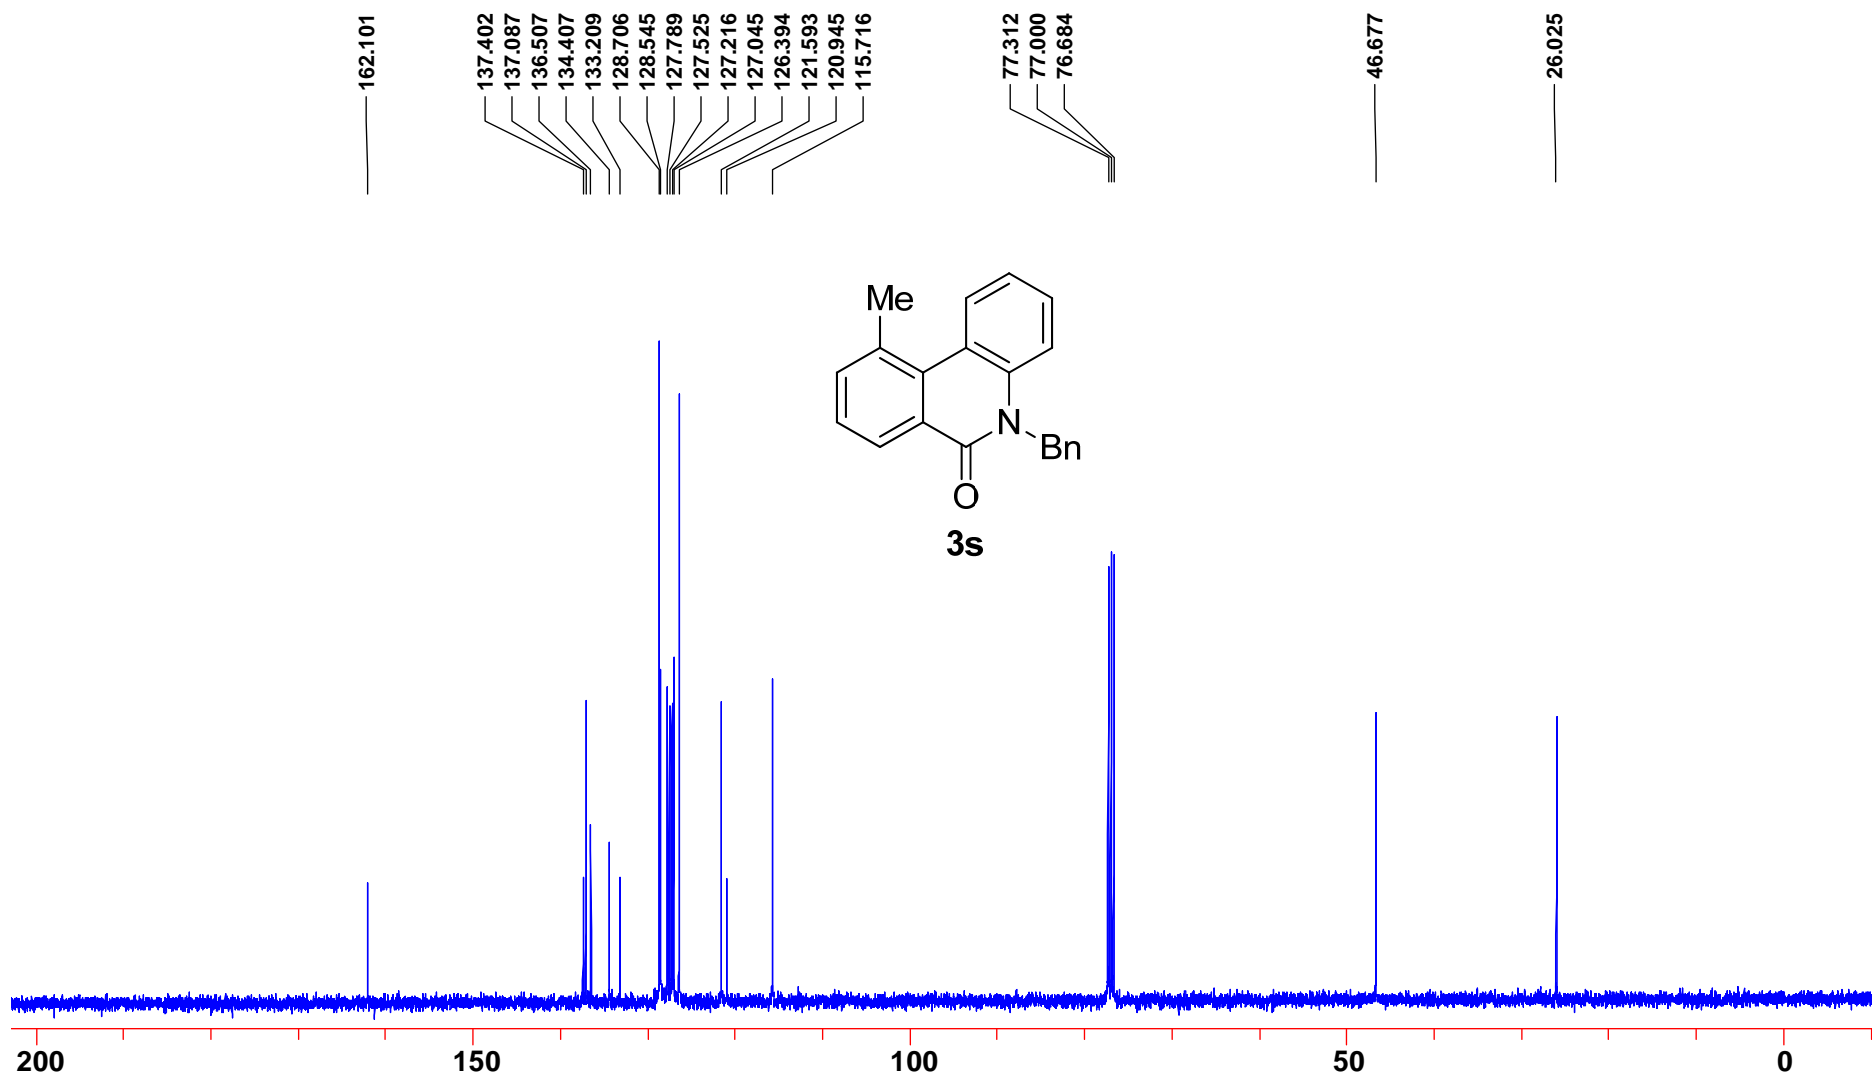

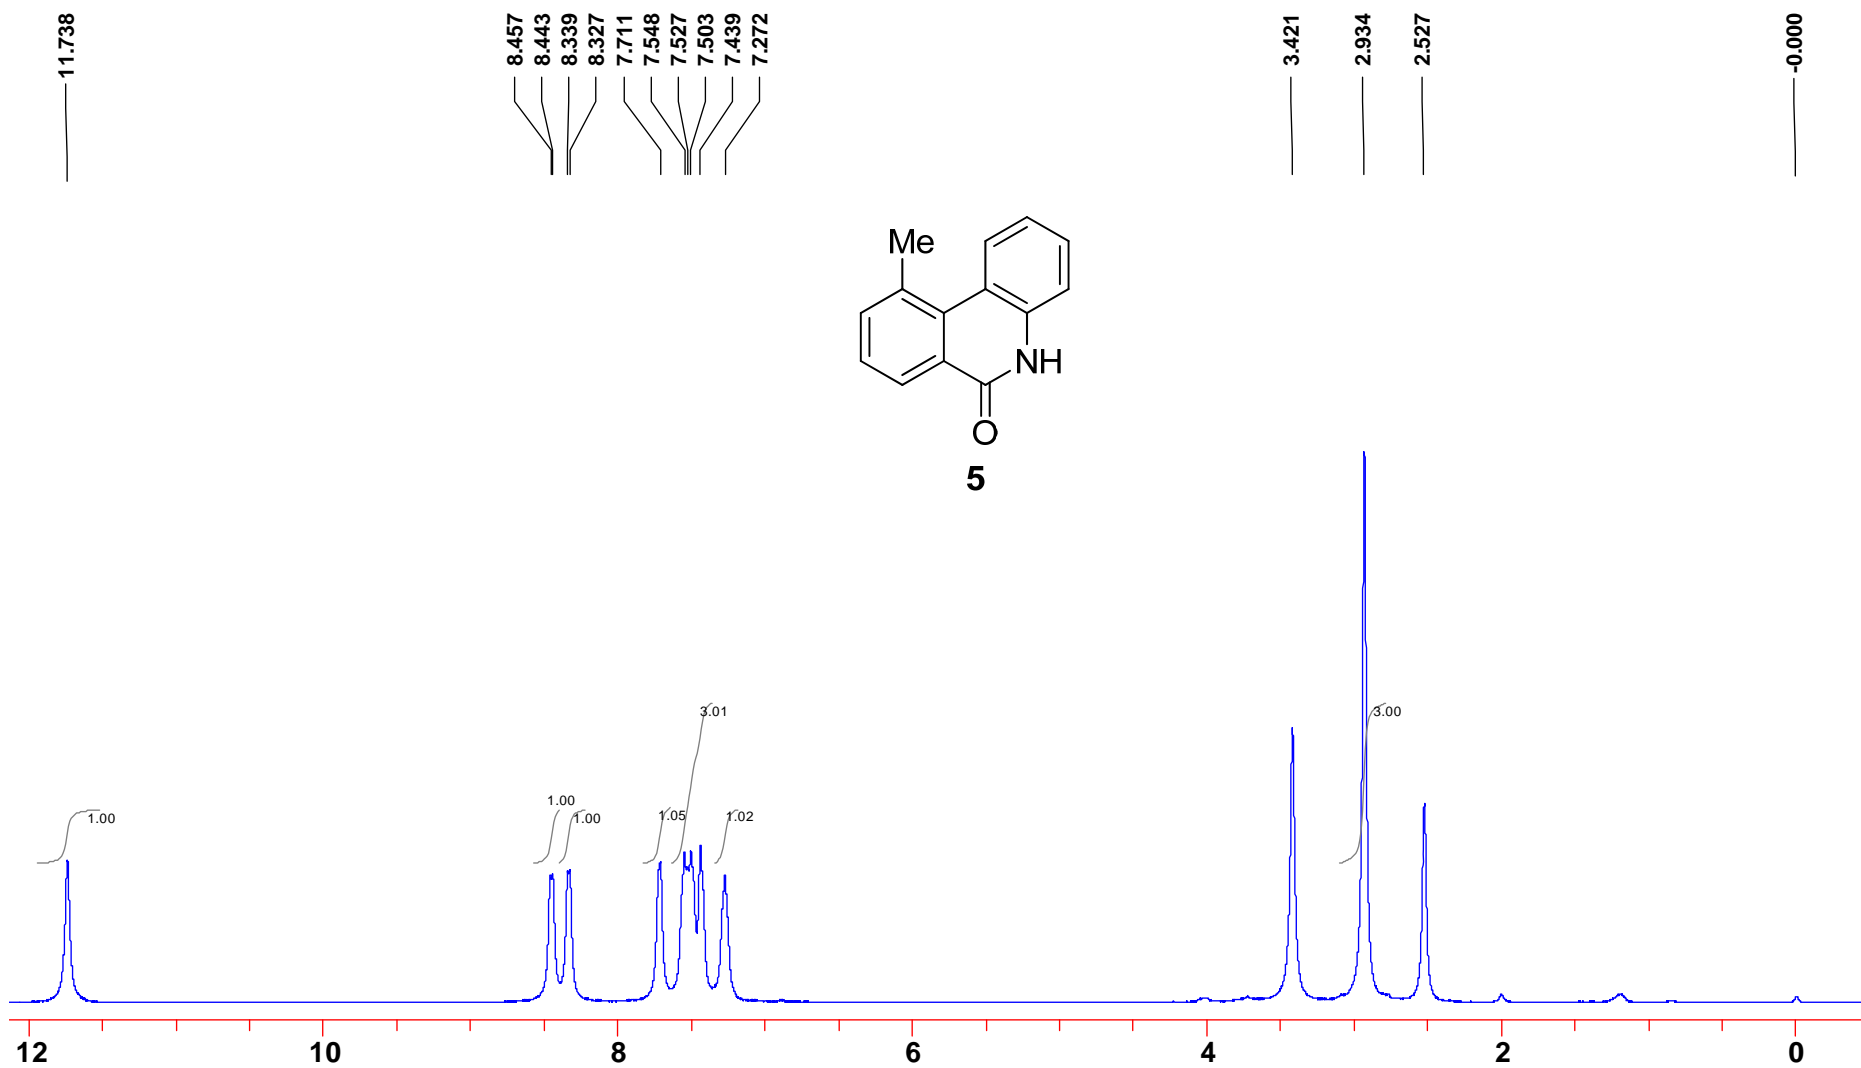



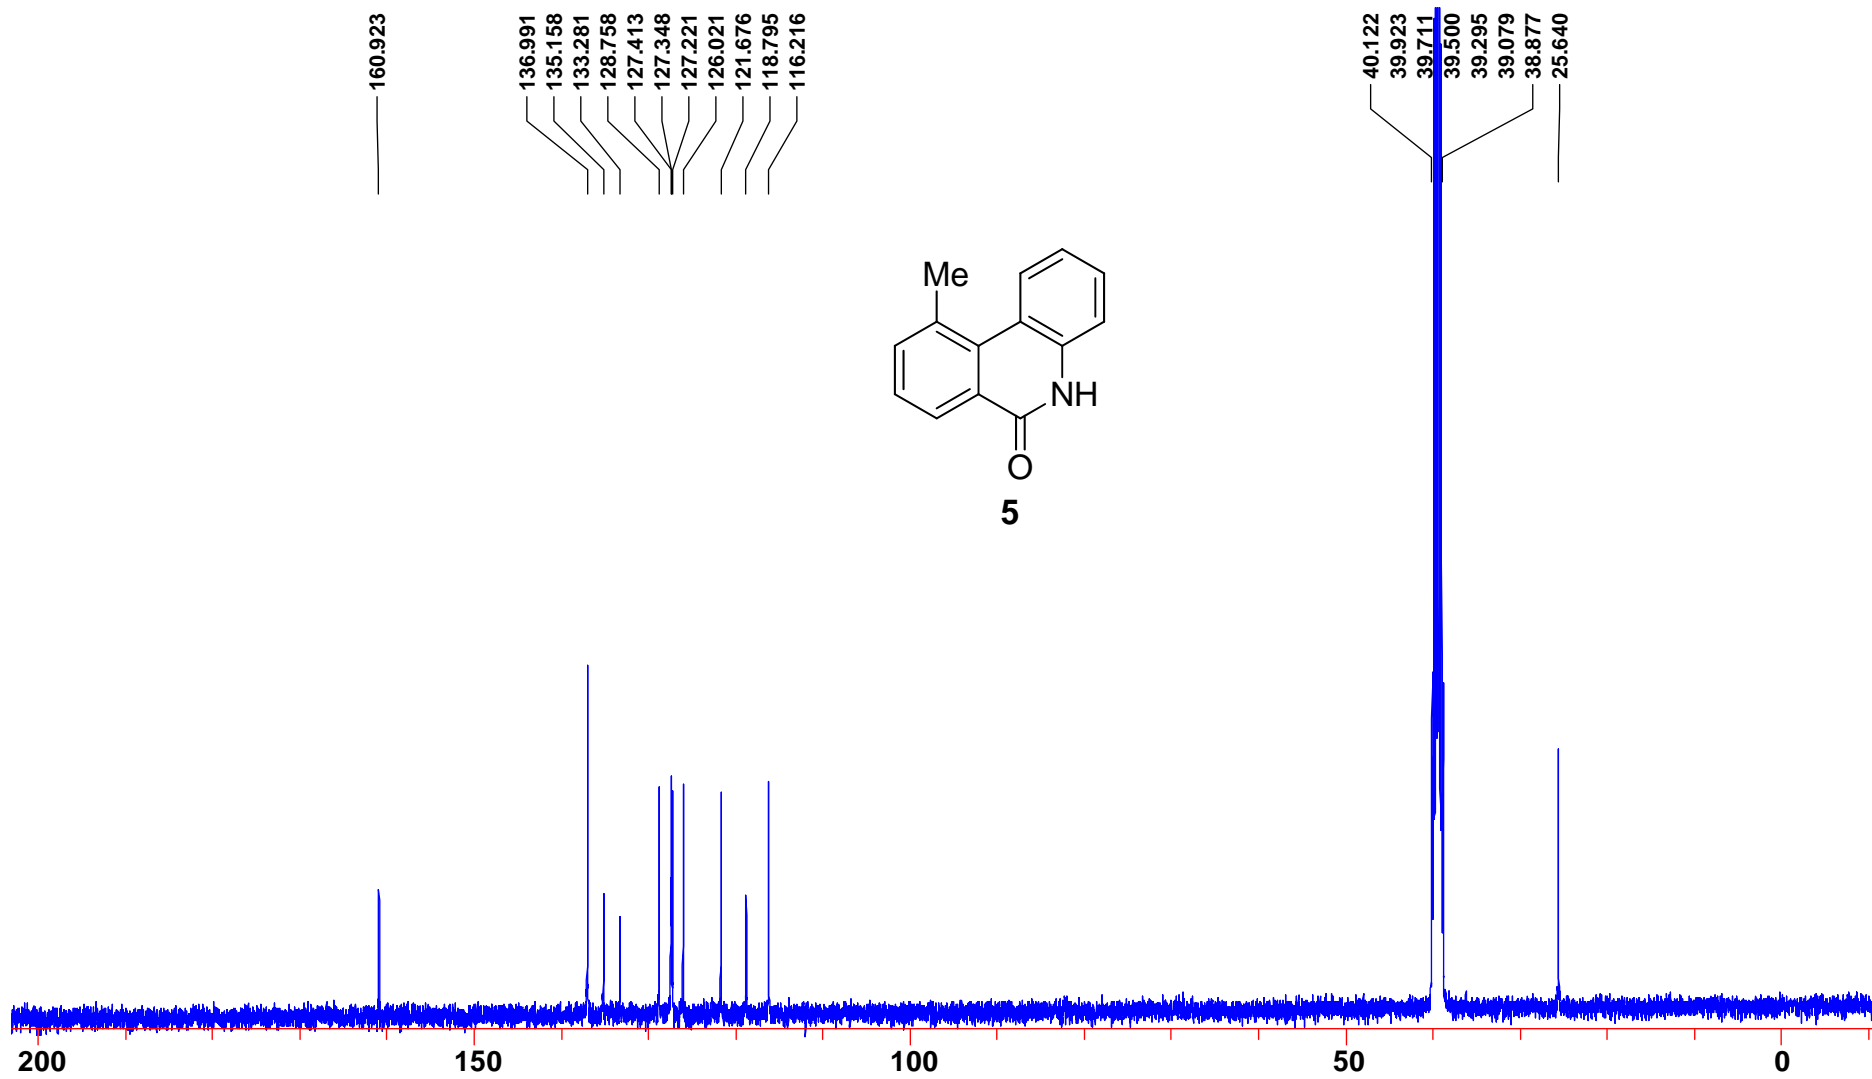

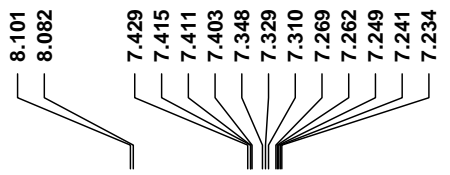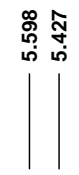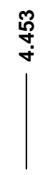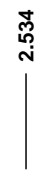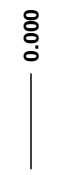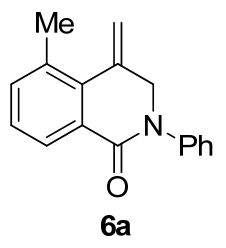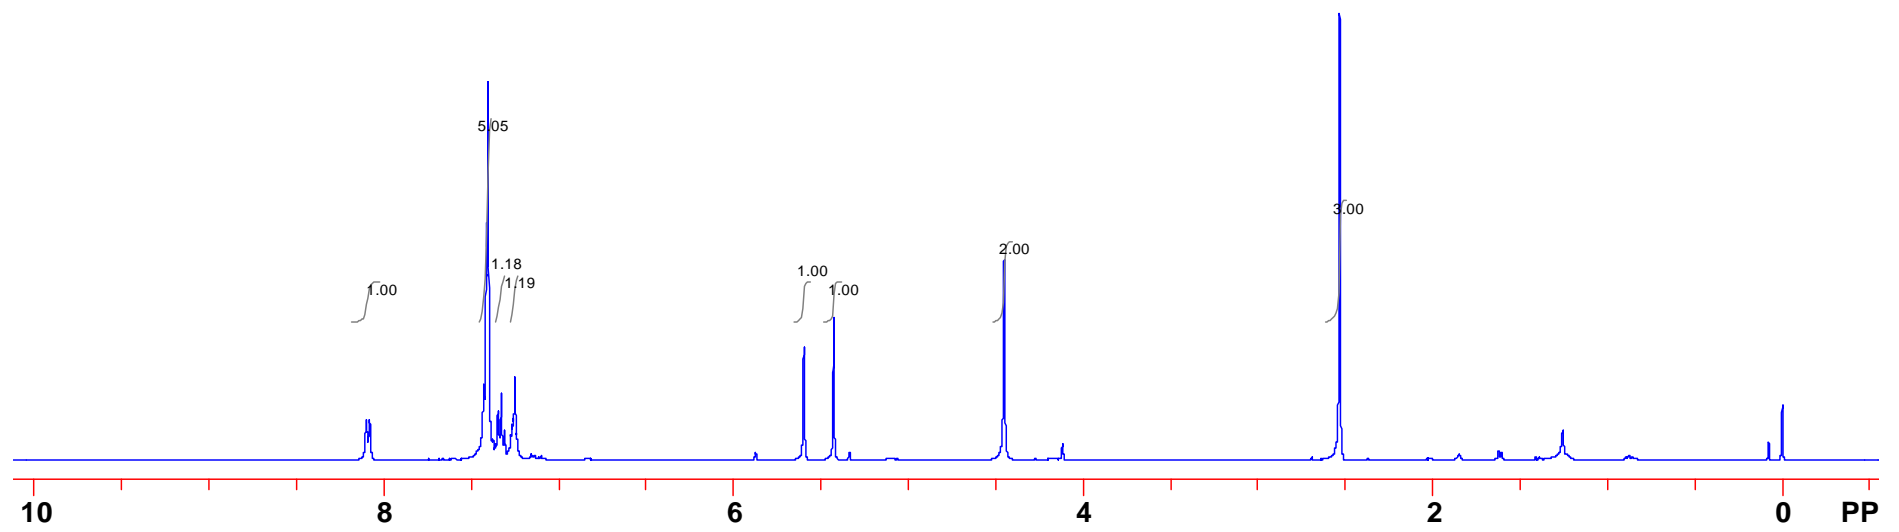

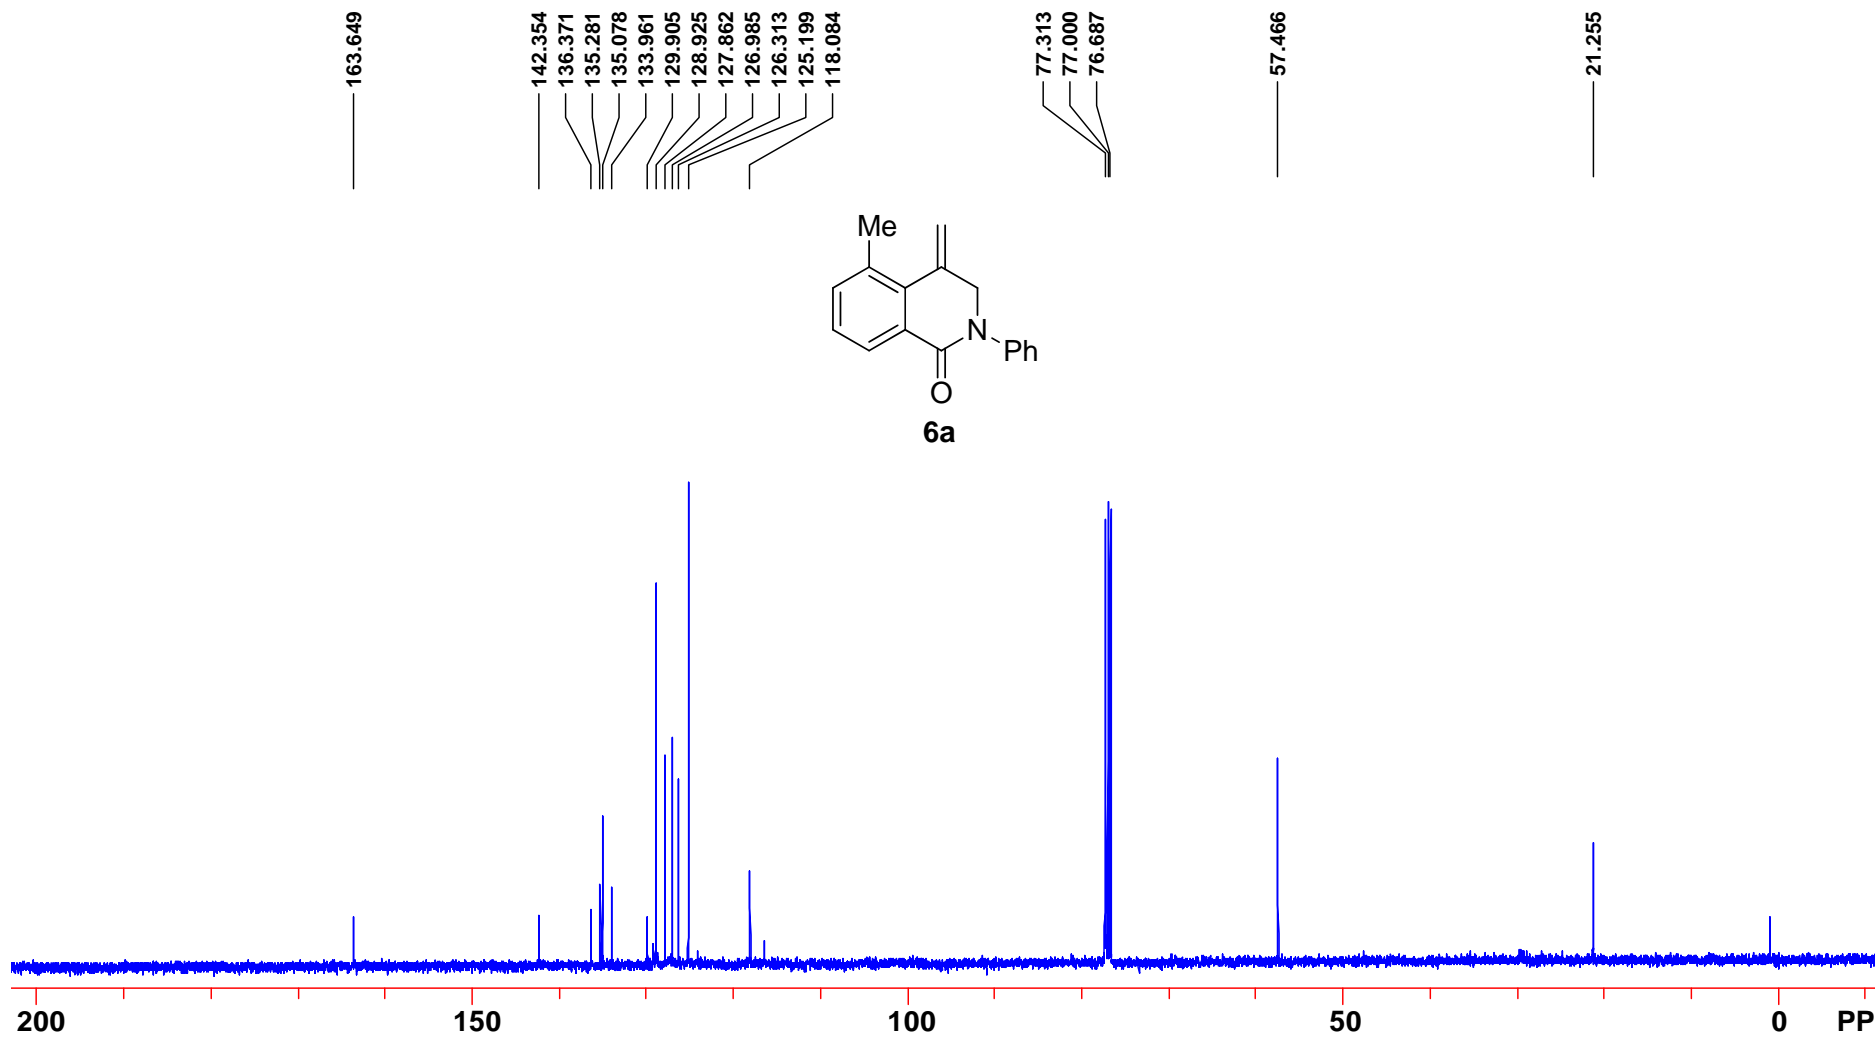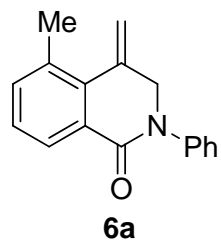

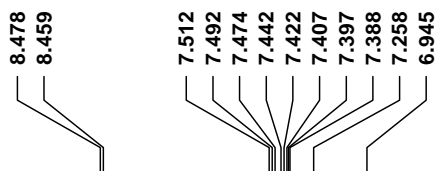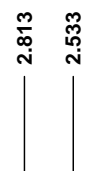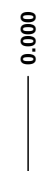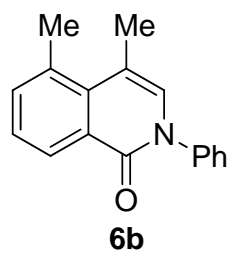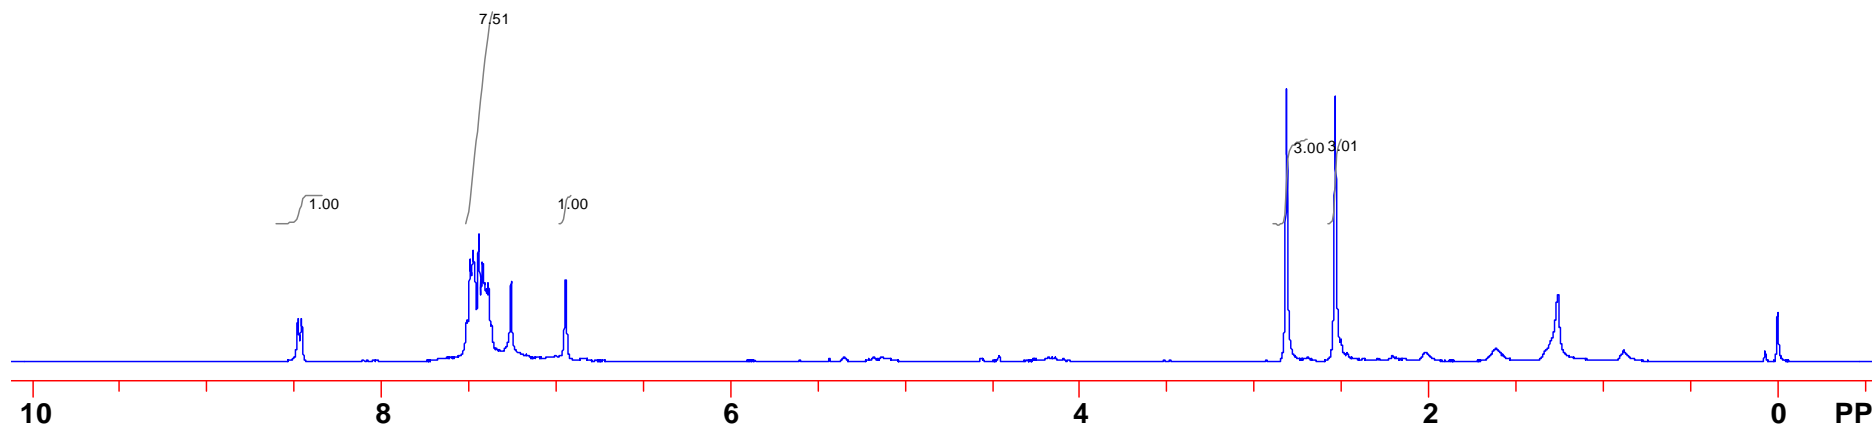

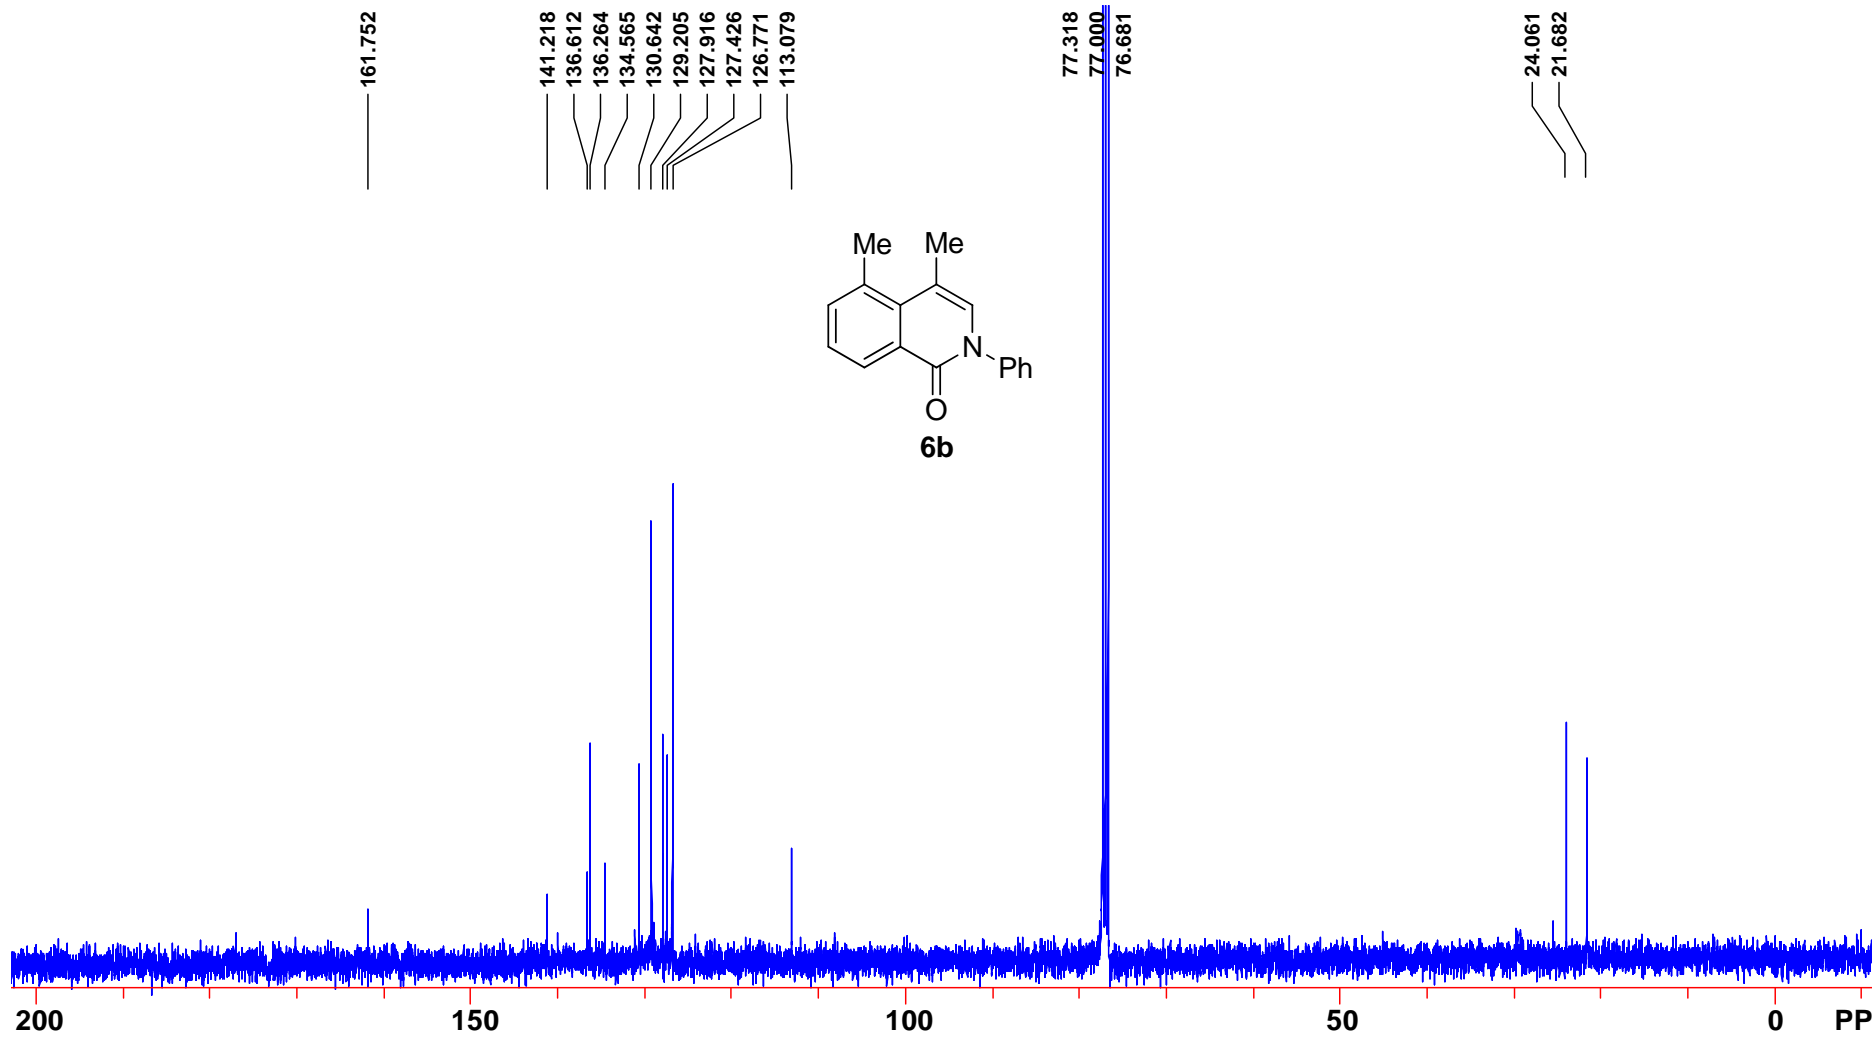

7.769  
7.750  
7.376  
7.358  
7.339  
7.274  
7.242  
7.224  
7.205  
7.183  
7.046  
7.026  
7.010  
6.652  
6.633  
6.397  
6.388  
6.379  
6.372  
6.363  
6.355  
5.394  
5.368

3.729  
3.672  
3.608  
3.551  
3.299  
3.285  
3.275  
3.263  
3.249  
3.241  
3.226  
3.121  
3.105  
3.097  
3.082  
3.071  
3.062  
3.047  
1.840  
1.417  
1.402  
1.384  
1.369  
1.362  
1.349  
1.346  
1.332  
1.327  
1.316  
1.310  
1.294  
1.276  
1.260  
1.235  
1.217  
1.198  
1.180  
1.162  
1.143  
0.789  
0.771  
0.753

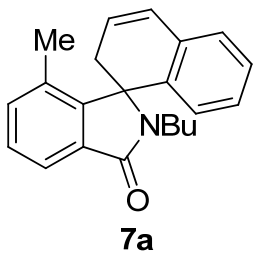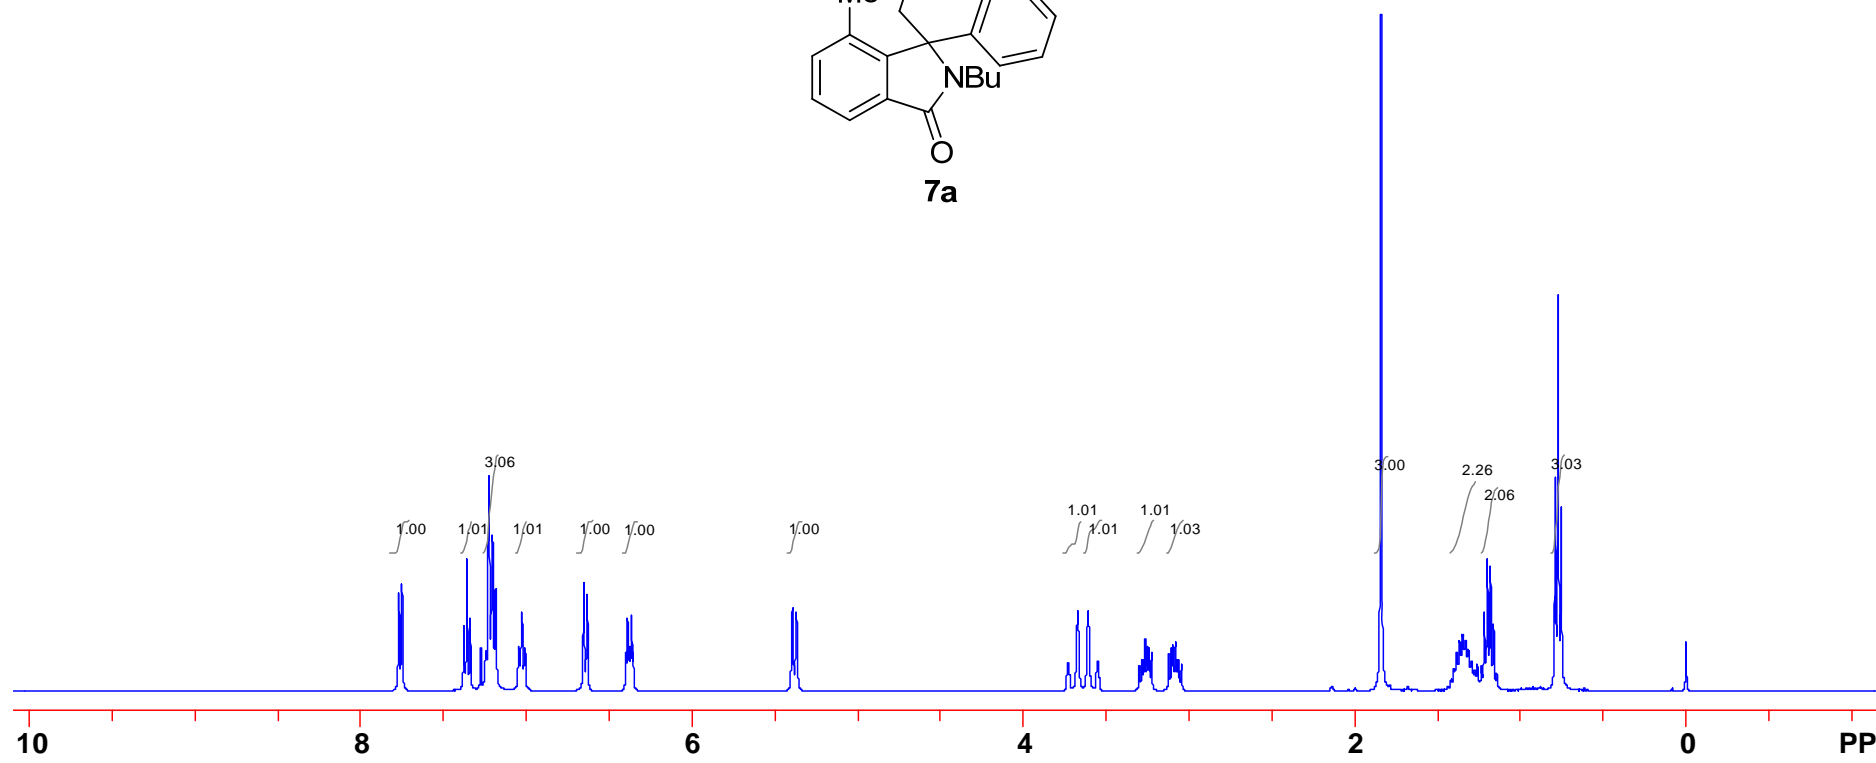

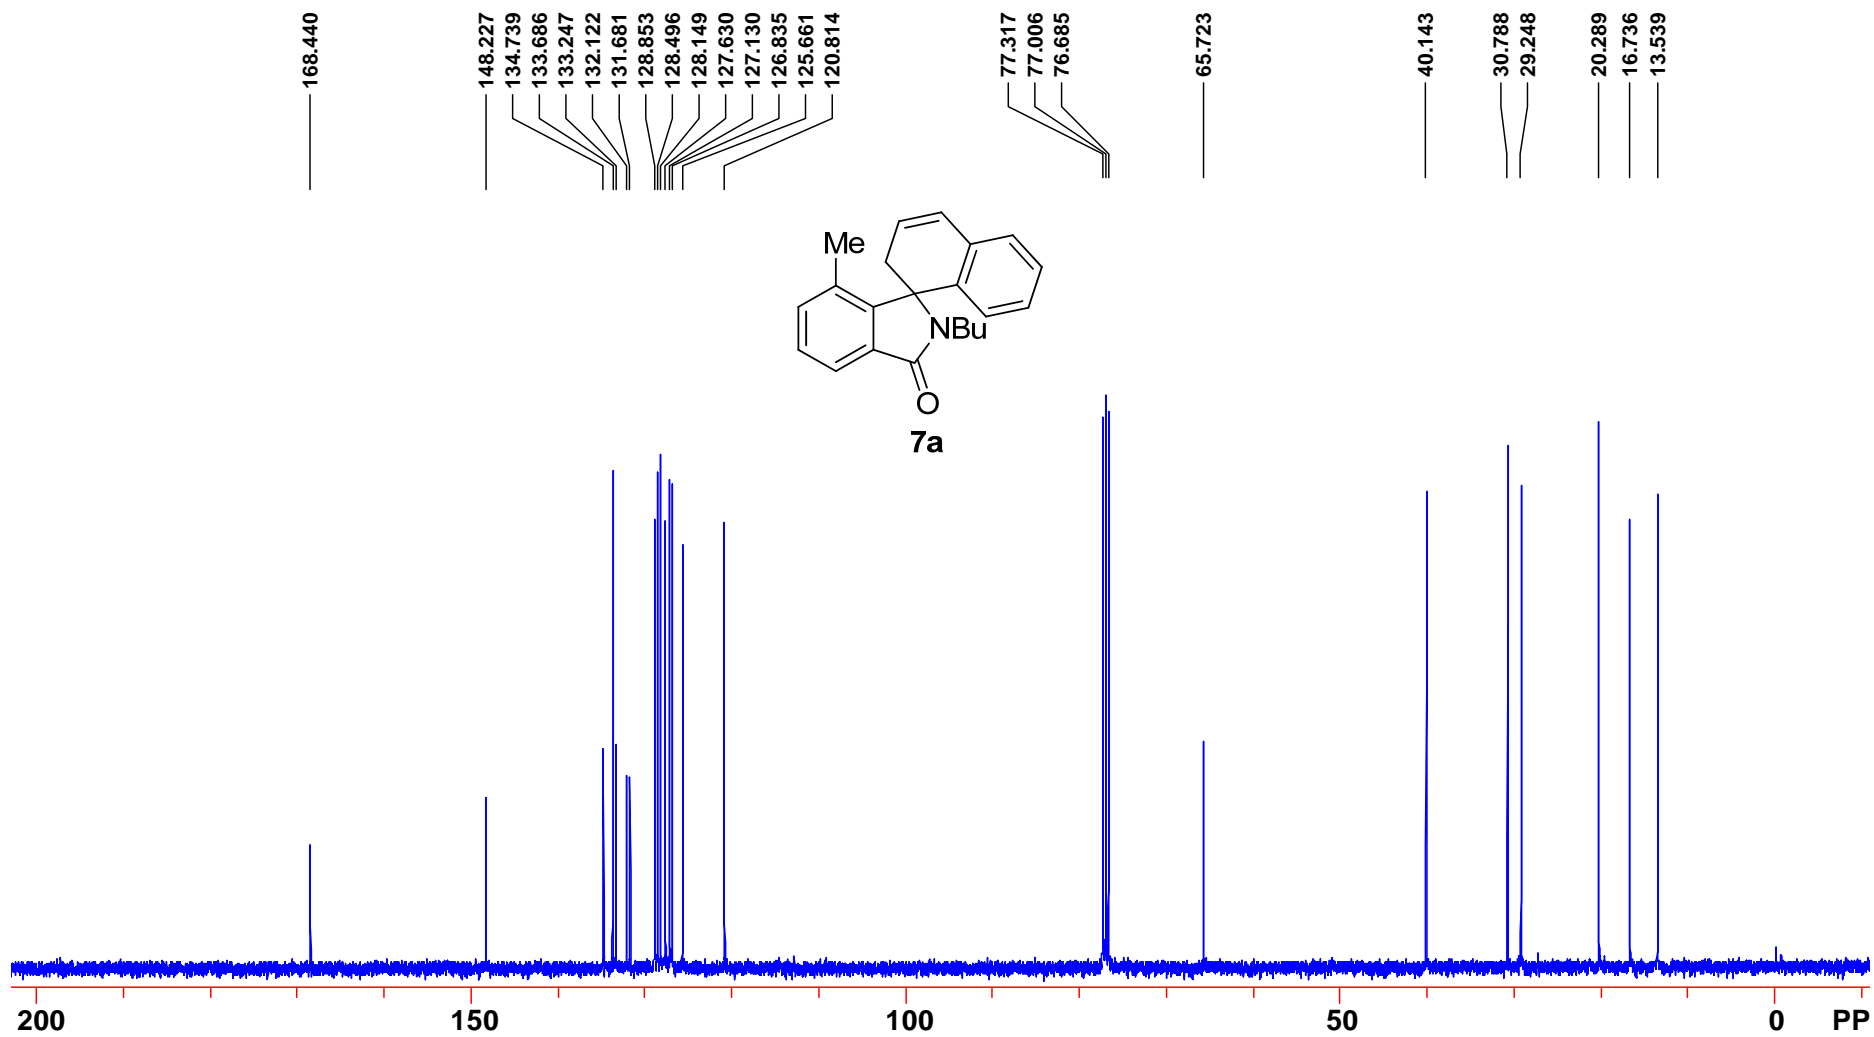

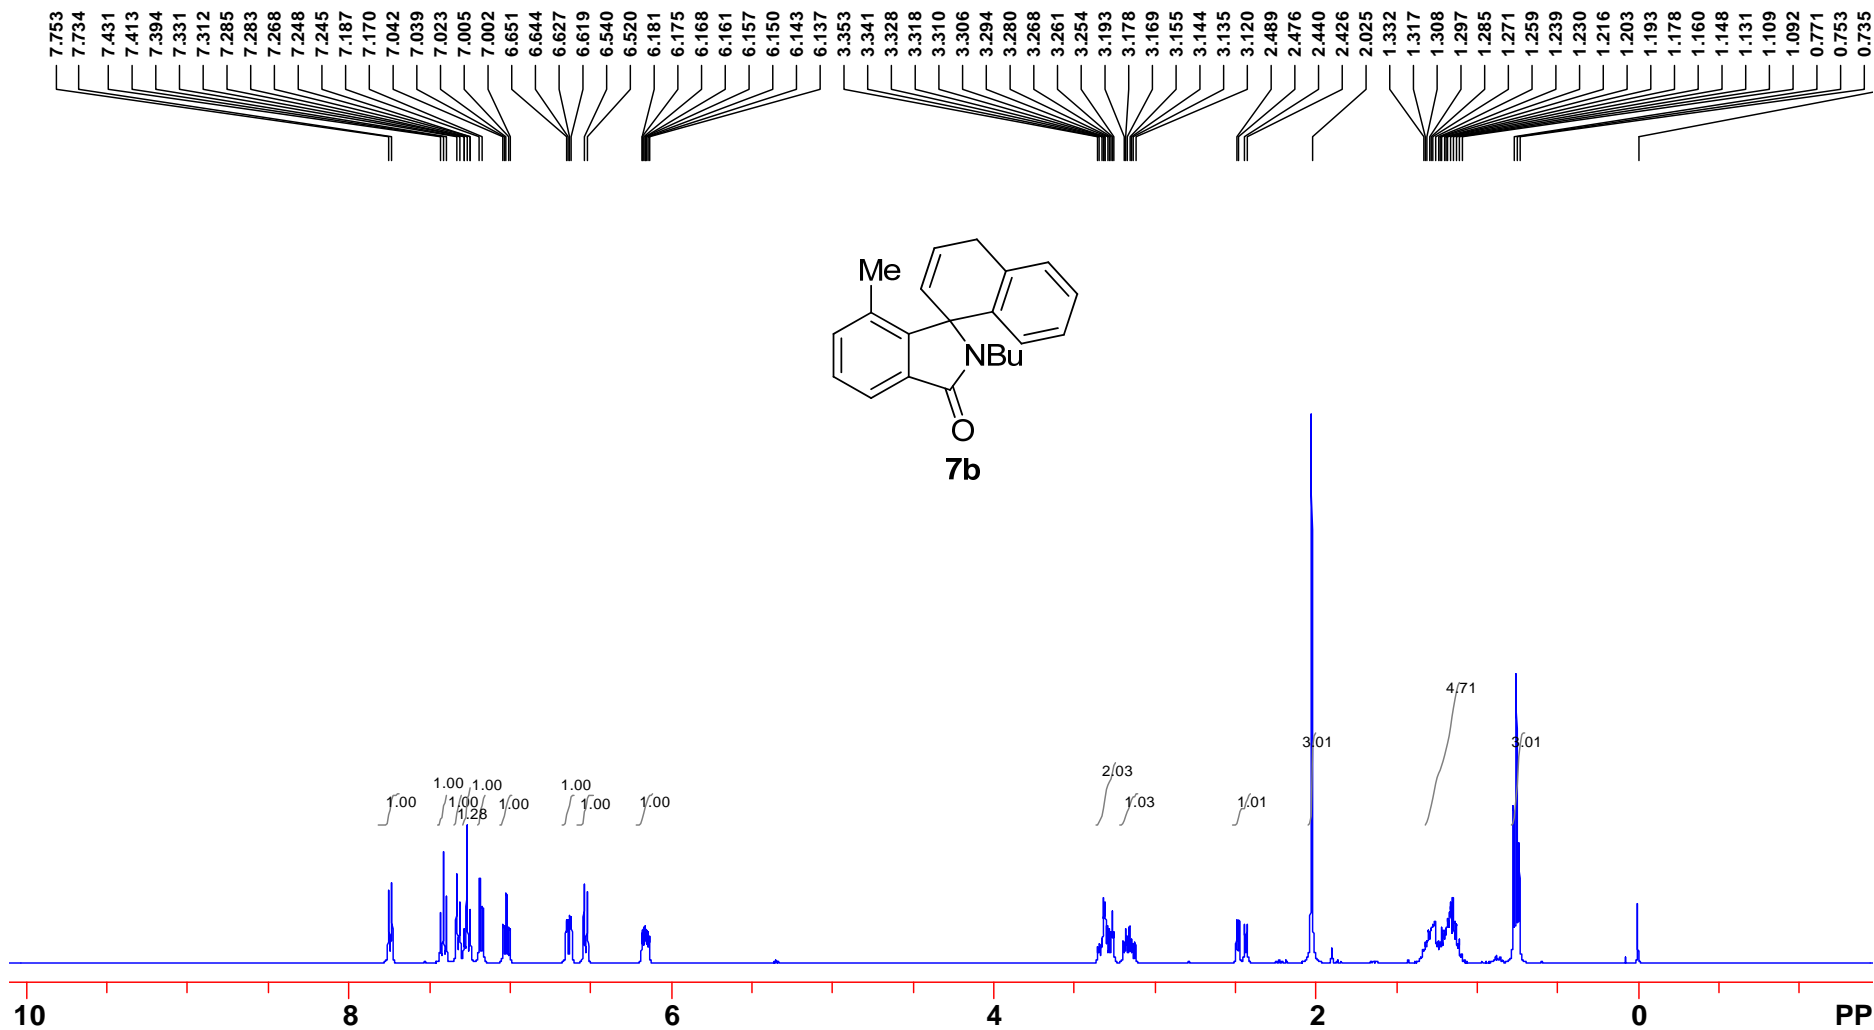



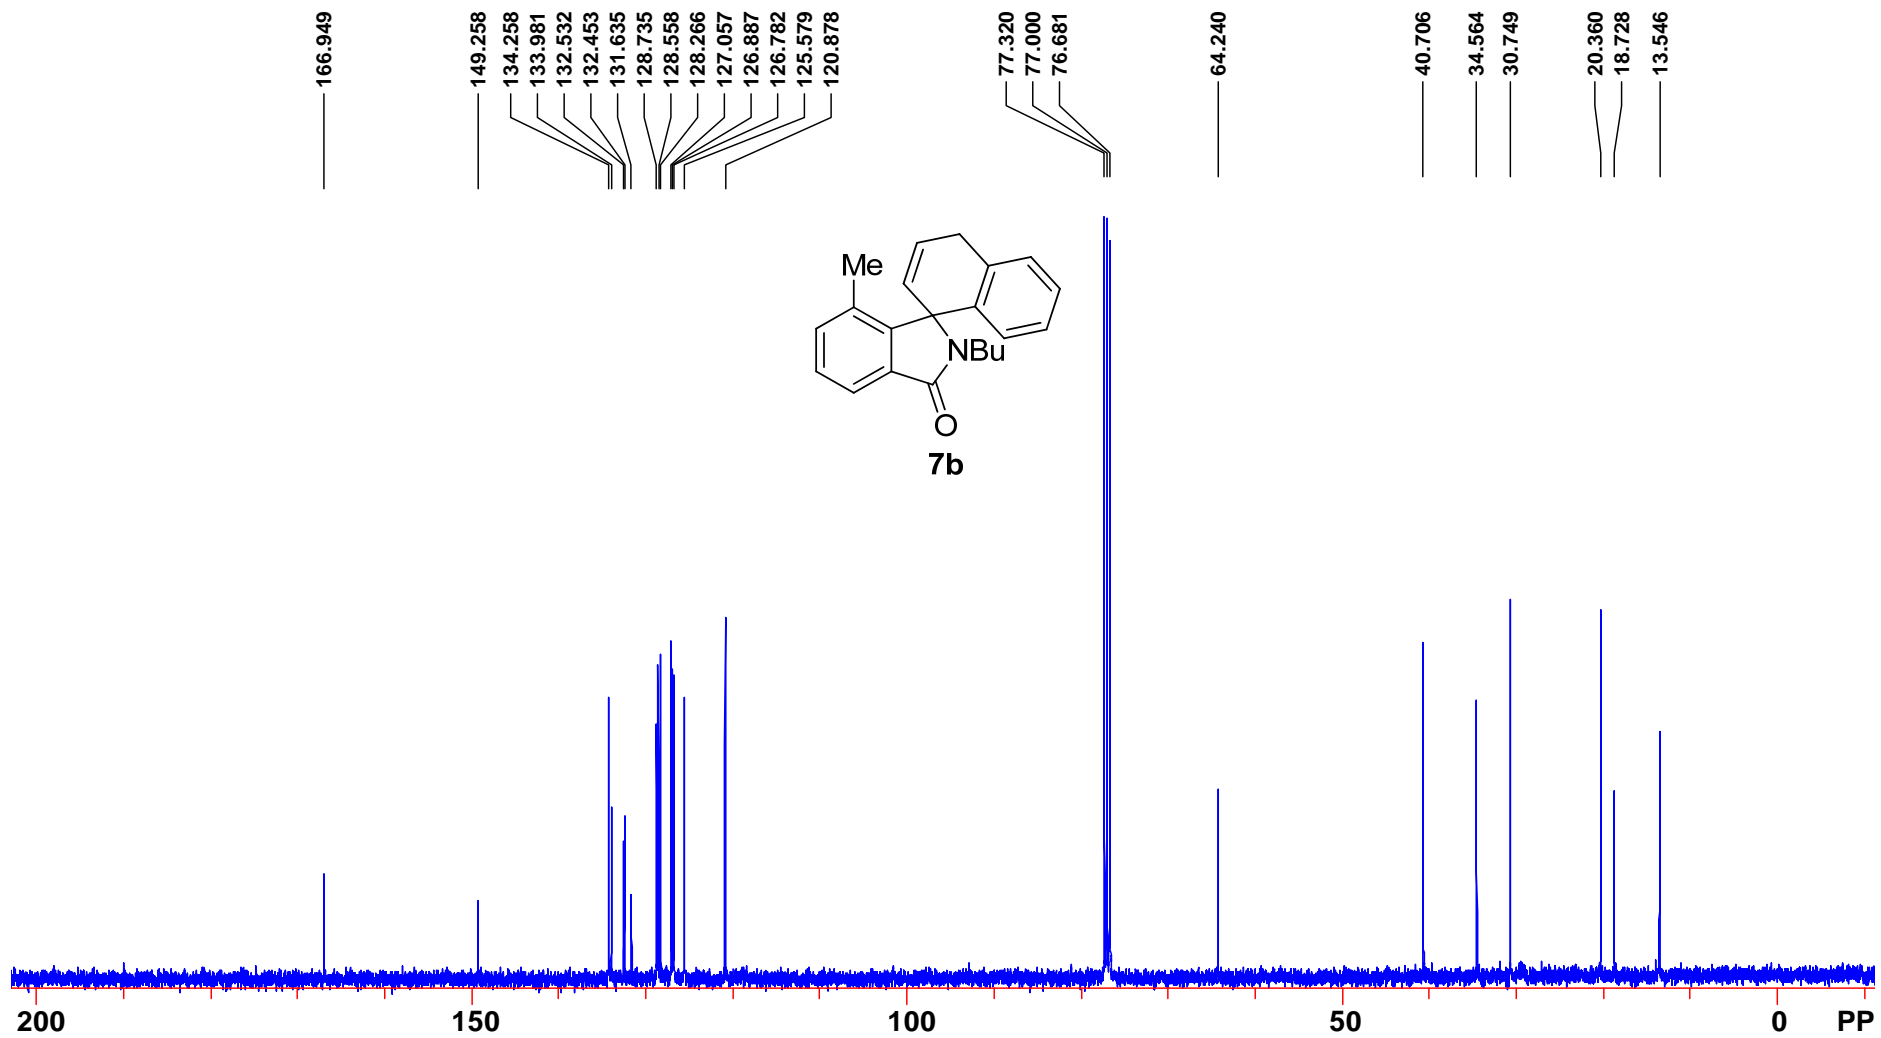

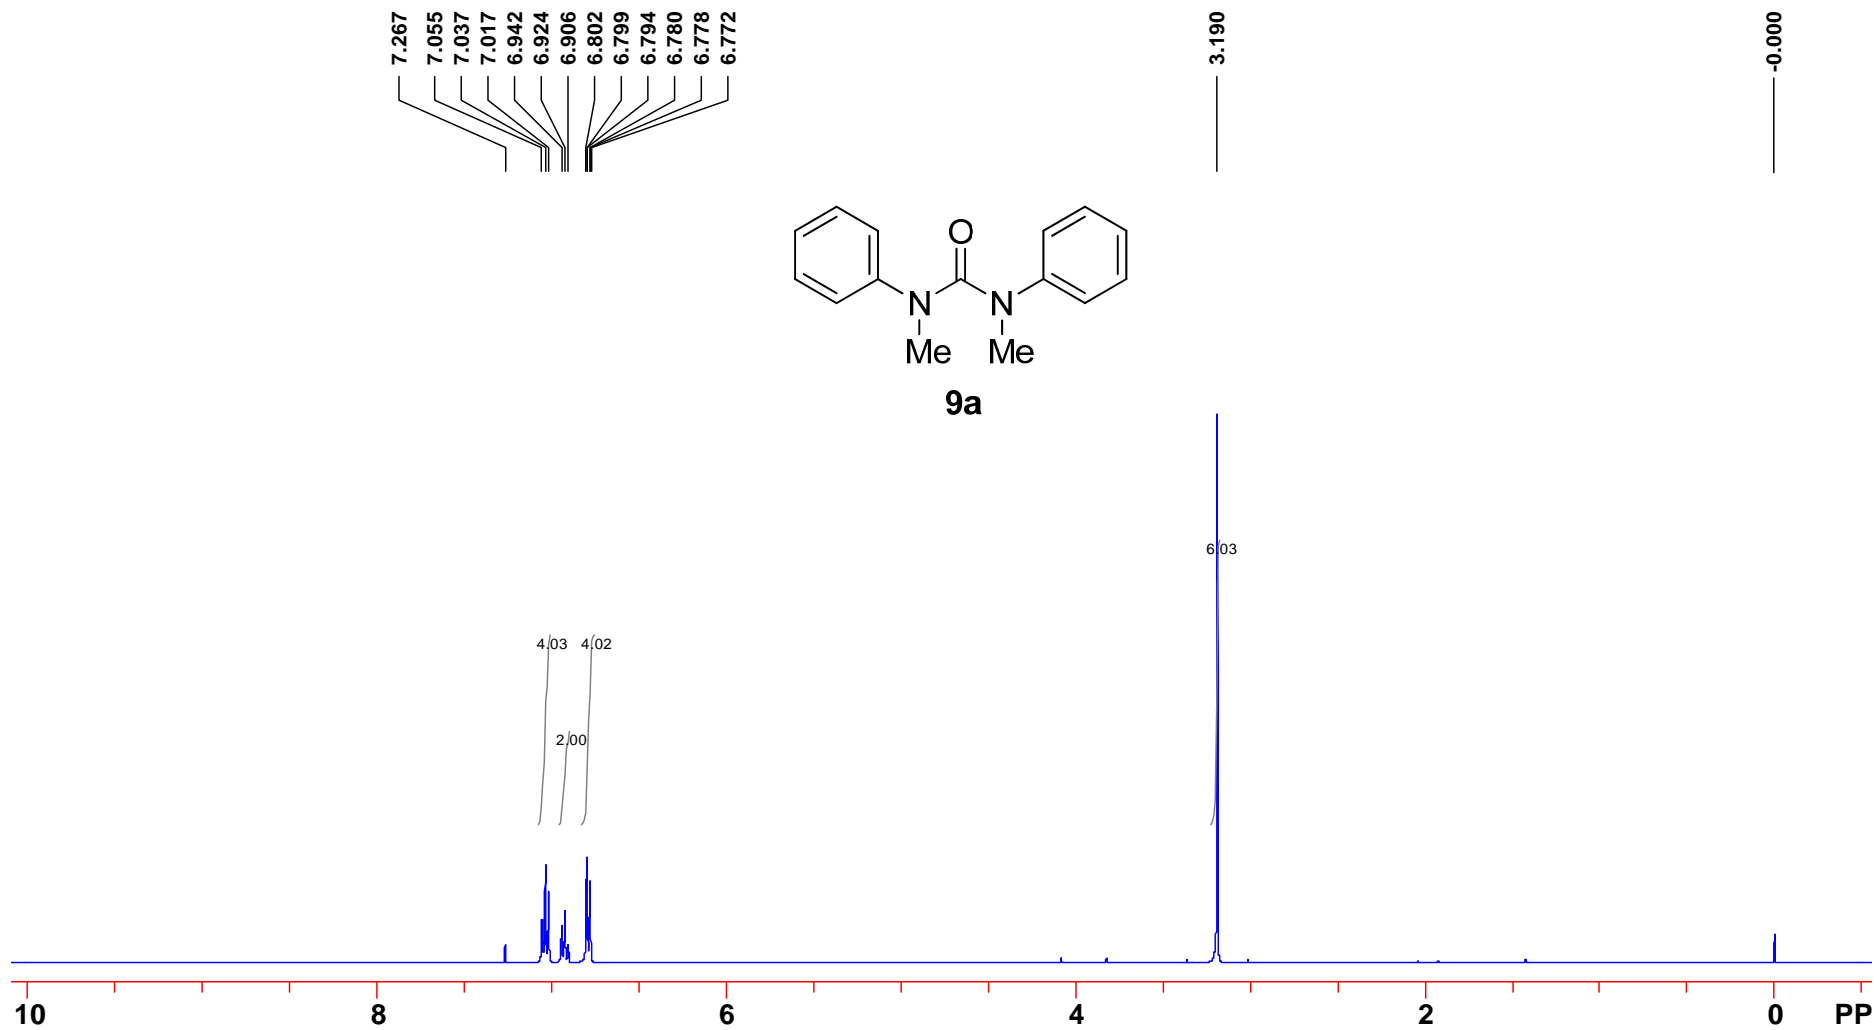

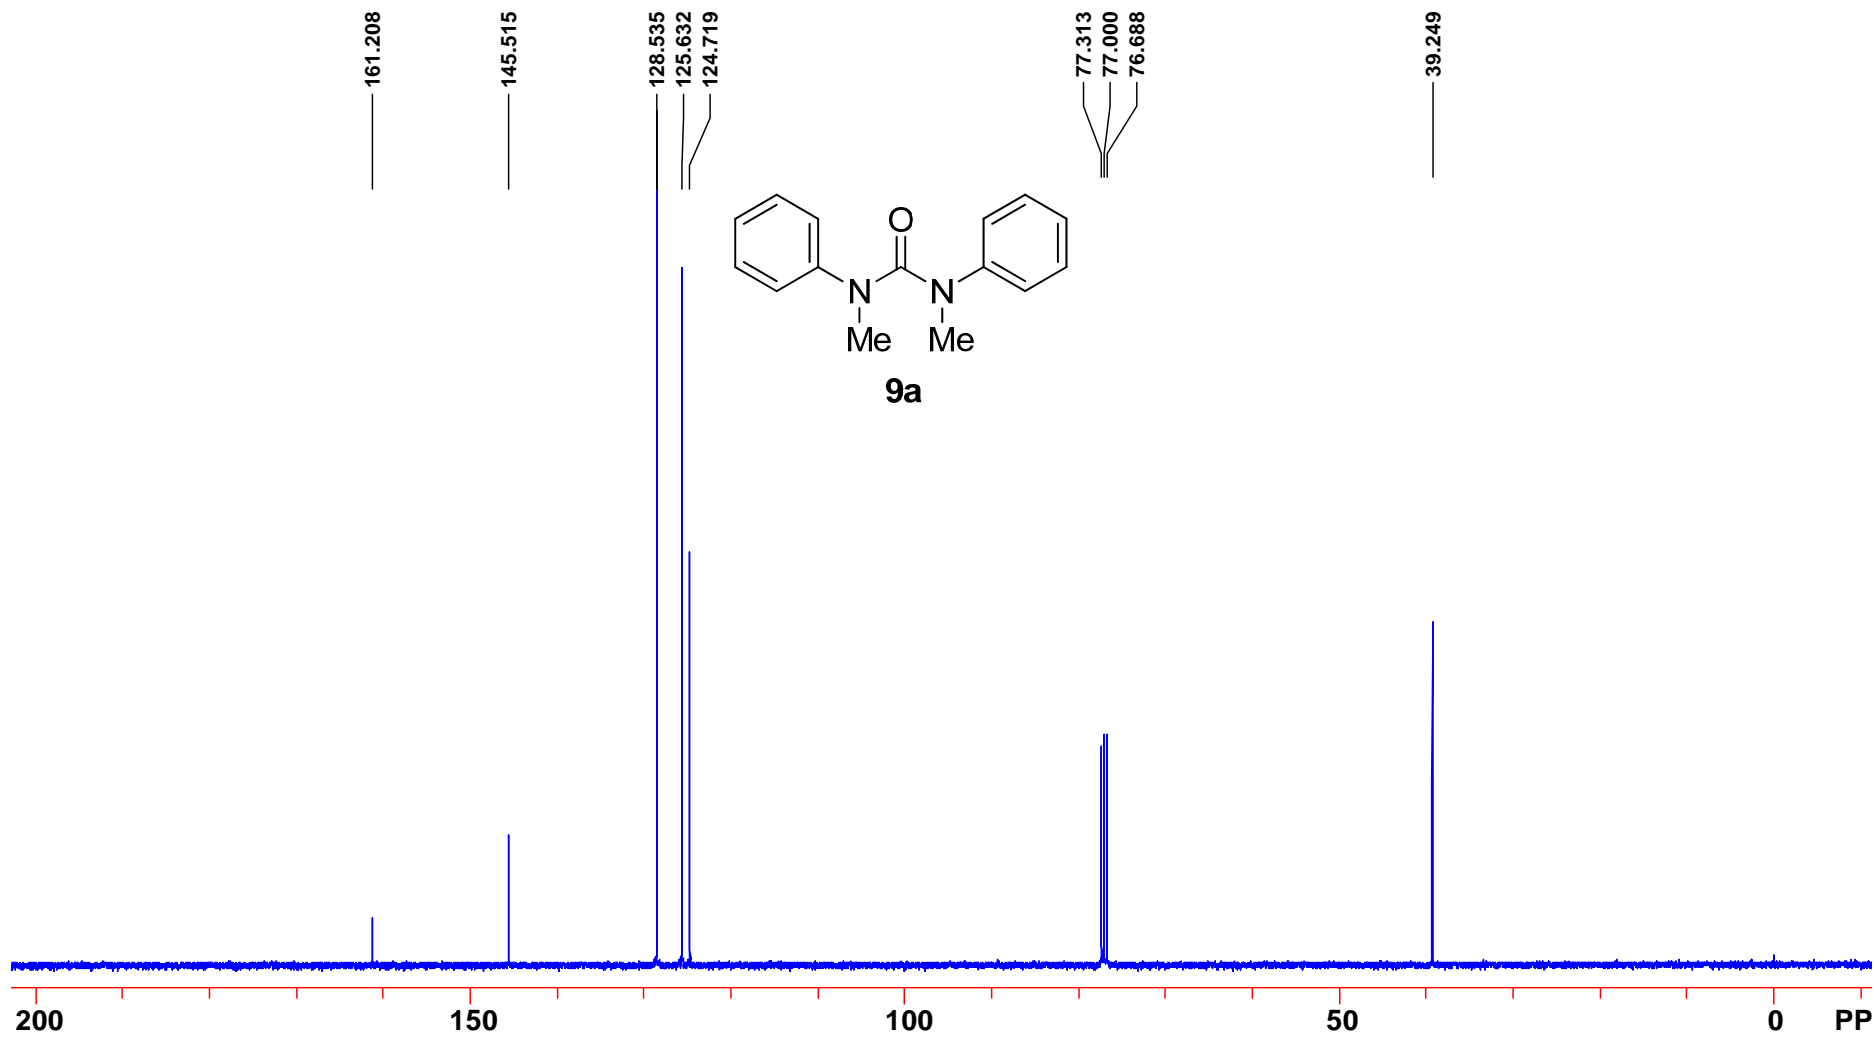

Supplement: SC-007-C6SC01148A-s001.pdf [file SC-007-C6SC01148A-s001.pdf]
